# Supplementary material
Source: publisher figshare collection journal article supplement (https://acs.figshare.com/ndownloader/files/7670740)
Supplement: Supplementary file 1 [file 7670740]

 
data_rrl18 
  
_audit_creation_method            SHELXL-2014 
_chemical_name_systematic 
; 
 ? 
; 
_chemical_name_common             ? 
_chemical_melting_point           ? 
_chemical_formula_moiety          ? 
_chemical_formula_sum 
 'C31 H48 Th' 
_chemical_formula_weight          652.73 
  
loop_ 
 _atom_type_symbol 
 _atom_type_description 
 _atom_type_scat_dispersion_real 
 _atom_type_scat_dispersion_imag 
 _atom_type_scat_source 
 'C'  'C'   0.0033   0.0016 
 'International Tables Vol C Tables 4.2.6.8 and 6.1.1.4' 
 'H'  'H'   0.0000   0.0000 
 'International Tables Vol C Tables 4.2.6.8 and 6.1.1.4' 
 'Th'  'Th'  -7.2400   8.8979 
 'International Tables Vol C Tables 4.2.6.8 and 6.1.1.4' 
  
_space_group_crystal_system       hexagonal 
_space_group_IT_number            176 
_space_group_name_H-M_alt         'P 63/m' 
_space_group_name_Hall            '-P 6c' 
  
_shelx_space_group_comment 
; 
The symmetry employed for this shelxl refinement is uniquely defined 
by the following loop, which should always be used as a source of 
symmetry information in preference to the above space-group names. 
They are only intended as comments. 
; 
  
loop_ 
 _space_group_symop_operation_xyz 
 'x, y, z' 
 '-y, x-y, z' 
 '-x+y, -x, z' 
 '-x, -y, z+1/2' 
 'y, -x+y, z+1/2' 
 'x-y, x, z+1/2' 
 '-x, -y, -z' 
 'y, -x+y, -z' 
 'x-y, x, -z' 
 'x, y, -z-1/2' 
 '-y, x-y, -z-1/2' 
 '-x+y, -x, -z-1/2' 
  
_cell_length_a                    10.0524(9) 
_cell_length_b                    10.0524(9) 
_cell_length_c                    15.4433(15) 
_cell_angle_alpha                 90 
_cell_angle_beta                  90 
_cell_angle_gamma                 120 
_cell_volume                      1351.5(3) 
_cell_formula_units_Z             2 
_cell_measurement_temperature     143(2) 
_cell_measurement_reflns_used     4483 
_cell_measurement_theta_min       2.34 
_cell_measurement_theta_max       25.73 
  
_exptl_crystal_description        hexagonal 
_exptl_crystal_colour             colorless 
_exptl_crystal_density_meas       not_measured 
_exptl_crystal_density_method     not_measured 
_exptl_crystal_density_diffrn     1.604 
_exptl_crystal_F_000              648 
_exptl_transmission_factor_min    ? 
_exptl_transmission_factor_max    ? 
_exptl_crystal_size_max           0.130 
_exptl_crystal_size_mid           0.124 
_exptl_crystal_size_min           0.033 
_exptl_absorpt_coefficient_mu     5.533 
_shelx_estimated_absorpt_T_min    0.533 
_shelx_estimated_absorpt_T_max    0.838 
_exptl_absorpt_correction_type    multi-scan 
_exptl_absorpt_correction_T_min   0.3381 
_exptl_absorpt_correction_T_max   0.4311 
_exptl_absorpt_process_details    'Bruker SADABS 2012/1' 
  
_exptl_special_details 
; 
 A colorless crystal of approximate dimensions 0.033 x 0.124 x 0.130 mm
 was mounted on a glass fiber and transferred to a Bruker SMART APEX II
 diffractometer.  The APEX2 program package was used to determine the
 unit-cell parameters and for data collection (40 sec/frame scan time
 for a sphere of diffraction data).  The raw frame data was processed
 using SAINT and SADABS to yield the reflection data file.  The systematic
 absences were consistent with the hexagonal space groups P63 and P63/m
 and P6322  The centrosymmetric space group P63/m was assigned and later
 determined to be correct.
; 
  
_diffrn_ambient_temperature       143(2) 
_diffrn_radiation_wavelength      0.71073 
_diffrn_radiation_type            MoK\a 
_diffrn_source                    'fine-focus sealed tube' 
_diffrn_measurement_device_type   'Bruker SMART APEX II CCD' 
_diffrn_measurement_method        '\f and \w scans' 
_diffrn_detector_area_resol_mean  ? 
_diffrn_reflns_number             13670 
_diffrn_reflns_av_unetI/netI      0.0175 
_diffrn_reflns_av_R_equivalents   0.0440 
_diffrn_reflns_limit_h_min        -12 
_diffrn_reflns_limit_h_max        12 
_diffrn_reflns_limit_k_min        -12 
_diffrn_reflns_limit_k_max        12 
_diffrn_reflns_limit_l_min        -19 
_diffrn_reflns_limit_l_max        19 
_diffrn_reflns_theta_min          2.339 
_diffrn_reflns_theta_max          26.364 
_diffrn_reflns_theta_full         25.500 
_diffrn_measured_fraction_theta_max   0.999 
_diffrn_measured_fraction_theta_full  0.999 
_diffrn_reflns_Laue_measured_fraction_max    0.999 
_diffrn_reflns_Laue_measured_fraction_full   0.999 
_diffrn_reflns_point_group_measured_fraction_max   0.999 
_diffrn_reflns_point_group_measured_fraction_full  0.999 
_reflns_number_total              962 
_reflns_number_gt                 815 
_reflns_threshold_expression      'I > 2\s(I)' 
_reflns_Friedel_coverage          0.000 
_reflns_Friedel_fraction_max      . 
_reflns_Friedel_fraction_full     . 
  
_reflns_special_details 
; 
 Reflections were merged by SHELXL according to the crystal 
 class for the calculation of statistics and refinement. 
  
 _reflns_Friedel_fraction is defined as the number of unique 
 Friedel pairs measured divided by the number that would be 
 possible theoretically, ignoring centric projections and 
 systematic absences. 
; 
  
_computing_data_collection        'Bruker APEX2 2013.10-0, 2013' 
_computing_cell_refinement        'Bruker SAINT 8.34a, 2013' 
_computing_data_reduction         'Bruker SAINT 8.34a, 2013' 
_computing_structure_solution     'Bruker SHELXTL 2013/1' 
_computing_structure_refinement   'SHELXL-2014 (Sheldrick, 2014)' 
_computing_molecular_graphics     'Bruker SHELXTL' 
_computing_publication_material   'Bruker SHELXTL' 
  
_refine_special_details 
; 
 The structure was solved by direct methods and refined on F2 by full-matrix
 least-squares techniques.  The analytical scattering factorsfor neutral atoms
 were used throughout the analysis. Hydrogen atoms were included using a riding
 model.  The molecule was located on a site of 6bar symmetry resulting in disorder
 of methyl carbon C(7).  Partial site-occupancy-factors were employed to account
 for the disordered atom.  At convergence, wR2 = 0.0840 and Goof = 1.178 for 58
 variables refined against 962 data (0.80 �), R1 = 0.0333 for those 815 data
 with I > 2.0sigma(I).
; 
_refine_ls_structure_factor_coef  Fsqd 
_refine_ls_matrix_type            full 
_refine_ls_weighting_scheme       calc 
_refine_ls_weighting_details 
'w=1/[\s^2^(Fo^2^)+(0.0003P)^2^+13.0726P] where P=(Fo^2^+2Fc^2^)/3' 
_atom_sites_solution_primary      direct 
_atom_sites_solution_secondary    difmap 
_atom_sites_solution_hydrogens    geom 
_refine_ls_hydrogen_treatment     constr 
_refine_ls_extinction_method      none 
_refine_ls_extinction_coef        ? 
_refine_ls_number_reflns          962 
_refine_ls_number_parameters      58 
_refine_ls_number_restraints      0 
_refine_ls_R_factor_all           0.0469 
_refine_ls_R_factor_gt            0.0333 
_refine_ls_wR_factor_ref          0.0840 
_refine_ls_wR_factor_gt           0.0690 
_refine_ls_goodness_of_fit_ref    1.178 
_refine_ls_restrained_S_all       1.178 
_refine_ls_shift/su_max           0.000 
_refine_ls_shift/su_mean          0.000 
  
loop_ 
 _atom_site_label 
 _atom_site_type_symbol 
 _atom_site_fract_x 
 _atom_site_fract_y 
 _atom_site_fract_z 
 _atom_site_U_iso_or_equiv 
 _atom_site_adp_type 
 _atom_site_occupancy 
 _atom_site_site_symmetry_order 
 _atom_site_calc_flag 
 _atom_site_refinement_flags_posn 
 _atom_site_refinement_flags_adp 
 _atom_site_refinement_flags_occupancy 
 _atom_site_disorder_assembly 
 _atom_site_disorder_group 
Th1 Th 0.3333 0.6667 0.2500 0.0354(2) Uani 1 6 d S T P . . 
C1 C 0.1389(8) 0.3293(8) 0.2500 0.0263(18) Uani 1 2 d S T P . . 
C2 C 0.2339(7) 0.3684(7) 0.1758(4) 0.0274(13) Uani 1 1 d . . . . . 
C3 C 0.3866(6) 0.4223(6) 0.2051(4) 0.0225(11) Uani 1 1 d . . . . . 
C4 C -0.0318(9) 0.2192(9) 0.2500 0.042(3) Uani 1 2 d S T P . . 
H4A H -0.0724 0.2118 0.1914 0.063 Uiso 0.5 1 calc R U P . . 
H4B H -0.0819 0.2566 0.2897 0.063 Uiso 0.5 1 calc R U P . . 
H4C H -0.0522 0.1176 0.2689 0.063 Uiso 0.5 1 calc R U P . . 
C5 C 0.1795(11) 0.3229(13) 0.0852(5) 0.077(3) Uani 1 1 d . . . . . 
H5A H 0.0727 0.2996 0.0805 0.116 Uiso 1 1 calc R U . . . 
H5B H 0.1858 0.2318 0.0696 0.116 Uiso 1 1 calc R U . . . 
H5C H 0.2440 0.4075 0.0459 0.116 Uiso 1 1 calc R U . . . 
C6 C 0.5108(7) 0.4361(7) 0.1447(4) 0.0349(15) Uani 1 1 d . . . . . 
H6A H 0.5965 0.4432 0.1787 0.052 Uiso 1 1 calc R U . . . 
H6B H 0.5472 0.5285 0.1091 0.052 Uiso 1 1 calc R U . . . 
H6C H 0.4694 0.3454 0.1072 0.052 Uiso 1 1 calc R U . . . 
C7 C 0.3333 0.6667 0.0767(10) 0.021(4) Uani 0.5 3 d S T P . . 
H7A H 0.4005 0.6291 0.0556 0.031 Uiso 0.1667 1 calc R U P . . 
H7B H 0.3709 0.7714 0.0556 0.031 Uiso 0.1667 1 calc R U P . . 
H7C H 0.2286 0.5995 0.0556 0.031 Uiso 0.1667 1 calc R U P . . 
  
loop_ 
 _atom_site_aniso_label 
 _atom_site_aniso_U_11 
 _atom_site_aniso_U_22 
 _atom_site_aniso_U_33 
 _atom_site_aniso_U_23 
 _atom_site_aniso_U_13 
 _atom_site_aniso_U_12 
Th1 0.00921(18) 0.00921(18) 0.0878(5) 0.000 0.000 0.00460(9) 
C1 0.015(4) 0.011(3) 0.053(5) 0.000 0.000 0.006(3) 
C2 0.026(3) 0.027(3) 0.034(3) -0.006(3) -0.004(3) 0.017(2) 
C3 0.021(3) 0.018(2) 0.032(3) 0.001(2) 0.004(2) 0.012(2) 
C4 0.018(4) 0.016(4) 0.086(8) 0.000 0.000 0.005(3) 
C5 0.072(6) 0.145(10) 0.049(5) -0.042(6) -0.030(5) 0.079(7) 
C6 0.031(3) 0.029(3) 0.049(4) 0.003(3) 0.012(3) 0.018(3) 
C7 0.030(6) 0.030(6) 0.001(7) 0.000 0.000 0.015(3) 
  
_geom_special_details 
; 
 All esds (except the esd in the dihedral angle between two l.s. planes) 
 are estimated using the full covariance matrix.  The cell esds are taken 
 into account individually in the estimation of esds in distances, angles 
 and torsion angles; correlations between esds in cell parameters are only 
 used when they are defined by crystal symmetry.  An approximate (isotropic) 
 treatment of cell esds is used for estimating esds involving l.s. planes. 
; 
  
loop_ 
 _geom_bond_atom_site_label_1 
 _geom_bond_atom_site_label_2 
 _geom_bond_distance 
 _geom_bond_site_symmetry_2 
 _geom_bond_publ_flag 
Th1 Cnt 2.620 . ? 
Th1 C7 2.676(15) . ? 
Th1 C3 2.849(5) . ? 
Th1 C2 2.882(6) . ? 
Th1 C1 2.949(7) . ? 
C1 C2 1.416(7) . ? 
C1 C4 1.507(10) . ? 
C2 C3 1.423(7) . ? 
C2 C5 1.488(9) . ? 
C3 C3 1.388(11) 10_556 ? 
C3 C6 1.509(7) . ? 
  
loop_ 
 _geom_angle_atom_site_label_1 
 _geom_angle_atom_site_label_2 
 _geom_angle_atom_site_label_3 
 _geom_angle 
 _geom_angle_site_symmetry_1 
 _geom_angle_site_symmetry_3 
 _geom_angle_publ_flag 
Cnt Th1 C7 90.00 . . ? 
Cnt Th1 Cnt 120.00 . . ? 
C7 Th1 C7 180.0 10_556 . ? 
C7 Th1 C3 75.90(11) . . ? 
C7 Th1 C3 104.10(11) 10_556 3_565 ? 
C3 Th1 C3 28.2(2) 3_565 12_566 ? 
C3 Th1 C3 121.98(3) 3_565 11_666 ? 
C3 Th1 C3 114.27(9) 12_566 11_666 ? 
C7 Th1 C2 113.45(12) 10_556 3_565 ? 
C7 Th1 C2 66.55(12) . 3_565 ? 
C3 Th1 C2 46.92(16) 12_566 3_565 ? 
C3 Th1 C2 96.65(15) 11_666 3_565 ? 
C3 Th1 C2 85.53(15) 2_665 3_565 ? 
C3 Th1 C2 149.07(15) 10_556 3_565 ? 
C3 Th1 C2 131.61(16) . 3_565 ? 
C2 Th1 C2 125.39(6) 3_565 11_666 ? 
C2 Th1 C2 105.22(14) 12_566 11_666 ? 
C2 Th1 C2 105.22(14) 3_565 2_665 ? 
C2 Th1 C2 125.39(6) 12_566 2_665 ? 
C2 Th1 C2 46.9(2) 11_666 2_665 ? 
C3 Th1 C2 28.74(15) . . ? 
C3 Th1 C1 46.40(17) 3_565 3_565 ? 
C3 Th1 C1 75.77(17) 2_665 3_565 ? 
C3 Th1 C1 159.30(15) . 3_565 ? 
C2 Th1 C1 28.08(14) 12_566 3_565 ? 
C2 Th1 C1 102.91(17) 2_665 3_565 ? 
C2 Th1 C1 131.22(17) . 3_565 ? 
C7 Th1 C1 90.000(2) . 2_665 ? 
C3 Th1 C1 159.30(15) 3_565 2_665 ? 
C3 Th1 C1 46.40(17) . . ? 
C3 Th1 C1 75.77(17) . 2_665 ? 
C1 Th1 C1 120.0 2_665 . ? 
C2 Th1 C1 102.91(17) 3_565 . ? 
C2 C1 C2 108.2(7) 10_556 . ? 
C2 C1 C4 124.5(4) . . ? 
C2 C1 Th1 73.3(4) . . ? 
C4 C1 Th1 134.5(5) . . ? 
C1 C2 C3 107.3(5) . . ? 
C1 C2 C5 125.6(6) . . ? 
C3 C2 C5 125.2(6) . . ? 
C1 C2 Th1 78.6(4) . . ? 
C3 C2 Th1 74.3(3) . . ? 
C5 C2 Th1 125.2(5) . . ? 
C3 C3 C2 108.6(3) 10_556 . ? 
C3 C3 C6 128.2(3) 10_556 . ? 
C2 C3 C6 121.6(5) . . ? 
C3 C3 Th1 75.90(11) 10_556 . ? 
C2 C3 Th1 76.9(3) . . ? 
C6 C3 Th1 125.1(4) . . ? 
  
_refine_diff_density_max    2.161 
_refine_diff_density_min   -5.816 
_refine_diff_density_rms    0.175 
  
_shelxl_version_number 2014-3 
  
_shelx_res_file 
; 
TITL rrl18 in P6(3)/m 
CELL 0.71073  10.05240  10.05240  15.44330  90.0000  90.0000 120.0000 
ZERR    2.00   0.00090   0.00090   0.00150   0.0000   0.0000   0.0000 
LATT  1 
SYMM -Y, X-Y, Z 
SYMM -X+Y, -X, Z 
SYMM -X, -Y, 0.5+Z 
SYMM Y, -X+Y, 0.5+Z 
SYMM X-Y, X, 0.5+Z 
SFAC C H TH 
UNIT 62 96 2 
TEMP -130.000 
SIZE 0.033 0.124 0.13 
  
rem APRX2 2013.10-0, SAINT 8.34a, SADABS 2012/1, SHELXTL 2014/3 
rem 40s sphere ccd2 
  
shel 100 0.8 
omit 0 0 2 
  
CONN 17 TH1 
  
L.S. 10 
ACTA 51 
  
FMAP 2 
PLAN 10 
  
WGHT    0.000300   13.072597 
FVAR       0.11594 
TH1   3    0.333333    0.666667    0.250000    10.16667    0.00921    0.00921 = 
         0.08777    0.00000    0.00000    0.00460 
C1    1    0.138944    0.329280    0.250000    10.50000    0.01524    0.01082 = 
         0.05263    0.00000    0.00000    0.00641 
C2    1    0.233859    0.368431    0.175755    11.00000    0.02628    0.02661 = 
         0.03400   -0.00638   -0.00400    0.01681 
C3    1    0.386581    0.422343    0.205078    11.00000    0.02106    0.01797 = 
         0.03208    0.00143    0.00379    0.01243 
C4    1   -0.031832    0.219169    0.250000    10.50000    0.01808    0.01633 = 
         0.08633    0.00000    0.00000    0.00534 
AFIX 137 
H4A   2   -0.072357    0.211757    0.191390    10.50000   -1.50000 
H4B   2   -0.081930    0.256568    0.289712    10.50000   -1.50000 
H4C   2   -0.052239    0.117593    0.268898    10.50000   -1.50000 
AFIX   0 
C5    1    0.179464    0.322941    0.085223    11.00000    0.07156    0.14486 = 
         0.04898   -0.04222   -0.03027    0.07921 
AFIX 137 
H5A   2    0.072682    0.299560    0.080537    11.00000   -1.50000 
H5B   2    0.185841    0.231813    0.069575    11.00000   -1.50000 
H5C   2    0.244032    0.407481    0.045916    11.00000   -1.50000 
AFIX   0 
C6    1    0.510817    0.436073    0.144706    11.00000    0.03091    0.02880 = 
         0.04949    0.00262    0.01216    0.01826 
AFIX 137 
H6A   2    0.596500    0.443162    0.178653    11.00000   -1.50000 
H6B   2    0.547244    0.528544    0.109085    11.00000   -1.50000 
H6C   2    0.469418    0.345433    0.107160    11.00000   -1.50000 
AFIX   0 
C7    1    0.333333    0.666667    0.076731    10.16667    0.03042    0.03042 = 
         0.00148    0.00000    0.00000    0.01521 
AFIX 137 
H7A   2    0.400472    0.629050    0.055578    10.16667   -1.50000 
H7B   2    0.370950    0.771422    0.055578    10.16667   -1.50000 
H7C   2    0.228578    0.599528    0.055578    10.16667   -1.50000 
AFIX   0 
HKLF 4 
  
REM  rrl18 in P6(3)/m 
REM R1 =  0.0333 for     815 Fo > 4sig(Fo)  and  0.0469 for all     962 data 
REM     58 parameters refined using      0 restraints 
  
END 
  
WGHT      0.0000     13.0132 
  
REM Highest difference peak  2.161,  deepest hole -5.816,  1-sigma level  0.175 
Q1    1   0.3333  0.6667  0.1454  10.33333  0.05    2.16 
Q2    1   0.3333  0.6667  0.0352  10.33333  0.05    0.93 
Q3    1   0.1989  0.3397  0.2171  11.00000  0.05    0.61 
Q4    1   0.4208  0.7958  0.2500  10.50000  0.05    0.59 
Q5    1   0.2365  0.5506  0.2500  10.50000  0.05    0.53 
Q6    1   0.2084  0.3964  0.0979  11.00000  0.05    0.47 
Q7    1   0.3109  0.7248  0.0941  11.00000  0.05    0.44 
Q8    1   0.4194  0.4204  0.1795  11.00000  0.05    0.43 
Q9    1   0.0000  0.0000  0.2841  10.33333  0.05    0.40 
Q10   1   0.0000  0.0000  0.3455  10.33333  0.05    0.38 
; 
_shelx_res_checksum   83283 
  
_shelx_hkl_file 
; 
   0   1   0  109.14    2.04 
   1  -1   0  108.53    2.36 
   1   0   0  109.86    2.04 
   0   1   0  110.57    2.18 
   1  -1   0  110.45    1.94 
  -1   0   0  110.58    2.23 
  -1   1   0  111.58    2.15 
   0  -1   0  112.68    2.12 
   0   1   0  114.16    2.35 
  -1   0   0  110.53    2.04 
  -1   1   0  108.37    2.21 
   1   0   0  109.08    2.30 
  -1  -1   0   56.47    1.51 
   1   1   0   54.47    1.68 
  -2   1   0   58.56    1.61 
   2  -1   0   54.99    1.69 
   1  -2   0   53.88    1.41 
   1   1   0   58.33    1.53 
   2  -1   0   54.44    1.04 
   1   1   0   55.21    1.15 
  -1   2   0   54.31    1.77 
  -1   2   0   56.80    1.50 
  -2   1   0   55.66    1.50 
  -1   2   0   57.85    1.53 
   2   0   0   80.86    1.80 
   2   0   0   79.03    2.21 
   0   2   0   79.22    1.78 
   2  -2   0   80.27    2.28 
  -2   0   0   82.01    2.12 
   0   2   0   82.00    2.28 
  -2   2   0   79.98    2.12 
   2  -2   0   81.26    1.62 
   0  -2   0   78.18    1.89 
   0   2   0   80.00    2.06 
  -2   2   0   80.56    1.99 
  -2   0   0   79.24    1.79 
   2  -3   0  154.03    3.16 
   3  -1   0  155.68    3.77 
   1   2   0  156.97    2.89 
   1   2   0  154.43    3.49 
   1   2   0  157.24    3.77 
  -3   1   0  152.96    3.35 
  -1  -2   0  156.91    3.42 
  -2   3   0  153.40    3.34 
  -2   3   0  144.11    3.85 
  -2   3   0  159.75    3.53 
  -3   1   0  157.73    3.61 
   3  -1   0  154.48    2.86 
   3  -2   0   31.68    1.44 
   2   1   0   30.94    1.18 
  -1   3   0   29.67    1.16 
  -3   2   0   29.66    1.26 
  -3   2   0   29.50    1.24 
   2   1   0   34.61    1.49 
   1  -3   0   29.30    1.18 
  -1   3   0   30.08    1.15 
  -2  -1   0   29.16    1.23 
  -1   3   0   26.52    1.40 
   3   0   0  177.44    3.62 
   3  -3   0  186.29    3.35 
   0   3   0  178.50    4.37 
   3   0   0  180.12    4.32 
   0  -3   0  173.98    3.75 
  -3   0   0  180.79    3.62 
   3  -3   0  185.48    4.43 
   0   3   0  179.54    3.60 
  -3   3   0  179.52    3.92 
  -3   0   0  172.80    4.06 
   0   3   0  173.33    3.97 
   3  -4   0  118.85    2.65 
  -3   4   0  114.54    2.91 
   1   3   0  119.72    2.42 
   1   3   0  117.31    3.45 
  -4   1   0  115.53    2.85 
  -1  -3   0  115.80    2.93 
  -3   4   0  110.83    3.12 
   3  -4   0  109.25    3.47 
   4  -1   0  114.91    2.42 
   4  -1   0  111.98    3.31 
  -4   1   0  116.59    3.23 
   1   3   0  118.44    3.14 
   4  -2   0  636.30   12.34 
  -2   4   0  636.06   11.62 
  -2   4   0  602.40   11.58 
   2   2   0  648.94   10.69 
  -2   4   0  618.60   12.58 
   2   2   0  629.18   11.51 
  -4   2   0  642.08   11.81 
  -2  -2   0  616.43   11.61 
  -4   2   0  641.65   11.64 
   2   2   0  628.30   12.28 
   2  -4   0  631.49   11.30 
  -4   3   0    7.33    0.81 
   1  -4   0    6.63    0.79 
   3   1   0    7.21    1.02 
  -1   4   0   10.08    1.18 
   3   1   0    9.36    0.86 
  -3  -1   0    6.27    0.81 
  -1   4   0    9.66    0.83 
   4  -3   0    8.42    1.01 
   1  -4   0    8.82    0.79 
  -4   3   0    7.84    0.87 
  -4   0   0   96.64    2.92 
   0   4   0   99.70    2.40 
   0  -4   0   96.00    2.88 
   4  -4   0   94.89    3.16 
   4   0   0   95.73    2.43 
   0   4   0   96.96    3.24 
   4  -4   0   95.41    2.09 
  -4   4   0   97.48    2.76 
   0  -4   0   96.70    2.57 
   4   0   0   98.95    3.17 
  -4   4   0   90.11    2.86 
   1   4   0  197.15    3.96 
  -5   1   0  201.79    4.48 
  -4   5   0  192.72    4.89 
   5  -1   0  191.31    5.19 
  -4   5   0  200.48    4.64 
   4  -5   0  195.88    5.43 
   4  -5   0  200.73    4.15 
  -1  -4   0  195.35    4.85 
  -1  -4   0  200.49    4.60 
  -5   1   0  197.26    5.03 
   1   4   0  197.87    5.29 
  -5   1   0  197.81    4.00 
  -3   5   0   51.32    2.45 
  -5   2   0   48.35    1.89 
   5  -2   0   53.00    2.37 
  -5   2   0   48.30    1.17 
  -3   5   0   51.08    1.95 
  -2  -3   0   50.03    1.94 
   3  -5   0   49.90    1.75 
   2   3   0   50.40    1.23 
  -5   2   0   49.40    2.08 
  -2  -3   0   50.61    2.03 
  -3   5   0   49.50    2.01 
   2   3   0   48.43    2.20 
   2   3   0   52.52    2.06 
  -5   3   0   50.63    2.12 
   3   2   0   54.74    2.36 
  -2   5   0   48.07    1.90 
  -2   5   0   50.45    2.45 
   3   2   0   50.38    1.95 
   5  -3   0   53.41    2.31 
   3   2   0   56.95    1.32 
  -2   5   0   52.18    1.89 
   2  -5   0   53.12    1.95 
  -3  -2   0   50.25    2.05 
  -5   3   0   50.79    2.06 
  -1   5   0  166.47    3.91 
  -1   5   0  164.97    4.84 
  -4  -1   0  162.93    4.38 
  -5   4   0  167.24    4.36 
  -5   4   0  169.70    4.28 
   5  -4   0  168.82    4.69 
  -4  -1   0  165.44    3.97 
   4   1   0  164.89    4.66 
   1  -5   0  171.35    4.28 
   1  -5   0  165.90    3.86 
  -5   0   0   15.50    1.47 
   5   0   0   17.03    1.74 
   0  -5   0   20.63    1.20 
   5  -5   0   17.14    0.78 
  -5   5   0   16.88    1.23 
  -5   0   0   18.42    1.12 
   0  -5   0   19.57    1.39 
   0   5   0   17.46    1.00 
   5  -5   0   17.04    1.66 
  -5   5   0   18.42    1.38 
   0   5   0   18.40    1.78 
   1   5   0   28.33    1.94 
   5  -6   0   28.24    1.21 
   5  -6   0   29.14    2.02 
   6  -1   0   29.32    1.97 
  -5   6   0   24.14    1.48 
  -6   1   0   27.01    1.17 
  -6   1   0   25.88    1.72 
   1   5   0   24.40    1.09 
  -1  -5   0   24.17    1.46 
  -5   6   0   24.55    1.60 
  -1  -5   0   26.55    1.70 
  -6   1   0   26.43    1.44 
  -4   6   0   90.31    3.11 
  -2  -4   0   92.98    2.96 
  -6   2   0   95.78    2.12 
  -4   6   0   98.76    3.05 
   2   4   0   95.54    2.09 
  -2  -4   0   94.58    3.18 
   6  -2   0   91.51    3.38 
   2   4   0   92.45    3.50 
   4  -6   0   99.16    3.72 
   4  -6   0   92.08    2.66 
  -6   2   0   90.70    2.88 
  -6   2   0   95.45    3.31 
  -6   3   0  123.22    3.58 
  -3  -3   0  129.78    3.70 
  -3   6   0  121.39    4.33 
   3   3   0  128.07    4.14 
  -3   6   0  117.18    3.55 
  -3   6   0  128.28    3.57 
  -6   3   0  120.78    3.74 
  -3  -3   0  115.91    3.59 
   6  -3   0  126.54    4.10 
   3  -6   0  125.77    3.40 
   2  -6   0   79.94    2.75 
  -4  -2   0   81.38    2.75 
  -4  -2   0   83.10    2.93 
  -6   4   0   84.03    2.94 
  -2   6   0   78.96    2.64 
   4   2   0   84.06    3.26 
   6  -4   0   85.14    3.29 
   2  -6   0   83.09    2.54 
  -2   6   0   84.94    3.46 
  -6   4   0   83.64    2.94 
  -5  -1   0   24.14    1.70 
   1  -6   0   21.57    1.27 
   1  -6   0   20.82    1.52 
  -6   5   0   20.43    1.45 
  -6   5   0   20.87    1.56 
  -5  -1   0   23.45    1.34 
   5   1   0   23.10    1.81 
  -1   6   0   22.49    2.07 
  -1   6   0   24.30    1.32 
   6  -5   0   23.26    1.81 
   6   0   0  142.66    4.73 
  -6   0   0  144.70    3.65 
   0   6   0  143.90    3.55 
   6  -6   0  141.16    4.75 
  -6   0   0  149.44    4.51 
  -6   6   0  134.91    4.28 
  -6   6   0  150.52    4.21 
   0  -6   0  139.12    3.78 
   0   6   0  145.68    4.87 
   0  -6   0  145.30    4.36 
  -7   1   0   24.24    2.17 
  -1  -6   0   23.34    1.58 
   7  -1   0   22.78    2.17 
  -6   7   0   21.87    1.56 
   1   6   0   23.10    2.27 
  -6   7   0   19.72    1.85 
   6  -7   0   18.49    2.08 
  -1  -6   0   19.71    1.83 
  -2  -5   0  152.38    4.55 
   5  -7   0  158.15    3.91 
  -5   7   0  155.43    4.60 
   5  -7   0  157.16    5.32 
  -7   2   0  159.73    4.26 
  -7   2   0  155.04    4.77 
   2   5   0  149.59    5.02 
  -5   7   0  151.28    4.38 
  -2  -5   0  159.79    4.34 
   7  -2   0  150.07    4.96 
   3   4   0   60.45    2.98 
  -4   7   0   57.45    3.07 
  -3  -4   0   55.81    2.53 
  -4   7   0   58.67    2.52 
   4  -7   0   56.34    2.22 
  -7   3   0   56.64    2.71 
   7  -3   0   56.48    2.88 
  -7   3   0   61.39    2.51 
  -3  -4   0   59.35    2.52 
  -4   7   0   58.14    2.50 
  -3   7   0   15.79    1.37 
   7  -4   0   16.93    1.89 
   4   3   0   16.15    1.83 
  -4  -3   0   18.17    1.67 
  -3   7   0   13.55    1.37 
  -7   4   0   15.22    1.63 
  -4  -3   0   13.14    1.38 
   3  -7   0   14.79    1.39 
  -3   7   0   15.23    1.94 
  -7   4   0   14.40    1.47 
  -7   5   0  144.26    4.42 
  -5  -2   0  151.53    4.50 
  -2   7   0  142.07    3.97 
  -5  -2   0  145.59    4.07 
   2  -7   0  142.67    3.75 
   2  -7   0  143.57    4.24 
  -7   5   0  138.01    4.30 
   5   2   0  147.00    4.86 
  -2   7   0  132.60    4.90 
   7  -5   0  140.51    4.78 
  -6  -1   0   54.70    2.67 
  -1   7   0   60.20    2.22 
  -7   6   0   47.18    2.39 
  -7   6   0   54.45    2.69 
   6   1   0   47.44    2.70 
   1  -7   0   54.48    2.13 
   7  -6   0   52.44    2.82 
  -6  -1   0   55.10    2.22 
   1  -7   0   52.13    2.54 
  -1   7   0   52.14    3.00 
  -7   7   0   32.70    2.05 
  -7   0   0   35.52    2.37 
  -7   0   0   35.87    1.72 
   0   7   0   34.35    2.52 
   0  -7   0   31.84    1.76 
   7  -7   0   35.27    2.42 
   0  -7   0   32.17    2.15 
   7   0   0   34.58    2.91 
  -7   7   0   32.35    2.13 
  -8   1   0   70.85    3.44 
   1   7   0   61.23    3.48 
   8  -1   0   67.26    3.75 
  -1  -7   0   60.59    3.05 
  -7   8   0   62.42    3.07 
   7  -8   0   65.34    3.59 
  -7   8   0   60.47    2.85 
  -8   2   0   38.44    2.49 
   8  -2   0   36.37    2.67 
  -6   8   0   34.67    2.21 
  -2  -6   0   39.32    2.19 
   6  -8   0   42.20    2.89 
  -2  -6   0   39.74    2.40 
  -6   8   0   43.13    2.36 
   2   6   0   36.90    2.69 
  -3  -5   0   21.24    1.91 
   8  -3   0   18.67    2.05 
   5  -8   0   19.84    2.23 
   3   5   0   22.40    2.45 
  -5   8   0   23.12    2.02 
  -5   8   0   19.51    1.88 
   5  -8   0   19.77    1.45 
  -8   3   0   22.00    1.89 
  -8   3   0   19.17    1.99 
  -3  -5   0   20.10    1.97 
  -8   4   0  131.93    4.56 
   4   4   0  134.18    4.89 
  -8   4   0  133.45    4.27 
  -4   8   0  131.16    5.27 
   4  -8   0  135.91    4.04 
   8  -4   0  138.59    4.87 
  -4  -4   0  130.59    4.32 
  -4  -4   0  142.27    4.39 
  -4   8   0  140.81    4.19 
  -4   8   0  131.41    4.25 
   3  -8   0    5.55    1.07 
   5   3   0    8.22    1.51 
  -3   8   0    6.99    1.13 
   8  -5   0    5.09    1.36 
  -5  -3   0    6.24    1.12 
  -8   5   0    5.57    1.19 
  -3   8   0    6.85    1.63 
  -5  -3   0    5.41    1.21 
  -8   5   0    6.02    1.16 
  -8   6   0   67.34    3.16 
   8  -6   0   69.44    3.45 
  -2   8   0   67.72    3.71 
  -8   6   0   68.65    3.10 
  -2   8   0   74.14    2.76 
   2  -8   0   67.67    3.00 
  -6  -2   0   75.19    2.92 
  -6  -2   0   69.98    3.18 
   6   2   0   74.62    3.61 
   7   1   0  189.69    6.19 
   1  -8   0  187.74    5.57 
  -7  -1   0  190.37    5.85 
  -8   7   0  186.62    5.75 
  -1   8   0  183.99    6.37 
   8  -7   0  188.59    6.19 
  -7  -1   0  188.48    4.97 
  -8   7   0  182.82    5.45 
  -8   0   0   21.62    2.38 
  -8   8   0   21.28    2.16 
  -8   8   0   21.50    2.10 
   0  -8   0   21.28    2.14 
   8   0   0   18.73    2.40 
   8  -8   0   17.54    2.33 
   0   8   0   23.16    2.71 
   9  -1   0   13.77    2.17 
   8  -9   0   13.22    2.16 
   1   8   0   14.71    2.35 
  -1  -8   0   13.40    1.80 
  -8   9   0   14.84    1.91 
  -9   1   0   14.27    1.96 
   2   7   0   30.59    2.90 
  -7   9   0   28.76    2.51 
  -2  -7   0   20.96    2.17 
   9  -2   0   31.44    3.07 
   7  -9   0   28.00    2.95 
  -9   2   0   28.24    2.55 
  -3  -6   0  134.72    4.41 
  -6   9   0  124.57    4.58 
   6  -9   0  144.15    5.58 
   3   6   0  138.26    5.27 
  -9   3   0  133.10    4.87 
  -3  -6   0  126.29    4.62 
   9  -3   0  127.95    5.08 
  -9   3   0  129.37    4.27 
   9  -4   0   15.96    2.09 
   4   5   0   14.46    2.04 
  -4  -5   0   14.85    1.72 
  -4  -5   0   14.37    1.73 
  -9   4   0   12.63    1.60 
  -9   4   0   13.90    1.83 
   5  -9   0   17.00    2.18 
   5  -9   0   13.37    1.49 
  -5   9   0   14.28    1.73 
  -9   5   0   44.44    2.63 
  -4   9   0   42.19    2.46 
  -4   9   0   43.03    3.22 
   5   4   0   44.73    3.02 
  -9   5   0   48.19    2.72 
   9  -5   0   42.52    2.97 
  -5  -4   0   46.99    2.65 
   4  -9   0   50.01    2.54 
  -5  -4   0   49.11    2.64 
  -6  -3   0   73.85    3.39 
  -9   6   0   73.73    3.43 
   6   3   0   77.32    3.84 
  -3   9   0   73.04    3.08 
   3  -9   0   81.16    3.41 
   9  -6   0   76.92    3.85 
  -3   9   0   73.02    4.03 
  -9   6   0   72.10    3.42 
  -6  -3   0   78.00    3.23 
  -9   7   0   39.70    2.66 
   7   2   0   37.49    2.81 
  -9   7   0   40.93    2.59 
  -7  -2   0   42.69    2.72 
   9  -7   0   41.14    2.97 
  -7  -2   0   37.90    2.22 
   2  -9   0   37.17    2.48 
  -2   9   0   40.01    3.12 
  -9   8   0   14.04    1.92 
  -9   8   0   16.45    1.95 
   1  -9   0   13.85    1.81 
   9  -8   0   15.36    2.12 
   8   1   0   17.34    2.37 
  -8  -1   0   18.37    2.28 
  -1   9   0   15.54    2.23 
   9   0   0   83.14    4.26 
  -9   0   0   69.28    3.81 
   0  -9   0   71.68    3.70 
  -9   9   0   79.50    3.92 
   9  -9   0   79.11    4.22 
   0   9   0   77.16    4.41 
 -10   1   0   25.18    2.85 
  -9  10   0   29.98    2.89 
   1   9   0   26.05    3.04 
   9 -10   0   30.79    3.19 
  -1  -9   0   29.72    2.93 
  10  -1   0   27.06    3.08 
   8 -10   0   78.17    4.35 
  -2  -8   0   93.90    4.15 
  -8  10   0   81.74    4.00 
 -10   2   0   80.05    4.14 
   2   8   0   86.85    4.61 
  10  -2   0   81.62    4.36 
   3   7   0   23.28    2.69 
 -10   3   0   26.51    2.76 
  -7  10   0   29.34    2.72 
   7 -10   0   30.60    3.15 
  10  -3   0   32.75    3.15 
  -3  -7   0   30.95    2.77 
  10  -4   0   18.64    2.48 
   6 -10   0   15.99    2.31 
  -6  10   0   19.93    2.20 
  -4  -6   0   17.78    2.06 
   4   6   0   19.38    2.62 
  -4  -6   0   20.59    2.09 
 -10   4   0   16.82    2.22 
 -10   4   0   20.66    2.07 
  -5  10   0   90.18    3.82 
   5 -10   0   87.36    4.65 
  -5  10   0   91.91    4.84 
 -10   5   0   89.38    4.09 
  10  -5   0   91.92    4.43 
  -5  -5   0   93.30    3.90 
   5   5   0   97.90    4.66 
  -5  -5   0   83.21    3.79 
 -10   5   0   95.95    3.97 
   6   4   0   21.46    2.51 
   4 -10   0   27.39    2.39 
  -4  10   0   26.67    2.31 
  -6  -4   0   20.61    2.07 
  10  -6   0   29.12    2.99 
 -10   6   0   24.12    2.36 
 -10   6   0   27.03    2.60 
  -4  10   0   26.36    3.09 
  -6  -4   0   26.22    2.51 
  -3  10   0    4.38    1.57 
  10  -7   0    5.87    1.63 
   7   3   0    4.00    1.34 
  -7  -3   0    3.91    1.37 
   3 -10   0    3.13    1.15 
 -10   7   0    1.33    1.06 
 -10   7   0    3.91    1.31 
  -7  -3   0    2.72    1.00 
  -2  10   0   65.55    4.15 
  10  -8   0   63.10    3.82 
  -8  -2   0   63.81    3.62 
   8   2   0   62.14    3.89 
 -10   8   0   61.88    3.37 
 -10   8   0   68.12    3.67 
   2 -10   0   68.34    3.47 
 -10   9   0    6.24    1.42 
  10  -9   0    6.94    1.83 
   9   1   0    7.79    1.87 
 -10   9   0    8.09    1.72 
  -1  10   0    7.14    1.94 
   1 -10   0    6.60    1.55 
  -9  -1   0    3.76    1.37 
 -10  10   0   21.65    2.55 
  10 -10   0   26.82    3.05 
 -10   0   0   18.27    2.55 
   0 -10   0   18.84    2.35 
  10   0   0   28.22    3.38 
   0  10   0   20.85    2.97 
 -10  11   0   67.63    4.05 
  -1 -10   0   62.01    3.90 
   1  10   0   67.27    4.74 
 -11   1   0   60.95    3.96 
  11  -1   0   60.87    4.36 
  10 -11   0   69.54    4.47 
   9 -11   0   10.80    2.26 
  -2  -9   0    8.68    1.76 
  11  -2   0   10.98    2.37 
   2   9   0    9.90    2.25 
 -11   2   0   10.63    2.18 
  -9  11   0    9.35    1.91 
  11  -3   0   21.60    2.78 
 -11   3   0   21.23    2.64 
  -8  11   0   19.54    2.44 
  -3  -8   0   26.40    2.77 
   8 -11   0   25.16    3.16 
   3   8   0   26.16    3.09 
  11  -4   0   70.68    4.11 
   7 -11   0   60.61    4.11 
 -11   4   0   65.88    3.81 
  -7  11   0   60.59    3.47 
   4   7   0   61.74    3.98 
  -4  -7   0   60.67    3.45 
   5   6   0   34.72    3.48 
  -5  -6   0   33.56    2.88 
  11  -5   0   34.85    3.33 
   6 -11   0   38.87    3.67 
 -11   5   0   37.15    3.29 
 -11   5   0   39.33    2.74 
  -5  -6   0   32.12    2.91 
  -6  11   0   38.31    2.72 
  -5  11   0   19.05    2.22 
  11  -6   0   19.91    2.69 
  -5  11   0   25.56    3.32 
  -6  -5   0   23.63    2.46 
 -11   6   0   24.40    2.70 
 -11   6   0   22.45    2.50 
   6   5   0   25.07    3.02 
  -6  -5   0   27.18    2.61 
  -4  11   0   70.70    4.65 
 -11   7   0   78.74    3.91 
  11  -7   0   70.16    4.22 
   4 -11   0   82.14    3.81 
  -7  -4   0   70.36    3.61 
   7   4   0   80.46    4.44 
 -11   7   0   75.76    3.92 
  -7  -4   0   71.64    3.80 
   8   3   0   29.02    3.34 
   3 -11   0   24.06    2.55 
  11  -8   0   22.19    2.87 
 -11   8   0   23.65    2.51 
  -3  11   0   20.33    3.04 
 -11   8   0   20.27    2.53 
  -8  -3   0   26.25    2.83 
  11  -9   0   24.48    3.05 
   9   2   0   23.26    3.02 
 -11   9   0   28.19    2.91 
   2 -11   0   26.64    2.82 
  -2  11   0   26.92    3.33 
 -11   9   0   24.79    2.75 
  -9  -2   0   25.37    2.85 
 -10  -1   0   60.44    4.00 
 -11  10   0   59.88    3.82 
  -1  11   0   60.47    4.47 
  11 -10   0   62.04    4.17 
  10   1   0   64.22    4.30 
   1 -11   0   63.60    3.83 
 -11  11   0   24.50    3.00 
   0  11   0   26.47    3.65 
 -11   0   0   27.31    3.18 
  11 -11   0   24.90    3.20 
   0 -11   0   23.36    2.96 
  11   0   0   22.90    3.14 
  10 -12   0    2.98    1.81 
   2  10   0    2.90    1.90 
 -10  12   0    3.57    1.65 
   9 -12   0   55.71    4.36 
   3   9   0   53.28    4.10 
  12  -3   0   60.24    4.52 
  -3  -9   0   54.79    3.68 
  -9  12   0   49.92    3.51 
 -12   3   0   53.44    3.86 
 -12   4   0    9.38    1.98 
   8 -12   0    4.45    1.83 
  -4  -8   0    5.64    1.64 
   4   8   0   12.76    2.65 
  12  -4   0    8.01    2.20 
  -8  12   0   12.46    2.14 
   7 -12   0   12.78    2.41 
  -7  12   0   13.83    2.10 
   5   7   0   15.94    2.59 
  -5  -7   0   13.65    2.06 
 -12   5   0   12.32    2.21 
  12  -5   0   15.70    2.58 
 -12   6   0   66.18    3.97 
  -6  12   0   70.53    3.76 
  -6  -6   0   70.79    3.88 
  12  -6   0   62.27    4.15 
   6 -12   0   64.96    4.38 
 -12   6   0   61.21    3.66 
   6   6   0   70.70    4.59 
 -12   7   0   13.92    2.19 
  -7  -5   0   15.32    2.16 
  12  -7   0   14.77    2.45 
 -12   7   0   16.30    2.47 
  -5  12   0   13.84    2.66 
  -7  -5   0   11.96    2.07 
   7   5   0   14.08    2.49 
  -8  -4   0   22.29    2.80 
  12  -8   0   24.51    3.16 
 -12   8   0   22.82    2.81 
 -12   8   0   24.51    2.85 
  -4  12   0   21.98    3.22 
   8   4   0   18.09    2.67 
   4 -12   0   27.27    2.81 
  12  -9   0   67.08    4.45 
   3 -12   0   52.24    3.50 
  -9  -3   0   53.99    3.78 
 -12   9   0   58.59    3.74 
 -12   9   0   58.86    3.79 
   9   3   0   56.10    4.30 
  -3  12   0   60.38    4.67 
   2 -12   0    7.51    1.86 
 -10  -2   0    7.29    2.09 
  -2  12   0    7.35    2.32 
  12 -10   0    8.91    2.23 
 -12  10   0    7.80    1.99 
   8 -13   0   49.40    4.68 
  -8  13   0   49.98    3.61 
 -13   6   0    3.41    1.69 
   7 -13   0    5.31    1.85 
  -6  -7   0    6.59    1.75 
  -7  13   0    5.43    1.65 
   6 -13   0    9.27    2.29 
 -13   7   0   14.26    2.49 
  -7  -6   0   10.06    2.04 
 -13   8   0   53.14    3.86 
  -5  13   0   42.49    4.63 
 -13   8   0   52.74    3.71 
  -8  -5   0   50.28    3.64 
 -13   9   0   14.89    2.46 
  -9  -4   0    9.85    2.28 
   0   0  -1   -0.77    0.13 
   0   0  -1   -0.36    0.19 
  -1   0  -1  366.83    6.20 
   0   1  -1  369.64    6.33 
   1  -1  -1  356.31    6.75 
  -1   1  -1  358.84    6.43 
  -1   1  -1  359.99    6.45 
   0  -1  -1  355.96    6.11 
   0  -1  -1  362.31    6.33 
   0   1  -1  363.43    6.21 
   1   0  -1  364.89    6.64 
   1  -1  -1  359.95    6.18 
  -1   1  -1  355.60    6.10 
   0   1  -1  360.52    6.57 
  -1   0  -1  362.21    6.41 
   1   0  -1  368.59    6.24 
  -1   1   1  368.34    6.44 
   0  -1   1  367.76    6.48 
   1  -1   1  364.10    6.55 
   0   1   1  364.67    6.69 
  -1   0   1  365.50    6.45 
   1   0   1  365.01    6.59 
   0   1   1  358.29    6.35 
  -1   1   1  364.89    6.23 
  -1   0   1  359.34    6.19 
  -1   2  -1   23.27    0.95 
   1   1  -1   24.70    1.13 
   2  -1  -1   24.31    1.18 
  -2   1  -1   24.02    1.01 
   1   1  -1   23.99    1.01 
   2  -1  -1   23.65    0.72 
  -1   2  -1   23.14    1.08 
   1  -2  -1   23.88    0.91 
  -1   2  -1   24.01    1.14 
  -2   1  -1   24.68    0.64 
  -1  -1  -1   24.84    0.96 
  -2   1  -1   22.86    1.04 
  -1  -1  -1   23.60    0.89 
  -1   2  -1   24.84    0.92 
  -2   1   1   24.65    1.01 
  -1  -1   1   24.30    1.01 
   2  -1   1   24.88    1.07 
   1   1   1   25.20    1.11 
  -1   2   1   25.26    0.76 
  -1   2   1   26.51    1.30 
  -2   1   1   25.45    0.95 
  -1   2   1   24.35    1.00 
   2  -2  -1   33.49    1.48 
   0  -2  -1   35.70    1.00 
   2   0  -1   33.80    1.12 
  -2   0  -1   34.35    1.07 
   0   2  -1   32.79    1.33 
   2   0  -1   37.21    1.48 
  -2   2  -1   33.20    1.32 
   2  -2  -1   34.51    0.99 
  -2   0  -1   32.00    1.25 
  -2   2  -1   35.50    0.91 
   0  -2  -1   34.24    1.27 
   0   2  -1   32.93    1.25 
   0   2  -1   33.60    0.99 
  -2   2  -1   34.87    1.27 
  -2   0   1   36.00    1.00 
   0   2   1   35.74    1.13 
   2   0   1   33.41    1.35 
   0  -2   1   33.03    1.25 
   0   2   1   34.57    1.46 
  -2   0   1   34.97    1.33 
   2  -2   1   35.45    1.39 
  -2   2   1   33.54    1.30 
  -2   2   1   36.03    1.12 
   1   2  -1  140.74    3.56 
  -2   3  -1  141.64    2.98 
   1   2  -1  147.88    3.35 
  -1  -2  -1  143.59    3.10 
  -2   3  -1  141.57    3.33 
  -3   1  -1  144.42    3.41 
   2  -3  -1  141.95    3.03 
   1   2  -1  146.01    2.55 
  -1  -2  -1  142.49    3.30 
  -2   3  -1  145.79    3.33 
  -3   1  -1  143.89    2.70 
   3  -1  -1  145.07    2.80 
   3  -1  -1  147.68    3.63 
  -3   1  -1  140.79    3.21 
  -2   3  -1  132.83    3.54 
  -2   3   1  142.30    3.79 
  -2   3   1  146.19    2.98 
   3  -1   1  145.07    3.51 
  -2   3   1  135.61    3.30 
  -3   1   1  143.04    3.38 
  -1  -2   1  142.70    3.32 
   1   2   1  144.24    3.61 
   1   2   1  145.67    2.92 
  -3   1   1  145.93    3.15 
  -3   2  -1  539.35    9.91 
   3  -2  -1  549.03    9.02 
   2   1  -1  531.12    9.57 
   1  -3  -1  523.92    9.60 
  -1   3  -1  509.94   10.29 
  -1   3  -1  524.21    9.60 
  -3   2  -1  536.07    9.85 
   2   1  -1  535.88   10.29 
   3  -2  -1  538.45   10.41 
  -1   3  -1  535.96    9.61 
  -2  -1  -1  534.00    9.55 
  -1   3  -1  533.51    9.89 
  -2  -1  -1  527.69    9.75 
   3  -2   1  543.70   10.23 
  -1   3   1  529.71    9.29 
  -3   2   1  538.98    9.79 
  -1   3   1  530.58   10.47 
   2   1   1  533.53   10.25 
  -1   3   1  521.42    9.65 
  -3   2   1  544.53    9.79 
  -2  -1   1  538.57    9.91 
   0  -3  -1   23.48    0.91 
   3  -3  -1   22.67    1.40 
  -3   0  -1   23.12    1.18 
   0   3  -1   22.94    0.87 
   3   0  -1   22.22    0.95 
  -3   3  -1   22.95    0.74 
  -3   3  -1   22.83    1.22 
   3   0  -1   22.51    1.31 
   0  -3  -1   23.63    1.18 
   0   3  -1   22.67    1.26 
  -3   3  -1   22.39    1.10 
  -3   0  -1   22.62    0.92 
   3  -3  -1   22.60    0.80 
   0   3   1   21.75    1.34 
  -3   3   1   21.92    1.01 
   0   3   1   23.36    0.96 
  -3   0   1   21.47    0.85 
   0  -3   1   19.93    1.05 
   3   0   1   23.37    1.29 
   3  -3   1   21.80    1.24 
  -3   0   1   21.56    1.15 
  -3   3   1   20.28    1.15 
   1   3  -1  198.16    4.83 
  -3   4  -1  189.59    4.47 
   4  -1  -1  189.19    4.81 
  -3   4  -1  192.79    3.92 
  -1  -3  -1  188.03    4.44 
   1   3  -1  191.15    4.48 
   1   3  -1  192.76    3.56 
  -4   1  -1  191.93    4.59 
  -3   4  -1  191.76    4.40 
   3  -4  -1  199.01    3.99 
   3  -4  -1  186.59    5.03 
  -4   1  -1  192.88    4.26 
   4  -1  -1  189.04    3.77 
  -4   1  -1  200.50    3.72 
  -1  -3  -1  195.84    4.14 
  -3   4   1  195.06    4.10 
  -1  -3   1  190.49    4.38 
   3  -4   1  188.28    4.82 
   1   3   1  190.12    4.85 
   4  -1   1  184.88    4.66 
  -4   1   1  188.67    4.52 
  -4   1   1  191.93    4.11 
  -3   4   1  189.78    4.48 
   1   3   1  197.48    3.89 
   2   2  -1    0.52    0.46 
  -2   4  -1    0.72    0.51 
   2   2  -1    0.50    0.51 
  -2   4  -1    0.99    0.38 
  -2   4  -1    1.22    0.60 
   4  -2  -1    0.92    0.23 
  -4   2  -1    0.71    0.45 
  -2  -2  -1    1.63    0.49 
  -4   2  -1    0.18    0.44 
  -2   4  -1    0.48    0.42 
  -2  -2  -1    0.87    0.45 
   4  -2  -1    0.68    0.55 
   2  -4  -1    0.92    0.38 
  -4   2   1    0.42    0.42 
  -2   4   1    1.20    0.43 
  -2   4   1    0.20    0.40 
  -2  -2   1    1.16    0.47 
  -2   4   1    0.77    0.59 
  -4   2   1    0.73    0.44 
   2   2   1    0.60    0.48 
   2   2   1    1.21    0.33 
   4  -2   1    1.25    0.50 
   4  -3  -1  309.09    6.89 
  -4   3  -1  306.62    6.40 
  -3  -1  -1  297.08    6.31 
   1  -4  -1  302.98    5.73 
  -3  -1  -1  298.38    6.02 
   1  -4  -1  310.60    6.23 
   4  -3  -1  304.78    5.41 
   3   1  -1  304.40    6.79 
  -1   4  -1  316.48    6.06 
   3   1  -1  295.27    6.08 
  -1   4  -1  302.79    6.88 
  -4   3  -1  307.45    6.44 
  -1   4  -1  293.89    6.17 
  -1   4   1  299.34    6.07 
   4  -3   1  304.29    6.67 
   1  -4   1  303.85    6.21 
  -1   4   1  300.40    6.92 
  -3  -1   1  297.82    6.43 
   3   1   1  301.54    6.71 
  -4   3   1  309.66    6.25 
  -4   3   1  297.52    6.34 
  -4   0  -1  113.41    3.36 
   4   0  -1  121.79    3.66 
   4   0  -1  124.89    2.96 
   0  -4  -1  124.22    3.36 
   4  -4  -1  122.84    2.60 
   0  -4  -1  124.04    2.88 
  -4   4  -1  120.33    3.40 
   4  -4  -1  113.79    3.73 
   0   4  -1  116.68    3.28 
   0   4  -1  121.90    3.64 
  -4   0  -1  118.56    2.83 
  -4   4  -1  115.79    3.24 
   0   4  -1  126.39    2.79 
  -4   4   1  118.17    3.38 
   0   4   1  119.67    2.89 
   0  -4   1  124.28    3.17 
  -4   0   1  126.16    2.78 
   0   4   1  116.84    3.63 
   4  -4   1  123.16    3.62 
  -4   4   1  117.98    3.10 
   4  -4   1  120.28    2.48 
   4   0   1  120.09    3.57 
  -4   5  -1    0.39    0.46 
  -1  -4  -1    0.53    0.41 
  -4   5  -1    0.99    0.54 
   4  -5  -1    0.20    0.32 
   1   4  -1   -0.37    0.45 
  -5   1  -1   -0.29    0.49 
   1   4  -1    0.09    0.24 
   5  -1  -1   -0.20    0.31 
   4  -5  -1   -0.23    0.62 
  -1  -4  -1    0.88    0.57 
  -5   1  -1   -0.13    0.26 
   1   4  -1    0.13    0.49 
   5  -1  -1    0.31    0.59 
   4  -5   1    0.52    0.59 
   1   4   1    0.58    0.34 
  -4   5   1    0.51    0.41 
   4  -5   1    0.35    0.32 
  -4   5   1   -0.12    0.41 
  -5   1   1    0.60    0.55 
  -1  -4   1    0.72    0.50 
   5  -1   1    0.74    0.65 
  -5   1   1    0.41    0.40 
   1   4   1    0.38    0.60 
  -2  -3  -1  182.05    4.52 
   2   3  -1  189.50    4.59 
  -3   5  -1  185.29    4.56 
  -5   2  -1  188.72    4.77 
   5  -2  -1  186.76    3.53 
  -3   5  -1  189.97    4.65 
  -2  -3  -1  189.78    4.38 
   3  -5  -1  181.48    4.16 
   5  -2  -1  183.80    5.04 
  -5   2  -1  188.79    4.49 
   2   3  -1  190.00    5.03 
  -5   2  -1  190.63    3.38 
  -3   5  -1  184.11    5.13 
  -5   2   1  178.82    4.62 
  -3   5   1  187.78    4.23 
  -5   2   1  185.47    4.37 
  -3   5   1  176.54    5.23 
  -2  -3   1  178.49    4.50 
   5  -2   1  184.95    4.92 
  -3   5   1  183.78    4.56 
   3  -5   1  184.41    4.15 
   2   3   1  184.26    5.00 
   2   3   1  188.19    3.74 
   3   2  -1  103.14    3.02 
  -2   5  -1  109.08    2.99 
  -5   3  -1  107.07    3.23 
  -3  -2  -1  104.81    3.08 
  -2   5  -1  107.33    3.15 
  -5   3  -1  104.59    3.16 
   2  -5  -1  105.28    3.03 
   5  -3  -1  104.78    3.54 
  -2   5  -1  103.15    3.56 
   3   2  -1  108.87    3.49 
  -2   5  -1  106.21    2.99 
  -3  -2  -1  108.15    3.04 
  -5   3   1  108.93    3.16 
   3   2   1  105.29    3.47 
  -3  -2   1  111.01    3.24 
   3   2   1  111.42    2.59 
  -2   5   1  103.31    2.98 
  -2   5   1  106.54    2.67 
  -2   5   1  106.99    3.74 
  -5   3   1  105.69    3.12 
   5  -3   1  105.51    3.40 
  -4  -1  -1    8.99    0.92 
  -1   5  -1    8.83    0.90 
   4   1  -1   10.33    1.01 
  -1   5  -1    9.61    1.08 
  -4  -1  -1   10.39    1.15 
   5  -4  -1   12.15    1.45 
   1  -5  -1    9.34    1.06 
   5  -4  -1    9.47    0.60 
   1  -5  -1   10.37    0.85 
  -5   4  -1   11.68    1.23 
  -1   5  -1    7.58    1.16 
   4   1  -1    8.58    1.18 
  -5   4  -1   11.55    1.18 
  -1   5   1    9.31    1.31 
  -5   4   1   10.67    1.09 
  -5   4   1   12.12    1.25 
   5  -4   1   10.22    1.23 
  -1   5   1   12.71    1.07 
   1  -5   1    9.06    0.97 
  -4  -1   1    9.77    1.12 
   4   1   1   12.31    1.39 
   0  -5  -1  191.02    4.17 
  -5   5  -1  175.06    4.61 
   0   5  -1  178.98    4.68 
  -5   0  -1  176.70    4.82 
   5   0  -1  182.46    4.13 
  -5   0  -1  181.06    4.11 
   0   5  -1  182.34    3.97 
   5  -5  -1  186.43    3.72 
   0  -5  -1  182.36    4.70 
   5   0  -1  179.91    5.12 
   0   5  -1  186.38    5.20 
  -5   5  -1  181.94    4.81 
   5  -5  -1  173.18    5.19 
  -5   5   1  185.35    4.48 
   5   0   1  178.91    5.03 
  -5   5   1  176.48    4.78 
   0   5   1  183.78    4.14 
   5  -5   1  187.56    3.58 
   5  -5   1  181.32    5.10 
   0  -5   1  182.13    4.43 
   0   5   1  182.96    5.26 
  -5   0   1  176.22    4.82 
  -5   0   1  180.79    3.96 
   1   5  -1  113.65    3.98 
   5  -6  -1  104.31    4.03 
   1   5  -1  109.36    3.57 
  -6   1  -1  108.30    2.71 
   6  -1  -1  109.99    2.76 
  -5   6  -1  113.07    3.61 
  -6   1  -1  110.43    3.69 
   5  -6  -1  109.81    2.82 
  -1  -5  -1  104.36    3.49 
   1   5  -1  109.92    2.53 
  -5   6  -1  108.00    3.42 
   6  -1  -1  104.25    3.79 
  -1  -5  -1  111.56    3.12 
  -5   6   1  105.58    3.17 
   5  -6   1  108.69    2.72 
  -6   1   1  107.53    3.63 
   1   5   1  107.39    2.75 
  -1  -5   1  103.53    3.29 
  -6   1   1  110.40    3.04 
   5  -6   1  107.41    3.84 
   6  -1   1  109.94    3.84 
   1   5   1  112.26    3.99 
  -5   6   1  109.77    3.63 
   2   4  -1   55.14    2.64 
  -4   6  -1   51.42    2.22 
  -4   6  -1   49.51    2.23 
   6  -2  -1   55.27    2.61 
   2   4  -1   54.95    2.35 
  -6   2  -1   54.76    2.15 
   4  -6  -1   50.88    1.88 
   4  -6  -1   52.23    2.70 
  -6   2  -1   56.22    1.42 
  -2  -4  -1   57.19    2.38 
  -6   2  -1   54.30    2.45 
  -2  -4  -1   52.01    2.08 
   6  -2  -1   54.58    1.49 
  -6   2   1   54.04    2.10 
   4  -6   1   56.60    1.94 
  -2  -4   1   53.96    2.26 
  -6   2   1   50.07    2.35 
   2   4   1   52.44    1.55 
  -4   6   1   50.10    2.26 
  -4   6   1   55.57    2.06 
   4  -6   1   50.95    2.59 
   6  -2   1   51.13    2.46 
   2   4   1   57.70    2.70 
  -3  -3  -1    6.51    0.98 
   6  -3  -1    8.72    1.35 
  -6   3  -1    6.47    0.96 
  -3  -3  -1    4.24    0.80 
  -3   6  -1    6.30    0.92 
   3   3  -1    6.27    0.96 
   3   3  -1    5.19    1.02 
  -6   3  -1    5.35    0.96 
  -3   6  -1    7.23    1.29 
  -3   6  -1    4.64    0.89 
   3  -6  -1    7.09    0.95 
   3   3   1    6.70    1.21 
  -3  -3   1    5.89    1.01 
  -3   6   1    6.63    0.95 
   6  -3   1    4.84    0.99 
  -6   3   1    5.61    0.92 
  -3   6   1    7.40    0.95 
   3  -6   1    6.80    0.89 
  -3   6   1    9.20    1.48 
  -6   3   1    8.35    1.07 
   3   3   1    6.34    0.57 
   6  -4  -1   48.40    2.42 
  -4  -2  -1   49.86    2.18 
  -2   6  -1   39.97    2.37 
  -2   6  -1   44.55    1.89 
   2  -6  -1   45.70    1.62 
  -6   4  -1   43.11    2.11 
   2  -6  -1   45.86    2.06 
  -4  -2  -1   40.35    1.88 
   4   2  -1   45.98    2.39 
   4   2  -1   46.06    2.01 
  -6   4  -1   46.68    2.15 
  -6   4   1   43.30    2.10 
  -4  -2   1   43.38    2.17 
  -2   6   1   46.01    2.56 
   2  -6   1   45.72    2.02 
  -2   6   1   43.46    1.94 
   6  -4   1   43.44    2.26 
  -6   4   1   43.96    2.06 
   4   2   1   44.12    2.29 
   2  -6   1   44.77    1.91 
  -5  -1  -1  111.23    3.65 
  -6   5  -1  108.04    3.67 
   5   1  -1  112.74    4.03 
  -6   5  -1  117.64    3.69 
  -1   6  -1  118.01    3.17 
   1  -6  -1  115.62    2.99 
   5   1  -1  118.48    3.32 
  -5  -1  -1  118.09    3.26 
  -1   6  -1  119.68    4.22 
   1  -6  -1  114.63    3.58 
   6  -5  -1  115.08    4.10 
  -1   6   1  116.29    4.17 
  -6   5   1  117.62    3.75 
   1  -6   1  117.65    3.63 
  -5  -1   1  113.39    3.76 
  -1   6   1  113.28    3.22 
   6  -5   1  117.31    3.93 
   1  -6   1  114.71    3.30 
   5   1   1  111.13    3.90 
  -6   5   1  112.98    3.48 
  -6   6  -1   -0.09    0.52 
   0  -6  -1    0.62    0.66 
   6   0  -1    0.39    0.75 
   6  -6  -1    1.57    0.92 
   0   6  -1    0.43    0.38 
   6   0  -1    0.09    0.43 
   0   6  -1   -0.15    0.69 
  -6   0  -1   -0.29    0.64 
  -6   0  -1    0.86    0.46 
   0  -6  -1   -0.16    0.39 
  -6   6  -1   -0.36    0.63 
  -6   0   1    1.94    0.80 
  -6   6   1    0.26    0.57 
   0  -6   1   -0.12    0.46 
   0   6   1   -0.08    0.62 
   0   6   1    0.08    0.39 
   0  -6   1   -0.10    0.59 
   6  -6   1    0.42    0.72 
   6   0   1    0.71    0.84 
  -6   6   1   -0.35    0.45 
  -6   7  -1   92.04    3.34 
   7  -1  -1   87.23    3.77 
  -1  -6  -1   95.02    3.54 
  -6   7  -1   85.42    3.42 
  -1  -6  -1   90.46    2.93 
   1   6  -1   92.41    3.90 
   6  -7  -1   88.56    3.96 
  -7   1  -1   90.54    3.57 
   1   6   1   93.14    3.97 
  -7   1   1   97.22    3.72 
  -1  -6   1   91.13    3.16 
   6  -7   1   91.95    3.79 
  -6   7   1   92.56    3.16 
  -1  -6   1   92.05    3.49 
  -7   1   1   92.84    2.89 
   7  -1   1   91.17    3.81 
  -6   7   1   88.15    3.44 
   7  -2  -1    1.81    0.99 
  -5   7  -1    1.62    0.74 
   2   5  -1    2.95    0.88 
  -5   7  -1    1.56    0.72 
  -2  -5  -1    3.38    0.94 
   5  -7  -1    1.40    0.51 
  -2  -5  -1    1.64    0.68 
  -7   2  -1    1.94    0.83 
   2   5  -1    3.09    1.14 
   5  -7  -1    2.58    1.04 
   5  -7   1    2.56    0.62 
  -5   7   1    1.50    0.80 
  -7   2   1    2.61    0.75 
   5  -7   1    2.76    1.07 
  -5   7   1    2.30    0.73 
   7  -2   1    1.24    0.85 
   2   5   1    2.21    0.93 
  -7   2   1    2.42    0.89 
  -2  -5   1    2.48    0.78 
  -2  -5   1    1.97    0.74 
  -4   7  -1  125.40    4.09 
  -4   7  -1  137.20    4.68 
   3   4  -1  125.44    4.46 
   3   4  -1  130.11    4.03 
   4  -7  -1  128.10    3.63 
  -4   7  -1  125.76    3.95 
  -3  -4  -1  129.33    3.82 
  -7   3  -1  124.78    4.14 
  -7   3  -1  122.28    3.85 
  -3  -4  -1  131.49    4.05 
   7  -3  -1  134.95    4.61 
   7  -3   1  128.86    4.35 
  -4   7   1  122.48    4.72 
   4  -7   1  128.92    3.58 
  -7   3   1  122.21    3.74 
  -4   7   1  129.45    3.97 
   3   4   1  123.45    4.41 
  -3  -4   1  122.34    3.91 
  -4   7   1  119.42    3.66 
  -7   3   1  130.47    4.20 
   7  -4  -1  156.30    5.01 
  -4  -3  -1  156.73    4.38 
  -7   4  -1  153.22    4.55 
  -3   7  -1  139.83    5.03 
  -4  -3  -1  152.18    4.39 
   4   3  -1  152.60    4.35 
  -7   4  -1  150.25    4.61 
  -3   7  -1  151.48    4.24 
   3  -7  -1  150.95    4.22 
   4   3  -1  151.36    4.94 
  -3   7  -1  159.13    4.36 
  -7   4   1  146.55    4.39 
   4   3   1  154.37    4.95 
  -3   7   1  153.86    5.34 
   7  -4   1  149.18    4.79 
  -3   7   1  151.23    3.79 
  -3   7   1  157.75    4.36 
  -4  -3   1  149.54    4.49 
   3  -7   1  148.28    4.19 
  -7   4   1  153.28    4.55 
  -7   5  -1    0.46    0.66 
  -2   7  -1   -0.05    0.42 
  -2   7  -1    1.05    0.86 
   7  -5  -1    0.78    0.85 
  -7   5  -1    0.05    0.63 
   5   2  -1   -0.29    0.68 
  -5  -2  -1   -0.33    0.46 
   5   2  -1    0.14    0.52 
   2  -7  -1    0.63    0.61 
  -5  -2  -1    1.04    0.71 
   2  -7   1   -0.74    0.48 
   2  -7   1    0.04    0.46 
   7  -5   1    0.76    0.79 
  -7   5   1    0.51    0.67 
  -2   7   1    0.05    0.48 
   5   2   1   -0.51    0.59 
  -7   5   1    0.17    0.44 
  -5  -2   1   -0.09    0.67 
  -2   7   1   -0.31    0.82 
  -7   6  -1  147.24    4.49 
  -6  -1  -1  141.78    4.59 
   7  -6  -1  143.67    5.01 
  -1   7  -1  150.15    3.87 
   1  -7  -1  140.32    4.44 
  -7   6  -1  146.96    4.62 
  -6  -1  -1  149.56    4.05 
  -1   7  -1  133.97    4.97 
   6   1  -1  145.58    4.97 
  -7   6   1  148.80    4.39 
   6   1   1  145.17    4.91 
   1  -7   1  138.10    4.37 
  -6  -1   1  148.47    4.04 
  -1   7   1  141.10    3.92 
   1  -7   1  145.51    4.01 
  -1   7   1  140.49    5.15 
   7  -6   1  143.54    4.82 
  -7   6   1  140.69    4.54 
  -6  -1   1  154.90    4.78 
  -7   0  -1   68.53    2.51 
  -7   7  -1   72.07    3.05 
  -7   0  -1   68.46    3.21 
  -7   7  -1   75.18    3.24 
   7  -7  -1   73.22    3.63 
   0   7  -1   69.86    3.50 
   7   0  -1   69.59    3.51 
   0  -7  -1   72.45    3.14 
  -7   0   1   69.54    2.50 
  -7   7   1   70.84    2.91 
   0  -7   1   75.86    3.19 
  -7   0   1   73.00    3.26 
   0   7   1   75.05    3.67 
  -7   7   1   65.14    3.14 
   7   0   1   66.55    3.37 
   7  -7   1   69.64    3.36 
   0  -7   1   72.21    2.73 
  -8   1  -1    2.43    1.02 
   1   7  -1    3.30    1.24 
  -7   8  -1    1.86    0.87 
  -7   8  -1    3.10    1.00 
   8  -1  -1    3.22    1.51 
  -1  -7  -1    0.02    0.75 
   7  -8  -1    1.37    1.13 
   8  -1   1    4.44    1.67 
  -7   8   1    1.52    0.80 
  -8   1   1    1.64    0.92 
   7  -8   1    1.74    1.13 
  -7   8   1    1.63    0.97 
  -1  -7   1    3.02    1.02 
  -1  -7   1    2.11    0.85 
   1   7   1    0.41    0.96 
  -2  -6  -1  106.20    3.48 
   6  -8  -1  101.05    4.46 
  -2  -6  -1  107.52    3.93 
   2   6  -1   99.54    4.35 
  -6   8  -1   94.45    3.69 
  -8   2  -1   98.33    4.02 
   8  -2  -1  102.45    4.30 
  -6   8  -1  105.20    3.92 
   6  -8   1  100.12    4.26 
  -2  -6   1   96.33    3.54 
  -8   2   1   96.89    4.00 
   2   6   1  104.01    4.37 
  -8   2   1   98.68    3.32 
  -6   8   1   99.85    3.87 
  -2  -6   1  106.77    3.91 
   8  -2   1   98.06    4.14 
   8  -3  -1  141.89    5.08 
   3   5  -1  141.21    5.07 
   5  -8  -1  132.80    5.22 
  -3  -5  -1  136.46    4.18 
  -8   3  -1  138.17    4.77 
   5  -8  -1  138.18    3.90 
  -5   8  -1  138.61    4.45 
  -8   3  -1  141.78    4.33 
  -5   8  -1  133.42    4.54 
  -3  -5  -1  133.14    4.46 
   3   5   1  134.43    5.00 
   5  -8   1  144.72    5.18 
  -3  -5   1  137.63    4.51 
  -8   3   1  140.30    4.20 
  -3  -5   1  140.50    4.40 
  -8   3   1  130.94    4.57 
   5  -8   1  116.98    3.72 
   8  -3   1  139.39    4.87 
  -5   8   1  136.30    4.47 
  -4  -4  -1    0.95    0.77 
  -8   4  -1    1.30    0.85 
   4  -8  -1    0.35    0.56 
  -4   8  -1    0.57    0.67 
  -4   8  -1   -1.83    0.82 
   4   4  -1    0.76    0.99 
  -8   4  -1    0.71    0.72 
  -4  -4  -1   -0.29    0.63 
   8  -4  -1   -0.45    0.92 
  -4   8  -1    1.02    0.76 
   8  -4   1    0.77    0.81 
  -8   4   1    0.77    0.69 
  -4   8   1   -0.38    0.94 
   4   4   1    0.56    0.84 
   4  -8   1   -0.36    0.49 
  -4   8   1    0.08    0.67 
  -4  -4   1   -0.48    0.51 
  -4  -4   1   -0.77    0.66 
  -8   4   1   -0.58    0.69 
   5   3  -1   89.90    3.93 
  -8   5  -1   86.83    3.53 
  -5  -3  -1   91.35    3.33 
  -5  -3  -1   88.52    3.41 
   8  -5  -1   86.36    3.96 
  -3   8  -1   87.81    4.18 
   3  -8  -1   81.78    3.23 
  -3   8  -1   88.51    3.23 
  -8   5  -1   84.75    3.49 
  -5  -3   1   96.86    3.66 
  -3   8   1   81.05    4.07 
  -8   5   1   83.75    3.38 
  -8   5   1   85.29    3.48 
  -3   8   1   90.78    3.31 
   8  -5   1   90.51    3.86 
   3  -8   1   87.22    3.25 
   5   3   1   89.47    3.93 
   3  -8   1   90.60    3.22 
  -5  -3   1   86.50    3.30 
  -6  -2  -1  111.26    3.67 
   8  -6  -1  108.65    4.44 
  -2   8  -1  107.49    4.62 
  -6  -2  -1  111.32    4.06 
  -2   8  -1  108.42    3.47 
  -8   6  -1  107.41    4.03 
  -8   6  -1  105.14    4.01 
   2  -8  -1  113.41    3.96 
   6   2  -1  106.92    4.39 
  -8   6   1  107.29    3.86 
  -6  -2   1  111.68    4.16 
  -6  -2   1  110.01    3.69 
  -2   8   1  116.49    4.79 
   8  -6   1  105.48    4.26 
   6   2   1  106.05    4.33 
  -8   6   1  110.38    4.09 
   2  -8   1  114.42    3.94 
  -2   8   1  116.59    3.64 
  -7  -1  -1   -0.26    0.71 
   1  -8  -1    0.54    0.76 
   7   1  -1    0.33    0.95 
  -8   7  -1    0.53    0.80 
   8  -7  -1    0.11    0.94 
  -8   7  -1   -0.05    0.77 
  -7  -1  -1   -0.06    0.60 
  -1   8  -1    1.07    0.90 
  -8   7   1    0.38    0.78 
  -1   8   1   -0.77    0.70 
   1  -8   1   -0.27    0.75 
   8  -7   1   -0.59    0.68 
  -8   7   1   -0.30    0.74 
  -7  -1   1    0.41    0.95 
  -7  -1   1   -0.14    0.54 
   7   1   1    1.67    1.08 
   0   8  -1   44.67    3.11 
  -8   8  -1   50.60    2.92 
   0  -8  -1   49.77    2.93 
  -8   0  -1   46.57    2.85 
   8  -8  -1   49.07    3.24 
   8   0  -1   56.86    3.50 
  -8   8  -1   44.23    2.63 
  -8   8   1   54.59    2.73 
   8   0   1   49.63    3.19 
   0   8   1   54.15    3.49 
   8  -8   1   47.30    3.04 
  -8   0   1   49.34    3.01 
   0  -8   1   46.62    2.77 
  -8   8   1   49.66    2.94 
  -8   9  -1   67.44    3.34 
   8  -9  -1   66.59    3.95 
   1   8  -1   62.14    3.85 
  -9   1  -1   63.02    3.47 
  -8   9  -1   71.46    3.53 
  -1  -8  -1   66.09    3.42 
   9  -1  -1   66.69    3.90 
  -9   1   1   62.40    3.48 
   8  -9   1   63.58    3.62 
   1   8   1   73.77    4.12 
  -1  -8   1   65.24    3.41 
   9  -1   1   69.88    3.91 
  -8   9   1   62.50    3.37 
   9  -2  -1   62.53    3.81 
  -2  -7  -1   62.26    3.24 
   7  -9  -1   58.31    3.66 
  -9   2  -1   60.78    3.41 
  -7   9  -1   57.33    3.13 
  -7   9  -1   66.80    3.22 
   2   7  -1   65.55    3.77 
   7  -9   1   65.94    3.71 
  -2  -7   1   59.29    3.12 
  -2  -7   1   63.74    2.93 
  -7   9   1   62.39    3.26 
   9  -2   1   59.22    3.58 
   2   7   1   63.97    3.64 
  -9   2   1   69.24    3.54 
  -3  -6  -1   -0.21    0.72 
  -6   9  -1    0.63    0.82 
  -3  -6  -1    0.58    0.77 
   9  -3  -1   -0.01    1.01 
   6  -9  -1    2.51    1.37 
  -9   3  -1    0.42    0.83 
   3   6  -1    2.55    1.21 
   9  -3   1    0.95    1.09 
  -6   9   1    0.38    0.82 
  -3  -6   1    2.00    0.95 
  -3  -6   1    0.96    0.76 
   3   6   1    0.55    1.03 
  -9   3   1    0.84    0.80 
   6  -9   1    1.16    1.03 
  -9   3   1    0.28    0.83 
  -5   9  -1   71.22    3.20 
   9  -4  -1   66.16    3.60 
   5  -9  -1   67.97    3.85 
   4   5  -1   65.53    3.68 
  -9   4  -1   66.13    3.08 
  -4  -5  -1   67.91    3.06 
   5  -9  -1   68.24    2.83 
  -4  -5  -1   65.65    3.15 
  -9   4  -1   72.32    3.49 
   5  -9   1   68.43    2.84 
  -4  -5   1   67.92    3.20 
   5  -9   1   62.58    3.58 
   4   5   1   66.83    3.63 
  -9   4   1   69.93    3.09 
  -4  -5   1   74.36    3.26 
   9  -4   1   66.77    3.42 
  -5   9   1   62.36    3.09 
  -9   4   1   67.83    3.33 
  -4   9  -1   35.40    3.19 
  -5  -4  -1   38.46    2.37 
   5   4  -1   40.03    2.90 
   9  -5  -1   40.70    2.94 
  -9   5  -1   34.35    2.44 
  -4   9  -1   39.16    2.33 
  -9   5  -1   33.92    2.37 
   4  -9  -1   32.42    2.11 
  -5  -4  -1   37.76    2.39 
   4  -9   1   35.71    2.15 
  -4   9   1   38.09    2.31 
  -9   5   1   40.98    2.55 
   5   4   1   35.90    2.66 
  -5  -4   1   31.45    2.21 
  -9   5   1   38.78    2.41 
  -4   9   1   42.14    3.19 
  -5  -4   1   37.51    2.44 
   9  -5   1   37.91    2.61 
  -3   9  -1    0.67    0.75 
  -9   6  -1    0.42    0.85 
   3  -9  -1    0.47    0.67 
  -3   9  -1    2.16    1.16 
  -9   6  -1   -0.50    0.77 
  -6  -3  -1   -0.28    0.64 
   9  -6  -1    0.35    0.96 
  -6  -3  -1   -0.49    0.68 
   6   3  -1    0.30    0.84 
  -3   9   1    0.77    0.74 
   9  -6   1    0.95    0.95 
   6   3   1    0.45    0.88 
  -6  -3   1   -0.09    0.86 
  -6  -3   1    0.19    0.65 
  -9   6   1    0.67    0.74 
  -9   6   1    0.39    0.85 
  -3   9   1   -0.69    0.90 
   3  -9   1    0.74    0.78 
   9  -7  -1   54.74    3.48 
  -9   7  -1   54.34    3.05 
   7   2  -1   57.01    3.40 
  -9   7  -1   55.66    3.01 
   2  -9  -1   54.18    2.92 
  -7  -2  -1   56.57    3.12 
  -2   9  -1   56.29    3.62 
  -7  -2  -1   58.23    2.71 
  -2   9   1   52.18    3.56 
  -9   7   1   55.29    2.96 
  -9   7   1   55.73    3.10 
   9  -7   1   59.21    3.37 
   2  -9   1   52.10    2.93 
  -7  -2   1   58.38    2.71 
  -7  -2   1   58.93    3.12 
   7   2   1   57.99    3.46 
  -1   9  -1   46.67    3.35 
  -9   8  -1   45.78    2.87 
   8   1  -1   47.01    3.20 
   1  -9  -1   51.33    2.93 
   9  -8  -1   54.13    3.50 
  -8  -1  -1   50.95    3.09 
  -9   8  -1   61.20    3.28 
  -8  -1   1   54.23    3.23 
  -1   9   1   41.73    3.30 
   9  -8   1   52.05    3.28 
  -9   8   1   49.95    3.05 
   1  -9   1   52.15    2.99 
   8   1   1   50.06    3.21 
  -9   8   1   46.74    2.72 
  -9   9  -1    3.69    1.31 
   9  -9  -1    4.82    1.60 
   0  -9  -1    4.73    1.45 
   9   0  -1    3.63    1.58 
  -9   0  -1    3.42    1.32 
   0   9  -1    0.46    1.21 
  -9   9  -1    1.67    1.08 
  -9   0   1    4.55    1.39 
   9   0   1    3.51    1.46 
   0  -9   1    4.84    1.38 
  -9   9   1    4.74    1.37 
   9  -9   1    5.21    1.56 
   0   9   1    1.64    1.29 
  10  -1  -1   75.67    4.45 
  -1  -9  -1   70.87    3.76 
   9 -10  -1   66.08    4.13 
   1   9  -1   70.41    4.36 
  -9  10  -1   74.60    3.93 
 -10   1  -1   78.63    4.18 
 -10   1   1   69.42    4.02 
  -9  10   1   72.30    3.87 
  10  -1   1   75.53    4.41 
   9 -10   1   75.37    4.33 
  -1  -9   1   75.78    3.90 
   1   9   1   71.84    4.36 
   2   8  -1    1.27    1.20 
   8 -10  -1    0.04    1.21 
  -2  -8  -1   -1.25    0.73 
  -8  10  -1    0.22    0.93 
 -10   2  -1   -0.07    0.87 
  10  -2  -1    0.34    1.43 
   2   8   1    1.95    1.19 
  10  -2   1    0.12    1.37 
 -10   2   1   -0.17    0.88 
  -2  -8   1   -0.06    0.84 
  -8  10   1    0.91    0.96 
   8 -10   1    1.00    1.33 
  -3  -7  -1   55.56    3.21 
 -10   3  -1   55.28    3.36 
  10  -3  -1   54.90    3.69 
  -7  10  -1   50.98    3.06 
   3   7  -1   53.03    3.58 
   7 -10  -1   47.37    3.44 
   7 -10   1   55.32    3.50 
   3   7   1   54.86    3.52 
  10  -3   1   55.52    3.55 
  -7  10   1   48.44    3.00 
 -10   3   1   52.87    3.30 
  -3  -7   1   53.86    3.14 
  10  -4  -1   52.95    3.50 
   6 -10  -1   54.74    3.71 
   4   6  -1   55.60    3.66 
  -6  10  -1   51.73    2.97 
 -10   4  -1   55.07    3.32 
  -4  -6  -1   56.06    3.18 
  -4  -6   1   53.52    3.06 
   4   6   1   55.55    3.54 
 -10   4   1   54.90    3.18 
  -4  -6   1   56.26    3.04 
   6 -10   1   46.33    3.38 
  -6  10   1   56.88    3.18 
 -10   4   1   49.32    2.76 
  10  -4   1   50.25    3.30 
  10  -5  -1    1.10    1.08 
   5   5  -1    1.11    1.22 
   5 -10  -1   -0.79    1.09 
 -10   5  -1    0.28    0.90 
  -5  -5  -1   -0.74    0.78 
  -5  10  -1    0.35    0.90 
  -5  -5  -1    1.97    1.00 
 -10   5  -1   -0.40    0.90 
 -10   5   1   -0.84    0.79 
  10  -5   1   -0.69    0.95 
  -5  10   1    1.38    0.87 
   5   5   1    1.98    1.22 
  -5  -5   1    0.47    0.84 
  -5  10   1    1.42    1.28 
  -5  -5   1    0.85    0.96 
 -10   5   1    0.45    0.84 
   5 -10   1    1.79    1.25 
  -4  10  -1   79.15    4.48 
 -10   6  -1   76.97    3.81 
   6   4  -1   75.95    4.19 
  -6  -4  -1   81.58    3.68 
  10  -6  -1   75.07    4.03 
  -6  -4  -1   74.60    3.46 
   4 -10  -1   84.42    3.54 
 -10   6  -1   82.08    3.76 
  -4  10  -1   83.62    3.52 
  -6  -4   1   75.50    3.72 
   6   4   1   77.92    4.14 
  10  -6   1   77.68    4.02 
  -4  10   1   79.56    4.51 
  -6  -4   1   70.64    3.39 
 -10   6   1   79.24    3.74 
 -10   6   1   79.50    3.67 
   4 -10   1   79.55    3.58 
  -4  10   1   77.81    3.49 
  -7  -3  -1   61.06    3.39 
  -7  -3  -1   61.76    3.02 
 -10   7  -1   52.86    3.17 
 -10   7  -1   59.12    3.28 
  -3  10  -1   55.68    3.91 
   7   3  -1   60.68    3.70 
   3 -10  -1   57.71    3.14 
  10  -7  -1   62.01    3.85 
 -10   7   1   58.79    3.34 
  -7  -3   1   62.34    3.41 
  -3  10   1   64.63    4.22 
  -7  -3   1   56.89    2.98 
   7   3   1   55.95    3.63 
 -10   7   1   56.73    3.19 
  10  -7   1   62.19    3.68 
   3 -10   1   63.91    3.22 
   2 -10  -1    1.01    0.97 
 -10   8  -1    2.57    1.27 
 -10   8  -1    3.63    1.32 
  10  -8  -1    1.74    1.32 
  -2  10  -1    1.29    1.32 
  -8  -2  -1    0.94    1.04 
   8   2  -1    3.80    1.47 
  10  -8   1    0.75    1.15 
 -10   8   1    1.57    1.13 
 -10   8   1    2.71    1.15 
   8   2   1    2.06    1.28 
  -8  -2   1    0.20    0.90 
   2 -10   1    0.81    0.98 
  -2  10   1    4.63    1.57 
   9   1  -1   63.42    4.06 
  10  -9  -1   63.98    4.14 
  -1  10  -1   57.12    4.03 
 -10   9  -1   66.29    3.54 
 -10   9  -1   64.72    3.73 
  -9  -1  -1   66.62    3.72 
   1 -10  -1   61.23    3.52 
 -10   9   1   65.24    3.74 
   1 -10   1   57.37    3.39 
   9   1   1   61.84    3.89 
  10  -9   1   65.59    3.90 
  -1  10   1   61.21    4.08 
  -9  -1   1   60.13    3.75 
 -10   0  -1   51.81    3.51 
 -10  10  -1   50.82    3.47 
   0 -10  -1   41.51    3.52 
  10   0  -1   52.54    3.90 
  10 -10  -1   42.69    3.93 
   0  10  -1   58.25    4.20 
 -10  10   1   52.10    3.51 
 -10   0   1   57.19    3.79 
   0  10   1   40.98    4.04 
  10 -10   1   47.72    3.49 
   0 -10   1   49.54    3.31 
  10   0   1   53.97    3.84 
 -11   1  -1   -0.01    1.39 
  10 -11  -1    0.88    1.48 
  11  -1  -1    0.61    1.44 
 -10  11  -1   -0.29    1.09 
   1  10  -1    0.17    1.49 
  -1 -10  -1   -0.21    1.09 
 -10  11   1    0.94    1.17 
 -11   1   1   -0.87    1.18 
   1  10   1   -0.14    1.35 
  10 -11   1    0.25    1.27 
  -1 -10   1   -0.75    0.99 
  11  -1   1    0.03    1.20 
   9 -11  -1   57.92    4.18 
 -11   2  -1   55.34    3.76 
  -9  11  -1   47.59    3.35 
  11  -2  -1   60.32    4.28 
   2   9  -1   54.11    4.05 
  -2  -9  -1   56.80    3.55 
  11  -2   1   49.31    3.84 
 -11   2   1   67.81    3.97 
   2   9   1   58.61    4.15 
   9 -11   1   48.91    3.74 
  -9  11   1   54.46    3.59 
  -2  -9   1   51.70    3.39 
 -11   3  -1   47.22    3.31 
  -8  11  -1   40.96    2.96 
   3   8  -1   36.84    3.63 
  -3  -8  -1   39.91    3.01 
   8 -11  -1   47.95    4.29 
  11  -3  -1   44.33    4.08 
   8 -11   1   46.73    3.52 
   3   8   1   48.14    3.72 
  -3  -8   1   41.80    3.04 
  -8  11   1   39.88    3.01 
 -11   3   1   39.46    3.52 
  11  -3   1   37.55    3.54 
 -11   4  -1   -0.04    1.06 
  -7  11  -1    1.10    1.00 
  -4  -7  -1   -0.55    0.87 
   7 -11  -1    1.26    1.46 
  11  -4  -1    0.74    1.50 
   4   7  -1    1.15    1.30 
  -7  11   1    0.50    0.98 
   7 -11   1    0.21    1.27 
   4   7   1    1.99    1.22 
  11  -4   1    0.40    1.31 
 -11   4   1   -1.31    0.97 
  -4  -7   1   -0.78    0.83 
   6 -11  -1   38.32    3.72 
   5   6  -1   40.12    3.75 
  -6  11  -1   34.92    2.64 
 -11   5  -1   39.85    3.05 
  11  -5  -1   42.18    3.75 
  -5  -6  -1   42.33    2.93 
 -11   5   1   36.59    3.24 
  11  -5   1   35.67    3.32 
  -5  -6   1   39.04    2.79 
   5   6   1   43.57    3.41 
  -6  11   1   43.51    2.85 
  -5  -6   1   34.95    2.68 
 -11   5   1   32.37    3.22 
   6 -11   1   36.77    3.53 
   6   5  -1   72.81    4.31 
  -5  11  -1   62.42    4.29 
 -11   6  -1   71.13    3.68 
  11  -6  -1   66.76    4.06 
  -6  -5  -1   69.31    3.58 
  -5  11  -1   75.34    3.62 
  -6  -5  -1   77.78    3.72 
 -11   6  -1   63.65    3.68 
  -6  -5   1   67.27    3.54 
 -11   6   1   73.85    3.86 
  -6  -5   1   69.46    3.71 
  11  -6   1   71.06    4.06 
 -11   6   1   68.66    3.58 
  -5  11   1   79.66    3.71 
   6   5   1   65.83    4.16 
  -5  11   1   70.53    4.56 
   4 -11  -1   -0.35    0.84 
 -11   7  -1   -0.28    1.00 
   7   4  -1   -1.23    1.04 
 -11   7  -1    1.00    1.08 
  -7  -4  -1    0.66    0.87 
  -7  -4  -1    0.46    1.06 
  -4  11  -1   -0.34    1.19 
  11  -7  -1   -0.85    1.09 
  -4  11   1    1.57    1.39 
   4 -11   1   -0.47    0.86 
  -7  -4   1   -0.12    1.01 
   7   4   1    0.12    1.25 
  -7  -4   1   -0.45    0.79 
 -11   7   1   -0.75    0.94 
  11  -7   1    1.70    1.33 
 -11   7   1    0.66    1.10 
  -3  11  -1   42.00    4.20 
   8   3  -1   42.07    3.91 
  11  -8  -1   46.92    4.09 
  -8  -3  -1   45.55    3.18 
 -11   8  -1   45.42    3.15 
   3 -11  -1   39.22    2.89 
 -11   8  -1   42.80    3.28 
   3 -11   1   45.76    3.01 
  -8  -3   1   44.88    3.21 
 -11   8   1   43.78    3.13 
 -11   8   1   37.69    2.87 
  -3  11   1   51.79    4.01 
  11  -8   1   43.08    3.37 
   8   3   1   46.39    3.63 
 -11   9  -1   60.83    3.63 
 -11   9  -1   63.70    3.83 
  -2  11  -1   66.13    4.59 
   9   2  -1   59.63    4.16 
  11  -9  -1   55.76    3.95 
  -9  -2  -1   56.84    3.73 
   2 -11  -1   54.20    3.43 
   9   2   1   56.65    4.11 
  -2  11   1   50.97    4.65 
  -9  -2   1   59.80    3.78 
   2 -11   1   64.83    3.70 
 -11   9   1   57.45    3.70 
  11  -9   1   61.10    3.97 
  11 -10  -1    4.10    1.84 
 -10  -1  -1    2.08    1.53 
   1 -11  -1    0.22    1.13 
  -1  11  -1    1.94    1.67 
 -11  10  -1    0.30    1.27 
  10   1  -1    1.78    1.54 
   1 -11   1    2.06    1.41 
  -1  11   1    3.29    1.64 
 -11  10   1    0.35    1.24 
  10   1   1    0.70    1.56 
  11 -10   1   -1.83    1.02 
 -10  -1   1    2.24    1.44 
  11 -11  -1   26.83    3.27 
   0 -11  -1   28.80    3.13 
  11   0  -1   25.01    3.23 
 -11  11  -1   27.44    3.07 
 -11   0  -1   28.19    3.32 
   0  11  -1   27.86    3.55 
  11   0   1   26.19    3.37 
   0  11   1   24.04    3.34 
 -11   0   1   21.67    2.81 
 -11  11   1   32.39    3.37 
  11 -11   1   29.29    3.37 
   0 -11   1   24.82    2.89 
 -10  12  -1   34.21    3.88 
  10 -12  -1   34.65    3.91 
   2  10  -1   29.80    3.72 
  12  -2   1   32.40    3.80 
  10 -12   1   33.56    3.64 
  12  -3  -1    1.53    1.86 
  -3  -9  -1    0.22    1.01 
   3   9  -1   -0.10    1.28 
 -12   3  -1   -1.36    1.20 
  -9  12  -1    1.73    1.27 
   9 -12  -1    0.12    1.54 
 -12   3   1   -0.06    1.11 
  -3  -9   1    0.92    1.14 
   3   9   1    0.12    1.20 
  -9  12   1    0.79    1.17 
  12  -3   1   -1.24    1.58 
   9 -12   1   -1.00    1.40 
  12  -4  -1   45.71    4.10 
  -4  -8  -1   46.58    3.35 
 -12   4  -1   47.12    3.55 
  -8  12  -1   47.94    3.37 
   8 -12  -1   49.80    4.59 
   4   8  -1   48.40    4.50 
  12  -4   1   47.69    3.73 
  -8  12   1   55.72    3.67 
   4   8   1   53.54    3.96 
   8 -12   1   48.27    4.28 
 -12   4   1   50.97    3.58 
  -4  -8   1   47.67    3.32 
   7 -12  -1   37.06    3.90 
  12  -5  -1   46.43    4.17 
  -7  12  -1   40.90    3.07 
   5   7  -1   43.83    4.17 
  -5  -7  -1   45.55    3.25 
 -12   5  -1   47.87    3.57 
   7 -12   1   47.94    3.71 
  12  -5   1   46.30    3.59 
  -5  -7   1   43.45    3.13 
  -7  12   1   51.25    3.49 
   5   7   1   45.30    4.23 
 -12   5   1   48.45    3.43 
 -12   6  -1   -0.27    1.23 
   6 -12  -1    2.78    1.62 
  12  -6  -1    1.82    1.45 
   6   6  -1    2.56    1.56 
  -6  -6  -1    0.00    1.00 
  -6  12  -1    0.37    1.05 
   6   6   1   -0.06    1.21 
   6 -12   1    2.60    1.47 
  -6  -6   1    1.16    1.26 
 -12   6   1    1.73    1.27 
  12  -6   1    1.33    1.37 
  -6  12   1    0.91    1.16 
  -6  -6   1   -0.42    0.98 
  -5  12  -1   59.61    4.47 
  -7  -5  -1   58.32    3.65 
  12  -7  -1   65.59    4.24 
 -12   7  -1   65.46    3.83 
   7   5  -1   66.52    4.43 
 -12   7  -1   59.41    3.72 
  -7  -5  -1   67.09    3.70 
   7   5   1   69.90    4.51 
  -5  12   1   53.52    4.83 
  -7  -5   1   70.69    3.90 
  -7  -5   1   59.54    3.55 
  12  -7   1   67.62    4.16 
 -12   7   1   67.51    3.94 
 -12   7   1   61.28    3.86 
  -4  12  -1   37.20    4.03 
  -8  -4  -1   39.68    3.49 
   8   4  -1   37.21    3.85 
   4 -12  -1   42.13    3.12 
  12  -8  -1   41.27    4.05 
 -12   8  -1   40.66    3.59 
 -12   8  -1   41.45    3.65 
   8   4   1   36.51    3.72 
   4 -12   1   37.17    3.27 
 -12   8   1   44.23    3.67 
  -8  -4   1   34.30    3.26 
 -12   8   1   38.81    3.45 
  12  -8   1   37.85    3.64 
  -4  12   1   42.14    4.47 
   3 -12  -1    2.59    1.42 
  -3  12  -1    1.99    1.77 
 -12   9  -1    2.26    1.56 
  -9  -3  -1    0.91    1.47 
 -12   9  -1    2.18    1.41 
  12  -9  -1    4.80    1.90 
   9   3  -1    2.07    1.57 
  -3  12   1   -0.29    1.36 
 -12   9   1    3.34    1.62 
   9   3   1    3.78    1.81 
  12  -9   1    3.12    1.64 
   3 -12   1    1.38    1.20 
  -9  -3   1    3.61    1.59 
 -10  -2  -1   45.28    3.91 
 -12  10  -1   35.79    3.79 
  12 -10  -1   42.64    4.11 
  -2  12  -1   35.21    4.20 
   2 -12  -1   45.84    3.85 
 -12  10   1   44.58    3.91 
   2 -12   1   42.19    3.71 
 -10  -2   1   39.10    3.70 
  12 -10   1   45.93    4.11 
  -2  12   1   49.32    4.96 
  -8  13  -1   -1.20    1.14 
  -8  13   1   -0.36    1.13 
   8 -13   1   -0.89    1.48 
  -7  13  -1   28.56    3.03 
  -6  -7  -1   29.63    3.14 
   7 -13  -1   23.18    3.40 
   7 -13   1   30.81    3.60 
 -13   6   1   30.39    3.46 
  -6  -7   1   30.15    3.19 
  -7  13   1   27.95    3.11 
 -13   7  -1   30.08    3.34 
  -7  -6  -1   30.67    3.12 
   6 -13  -1   30.35    3.79 
   6 -13   1   28.65    3.49 
  -7  -6   1   35.76    3.34 
 -13   7   1   36.51    3.65 
  13  -7   1   33.58    3.64 
  -5  13  -1   -0.82    1.48 
 -13   8  -1   -0.77    1.17 
 -13   8   1    1.29    1.50 
 -13   8   1    0.95    1.50 
  -8  -5   1   -1.84    1.06 
  -9  -4  -1   19.83    2.84 
 -13   9  -1   20.11    2.83 
   0   0  -2  975.25   16.62 
   0   0  -2 1000.00   16.73 
  -1   1  -2   75.78    1.67 
  -1   0  -2   75.70    1.74 
   0   1  -2   74.84    1.63 
   1   0  -2   73.85    1.78 
   0  -1  -2   72.52    1.43 
   1  -1  -2   71.84    1.91 
  -1   1  -2   74.10    1.85 
   0  -1  -2   73.48    1.77 
   1  -1  -2   75.47    1.76 
   0   1  -2   72.41    1.90 
  -1   0  -2   70.89    1.66 
  -1   0   2   73.39    1.62 
  -1   1   2   74.00    1.80 
   0   1   2   72.51    1.82 
  -1   1   2   74.96    1.55 
   1  -1   2   73.84    1.55 
  -1   0   2   71.98    1.78 
   0   1   2   73.42    1.81 
   1   0   2   74.70    1.68 
   1  -2  -2  132.12    2.93 
  -1   2  -2  136.09    2.89 
  -2   1  -2  131.55    3.07 
  -1  -1  -2  137.61    2.83 
   2  -1  -2  133.68    3.26 
  -1   2  -2  138.10    3.33 
   2  -1  -2  136.70    2.82 
   1   1  -2  141.63    3.13 
  -1   2  -2  133.74    2.93 
   1   1  -2  136.68    3.00 
  -1   2  -2  133.58    3.05 
  -2   1  -2  138.86    2.77 
  -1  -1  -2  139.65    2.99 
  -1   2   2  134.69    3.36 
   1   1   2  137.61    3.15 
  -1   2   2  134.98    2.35 
  -1  -1   2  133.60    2.56 
  -1   2   2  134.27    3.05 
   2  -1   2  131.99    2.96 
  -2   1   2  135.10    2.96 
  -2   1   2  135.96    2.93 
  -2   0  -2   40.23    1.25 
  -2   2  -2   42.44    1.47 
   0  -2  -2   39.48    0.96 
   2  -2  -2   40.81    1.24 
   2   0  -2   41.99    1.56 
  -2   2  -2   40.19    1.11 
   0   2  -2   39.71    1.42 
  -2   2  -2   39.11    1.45 
   0  -2  -2   38.98    1.40 
   0   2  -2   40.44    1.42 
  -2   0  -2   38.37    1.36 
   2   0  -2   40.57    1.28 
  -2   2   2   40.83    1.16 
   0  -2   2   40.43    1.52 
   0   2   2   39.09    1.50 
  -2   0   2   40.88    1.46 
   0   2   2   40.49    1.32 
   2   0   2   40.38    1.43 
  -2   2   2   40.21    1.42 
  -2   0   2   40.67    1.12 
   2  -2   2   39.45    1.37 
  -3   1  -2  103.01    2.18 
   2  -3  -2  106.80    2.52 
  -3   1  -2  109.42    2.83 
   1   2  -2  102.33    2.70 
   3  -1  -2  107.68    3.00 
  -2   3  -2   99.54    2.76 
  -2   3  -2  104.95    2.42 
  -1  -2  -2  105.16    2.70 
  -1  -2  -2  105.53    2.39 
  -2   3  -2  103.50    2.67 
   3  -1  -2  106.87    2.34 
   1   2  -2  109.33    2.90 
  -2   3  -2  107.49    2.86 
   1   2   2  104.76    2.91 
   1   2   2  108.70    2.49 
  -3   1   2  104.03    2.48 
  -2   3   2  100.81    2.70 
   3  -1   2  106.08    2.75 
  -2   3   2  103.84    3.12 
  -3   1   2  103.00    2.71 
  -1  -2   2  103.62    2.75 
  -2   3   2  104.79    2.17 
  -2  -1  -2   34.60    1.30 
   2   1  -2   37.62    1.39 
  -2  -1  -2   37.29    1.36 
  -3   2  -2   36.84    0.91 
  -1   3  -2   33.19    1.33 
   2   1  -2   35.91    1.52 
  -3   2  -2   34.84    1.45 
   3  -2  -2   36.46    1.19 
   1  -3  -2   35.07    0.84 
  -1   3  -2   37.76    1.60 
   3  -2  -2   35.65    1.63 
  -1   3  -2   35.49    1.49 
  -1   3  -2   35.11    1.25 
   1  -3  -2   32.29    1.33 
  -2  -1   2   37.32    1.53 
  -1   3   2   35.15    1.67 
  -2  -1   2   35.53    0.80 
  -3   2   2   34.45    1.29 
  -1   3   2   36.51    1.38 
   2   1   2   34.73    1.50 
  -3   2   2   33.71    1.37 
   3  -2   2   36.48    1.42 
   0   3  -2  251.99    5.27 
  -3   0  -2  256.89    5.34 
  -3   0  -2  246.04    4.86 
   3  -3  -2  245.31    5.80 
   3  -3  -2  248.26    4.76 
   0   3  -2  251.17    4.73 
   0   3  -2  244.91    5.50 
   3   0  -2  252.55    5.61 
   0  -3  -2  256.89    4.64 
  -3   3  -2  243.78    5.33 
   0  -3  -2  241.39    5.23 
   3   0  -2  251.97    4.96 
  -3   3  -2  256.97    4.60 
   3  -3   2  250.92    5.43 
   3   0   2  250.16    5.48 
  -3   3   2  249.54    4.92 
  -3   0   2  249.87    4.72 
  -3   0   2  232.60    5.34 
   0   3   2  254.16    5.07 
   0  -3   2  250.51    5.31 
  -3   3   2  249.32    5.33 
  -1  -3  -2   58.56    2.09 
   1   3  -2   58.02    2.13 
  -1  -3  -2   62.24    1.82 
   1   3  -2   65.54    2.39 
   4  -1  -2   61.18    1.70 
  -3   4  -2   62.86    1.76 
   3  -4  -2   61.73    1.85 
   4  -1  -2   59.52    2.39 
  -4   1  -2   65.54    2.27 
  -3   4  -2   59.97    2.13 
   3  -4  -2   58.56    2.55 
  -4   1  -2   62.44    1.61 
  -3   4  -2   58.36    2.13 
   1   3   2   61.57    2.37 
  -4   1   2   58.57    2.14 
  -4   1   2   61.89    1.87 
  -1  -3   2   62.01    2.14 
  -3   4   2   63.13    1.73 
   1   3   2   61.05    1.80 
  -3   4   2   59.35    2.14 
   4  -1   2   66.76    2.27 
   3  -4   2   60.92    2.25 
   2  -4  -2  238.17    4.96 
   2   2  -2  244.03    5.57 
  -2   4  -2  229.14    5.56 
  -2   4  -2  242.25    5.11 
  -2  -2  -2  227.60    5.07 
  -4   2  -2  237.95    5.37 
   2   2  -2  228.61    5.10 
   4  -2  -2  228.44    4.39 
  -4   2  -2  231.25    4.29 
  -2   4  -2  232.16    5.55 
  -2   4  -2  235.04    4.92 
  -2  -2  -2  236.52    4.93 
  -4   2  -2  228.33    5.17 
   4  -2  -2  236.16    5.68 
  -4   2   2  235.67    5.06 
  -2  -2   2  235.33    5.29 
  -2   4   2  236.09    4.58 
   2   2   2  241.12    5.55 
   2   2   2  241.54    4.83 
  -4   2   2  238.50    5.18 
   4  -2   2  239.97    5.38 
  -2   4   2  231.71    5.16 
  -2   4   2  237.07    5.87 
   4  -3  -2   41.33    1.39 
  -1   4  -2   42.36    1.67 
  -4   3  -2   44.15    1.84 
   1  -4  -2   41.40    1.70 
  -4   3  -2   41.74    1.78 
  -3  -1  -2   44.13    1.61 
   3   1  -2   41.05    1.61 
  -1   4  -2   41.79    1.50 
   4  -3  -2   42.25    2.02 
   3   1  -2   41.57    1.91 
  -4   3  -2   43.71    0.98 
  -3  -1  -2   43.39    1.74 
  -1   4  -2   39.74    1.91 
   1  -4  -2   44.18    1.18 
  -1   4  -2   43.72    1.81 
  -1   4   2   45.29    1.66 
  -3  -1   2   43.55    1.04 
  -3  -1   2   44.81    1.84 
   4  -3   2   41.56    1.79 
   3   1   2   41.42    1.88 
  -4   3   2   40.52    1.74 
  -1   4   2   40.92    2.02 
  -4   3   2   43.42    1.63 
   0   4  -2   50.75    1.52 
  -4   4  -2   51.39    2.04 
   4  -4  -2   48.42    2.36 
   0   4  -2   50.52    2.19 
   0   4  -2   49.94    2.01 
   0  -4  -2   50.32    1.51 
  -4   4  -2   47.60    1.99 
   0  -4  -2   48.49    1.98 
  -4   0  -2   53.29    1.67 
  -4   0  -2   51.79    2.06 
  -4   4  -2   51.20    1.37 
   4   0  -2   52.51    1.76 
   4  -4  -2   50.73    1.54 
   4   0  -2   53.55    2.37 
   0   4   2   50.32    2.27 
   4   0   2   46.79    2.11 
  -4   4   2   47.07    2.03 
  -4   4   2   50.82    1.76 
   4  -4   2   51.04    2.11 
   0   4   2   53.11    1.79 
   0  -4   2   51.21    1.98 
  -4   0   2   54.03    1.53 
  -4   0   2   50.89    2.10 
  -4   5  -2  148.08    3.36 
   1   4  -2  148.02    4.38 
   1   4  -2  146.85    4.07 
  -5   1  -2  154.29    4.24 
   4  -5  -2  147.96    3.47 
   4  -5  -2  147.56    4.77 
  -4   5  -2  147.56    4.09 
   1   4  -2  151.27    3.01 
  -1  -4  -2  149.34    3.55 
   5  -1  -2  150.84    3.39 
  -4   5  -2  150.36    4.07 
  -1  -4  -2  149.13    4.06 
  -5   1  -2  155.00    3.30 
   5  -1  -2  152.22    4.48 
  -4   5   2  148.18    4.12 
   1   4   2  151.48    3.52 
   4  -5   2  153.51    4.35 
  -1  -4   2  148.91    4.02 
  -5   1   2  156.53    3.61 
   5  -1   2  148.60    4.24 
   1   4   2  153.70    4.48 
  -4   5   2  148.71    3.56 
  -5   1   2  155.56    4.24 
  -3   5  -2   31.74    1.84 
   2   3  -2   26.91    1.51 
  -2  -3  -2   28.64    1.55 
   5  -2  -2   28.98    1.05 
  -5   2  -2   29.49    1.65 
  -3   5  -2   29.49    1.69 
   2   3  -2   28.20    1.76 
  -3   5  -2   27.87    1.51 
  -5   2  -2   29.06    0.88 
   3  -5  -2   29.41    1.39 
   5  -2  -2   28.50    1.84 
  -2  -3  -2   29.20    1.40 
  -3   5  -2   29.18    1.32 
   2   3   2   29.20    1.17 
   2   3   2   29.75    1.77 
  -3   5   2   29.19    1.94 
  -5   2   2   28.67    1.42 
  -2  -3   2   27.83    1.60 
  -3   5   2   28.84    1.56 
   5  -2   2   30.14    1.71 
  -3   5   2   30.39    1.26 
  -5   2   2   32.65    1.67 
  -5   3  -2   49.96    2.13 
   2  -5  -2   53.74    1.48 
  -2   5  -2   55.75    2.01 
  -2   5  -2   52.70    1.97 
  -3  -2  -2   52.66    2.04 
  -5   3  -2   49.98    2.18 
  -2   5  -2   51.60    2.38 
   3   2  -2   54.46    2.35 
  -2   5  -2   53.04    2.24 
   3   2  -2   54.50    2.09 
  -3  -2  -2   56.47    2.05 
   5  -3  -2   53.42    2.48 
   5  -3  -2   52.10    1.35 
   2  -5  -2   51.57    1.99 
  -3  -2   2   49.37    2.16 
   5  -3   2   50.91    2.19 
  -2   5   2   54.85    2.05 
  -2   5   2   52.55    2.56 
  -5   3   2   52.00    2.09 
  -5   3   2   52.79    2.06 
   3   2   2   55.21    1.85 
   3   2   2   52.14    2.27 
   5  -4  -2  188.12    3.92 
   4   1  -2  188.10    4.44 
  -1   5  -2  184.66    4.62 
  -1   5  -2  188.54    5.17 
   1  -5  -2  193.02    3.86 
  -1   5  -2  185.43    4.24 
  -5   4  -2  185.61    4.80 
  -4  -1  -2  186.16    4.35 
   1  -5  -2  190.56    4.69 
   5  -4  -2  184.39    5.27 
  -5   4  -2  186.73    4.81 
   4   1  -2  188.94    5.10 
  -4  -1  -2  185.91    4.71 
   1  -5   2  186.86    4.63 
  -1   5   2  185.22    5.30 
  -5   4   2  180.07    4.48 
   4   1   2  190.94    5.00 
  -4  -1   2  184.41    4.86 
  -1   5   2  195.99    4.49 
   5  -4   2  185.66    4.86 
  -5   4   2  182.77    4.72 
   0   5  -2   16.04    0.91 
   5   0  -2   13.95    1.14 
   0  -5  -2   14.64    0.92 
   5  -5  -2   13.55    1.58 
   5  -5  -2   13.63    0.85 
   0  -5  -2   15.11    1.45 
  -5   0  -2   15.02    0.98 
   0   5  -2   15.30    1.40 
  -5   5  -2   13.82    1.35 
  -5   5  -2   14.15    1.36 
  -5   0  -2   15.57    1.46 
   5   0  -2   13.49    1.50 
   0   5  -2   16.04    1.61 
   5   0   2   14.04    1.47 
  -5   0   2   11.60    1.32 
  -5   5   2   15.95    1.12 
   0   5   2   13.86    1.04 
   0  -5   2   14.93    1.35 
   5  -5   2   13.73    1.40 
  -5   0   2   14.19    0.87 
  -5   5   2   13.19    1.30 
   0   5   2   17.66    1.79 
   5  -5   2   14.37    0.73 
  -6   1  -2   38.00    1.46 
   5  -6  -2   36.83    1.51 
  -1  -5  -2   37.71    1.62 
  -6   1  -2   36.63    2.05 
   1   5  -2   43.25    2.17 
   1   5  -2   35.70    2.23 
  -1  -5  -2   40.49    2.09 
   6  -1  -2   40.30    2.35 
  -5   6  -2   38.45    2.05 
   6  -1  -2   39.15    1.56 
  -5   6  -2   41.77    2.08 
   5  -6  -2   43.99    2.55 
   5  -6   2   39.32    2.20 
  -5   6   2   39.47    1.72 
  -6   1   2   39.71    2.14 
  -1  -5   2   38.68    1.94 
  -6   1   2   41.84    1.68 
  -5   6   2   37.07    2.05 
   6  -1   2   39.87    2.17 
   5  -6   2   40.92    1.48 
   1   5   2   38.79    1.57 
   1   5   2   37.10    2.32 
   6  -2  -2   58.62    2.80 
   4  -6  -2   59.74    2.08 
   2   4  -2   57.14    2.68 
   4  -6  -2   54.90    2.88 
  -4   6  -2   57.58    2.42 
  -4   6  -2   57.28    2.48 
  -2  -4  -2   57.79    2.11 
  -2  -4  -2   61.26    2.52 
   6  -2  -2   58.25    1.69 
   2   4  -2   58.14    2.45 
  -4   6  -2   58.21    2.00 
  -6   2  -2   59.46    1.53 
  -6   2  -2   54.07    2.49 
  -6   2   2   60.37    2.21 
  -4   6   2   54.49    2.40 
   2   4   2   57.69    2.69 
   4  -6   2   55.09    2.62 
  -2  -4   2   60.01    2.44 
   2   4   2   58.13    1.81 
  -4   6   2   59.10    2.05 
  -6   2   2   55.74    2.50 
   6  -2   2   61.41    2.63 
   3  -6  -2  115.28    3.26 
  -6   3  -2  111.36    3.47 
  -3   6  -2  114.41    3.43 
  -3   6  -2  107.09    3.90 
   3   3  -2  113.53    3.91 
   6  -3  -2  110.47    2.43 
   6  -3  -2  110.91    3.94 
  -3  -3  -2  109.87    3.25 
   3   3  -2  109.87    3.45 
  -6   3  -2  114.24    3.68 
  -3  -3  -2  107.37    3.39 
  -3   6  -2  107.33    3.14 
  -3   6  -2  102.73    3.56 
  -3  -3   2  116.76    3.61 
  -3   6   2  113.50    4.26 
   6  -3   2  109.76    3.63 
   3   3   2  114.97    3.85 
  -3   6   2  114.28    2.86 
   3   3   2  116.83    2.77 
  -6   3   2  106.61    3.32 
  -6   3   2  112.47    3.55 
  -3   6   2  110.50    3.44 
  -6   4  -2   64.02    2.59 
  -4  -2  -2   55.05    2.28 
  -2   6  -2   61.31    2.82 
  -2   6  -2   58.90    2.31 
  -2   6  -2   60.75    2.24 
  -6   4  -2   54.16    2.41 
   2  -6  -2   59.50    1.73 
   4   2  -2   60.97    2.77 
  -4  -2  -2   56.12    2.25 
   2  -6  -2   56.96    2.31 
  -2   6  -2   60.04    2.44 
   6  -4  -2   59.81    2.85 
   4   2  -2   56.47    2.28 
   6  -4   2   57.20    2.59 
  -6   4   2   56.76    2.41 
   4   2   2   57.52    2.68 
  -2   6   2   61.53    2.32 
  -6   4   2   59.43    2.39 
  -4  -2   2   62.40    2.58 
  -2   6   2   56.85    2.85 
  -5  -1  -2   17.93    1.23 
   1  -6  -2   19.92    1.02 
  -6   5  -2   20.79    1.80 
   5   1  -2   17.85    1.82 
   5   1  -2   19.88    1.31 
  -1   6  -2   15.69    1.46 
  -1   6  -2   18.88    1.89 
  -6   5  -2   21.35    1.82 
  -1   6  -2   18.55    1.19 
   6  -5  -2   18.58    1.87 
  -5  -1  -2   18.33    1.67 
   1  -6  -2   18.15    1.62 
   5   1   2   21.82    1.70 
  -1   6   2   19.08    1.27 
  -1   6   2   13.17    1.64 
  -6   5   2   17.78    1.67 
  -5  -1   2   16.76    1.58 
   6  -5   2   18.96    1.74 
   1  -6   2   18.55    1.38 
  -6   5   2   19.30    1.34 
  -6   6  -2  104.92    3.59 
   6   0  -2  104.18    3.06 
   6   0  -2  105.77    4.10 
   0   6  -2  107.59    3.63 
  -6   6  -2  105.94    3.69 
   0   6  -2  106.58    4.02 
  -6   0  -2  103.92    2.94 
   0  -6  -2  106.42    3.66 
   0   6  -2  106.84    2.79 
   0  -6  -2  108.79    2.94 
  -6   0  -2   98.10    3.59 
   6   0   2  104.00    3.91 
  -6   6   2  108.84    3.30 
   0  -6   2  103.92    3.33 
  -6   6   2  103.58    3.66 
   6  -6   2  102.96    3.70 
   0   6   2  107.23    3.07 
  -6   0   2  100.23    3.71 
   0   6   2  104.18    4.02 
   6  -7  -2   40.68    2.77 
   1   6  -2   38.94    2.61 
  -7   1  -2   41.03    2.37 
   7  -1  -2   43.63    2.66 
   1   6  -2   39.42    2.29 
  -6   7  -2   39.14    2.27 
  -1  -6  -2   37.63    2.25 
  -6   7  -2   36.62    2.16 
   6  -7   2   38.14    2.39 
   1   6   2   49.92    2.87 
  -6   7   2   37.61    1.89 
  -1  -6   2   36.35    2.02 
  -6   7   2   39.20    2.33 
  -7   1   2   39.30    2.32 
   7  -1   2   41.40    2.55 
   2   5  -2  159.17    5.27 
  -5   7  -2  164.14    4.83 
  -5   7  -2  163.51    4.79 
  -7   2  -2  154.04    4.84 
  -2  -5  -2  160.79    4.76 
   2   5  -2  158.51    4.74 
  -2  -5  -2  162.81    4.20 
   7  -2  -2  159.89    5.22 
   5  -7  -2  150.54    5.44 
   5  -7  -2  163.97    4.08 
  -2  -5   2  158.71    4.62 
  -7   2   2  152.27    4.82 
   2   5   2  162.01    5.29 
  -5   7   2  156.39    4.72 
  -5   7   2  161.97    4.21 
   5  -7   2  157.74    5.08 
   7  -2   2  157.51    4.91 
  -7   2   2  160.32    4.24 
   5  -7   2  163.05    3.98 
   3   4  -2   34.35    1.99 
   7  -3  -2   35.99    2.43 
  -3  -4  -2   37.72    2.08 
  -4   7  -2   39.48    2.08 
  -4   7  -2   35.23    2.15 
   4  -7  -2   36.62    1.80 
   3   4  -2   39.80    2.38 
  -4   7  -2   37.89    2.43 
  -3  -4  -2   34.54    1.86 
  -7   3  -2   35.09    2.14 
  -7   3   2   36.80    1.89 
  -7   3   2   39.52    2.26 
   3   4   2   38.16    2.36 
   4  -7   2   36.67    1.79 
  -4   7   2   38.39    2.10 
  -4   7   2   41.61    2.66 
  -3  -4   2   35.51    2.07 
   7  -3   2   40.19    2.30 
  -3   7  -2   18.78    1.75 
  -3   7  -2   20.81    1.45 
   7  -4  -2   23.68    2.30 
  -3   7  -2   17.34    1.93 
   4   3  -2   19.69    2.01 
   3  -7  -2   20.93    1.52 
  -4  -3  -2   22.82    1.61 
  -7   4  -2   23.85    1.77 
  -7   4  -2   24.98    2.13 
  -3   7  -2   22.81    1.58 
   4   3  -2   21.40    1.62 
  -4  -3  -2   21.74    1.56 
   7  -4   2   23.47    2.07 
  -4  -3   2   23.15    1.70 
  -3   7   2   22.75    1.60 
   4   3   2   24.52    1.90 
  -7   4   2   21.82    1.59 
  -3   7   2   20.76    2.19 
   3  -7   2   22.15    1.52 
  -7   4   2   22.43    1.67 
  -5  -2  -2  127.46    4.10 
   2  -7  -2  126.66    3.99 
  -2   7  -2  128.66    3.97 
  -7   5  -2  121.96    4.18 
   5   2  -2  132.19    3.89 
   7  -5  -2  127.68    4.64 
  -2   7  -2  138.04    3.78 
   5   2  -2  133.79    4.65 
  -2   7  -2  117.37    4.48 
  -5  -2  -2  135.30    3.88 
  -7   5  -2  123.46    4.14 
  -5  -2   2  132.91    4.32 
   2  -7   2  133.30    3.95 
  -7   5   2  130.41    4.19 
  -7   5   2  129.14    3.99 
   5   2   2  132.66    4.50 
  -2   7   2  124.07    4.73 
   7  -5   2  134.39    4.41 
  -2   7   2  125.18    3.80 
  -6  -1  -2   31.73    1.73 
   6   1  -2   34.25    2.40 
  -6  -1  -2   35.50    2.16 
   1  -7  -2   36.12    2.18 
  -7   6  -2   33.44    2.18 
   7  -6  -2   32.42    2.46 
   6   1  -2   32.80    1.79 
  -1   7  -2   32.37    2.32 
  -1   7  -2   36.10    2.12 
  -1   7  -2   35.13    1.66 
  -7   6  -2   32.02    2.09 
  -7   6   2   30.76    2.11 
   7  -6   2   36.37    2.28 
   6   1   2   33.10    2.23 
  -1   7   2   34.79    1.80 
  -1   7   2   32.63    2.43 
   1  -7   2   32.59    1.85 
  -7   6   2   29.67    1.83 
  -6  -1   2   31.00    2.10 
  -7   0  -2   25.87    1.98 
   0   7  -2   27.44    2.57 
   0   7  -2   30.35    2.07 
   7   0  -2   27.46    2.52 
   7  -7  -2   30.00    2.84 
  -7   7  -2   28.71    2.06 
   0  -7  -2   19.45    1.91 
  -7   7  -2   28.86    2.10 
   0   7   2   28.39    1.73 
   7  -7   2   31.86    2.31 
  -7   7   2   25.71    1.74 
   0   7   2   23.96    2.41 
  -7   0   2   29.56    2.11 
  -7   7   2   28.14    2.14 
   7   0   2   28.58    2.23 
   0  -7   2   27.18    1.83 
   8  -1  -2   59.53    3.58 
  -7   8  -2   55.92    3.00 
   1   7  -2   51.18    3.25 
  -7   8  -2   60.78    3.01 
   7  -8  -2   56.49    3.53 
  -8   1  -2   55.34    3.09 
  -1  -7  -2   63.94    3.13 
  -8   1   2   55.56    3.15 
   1   7   2   64.52    3.56 
   7  -8   2   61.39    3.29 
  -1  -7   2   61.44    3.06 
   8  -1   2   62.63    3.35 
  -1  -7   2   57.87    2.71 
  -7   8   2   58.20    3.05 
  -8   2  -2   28.26    2.49 
  -2  -6  -2   26.63    2.00 
   2   6  -2   25.06    2.51 
   8  -2  -2   23.02    2.37 
   6  -8  -2   26.44    2.76 
  -6   8  -2   24.63    2.18 
   2   6  -2   28.77    2.13 
  -6   8  -2   27.02    2.35 
   2   6   2   30.17    2.37 
   6  -8   2   31.05    2.30 
   8  -2   2   32.92    2.79 
  -8   2   2   28.39    2.51 
  -2  -6   2   28.66    1.97 
  -6   8   2   25.16    2.26 
  -5   8  -2    9.93    1.45 
  -8   3  -2   14.51    1.82 
  -3  -5  -2   13.44    1.46 
   3   5  -2   13.98    1.95 
  -3  -5  -2   12.61    1.63 
   5  -8  -2   13.91    1.38 
  -5   8  -2   13.29    1.78 
   5  -8  -2   10.11    1.75 
   8  -3  -2   12.16    1.83 
   3   5  -2   11.40    1.50 
   3   5   2   12.32    1.84 
   5  -8   2   13.19    1.30 
  -3  -5   2   13.27    1.60 
   5  -8   2   12.67    1.76 
  -5   8   2   14.34    1.67 
  -8   3   2   13.27    1.46 
  -8   3   2   10.98    1.55 
   8  -3   2   13.61    1.81 
  -4   8  -2  107.56    3.99 
  -4   8  -2  115.31    3.92 
   4   4  -2  114.71    4.00 
   4  -8  -2  110.53    3.65 
  -8   4  -2  111.26    3.96 
   8  -4  -2  114.32    4.60 
  -4   8  -2  117.52    4.70 
  -4  -4  -2  119.46    4.05 
  -8   4  -2  115.53    4.23 
   4   4  -2  114.77    4.56 
  -4  -4  -2  118.44    3.83 
  -8   4   2  115.40    4.13 
   4  -8   2  120.26    3.69 
   8  -4   2  120.10    4.38 
  -4   8   2  117.64    5.02 
  -8   4   2  110.50    3.82 
  -4   8   2  117.83    4.04 
  -4  -4   2  119.48    4.09 
   4   4   2  109.50    4.36 
  -8   5  -2   18.56    1.91 
   5   3  -2   13.98    1.89 
   3  -8  -2   21.82    1.90 
  -5  -3  -2   19.74    1.86 
   8  -5  -2   21.12    2.42 
  -3   8  -2   20.42    1.77 
  -5  -3  -2   18.94    1.79 
  -3   8  -2   18.21    2.15 
  -8   5  -2   24.20    2.31 
   5   3  -2   22.69    1.95 
  -5  -3   2   20.64    2.02 
  -8   5   2   17.78    1.80 
   5   3   2   15.47    1.87 
  -3   8   2   18.33    1.73 
   3  -8   2   22.75    1.73 
   3  -8   2   16.83    1.66 
  -3   8   2   18.99    2.40 
  -8   5   2   17.37    1.81 
   8  -5   2   17.27    1.91 
   2  -8  -2   41.08    2.38 
  -8   6  -2   45.61    2.52 
  -2   8  -2   42.60    2.10 
   8  -6  -2   38.84    2.72 
  -2   8  -2   43.55    2.92 
  -8   6  -2   42.67    2.49 
  -6  -2  -2   38.25    2.38 
   6   2  -2   43.35    2.88 
   6   2  -2   44.53    2.26 
  -6  -2  -2   38.41    2.15 
  -8   6   2   44.22    2.53 
   8  -6   2   39.06    2.56 
   6   2   2   43.72    2.75 
  -8   6   2   36.04    2.21 
  -2   8   2   40.92    2.21 
  -2   8   2   42.56    2.92 
   2  -8   2   41.22    2.37 
  -6  -2   2   44.11    2.58 
   2  -8   2   39.29    2.14 
  -8   7  -2  124.21    4.67 
   8  -7  -2  129.21    5.13 
  -8   7  -2  127.91    4.57 
  -7  -1  -2  125.31    4.64 
   1  -8  -2  139.21    4.68 
   7   1  -2  133.83    4.02 
  -7  -1  -2  131.78    3.94 
   7   1  -2  128.99    5.04 
  -1   8  -2  132.86    5.24 
   7   1   2  137.25    5.01 
  -7  -1   2  130.04    4.78 
   1  -8   2  131.78    4.16 
   8  -7   2  134.27    4.84 
  -8   7   2  135.14    4.34 
   1  -8   2  132.18    4.58 
  -1   8   2  136.12    4.05 
  -8   7   2  136.82    4.74 
  -1   8   2  134.65    5.32 
   8  -8  -2   17.01    2.33 
  -8   8  -2   17.09    2.03 
   8   0  -2   20.88    2.52 
   0   8  -2   14.38    2.09 
  -8   0  -2   14.61    1.86 
  -8   8  -2   17.68    2.01 
   0  -8  -2   18.14    2.10 
   0   8   2   17.78    2.45 
   0  -8   2   15.44    1.90 
  -8   8   2   15.20    1.91 
   8  -8   2   14.07    1.91 
  -8   0   2   19.92    2.28 
   8   0   2   14.44    1.97 
   1   8  -2   12.48    2.21 
  -8   9  -2   11.65    1.77 
  -8   9  -2   17.49    2.13 
   9  -1  -2   15.83    2.38 
  -1  -8  -2   14.98    2.07 
  -9   1  -2   10.57    1.85 
   8  -9  -2   16.62    2.55 
   9  -1   2   15.70    2.26 
  -9   1   2   16.03    2.16 
  -8   9   2   13.72    1.94 
  -1  -8   2   14.66    1.99 
   1   8   2   17.21    2.43 
   8  -9   2   15.01    2.10 
  -7   9  -2   23.78    2.37 
   9  -2  -2   26.14    2.85 
   7  -9  -2   22.75    2.73 
  -7   9  -2   30.08    2.67 
   2   7  -2   24.97    2.72 
  -2  -7  -2   30.72    2.64 
  -9   2  -2   24.75    2.61 
  -9   2   2   24.37    2.44 
   9  -2   2   30.84    2.88 
   7  -9   2   29.54    2.80 
   2   7   2   26.06    2.80 
  -7   9   2   26.41    2.40 
  -2  -7   2   25.17    2.21 
  -2  -7   2   26.24    2.50 
  -9   3  -2  100.33    4.21 
  -6   9  -2   99.87    4.24 
  -6   9  -2  103.79    4.10 
   9  -3  -2  104.82    4.70 
   6  -9  -2   95.88    4.76 
  -3  -6  -2  101.85    4.10 
   3   6  -2   96.17    4.46 
  -6   9   2  100.40    4.08 
  -3  -6   2   98.22    3.83 
  -9   3   2  105.45    4.29 
  -3  -6   2  104.22    4.12 
   9  -3   2  102.01    4.31 
   3   6   2  105.99    4.63 
   6  -9   2   97.50    4.31 
  -5   9  -2   12.62    1.65 
   5  -9  -2   14.31    1.57 
   9  -4  -2   11.00    1.83 
  -5   9  -2   12.36    1.72 
   5  -9  -2    9.12    1.92 
  -4  -5  -2   10.99    1.61 
  -4  -5  -2   14.32    1.65 
  -9   4  -2   10.85    1.78 
   4   5  -2   10.31    1.86 
   4   5   2    7.90    1.82 
  -4  -5   2   14.81    1.87 
  -9   4   2   12.67    1.58 
  -4  -5   2   12.03    1.60 
  -9   4   2   12.99    1.80 
   5  -9   2   11.47    1.86 
   9  -4   2   14.18    1.92 
  -5   9   2   12.20    1.66 
  -4   9  -2   39.45    2.36 
   4  -9  -2   42.36    2.38 
   5   4  -2   43.06    3.03 
  -9   5  -2   43.38    2.77 
  -4   9  -2   39.38    2.99 
   5   4  -2   35.36    2.33 
   9  -5  -2   44.92    3.11 
  -5  -4  -2   40.54    2.41 
  -5  -4  -2   38.66    2.40 
  -9   5  -2   37.16    2.49 
   9  -5   2   45.42    2.84 
  -5  -4   2   43.61    2.63 
  -9   5   2   41.46    2.49 
  -5  -4   2   35.17    2.34 
   4  -9   2   45.29    2.42 
  -4   9   2   41.33    2.42 
  -9   5   2   41.85    2.57 
   5   4   2   44.94    2.97 
  -4   9   2   34.07    3.24 
  -3   9  -2   69.06    3.92 
  -9   6  -2   72.43    3.45 
   6   3  -2   67.30    3.72 
  -3   9  -2   69.31    2.97 
  -6  -3  -2   70.01    3.26 
  -6  -3  -2   72.10    3.13 
   9  -6  -2   68.54    3.82 
   3  -9  -2   61.35    3.00 
  -9   6  -2   73.68    3.50 
  -9   6   2   71.70    3.39 
   6   3   2   71.86    3.64 
  -9   6   2   66.35    3.21 
   3  -9   2   67.55    3.12 
  -3   9   2   73.72    3.16 
  -6  -3   2   68.40    3.08 
  -6  -3   2   74.04    3.48 
  -3   9   2   73.61    4.13 
   9  -6   2   70.40    3.49 
   2  -9  -2   28.72    2.48 
  -7  -2  -2   24.90    2.33 
  -9   7  -2   28.10    2.59 
  -2   9  -2   24.87    2.79 
  -9   7  -2   24.39    2.42 
  -7  -2  -2   28.30    1.95 
   7   2  -2   22.06    2.47 
   9  -7  -2   23.41    2.62 
  -9   7   2   25.07    2.25 
   7   2   2   22.94    2.53 
  -7  -2   2   27.33    1.99 
  -7  -2   2   29.54    2.77 
   2  -9   2   27.72    2.46 
  -9   7   2   28.42    2.54 
  -2   9   2   26.02    1.92 
   9  -7   2   28.51    2.65 
  -2   9   2   25.85    2.83 
   8   1  -2   22.92    2.68 
   1  -9  -2   15.68    1.94 
  -1   9  -2   16.32    2.39 
  -9   8  -2   19.07    2.19 
  -9   8  -2   17.60    2.15 
   9  -8  -2   15.95    2.35 
  -8  -1  -2   18.09    2.13 
  -1   9   2   15.10    2.29 
  -9   8   2   17.56    1.90 
   9  -8   2   19.29    2.25 
  -9   8   2   15.57    2.06 
  -8  -1   2   16.15    2.12 
   1  -9   2   15.40    1.97 
   8   1   2   13.40    2.00 
   9  -9  -2   74.87    4.38 
  -9   9  -2   78.75    3.91 
  -9   9  -2   80.97    3.85 
   9   0  -2   73.93    4.31 
   0  -9  -2   69.28    3.66 
  -9   0  -2   74.18    3.77 
   0   9  -2   73.88    4.37 
   0  -9   2   75.94    3.78 
   9   0   2   70.52    4.01 
   0   9   2   79.57    4.46 
   9  -9   2   74.36    3.90 
  -9   0   2   78.07    3.95 
  -9   9   2   77.75    3.92 
  -1  -9  -2   17.45    2.33 
   9 -10  -2   20.18    2.87 
  -9  10  -2   14.72    2.20 
  10  -1  -2   17.05    2.71 
   1   9  -2   13.94    2.44 
 -10   1  -2   14.11    2.29 
   9 -10   2   18.07    2.51 
  10  -1   2   15.50    2.33 
  -9  10   2   16.08    2.29 
  -1  -9   2   17.18    2.32 
   1   9   2   16.04    2.56 
 -10   1   2   13.79    2.23 
  10  -2  -2   82.03    4.58 
   8 -10  -2   74.96    4.52 
  -8  10  -2   73.63    3.79 
 -10   2  -2   77.38    3.98 
  -2  -8  -2   76.33    3.85 
   2   8  -2   75.20    4.40 
  10  -2   2   73.06    4.19 
 -10   2   2   76.77    4.07 
   2   8   2   65.27    4.04 
   8 -10   2   85.90    4.37 
  -2  -8   2   78.23    3.88 
  -8  10   2   79.69    3.95 
  -3  -7  -2   29.01    2.68 
   3   7  -2   27.28    2.95 
  10  -3  -2   35.04    3.34 
   7 -10  -2   26.99    3.12 
  -7  10  -2   22.18    2.31 
 -10   3  -2   28.38    2.75 
   3   7   2   26.93    2.93 
  -7  10   2   31.12    2.80 
  -3  -7   2   24.81    2.45 
  -3  -7   2   21.44    2.19 
 -10   3   2   26.53    2.77 
   7 -10   2   31.75    2.97 
  10  -3   2   30.62    3.01 
  -4  -6  -2   11.92    1.77 
  10  -4  -2   15.52    2.40 
   4   6  -2   13.50    2.28 
   6 -10  -2   11.11    2.08 
  -6  10  -2   10.83    1.63 
 -10   4  -2   12.62    2.00 
  -6  10   2   10.23    1.69 
 -10   4   2   12.68    1.89 
   6 -10   2    9.94    1.88 
  -4  -6   2   14.45    1.94 
  -4  -6   2   14.32    1.84 
   4   6   2    9.82    1.97 
  10  -4   2   12.41    1.98 
  -5  -5  -2   66.38    3.20 
   5 -10  -2   63.53    4.12 
   5   5  -2   69.40    3.98 
  -5  10  -2   67.54    3.30 
   5 -10  -2   64.75    3.07 
  10  -5  -2   63.30    3.81 
  -5  -5  -2   69.27    3.42 
 -10   5  -2   65.79    3.53 
 -10   5   2   74.77    3.44 
   5   5   2   64.27    3.82 
  -5  10   2   69.14    3.43 
  -5  -5   2   64.78    3.41 
  -5  10   2   63.85    4.22 
  10  -5   2   63.82    3.50 
 -10   5   2   63.49    3.41 
   5 -10   2   68.85    3.88 
  -5  -5   2   67.13    3.32 
  -6  -4  -2   24.20    2.40 
  -4  10  -2   26.94    3.05 
 -10   6  -2   21.01    2.38 
  -4  10  -2   18.69    1.96 
  10  -6  -2   17.02    2.46 
 -10   6  -2   25.81    2.53 
  -6  -4  -2   19.37    2.05 
   4 -10  -2   22.48    2.19 
   6   4  -2   25.03    2.72 
  -6  -4   2   22.69    2.43 
 -10   6   2   22.20    2.28 
  -6  -4   2   21.95    2.21 
  10  -6   2   22.78    2.56 
   6   4   2   23.73    2.52 
  -4  10   2   23.21    2.25 
   4 -10   2   24.33    2.23 
 -10   6   2   25.39    2.46 
  -4  10   2   24.27    3.01 
   7   3  -2    3.08    1.38 
  10  -7  -2    5.89    1.64 
 -10   7  -2    4.87    1.36 
  -7  -3  -2    2.86    1.02 
 -10   7  -2    4.70    1.39 
  -3  10  -2    4.26    1.74 
   3 -10  -2    4.39    1.22 
  -7  -3  -2    5.18    1.39 
 -10   7   2    2.20    1.15 
  -7  -3   2    3.69    1.10 
  -3  10   2    5.28    1.76 
  -3  10   2    3.02    1.06 
  10  -7   2    4.29    1.42 
   7   3   2    7.31    1.69 
   3 -10   2    5.90    1.38 
 -10   7   2    2.30    1.10 
  -7  -3   2    4.31    1.42 
 -10   8  -2   67.87    3.59 
  -2  10  -2   67.87    4.20 
 -10   8  -2   64.26    3.67 
  -8  -2  -2   58.94    3.49 
  10  -8  -2   67.96    4.16 
   2 -10  -2   61.19    3.37 
   8   2  -2   63.20    3.96 
  10  -8   2   66.72    3.78 
  -2  10   2   79.62    4.62 
 -10   8   2   66.14    3.62 
 -10   8   2   68.31    3.46 
   8   2   2   63.54    3.92 
   2 -10   2   63.66    3.45 
  -8  -2   2   64.13    3.70 
  -9  -1  -2   13.72    2.16 
   1 -10  -2   10.39    1.87 
   9   1  -2   13.86    2.28 
  10  -9  -2   10.10    2.12 
  -1  10  -2   10.31    2.17 
 -10   9  -2   12.45    1.97 
 -10   9  -2   14.08    2.05 
  -9  -1   2   10.89    2.09 
   9   1   2   10.83    2.10 
   1 -10   2   10.87    1.89 
  -1  10   2   12.38    2.34 
  10  -9   2    9.40    1.85 
 -10   9   2   11.23    1.88 
 -10   0  -2   18.50    2.62 
  10   0  -2   21.36    2.92 
  10 -10  -2   18.02    2.78 
   0 -10  -2   19.32    2.44 
 -10  10  -2   18.66    2.40 
   0  10  -2   17.82    2.82 
 -10  10   2   18.32    2.41 
   0  10   2   21.24    2.95 
   0 -10   2   19.58    2.45 
 -10   0   2   17.12    2.55 
  10   0   2   18.06    2.59 
  10 -10   2   14.96    2.29 
   1  10  -2   50.31    4.74 
 -11   1  -2   49.68    3.77 
  10 -11  -2   41.43    4.20 
 -10  11  -2   49.52    3.53 
  11  -1  -2   48.60    4.54 
  -1 -10  -2   49.16    3.52 
  -1 -10   2   53.81    3.60 
 -10  11   2   49.56    3.56 
   1  10   2   54.67    4.24 
 -11   1   2   46.38    3.53 
  11  -1   2   50.77    4.35 
  10 -11   2   44.75    3.96 
   9 -11  -2    9.51    2.46 
  11  -2  -2   12.84    2.66 
  -9  11  -2   10.18    2.01 
  -2  -9  -2   11.90    2.04 
   2   9  -2    6.45    1.99 
 -11   2  -2   15.88    2.42 
  11  -2   2   11.86    2.37 
  -9  11   2   10.50    1.94 
   2   9   2   13.62    2.50 
   9 -11   2   13.79    2.25 
  -2  -9   2   10.52    2.06 
 -11   2   2   13.96    2.28 
  -8  11  -2   23.14    2.59 
  -3  -8  -2   24.54    2.73 
  11  -3  -2   21.16    3.03 
   8 -11  -2   24.93    3.32 
   3   8  -2   21.16    2.98 
 -11   3  -2   20.90    2.61 
  11  -3   2   25.00    3.00 
   3   8   2   25.73    3.09 
   8 -11   2   30.78    3.20 
  -3  -8   2   26.66    2.72 
  -8  11   2   25.28    2.68 
 -11   3   2   25.64    2.86 
   4   7  -2   53.43    3.80 
   7 -11  -2   43.40    3.97 
  11  -4  -2   50.58    3.86 
  -4  -7  -2   53.74    3.33 
 -11   4  -2   51.86    3.52 
  -7  11  -2   57.14    3.31 
  -7  11   2   48.92    3.26 
   4   7   2   52.50    3.71 
   7 -11   2   58.20    3.90 
  11  -4   2   48.94    3.56 
  -4  -7   2   49.82    3.19 
  -4  -7   2   51.04    3.12 
 -11   4   2   49.95    3.33 
  11  -5  -2   23.43    2.98 
   6 -11  -2   27.09    3.19 
  -6  11  -2   23.23    2.42 
   5   6  -2   20.11    2.82 
 -11   5  -2   20.08    2.49 
  -5  -6  -2   19.09    2.25 
  11  -5   2   19.93    2.57 
  -5  -6   2   24.38    2.52 
  -6  11   2   20.10    2.35 
   6 -11   2   24.06    2.83 
   5   6   2   26.20    3.08 
  -5  -6   2   20.83    2.35 
 -11   5   2   19.80    2.48 
  11  -6  -2   22.31    2.88 
   6   5  -2   25.16    3.07 
  -5  11  -2   22.68    2.33 
  -6  -5  -2   22.65    2.47 
  -5  11  -2   23.35    2.94 
  -6  -5  -2   26.06    2.58 
 -11   6  -2   20.48    2.62 
 -11   6   2   23.03    2.57 
  11  -6   2   22.86    2.56 
  -6  -5   2   25.98    2.58 
   5 -11   2   20.78    2.75 
 -11   6   2   25.57    2.55 
  -6  -5   2   32.44    3.04 
   6   5   2   24.65    2.99 
  -5  11   2   26.17    3.29 
  -5  11   2   22.65    2.42 
  -7  -4  -2   74.22    3.79 
  -4  11  -2   72.62    4.49 
   7   4  -2   80.23    4.58 
 -11   7  -2   73.35    3.90 
   4 -11  -2   69.88    3.62 
  11  -7  -2   71.72    4.28 
 -11   7  -2   70.78    3.92 
  -7  -4  -2   70.50    3.55 
  -7  -4   2   71.16    3.54 
  -4  11   2   66.37    4.57 
  -7  -4   2   72.14    3.86 
 -11   7   2   75.59    3.86 
   7   4   2   77.14    4.33 
 -11   7   2   73.52    3.81 
  11  -7   2   71.67    4.05 
   4 -11   2   76.88    3.70 
 -11   8  -2   16.77    2.33 
   8   3  -2   14.65    2.37 
   3 -11  -2   13.36    2.00 
  11  -8  -2   16.39    2.60 
  -3  11  -2   12.52    2.39 
 -11   8  -2   16.80    2.37 
  -8  -3  -2   17.72    2.40 
 -11   8   2   16.18    2.13 
  -3  11   2   19.21    2.81 
  11  -8   2   14.69    2.28 
   8   3   2   18.79    2.68 
 -11   8   2   15.72    2.23 
   3 -11   2   17.43    2.17 
  -8  -3   2   17.30    2.46 
 -11   9  -2   20.37    2.64 
   2 -11  -2   20.01    2.44 
 -11   9  -2   20.91    2.58 
  11  -9  -2   20.72    2.79 
  -2  11  -2   17.73    2.80 
   9   2  -2   24.66    3.07 
  -9  -2  -2   23.37    2.66 
   9   2   2   24.41    3.02 
 -11   9   2   22.81    2.71 
  -2  11   2   20.72    3.13 
  -9  -2   2   16.58    2.37 
   2 -11   2   16.18    2.27 
  11  -9   2   21.32    2.75 
 -10  -1  -2   43.29    3.76 
   1 -11  -2   47.55    3.34 
  10   1  -2   52.87    4.07 
  11 -10  -2   48.60    4.53 
  -1  11  -2   40.55    4.13 
 -11  10  -2   58.36    3.79 
   1 -11   2   47.58    3.38 
 -10  -1   2   53.87    3.81 
 -11  10   2   47.47    3.53 
  10   1   2   45.00    4.12 
  11 -10   2   48.58    3.64 
  -1  11   2   45.25    4.60 
   0 -11  -2   20.64    2.69 
   0  11  -2   25.40    3.49 
  11 -11  -2   17.56    3.01 
 -11  11  -2   19.19    2.75 
 -11   0  -2   20.32    2.88 
  11   0  -2   19.57    3.21 
  11   0   2   20.90    3.06 
   0 -11   2   23.29    2.87 
   0  11   2   19.60    3.22 
  11 -11   2   24.48    3.05 
 -11   0   2   22.50    3.11 
 -11  11   2   16.00    2.55 
  11 -12   2    7.27    2.01 
  10 -12  -2    6.72    2.35 
   2  10  -2    4.83    2.08 
  12  -2   2   -0.33    1.45 
  10 -12   2    4.05    1.79 
   9 -12  -2   45.74    4.46 
 -12   3  -2   42.30    3.83 
  12  -3  -2   47.24    4.40 
  -3  -9  -2   47.15    3.49 
  -9  12  -2   42.36    3.59 
   3   9  -2   37.28    3.96 
  -9  12   2   41.89    3.75 
   9 -12   2   47.33    4.25 
 -12   3   2   44.37    4.04 
   3   9   2   46.92    4.45 
  12  -3   2   53.50    4.07 
  -3  -9   2   47.89    3.45 
 -12   4  -2    6.93    1.89 
  -4  -8  -2   10.76    2.01 
  12  -4  -2    7.22    2.27 
  -8  12  -2    9.15    1.93 
   4   8  -2    4.91    1.96 
   8 -12  -2    5.00    1.98 
 -12   4   2    9.25    2.07 
  12  -4   2    5.53    2.02 
  -4  -8   2    7.17    1.70 
   8 -12   2   10.82    2.25 
   4   8   2    9.05    2.13 
  -8  12   2    8.64    1.87 
  -5  -7  -2   10.97    1.97 
   7 -12  -2    9.77    2.39 
   5   7  -2    8.60    2.15 
  -7  12  -2    7.56    1.75 
 -12   5  -2    9.62    2.09 
  12  -5  -2    9.25    2.24 
   5   7   2   10.70    2.22 
   7 -12   2   13.21    2.42 
  12  -5   2    9.34    2.00 
  -7  12   2   13.31    2.06 
 -12   5   2   10.10    2.01 
  -5  -7   2   14.57    2.11 
  -6  -6  -2   62.56    3.70 
   6   6  -2   67.01    4.38 
   6 -12  -2   58.59    4.38 
  12  -6  -2   63.00    4.32 
  -6  12  -2   63.79    3.61 
 -12   6  -2   61.42    3.87 
  12  -6   2   70.87    4.18 
  -6  -6   2   62.93    3.75 
 -12   6   2   54.06    3.59 
   6 -12   2   61.27    4.22 
  -6  -6   2   69.29    3.81 
  -6  12   2   64.65    3.74 
   6   6   2   75.18    4.65 
  -5  12  -2   12.36    2.55 
  12  -7  -2   14.29    2.72 
 -12   7  -2   13.62    2.33 
   7   5  -2   11.91    2.49 
  -7  -5  -2   14.24    2.13 
  -5  12   2   12.21    2.59 
  12  -7   2   12.64    2.18 
  -7  -5   2   12.48    1.97 
   7   5   2   14.43    2.52 
 -12   7   2   13.54    2.26 
  -7  -5   2   11.71    2.07 
 -12   7   2   10.18    1.94 
   5 -12   2   10.44    2.41 
 -12   8  -2   15.62    2.46 
  -8  -4  -2   15.03    2.40 
  12  -8  -2   18.85    2.91 
   8   4  -2   14.58    2.50 
   4 -12  -2   12.69    2.03 
 -12   8  -2   18.50    2.61 
  -4  12  -2   17.54    2.90 
   8   4   2   13.98    2.36 
 -12   8   2   15.27    2.21 
   4 -12   2   16.34    2.26 
  -8  -4   2   14.05    2.26 
 -12   8   2   16.93    2.37 
  -4  12   2   14.65    2.75 
  12  -8   2   13.96    2.36 
  -3  12  -2   44.03    4.41 
   9   3  -2   44.00    4.28 
  -9  -3  -2   42.81    3.74 
   3 -12  -2   50.02    3.51 
  12  -9  -2   35.27    3.85 
 -12   9  -2   51.59    3.63 
 -12   9  -2   43.26    3.89 
 -12   9   2   46.23    3.94 
  -3  12   2   44.75    4.68 
   3 -12   2   47.28    3.32 
  12  -9   2   44.75    3.92 
  -9  -3   2   46.59    3.99 
   9   3   2   49.05    4.42 
  -2  12  -2    8.40    2.36 
 -10  -2  -2   11.37    2.29 
   2 -12  -2   13.47    2.35 
 -12  10   2   11.43    2.56 
  12 -10   2   13.46    2.46 
   2 -12   2   10.63    2.12 
 -10  -2   2    8.99    2.14 
  12 -11   2    6.44    2.04 
   9 -13   2    9.70    2.42 
  -8  13  -2   42.30    3.72 
   8 -13   2   40.60    4.14 
  -8  13   2   47.81    3.64 
  -6  -7  -2    8.65    1.91 
  -7  13  -2    8.14    2.08 
 -13   6   2    8.28    2.05 
  -7  13   2    7.26    1.90 
  -6  -7   2    7.63    1.89 
  13  -6   2    6.11    2.00 
   7 -13   2    7.10    2.02 
  -7  -6  -2   10.22    1.96 
  -7  -6   2    9.49    2.09 
  13  -7   2   10.72    2.23 
 -13   7   2    6.51    1.93 
   6 -13   2    8.84    2.32 
  -7  -6   2    8.14    1.85 
  -5  13  -2   45.54    4.58 
 -13   8  -2   39.02    3.83 
 -13   8   2   38.80    3.64 
  13  -8   2   46.48    3.66 
 -13   8   2   47.58    3.46 
  -8  -5   2   38.08    3.74 
   5 -13   2   43.27    4.39 
 -13   9  -2   12.62    2.40 
  -9  -4  -2   12.23    2.31 
  -4  13  -2    9.24    2.94 
   0   0  -3   -0.30    0.34 
   0   0  -3    0.25    0.45 
   0   0  -3   -0.29    0.19 
  -1   1  -3  174.30    3.87 
   1   0  -3  187.52    3.72 
  -1   0  -3  179.82    3.69 
  -1   1  -3  182.11    3.73 
   1  -1  -3  174.31    3.88 
   0   1  -3  185.14    3.97 
   0  -1  -3  182.17    3.75 
  -1   0  -3  178.43    3.67 
   0   1  -3  173.12    3.71 
   1  -1  -3  182.61    3.84 
   0  -1  -3  181.56    3.42 
   1   0  -3  184.44    3.79 
   0   1  -3  184.49    3.44 
   1   0   3  182.18    3.56 
  -1   1   3  173.10    3.76 
  -1   0   3  179.65    3.76 
   1  -1   3  178.44    3.28 
   0   1   3  180.06    3.89 
   0   1   3  188.45    3.82 
  -1   1   3  178.86    3.47 
  -1   0   3  180.48    3.67 
   1   1  -3    1.12    0.47 
  -1   2  -3    2.83    0.71 
   1  -2  -3    1.15    0.45 
   2  -1  -3    1.47    0.51 
  -2   1  -3    1.36    0.44 
  -1  -1  -3    0.74    0.34 
  -1   2  -3    0.91    0.35 
  -2   1  -3    0.93    0.45 
   1   1  -3    0.88    0.42 
   2  -1  -3    0.67    0.44 
  -1  -1  -3    0.72    0.45 
  -1   2  -3    1.39    0.41 
  -2   1   3    1.64    0.43 
   2  -1   3    0.95    0.34 
   1   1   3    0.59    0.38 
  -1   2   3    1.19    0.17 
  -2   1   3    1.08    0.42 
  -1   2   3    1.53    0.46 
  -1   2   3    0.78    0.51 
  -1  -1   3    0.66    0.35 
  -1  -1   3    1.42    0.49 
  -2   0  -3  237.77    4.90 
   0   2  -3  241.29    4.91 
   2   0  -3  239.25    4.77 
  -2   2  -3  241.89    5.12 
   0   2  -3  231.94    4.86 
   2   0  -3  243.92    5.11 
   0  -2  -3  249.22    4.27 
   2  -2  -3  242.04    4.78 
  -2   2  -3  238.82    4.59 
   0  -2  -3  247.91    4.97 
  -2   0  -3  242.01    4.70 
   2  -2  -3  233.66    5.30 
   0   2   3  241.13    5.19 
   0  -2   3  234.75    5.15 
   0   2   3  237.59    4.93 
   2  -2   3  238.81    4.73 
   2   0   3  241.55    4.92 
  -2   0   3  241.84    4.60 
  -2   0   3  245.21    5.01 
  -2   2   3  239.32    5.00 
  -2   2   3  243.32    4.52 
   2  -3  -3   25.98    1.18 
  -2   3  -3   26.54    1.38 
   1   2  -3   28.40    1.32 
   3  -1  -3   28.00    1.10 
  -1  -2  -3   28.10    1.28 
  -3   1  -3   28.20    1.36 
  -2   3  -3   28.49    1.12 
   3  -1  -3   28.52    1.45 
   1   2  -3   29.94    1.35 
  -3   1  -3   27.56    1.00 
  -1  -2  -3   27.11    1.01 
  -2   3  -3   23.37    1.18 
   1   2   3   27.61    1.22 
  -2   3   3   27.39    1.31 
  -2   3   3   27.75    0.79 
   1   2   3   25.09    1.31 
   3  -1   3   26.47    1.18 
  -3   1   3   25.84    1.26 
  -2   3   3   24.01    1.48 
  -3   1   3   28.47    1.16 
  -1  -2   3   26.34    1.37 
   2  -3   3   27.77    1.24 
  -2  -1  -3  146.16    3.38 
  -1   3  -3  149.56    3.56 
   3  -2  -3  151.67    3.90 
   1  -3  -3  147.85    3.51 
  -1   3  -3  150.95    3.46 
   3  -2  -3  146.34    3.35 
  -3   2  -3  145.31    3.64 
  -1   3  -3  143.26    3.85 
   2   1  -3  147.56    3.47 
   2   1  -3  150.78    3.72 
  -3   2  -3  147.48    3.04 
  -2  -1  -3  144.68    3.37 
  -3   2   3  145.36    3.48 
  -3   2   3  146.48    3.34 
   3  -2   3  145.91    3.42 
  -2  -1   3  147.93    3.63 
  -1   3   3  137.95    3.47 
  -1   3   3  155.40    3.95 
  -2  -1   3  151.38    2.86 
   2   1   3  150.23    3.63 
   3  -3  -3    0.48    0.35 
   3   0  -3    0.68    0.39 
  -3   3  -3    0.22    0.28 
  -3   0  -3   -0.30    0.36 
   3   0  -3   -0.14    0.44 
   0  -3  -3   -0.39    0.36 
  -3   3  -3    0.28    0.41 
   0  -3  -3   -0.02    0.20 
  -3   3  -3   -0.09    0.36 
   3  -3  -3    0.02    0.42 
  -3   0  -3    0.15    0.31 
   0   3  -3   -0.16    0.37 
   0   3  -3   -0.50    0.31 
   0   3   3    0.23    0.36 
   0  -3   3    0.07    0.41 
  -3   0   3   -0.29    0.24 
   0   3   3    0.17    0.48 
   3  -3   3    0.20    0.36 
  -3   0   3    0.48    0.46 
   3   0   3   -0.09    0.41 
  -3   3   3   -0.04    0.28 
  -3   3   3   -0.14    0.42 
  -4   1  -3  113.05    2.56 
   3  -4  -3  113.95    2.84 
  -4   1  -3  108.12    3.21 
   1   3  -3  109.20    3.15 
  -1  -3  -3  107.10    3.06 
  -3   4  -3  108.88    3.13 
   4  -1  -3  109.84    2.68 
   3  -4  -3  116.16    3.70 
  -1  -3  -3  112.34    2.60 
   1   3  -3  108.78    3.28 
  -3   4  -3  108.41    2.67 
   4  -1  -3  113.12    3.46 
  -3   4  -3  106.62    3.22 
   1   3   3  110.35    3.38 
   1   3   3  107.27    2.83 
  -3   4   3  104.54    3.12 
  -4   1   3  106.28    2.74 
   3  -4   3  111.37    3.17 
  -1  -3   3  108.49    3.16 
  -4   1   3  111.85    3.19 
  -3   4   3  108.71    2.46 
   4  -1   3  109.82    3.14 
  -2  -2  -3    6.63    0.86 
  -2  -2  -3    5.62    0.69 
  -2   4  -3    6.13    1.01 
  -4   2  -3    5.80    0.61 
   2   2  -3    3.21    0.69 
   2  -4  -3    4.07    0.70 
   2   2  -3    4.82    0.86 
   4  -2  -3    4.65    0.87 
  -2   4  -3    6.04    0.79 
   4  -2  -3    5.40    0.60 
  -2   4  -3    4.36    0.71 
  -4   2  -3    5.32    0.90 
  -2   4  -3    4.02    0.77 
  -2   4   3    8.89    1.24 
  -4   2   3    4.93    0.72 
   4  -2   3    5.33    0.81 
  -2  -2   3    5.53    0.88 
  -4   2   3    4.85    0.77 
   2   2   3    5.52    0.76 
  -2   4   3    5.47    0.39 
   2   2   3    4.79    0.81 
  -2   4   3    3.96    0.71 
   1  -4  -3  213.77    3.67 
   3   1  -3  206.51    5.15 
   4  -3  -3  208.46    4.44 
  -3  -1  -3  203.87    4.54 
  -4   3  -3  213.66    4.94 
   4  -3  -3  206.11    5.38 
  -1   4  -3  203.48    4.42 
  -1   4  -3  205.60    5.11 
  -1   4  -3  205.35    4.71 
  -3  -1  -3  199.82    4.67 
  -4   3  -3  199.98    4.93 
   3   1  -3  213.84    4.69 
  -4   3  -3  209.76    3.89 
  -1   4  -3  201.80    5.02 
   1  -4  -3  199.86    4.71 
  -1   4   3  208.46    4.76 
  -4   3   3  212.03    4.87 
   4  -3   3  208.28    4.83 
  -3  -1   3  213.00    3.84 
   3   1   3  199.57    4.94 
  -3  -1   3  201.22    4.91 
  -1   4   3  204.78    5.32 
  -4   3   3  203.13    4.56 
   4  -4  -3  159.98    4.69 
   4   0  -3  168.03    3.83 
  -4   0  -3  165.21    4.26 
  -4   4  -3  161.05    4.27 
   0   4  -3  162.18    4.16 
   4  -4  -3  165.28    3.66 
   0  -4  -3  167.06    4.18 
  -4   4  -3  163.30    4.29 
  -4   4  -3  169.07    3.41 
   0   4  -3  159.66    4.36 
  -4   0  -3  162.94    3.74 
   0  -4  -3  161.54    3.30 
   4   0  -3  164.49    4.88 
   4   0   3  162.00    4.35 
  -4   0   3  166.88    3.50 
  -4   4   3  156.40    4.23 
   4  -4   3  160.29    4.18 
   0   4   3  172.67    4.63 
  -4   0   3  164.67    4.33 
  -4   4   3  165.06    3.75 
   0  -4   3  163.42    4.27 
   0   4   3  172.31    3.97 
   4  -5  -3    0.82    0.41 
  -5   1  -3    0.50    0.33 
  -5   1  -3   -0.58    0.47 
   4  -5  -3    0.27    0.71 
  -4   5  -3    0.35    0.54 
  -1  -4  -3    0.14    0.35 
  -1  -4  -3   -0.03    0.41 
   1   4  -3   -0.05    0.50 
  -4   5  -3    0.49    0.46 
   1   4  -3    0.66    0.57 
   5  -1  -3    0.39    0.38 
  -4   5  -3    0.26    0.34 
   5  -1  -3    1.20    0.71 
   5  -1   3    0.32    0.61 
   1   4   3    0.26    0.54 
  -5   1   3    0.19    0.39 
  -4   5   3    0.71    0.53 
  -4   5   3    1.02    0.40 
   4  -5   3    0.99    0.59 
   1   4   3    0.05    0.37 
  -1  -4   3    0.32    0.52 
  -5   1   3   -0.42    0.48 
   2   3  -3  168.18    4.59 
  -2  -3  -3  150.49    4.09 
   2   3  -3  160.83    4.19 
  -5   2  -3  156.20    4.31 
   5  -2  -3  153.20    4.59 
  -3   5  -3  159.64    4.34 
  -3   5  -3  160.18    3.78 
   3  -5  -3  153.81    3.86 
  -3   5  -3  155.59    4.46 
  -2  -3  -3  155.76    3.72 
   5  -2  -3  152.25    3.39 
  -3   5  -3  161.11    4.15 
  -5   2  -3  163.83    3.27 
  -3   5   3  154.82    4.18 
   2   3   3  162.12    3.73 
  -3   5   3  156.62    3.35 
  -5   2   3  150.43    3.85 
  -3   5   3  155.99    4.83 
  -2  -3   3  152.92    4.19 
   5  -2   3  151.09    4.16 
  -5   2   3  153.05    4.15 
   2   3   3  163.73    4.54 
   3   2  -3  126.84    3.49 
  -2   5  -3  124.89    3.39 
   5  -3  -3  125.53    4.04 
  -2   5  -3  128.08    3.37 
   2  -5  -3  126.14    2.47 
   5  -3  -3  125.93    2.82 
   2  -5  -3  123.43    3.41 
  -2   5  -3  129.40    3.89 
  -2   5  -3  123.41    3.87 
  -5   3  -3  127.45    3.77 
  -3  -2  -3  130.66    3.45 
  -3  -2  -3  122.80    3.40 
   3   2  -3  131.24    3.93 
  -5   3  -3  127.62    2.43 
  -5   3   3  120.85    3.45 
   3   2   3  122.34    3.80 
  -2   5   3  125.39    4.15 
  -3  -2   3  122.16    3.69 
  -2   5   3  132.69    3.58 
   3   2   3  118.99    3.32 
   5  -3   3  124.30    3.62 
  -5   3   3  122.29    3.50 
  -4  -1  -3    5.25    0.85 
  -5   4  -3    2.45    0.70 
  -5   4  -3    4.82    0.92 
   5  -4  -3    3.51    0.93 
  -1   5  -3    2.93    0.73 
  -1   5  -3    4.18    0.66 
  -5   4  -3    4.65    0.42 
   4   1  -3    6.24    1.22 
   4   1  -3    3.98    0.72 
   1  -5  -3    4.37    0.44 
  -4  -1  -3    6.22    0.83 
   5  -4  -3    4.32    0.68 
  -1   5  -3    2.55    0.79 
   1  -5  -3    4.13    0.86 
  -5   4   3    3.64    0.68 
   1  -5   3    4.32    0.88 
  -5   4   3    5.03    0.94 
  -4  -1   3    3.30    0.88 
  -4  -1   3    4.56    0.45 
  -1   5   3    4.35    1.03 
   5  -4   3    4.16    0.83 
  -1   5   3    5.02    0.81 
   4   1   3    5.11    0.94 
   0  -5  -3   81.92    2.96 
   0   5  -3   82.95    3.23 
   5   0  -3   81.85    2.59 
   0  -5  -3   90.10    2.25 
   0   5  -3   83.79    2.96 
  -5   5  -3   88.00    3.10 
   5  -5  -3   87.19    3.51 
  -5   5  -3   88.82    2.15 
  -5   0  -3   91.95    2.57 
  -5   0  -3   88.63    3.09 
   0   5  -3   86.30    2.33 
   5   0  -3   90.70    3.43 
  -5   5  -3   87.42    3.09 
   5  -5  -3   90.43    2.45 
  -5   5   3   85.44    3.07 
   0   5   3   90.98    3.42 
  -5   5   3   87.59    2.61 
  -5   0   3   89.19    2.31 
   0  -5   3   84.38    3.00 
   0   5   3   87.12    2.69 
   5   0   3   90.95    3.24 
   5  -5   3   89.01    3.02 
  -5   0   3   89.89    3.23 
  -1  -5  -3   94.52    2.62 
  -5   6  -3   90.96    3.30 
  -6   1  -3   93.37    2.55 
   6  -1  -3   91.20    3.66 
  -1  -5  -3   98.71    3.37 
   1   5  -3   93.96    3.63 
  -5   6  -3   96.21    2.54 
   1   5  -3   97.27    3.37 
   6  -1  -3   94.22    2.67 
   5  -6  -3   84.53    3.71 
   5  -6  -3   98.09    2.73 
  -5   6  -3   92.04    3.36 
  -6   1  -3   90.13    3.36 
   5  -6   3   93.50    3.39 
   1   5   3   93.28    3.66 
  -5   6   3   88.78    3.31 
   6  -1   3   88.02    3.37 
   1   5   3   97.56    2.82 
  -5   6   3   96.65    2.76 
  -6   1   3   90.55    3.34 
  -6   1   3   93.84    2.73 
  -1  -5   3   87.74    3.17 
   4  -6  -3   88.37    3.74 
  -2  -4  -3   88.03    2.65 
   2   4  -3   93.01    3.50 
   2   4  -3   92.96    3.22 
  -4   6  -3   89.05    3.12 
   6  -2  -3   93.56    3.61 
   4  -6  -3   88.44    2.77 
  -2  -4  -3   87.33    3.10 
  -4   6  -3   91.78    2.67 
  -6   2  -3   84.98    3.24 
  -6   2  -3   90.60    2.17 
   6  -2  -3   94.70    2.42 
  -4   6  -3   89.09    3.30 
   6  -2   3   88.21    3.19 
   4  -6   3   91.33    3.30 
  -4   6   3   90.58    3.19 
  -4   6   3   92.42    2.53 
  -6   2   3   92.89    2.83 
  -6   2   3   88.90    3.20 
   2   4   3   93.95    2.62 
  -2  -4   3   93.31    3.21 
   2   4   3   89.95    3.40 
  -3   6  -3   -0.40    0.37 
   3  -6  -3   -0.63    0.38 
  -3   6  -3   -0.47    0.57 
   3   3  -3    0.17    0.54 
  -3  -3  -3   -0.13    0.47 
   3   3  -3    0.03    0.62 
  -3  -3  -3    0.65    0.52 
   6  -3  -3    0.48    0.66 
   6  -3  -3    0.15    0.29 
  -3   6  -3   -0.16    0.41 
  -3   6  -3    0.48    0.64 
  -6   3  -3   -0.25    0.51 
  -6   3   3   -0.34    0.43 
  -3   6   3   -0.34    0.43 
  -6   3   3   -0.53    0.41 
   3   3   3    0.38    0.70 
   6  -3   3   -0.26    0.55 
   3   3   3    0.16    0.42 
  -3  -3   3    0.24    0.62 
  -3   6   3    0.47    0.71 
  -3   6   3    0.27    0.28 
   6  -4  -3   54.55    2.73 
  -4  -2  -3   59.94    2.36 
  -2   6  -3   58.45    2.58 
  -4  -2  -3   54.87    2.23 
   4   2  -3   60.80    2.38 
   2  -6  -3   55.86    2.33 
  -6   4  -3   60.99    2.55 
  -2   6  -3   58.04    2.21 
  -2   6  -3   57.74    2.31 
  -2   6  -3   59.95    2.74 
   4   2  -3   55.94    2.65 
  -6   4  -3   57.21    2.55 
  -2   6   3   57.42    2.34 
  -4  -2   3   56.62    2.59 
  -6   4   3   59.39    2.33 
   6  -4   3   58.30    2.52 
  -2   6   3   58.41    2.98 
   4   2   3   55.33    2.58 
  -6   4   3   52.73    2.36 
   5   1  -3   74.80    2.61 
  -6   5  -3   75.17    3.00 
  -1   6  -3   72.88    2.34 
  -5  -1  -3   69.84    2.47 
  -1   6  -3   69.13    2.73 
   1  -6  -3   71.70    2.80 
  -6   5  -3   77.68    3.00 
   5   1  -3   73.66    3.19 
  -5  -1  -3   70.13    2.77 
  -1   6  -3   72.04    3.14 
   6  -5  -3   74.37    3.35 
  -6   5   3   74.76    2.92 
  -5  -1   3   72.83    2.99 
  -1   6   3   77.41    2.67 
  -1   6   3   71.07    3.21 
   6  -5   3   75.57    2.95 
   5   1   3   69.11    2.98 
  -6   5   3   72.84    2.58 
   1  -6   3   74.85    2.82 
   6   0  -3    0.43    0.50 
   0   6  -3   -0.11    0.57 
   0  -6  -3   -0.36    0.51 
   6  -6  -3   -0.60    0.61 
  -6   6  -3    0.20    0.70 
   0   6  -3    0.15    0.69 
   6   0  -3    0.06    0.91 
  -6   0  -3    0.05    0.39 
  -6   6  -3   -0.03    0.59 
  -6   0  -3   -0.03    0.68 
   6  -6   3    0.22    0.69 
  -6   0   3   -0.06    0.60 
   0  -6   3    0.20    0.57 
   6   0   3    1.06    0.81 
   0   6   3   -0.57    0.70 
  -6   6   3   -0.38    0.60 
  -6   6   3   -0.23    0.44 
   0   6   3    0.29    0.45 
   1   6  -3   85.68    3.48 
   7  -1  -3   96.51    4.08 
  -7   1  -3   92.86    3.64 
  -6   7  -3   93.55    3.68 
  -1  -6  -3   95.40    3.61 
   1   6  -3   96.16    3.98 
   6  -7  -3   86.15    4.07 
  -6   7  -3   94.27    3.60 
   7  -1   3   97.57    3.84 
  -6   7   3  101.07    3.15 
  -7   1   3   87.80    3.59 
   1   6   3   96.05    2.94 
   1   6   3   92.27    3.94 
   6  -7   3   99.97    3.75 
  -6   7   3   91.27    3.60 
  -1  -6   3   94.60    3.42 
  -5   7  -3    0.47    0.71 
  -5   7  -3    0.44    0.73 
  -5   7  -3    0.21    0.47 
   5  -7  -3    0.30    0.94 
   2   5  -3    0.33    0.79 
   2   5  -3    0.59    0.72 
   7  -2  -3    1.13    0.86 
  -2  -5  -3    0.80    0.56 
   5  -7  -3    1.13    0.58 
  -7   2  -3    0.66    0.69 
  -2  -5  -3    0.79    0.62 
   2   5   3    2.43    0.87 
  -2  -5   3   -0.02    0.68 
  -7   2   3    0.36    0.54 
  -7   2   3    1.60    0.84 
   7  -2   3    1.00    0.73 
   5  -7   3    0.10    0.67 
   2   5   3    1.04    0.48 
  -5   7   3    0.24    0.73 
   3   4  -3   85.88    3.25 
   4  -7  -3   88.17    2.98 
  -4   7  -3   85.05    2.82 
  -4   7  -3   88.80    3.21 
  -7   3  -3   84.65    3.38 
  -4   7  -3   87.38    3.49 
  -3  -4  -3   91.55    3.30 
  -3  -4  -3   85.60    2.88 
   7  -3  -3   86.83    3.77 
   3   4  -3   91.69    3.72 
  -4   7   3   86.99    3.95 
  -7   3   3   86.64    3.02 
   3   4   3   87.27    2.53 
  -4   7   3   86.07    3.27 
   3   4   3   83.11    3.57 
  -7   3   3   80.10    3.19 
   4  -7   3   88.88    3.56 
  -3  -4   3   83.28    3.28 
   7  -3   3   85.70    3.35 
  -3   7  -3   87.40    3.04 
   4   3  -3   88.65    3.23 
   7  -4  -3   81.04    3.63 
  -3   7  -3   89.75    3.48 
  -3   7  -3   86.22    2.99 
   4   3  -3   92.15    3.80 
  -7   4  -3   85.28    3.44 
  -4  -3  -3   90.64    3.12 
  -7   4  -3   86.66    3.33 
   3  -7  -3   85.16    3.06 
  -4  -3  -3   90.99    3.18 
  -3   7  -3   86.07    3.64 
  -4  -3   3   88.07    3.40 
   4   3   3   86.51    3.51 
   7  -4   3   90.49    3.42 
  -7   4   3   83.81    3.13 
  -7   4   3   86.80    3.19 
  -3   7   3   83.27    3.14 
  -3   7   3   95.65    4.08 
   4   3   3   85.70    2.63 
  -2   7  -3    0.19    0.68 
  -5  -2  -3   -0.11    0.61 
   5   2  -3    0.39    0.73 
  -2   7  -3    0.10    0.52 
  -7   5  -3   -0.29    0.66 
   2  -7  -3    0.09    0.56 
   5   2  -3   -0.42    0.48 
   7  -5  -3   -0.32    0.78 
  -2   7  -3   -0.94    0.51 
  -5  -2  -3   -0.73    0.45 
  -7   5  -3    0.71    0.75 
  -2   7   3    0.29    0.56 
   7  -5   3   -0.60    0.65 
   5   2   3    0.32    0.73 
  -7   5   3   -0.38    0.48 
  -2   7   3   -0.17    0.68 
  -5  -2   3    0.59    0.76 
   2  -7   3    0.28    0.65 
  -7   5   3   -0.48    0.63 
  -6  -1  -3   85.69    2.98 
  -7   6  -3   96.79    3.72 
   7  -6  -3   89.90    3.97 
  -1   7  -3   82.56    3.72 
  -1   7  -3   88.70    2.83 
  -7   6  -3   95.51    3.63 
  -6  -1  -3   91.72    3.48 
  -1   7  -3   89.79    3.42 
   6   1  -3   98.84    4.08 
   1  -7  -3   83.88    3.36 
   6   1  -3   91.98    3.13 
   7  -6   3   91.07    3.57 
  -7   6   3   91.92    3.18 
  -1   7   3   90.91    3.98 
  -7   6   3   96.60    3.64 
  -1   7   3   90.55    3.12 
   1  -7   3   89.56    3.34 
  -6  -1   3   88.46    3.61 
   6   1   3   93.47    3.72 
   7  -7  -3   62.65    3.57 
   0  -7  -3   66.65    3.07 
  -7   7  -3   62.28    3.00 
   7   0  -3   64.06    2.46 
  -7   7  -3   59.44    3.01 
   7   0  -3   58.24    3.30 
   0   7  -3   63.80    2.98 
   0   7  -3   57.34    3.25 
  -7   0  -3   59.73    2.95 
   0  -7   3   59.67    2.74 
   7  -7   3   61.01    2.98 
  -7   7   3   62.90    2.60 
  -7   7   3   59.93    2.96 
   7   0   3   55.98    2.97 
   0   7   3   63.36    2.48 
  -7   0   3   63.91    3.17 
   0   7   3   63.84    3.41 
   1   7  -3    5.08    1.44 
  -1  -7  -3    5.60    1.24 
   1   7  -3    2.35    1.00 
  -7   8  -3    2.00    1.00 
   8  -1  -3    2.58    1.44 
   7  -8  -3    1.31    1.11 
  -7   8  -3    3.33    1.20 
  -8   1  -3    4.34    1.18 
  -8   1   3    3.18    1.23 
   8  -1   3    3.89    1.32 
  -1  -7   3    3.28    1.04 
   7  -8   3    2.77    1.07 
   1   7   3    3.97    1.29 
  -7   8   3    6.42    1.39 
  -6   8  -3   69.27    3.26 
  -8   2  -3   64.57    3.20 
  -6   8  -3   60.16    3.04 
   6  -8  -3   64.60    3.75 
   2   6  -3   57.50    2.95 
   8  -2  -3   63.35    3.53 
   2   6  -3   63.25    3.46 
  -2  -6  -3   60.46    2.99 
   8  -2   3   59.88    3.18 
  -8   2   3   62.70    3.14 
  -6   8   3   58.54    3.00 
   6  -8   3   59.39    3.09 
   2   6   3   61.95    3.41 
  -2  -6   3   62.58    2.90 
  -8   3  -3   74.71    3.40 
  -3  -5  -3   78.11    3.26 
  -5   8  -3   79.49    3.66 
  -5   8  -3   78.71    3.26 
   3   5  -3   70.86    3.15 
   5  -8  -3   79.62    2.87 
   5  -8  -3   74.66    3.89 
  -3  -5  -3   74.82    2.87 
   8  -3  -3   72.93    3.72 
   3   5  -3   71.12    3.58 
  -3  -5   3   69.99    3.13 
   3   5   3   72.23    3.53 
   5  -8   3   77.72    2.79 
  -5   8   3   78.58    3.35 
   8  -3   3   70.56    3.31 
  -8   3   3   72.38    2.91 
   5  -8   3   76.97    3.51 
  -8   3   3   79.74    3.39 
  -4   8  -3    1.83    1.04 
   4   4  -3    1.76    0.90 
   8  -4  -3    0.72    1.03 
   4   4  -3    1.08    1.04 
   4  -8  -3    1.33    0.73 
  -4  -4  -3   -0.10    0.69 
  -8   4  -3    2.53    0.97 
  -4   8  -3    1.11    0.85 
  -4   8  -3    2.12    0.74 
  -4  -4  -3    2.67    0.86 
  -4   8  -3    1.79    0.85 
  -8   4   3    2.69    0.89 
  -4   8   3    1.88    1.17 
  -4  -4   3    1.01    0.92 
  -8   4   3    2.05    0.87 
   8  -4   3    1.88    0.96 
  -4   8   3    2.90    0.97 
   4   4   3    2.01    0.95 
  -5  -3  -3   85.10    3.26 
   5   3  -3   80.08    3.82 
  -3   8  -3   80.80    3.82 
   8  -5  -3   87.16    4.02 
  -5  -3  -3   80.74    3.20 
  -3   8  -3   84.09    3.11 
  -3   8  -3   78.73    3.14 
  -8   5  -3   81.26    3.56 
   5   3  -3   81.49    3.23 
  -8   5  -3   76.77    3.37 
   3  -8  -3   80.04    3.23 
  -8   5   3   80.39    3.30 
  -8   5   3   76.97    3.22 
  -3   8   3   82.36    4.14 
   5   3   3   82.42    3.67 
  -5  -3   3   89.63    3.62 
   8  -5   3   76.12    3.40 
   3  -8   3   77.19    3.26 
  -3   8   3   82.29    3.26 
   6   2  -3   94.05    3.40 
  -2   8  -3   88.89    3.54 
   6   2  -3   89.23    4.12 
   8  -6  -3   94.12    4.28 
  -6  -2  -3   96.57    3.73 
  -6  -2  -3   90.37    3.27 
  -8   6  -3  100.17    3.91 
   2  -8  -3   95.28    3.64 
  -8   6  -3   91.95    3.81 
  -2   8  -3   93.14    3.16 
  -2   8  -3   94.12    4.19 
   8  -6   3   94.12    3.83 
  -6  -2   3   97.97    3.94 
   6   2   3   88.96    3.89 
  -2   8   3   94.07    4.40 
  -8   6   3   90.97    3.42 
   2  -8   3   88.53    3.48 
  -2   8   3   97.29    3.43 
  -8   6   3   94.78    3.74 
   1  -8  -3    0.93    0.83 
  -8   7  -3    2.16    1.09 
  -1   8  -3   -0.20    0.90 
  -7  -1  -3    0.35    0.78 
  -8   7  -3    0.96    0.87 
  -7  -1  -3    1.40    0.69 
  -1   8  -3    1.02    0.89 
   7   1  -3   -0.57    1.01 
   7   1  -3    1.14    0.75 
   8  -7  -3    1.12    1.17 
  -1   8   3    1.50    1.07 
   7   1   3    0.43    1.04 
  -7  -1   3    0.66    0.95 
   8  -7   3    2.13    1.06 
   1  -8   3   -0.06    0.67 
  -8   7   3    0.43    0.77 
  -8   7   3    2.04    1.06 
  -1   8   3    1.06    0.70 
   0   8  -3   55.73    3.43 
   0   8  -3   48.77    2.83 
   8  -8  -3   53.14    3.54 
   8   0  -3   53.26    3.62 
  -8   8  -3   51.68    2.99 
   0  -8  -3   55.96    3.02 
  -8   8  -3   48.98    2.95 
  -8   0  -3   53.57    3.10 
   0   8   3   44.69    3.27 
   8  -8   3   56.83    3.09 
  -8   8   3   49.63    3.01 
   0  -8   3   51.69    2.68 
  -8   0   3   56.79    3.23 
   8   0   3   46.57    2.99 
   8  -9  -3   56.48    3.81 
  -8   9  -3   56.52    3.31 
   9  -1  -3   55.37    3.81 
  -9   1  -3   52.61    3.27 
  -1  -8  -3   61.97    3.34 
  -8   9  -3   56.78    3.18 
   1   8  -3   46.23    3.37 
   9  -1   3   57.92    3.54 
  -1  -8   3   54.91    2.88 
   8  -9   3   59.10    3.28 
  -8   9   3   56.16    3.19 
   1   8   3   49.32    3.37 
  -9   1   3   52.99    3.31 
  -1  -8   3   53.15    3.13 
   7  -9  -3   35.12    3.33 
  -9   2  -3   39.51    2.80 
   9  -2  -3   44.20    3.68 
   2   7  -3   41.06    3.06 
  -2  -7  -3   41.91    2.71 
  -7   9  -3   43.46    2.81 
   2   7  -3   38.97    2.65 
  -7   9  -3   45.37    2.81 
  -7   9   3   41.01    2.76 
  -9   2   3   40.52    2.81 
   9  -2   3   41.92    2.95 
   2   7   3   34.54    3.14 
   7  -9   3   42.53    2.83 
  -2  -7   3   38.26    2.48 
   3   6  -3    2.69    1.29 
   6  -9  -3    4.47    1.53 
  -6   9  -3    3.35    1.21 
  -3  -6  -3    1.68    0.94 
  -9   3  -3    3.43    1.12 
   9  -3  -3    3.34    1.48 
  -6   9  -3    3.80    1.16 
   3   6  -3    5.00    1.33 
  -3  -6   3    3.78    1.16 
   3   6   3    3.83    1.21 
   6  -9   3    2.33    1.18 
   9  -3   3    1.40    1.12 
  -9   3   3    3.43    1.23 
  -6   9   3    3.16    1.16 
   4   5  -3   54.59    2.94 
   9  -4  -3   62.25    3.65 
  -9   4  -3   55.18    3.16 
   5  -9  -3   61.97    2.74 
  -5   9  -3   53.59    2.85 
  -5   9  -3   52.81    3.06 
  -4  -5  -3   53.35    2.87 
  -4  -5  -3   61.61    2.76 
   4   5  -3   50.02    3.33 
   5  -9  -3   58.13    3.64 
   4   5   3   56.76    3.37 
   5  -9   3   59.58    3.34 
  -9   4   3   57.08    3.03 
   9  -4   3   55.36    3.05 
  -4  -5   3   62.79    3.14 
  -9   4   3   53.80    2.74 
  -5   9   3   57.96    3.04 
   4  -9  -3   39.51    2.38 
  -9   5  -3   36.46    2.54 
  -5  -4  -3   45.73    2.56 
   5   4  -3   40.01    2.49 
   9  -5  -3   39.48    3.00 
  -4   9  -3   37.87    2.90 
  -5  -4  -3   41.27    2.51 
  -4   9  -3   38.05    2.34 
   5   4  -3   37.54    2.81 
  -4   9  -3   39.61    2.56 
  -9   5   3   36.93    2.45 
  -4   9   3   40.12    3.66 
   9  -5   3   41.68    2.71 
  -5  -4   3   40.12    2.68 
  -4   9   3   41.14    2.48 
   4  -9   3   42.76    2.36 
   5   4   3   39.38    2.74 
  -9   5   3   42.04    2.47 
  -3   9  -3    0.85    0.73 
   6   3  -3    1.31    0.91 
  -3   9  -3   -0.20    1.01 
   3  -9  -3   -0.28    0.76 
  -6  -3  -3    0.67    0.76 
  -6  -3  -3    0.81    0.87 
   9  -6  -3    1.04    1.22 
  -9   6  -3    0.43    0.90 
   6   3  -3    0.29    1.01 
  -9   6  -3    1.16    0.98 
   3  -9   3    0.59    0.77 
  -6  -3   3   -1.61    0.81 
   6   3   3    1.05    1.11 
   9  -6   3    1.19    0.96 
  -3   9   3    0.62    1.04 
  -3   9   3   -1.33    0.60 
  -9   6   3    0.02    0.81 
  -9   6   3    1.15    0.87 
   7   2  -3   49.38    3.35 
   9  -7  -3   46.99    3.35 
  -2   9  -3   48.29    3.30 
  -7  -2  -3   53.79    2.61 
  -7  -2  -3   52.69    2.97 
  -9   7  -3   54.89    3.13 
   2  -9  -3   49.60    2.85 
   7   2  -3   53.34    2.71 
  -9   7  -3   49.61    3.04 
  -2   9   3   51.69    3.60 
  -7  -2   3   52.53    3.15 
  -9   7   3   48.09    2.65 
  -2   9   3   49.42    2.64 
   9  -7   3   52.73    3.12 
   2  -9   3   45.39    2.76 
   7   2   3   51.57    3.14 
  -9   7   3   55.71    3.16 
  -1   9  -3   55.64    3.60 
   9  -8  -3   56.28    3.67 
  -9   8  -3   58.75    3.38 
   8   1  -3   56.31    3.61 
  -9   8  -3   62.88    3.41 
   1  -9  -3   57.73    3.19 
  -8  -1  -3   54.78    3.15 
  -1   9   3   64.38    3.95 
   8   1   3   63.13    3.59 
  -9   8   3   59.02    3.36 
   9  -8   3   57.11    3.22 
   1  -9   3   58.17    3.24 
  -8  -1   3   57.05    3.38 
   9   0  -3   -1.79    0.98 
  -9   9  -3    1.00    0.97 
  -9   0  -3    0.10    0.87 
  -9   9  -3    1.93    1.18 
   0   9  -3   -0.56    1.11 
   0  -9  -3    1.95    1.04 
   9  -9  -3   -0.59    1.00 
   9   0   3   -0.02    1.11 
   0  -9   3   -0.44    0.79 
  -9   9   3    0.65    1.14 
  -9   0   3    0.95    1.11 
   0   9   3    1.35    1.10 
   9  -9   3    0.27    0.94 
   9 -10  -3   46.72    4.13 
   1   9  -3   42.63    3.96 
  10  -1  -3   48.54    4.29 
  -9  10  -3   45.83    3.23 
  -1  -9  -3   52.96    3.28 
  -9  10  -3   44.02    3.23 
 -10   1  -3   46.75    3.33 
  -9  10   3   41.25    3.57 
  -1  -9   3   44.89    3.10 
  10  -1   3   55.43    3.63 
   9 -10   3   51.41    3.34 
   1   9   3   46.40    4.14 
 -10   1   3   53.00    3.47 
  -2  -8  -3   -0.87    0.86 
  10  -2  -3   -1.68    1.05 
   8 -10  -3   -0.20    1.33 
 -10   2  -3    0.08    0.93 
   2   8  -3    1.54    1.29 
  -8  10  -3   -0.80    0.92 
  -8  10  -3   -1.37    0.75 
 -10   2   3    1.06    1.00 
  10  -2   3   -2.06    1.01 
  -2  -8   3   -0.50    0.72 
  -8  10   3    0.79    1.01 
   2   8   3    1.58    1.34 
   8 -10   3   -0.08    1.05 
  -3  -7  -3   62.24    3.46 
  -7  10  -3   62.24    3.39 
   3   7  -3   59.48    3.80 
   7 -10  -3   57.06    3.96 
 -10   3  -3   64.03    3.65 
  10  -3  -3   62.30    3.83 
  -7  10   3   64.84    3.53 
  -3  -7   3   64.05    3.26 
   7 -10   3   64.53    3.65 
 -10   3   3   66.48    3.60 
   3   7   3   63.58    3.88 
  -3  -7   3   59.42    3.30 
  10  -3   3   60.86    3.63 
  -4  -6  -3   59.40    3.32 
   6 -10  -3   56.20    3.88 
   4   6  -3   53.68    3.15 
 -10   4  -3   61.12    3.49 
  10  -4  -3   63.01    3.85 
  -6  10  -3   59.36    3.21 
   4   6  -3   58.71    3.82 
   4   6   3   53.08    3.49 
  10  -4   3   63.69    3.48 
   6 -10   3   55.50    3.54 
  -6  10   3   58.28    3.31 
  -4  -6   3   58.17    3.18 
 -10   4   3   52.50    3.19 
  -4  -6   3   61.36    3.31 
   5 -10  -3    0.58    1.26 
   5   5  -3    0.54    1.15 
  10  -5  -3    1.79    1.29 
   5   5  -3    0.70    0.90 
  -5  10  -3   -0.22    0.81 
   5 -10  -3    0.39    0.74 
  -5  -5  -3    0.85    0.90 
 -10   5  -3    0.70    1.09 
  10  -5   3    1.13    1.04 
 -10   5   3   -0.03    0.80 
 -10   5   3    0.50    0.95 
  -5  10   3    0.81    0.87 
   5 -10   3    1.59    1.13 
  -5  -5   3    0.29    1.01 
   5   5   3   -0.09    0.93 
   4 -10  -3   54.92    3.00 
 -10   6  -3   52.06    3.18 
   6   4  -3   58.23    3.04 
   6   4  -3   46.65    3.30 
  -4  10  -3   49.69    3.49 
  -6  -4  -3   54.63    2.94 
  -4  10  -3   53.64    2.84 
  -6  -4  -3   45.08    2.74 
  10  -6  -3   51.62    3.60 
  -6  -4   3   52.77    3.23 
   6   4   3   48.91    3.33 
  10  -6   3   56.45    3.33 
  -4  10   3   50.94    3.74 
  -4  10   3   53.77    3.03 
 -10   6   3   53.95    3.04 
   4 -10   3   53.67    2.91 
 -10   6   3   49.54    2.95 
   3 -10  -3   43.15    2.78 
   7   3  -3   44.94    3.45 
 -10   7  -3   47.57    3.03 
  -7  -3  -3   47.02    2.71 
  -7  -3  -3   51.94    3.08 
 -10   7  -3   50.06    3.15 
  -3  10  -3   46.22    3.48 
  10  -7  -3   54.06    3.72 
  -3  10   3   47.52    2.72 
   3 -10   3   44.99    2.80 
  -7  -3   3   45.73    3.17 
  10  -7   3   48.48    3.14 
  -3  10   3   47.71    3.72 
  -7  -3   3   50.61    2.80 
   7   3   3   49.06    3.39 
 -10   7   3   39.53    2.65 
 -10   7   3   49.45    3.00 
  -2  10  -3    0.81    1.29 
 -10   8  -3   -0.50    0.99 
 -10   8  -3   -0.15    1.02 
   2 -10  -3   -0.24    0.89 
  10  -8  -3   -0.82    1.01 
  -8  -2  -3    0.54    1.00 
   8   2  -3    2.05    1.25 
  -8  -2   3   -0.87    0.98 
 -10   8   3    0.66    1.04 
   8   2   3   -0.66    1.06 
  10  -8   3    0.36    0.99 
  -2  10   3    0.46    1.29 
   2 -10   3    0.03    0.85 
  -1  10  -3   55.77    3.89 
 -10   9  -3   50.27    3.33 
   9   1  -3   54.83    3.84 
  10  -9  -3   58.13    3.96 
   1 -10  -3   60.67    3.49 
 -10   9  -3   54.39    3.48 
  -9  -1  -3   51.37    3.39 
   9   1   3   54.64    3.65 
  -9  -1   3   55.09    3.48 
 -10   9   3   57.70    3.57 
   1 -10   3   57.74    3.44 
  10  -9   3   49.20    3.40 
  -1  10   3   55.60    3.92 
 -10   0  -3   35.16    3.35 
  10 -10  -3   35.11    3.66 
  10   0  -3   30.53    3.42 
 -10  10  -3   29.91    3.02 
   0  10  -3   24.43    3.28 
   0 -10  -3   30.79    2.99 
 -10  10  -3   29.91    3.04 
  10 -10   3   26.41    2.94 
 -10  10   3   27.53    2.99 
   0  10   3   34.40    3.76 
   0 -10   3   25.68    2.80 
  10   0   3   25.10    3.01 
 -10   0   3   29.23    3.17 
  -1 -10  -3   -0.08    1.20 
 -10  11  -3    1.04    1.28 
 -11   1  -3   -0.59    1.17 
  10 -11  -3    0.11    1.54 
   1  10  -3   -1.04    1.40 
  11  -1  -3   -0.42    1.59 
   1  10   3   -2.01    1.01 
 -11   1   3   -1.33    1.06 
 -10  11   3   -1.81    0.94 
  -1 -10   3    0.64    1.06 
  10 -11   3    0.65    1.22 
  11  -1   3   -0.78    1.24 
  -2  -9  -3   41.69    3.13 
   9 -11  -3   38.58    3.99 
   2   9  -3   37.40    3.96 
  -9  11  -3   41.52    3.62 
  11  -2  -3   45.47    4.26 
 -11   2  -3   41.83    3.84 
   9 -11   3   41.45    3.22 
   2   9   3   44.82    4.11 
 -11   2   3   43.68    3.79 
  -2  -9   3   41.15    3.59 
  11  -2   3   43.38    3.93 
  -9  11   3   38.18    3.43 
  11  -3  -3   45.24    4.14 
  -3  -8  -3   46.17    3.13 
  -8  11  -3   46.57    3.16 
   3   8  -3   37.82    3.80 
   8 -11  -3   41.70    4.06 
 -11   3  -3   40.25    3.55 
   8 -11   3   43.07    3.31 
   3   8   3   46.62    4.08 
  11  -3   3   32.72    3.31 
  -3  -8   3   40.80    2.97 
  -8  11   3   43.48    3.13 
 -11   3   3   34.71    3.25 
 -11   4  -3    0.43    1.09 
  -4  -7  -3    0.63    0.97 
  -7  11  -3    1.29    1.10 
   4   7  -3    1.79    1.21 
   7 -11  -3    2.51    1.53 
  11  -4  -3   -0.74    1.43 
  -4  -7   3    2.90    1.19 
  -4  -7   3   -0.79    0.76 
   4   7   3    1.33    1.34 
   7 -11   3    0.52    1.08 
  -7  11   3    0.26    0.96 
 -11   4   3    0.63    1.13 
  11  -4   3    0.98    1.29 
 -11   5  -3   34.71    3.22 
  11  -5  -3   37.12    3.60 
  -5  -6  -3   41.58    2.84 
   6 -11  -3   34.97    3.68 
   5   6  -3   34.41    3.64 
  -6  11  -3   37.56    2.74 
 -11   5   3   33.35    3.13 
  -5  -6   3   35.84    3.11 
  -6  11   3   34.96    3.00 
  -5  -6   3   36.22    2.71 
  11  -5   3   29.47    2.93 
   5   6   3   38.87    3.58 
   6 -11   3   38.17    3.48 
  11  -6  -3   53.07    3.95 
  -6  -5  -3   58.35    3.30 
 -11   6  -3   57.85    3.54 
   6   5  -3   56.94    3.92 
  -5  11  -3   57.92    3.24 
  -5  11   3   70.20    4.61 
  -6  -5   3   52.25    3.18 
   6   5   3   53.69    3.71 
  -6  -5   3   59.38    3.49 
 -11   6   3   49.08    3.18 
   5 -11   3   56.47    3.74 
 -11   6   3   55.00    3.27 
  11  -6   3   54.35    3.44 
  -5  11   3   55.03    3.30 
  -4  11  -3    1.75    1.47 
  -7  -4  -3    2.04    1.16 
 -11   7  -3    2.77    1.27 
   4 -11  -3    2.74    1.21 
  11  -7  -3    2.64    1.53 
   7   4  -3    3.98    1.53 
  -7  -4  -3    1.46    1.19 
  -4  11   3    1.71    1.51 
 -11   7   3    4.28    1.39 
  -7  -4   3    2.58    1.17 
  -4  11   3    2.95    1.20 
   7   4   3    1.34    1.32 
   4 -11   3    2.07    1.15 
 -11   7   3    1.23    1.17 
  11  -7   3    2.78    1.43 
  -7  -4   3    2.24    1.38 
  11  -8  -3   35.65    3.75 
 -11   8  -3   35.11    3.30 
   3 -11  -3   32.69    3.03 
   8   3  -3   29.14    3.21 
  -3  11  -3   30.24    3.43 
 -11   8  -3   28.92    3.04 
  -8  -3  -3   31.51    3.02 
   3 -11   3   30.53    2.86 
  -8  -3   3   33.11    3.14 
   8   3   3   30.57    3.24 
  11  -8   3   32.14    3.16 
  -3  11   3   35.43    3.97 
 -11   8   3   29.38    2.96 
  11  -9  -3   38.05    3.87 
  -2  11  -3   35.28    3.76 
  -9  -2  -3   42.78    3.19 
   9   2  -3   39.24    3.78 
   2 -11  -3   35.09    3.25 
 -11   9  -3   42.82    3.25 
 -11   9  -3   43.05    3.68 
   2 -11   3   44.12    3.18 
 -11   9   3   37.90    3.35 
  11  -9   3   40.63    3.17 
  -9  -2   3   34.41    3.25 
   9   2   3   30.22    3.27 
  -2  11   3   33.86    3.75 
  -1  11  -3    0.19    1.40 
 -11  10  -3    1.42    1.29 
  11 -10  -3    2.83    1.77 
 -10  -1  -3    0.89    1.28 
 -11  10  -3    1.34    1.31 
   1 -11  -3   -0.53    1.08 
  10   1  -3   -0.43    1.26 
  11 -10   3    1.43    1.28 
  -1  11   3    0.31    1.54 
 -10  -1   3    0.74    1.22 
   1 -11   3    0.92    1.22 
  10   1   3    0.11    1.42 
 -11  10   3   -0.10    1.21 
  11 -11  -3   26.26    3.50 
 -11   0  -3   31.01    3.43 
   0  11  -3   18.53    3.06 
   0 -11  -3   23.96    3.02 
  11   0   3   26.19    3.28 
  11 -11   3   26.19    3.04 
   0 -11   3   27.18    3.04 
   2  10  -3   32.45    3.83 
  12  -2   3   28.02    3.50 
   3   9  -3   -0.43    1.30 
  -9  12  -3   -1.03    1.03 
  12  -3  -3   -0.84    1.73 
 -12   3  -3    0.11    1.34 
   9 -12  -3    0.23    1.68 
  -3  -9  -3    0.17    0.99 
  -9  12   3    1.30    1.25 
  -3  -9   3   -0.06    0.96 
   9 -12   3   -1.04    1.23 
  12  -3   3    0.36    1.62 
 -12   3   3    1.53    1.45 
   3   9   3    0.84    1.46 
  12  -4  -3   23.51    3.22 
  -4  -8  -3   36.64    3.40 
 -12   4  -3   29.67    3.24 
   8 -12  -3   26.62    3.45 
  -8  12  -3   28.38    3.00 
   4   8  -3   25.26    3.38 
  -4  -8   3   28.95    3.04 
 -12   4   3   29.24    3.23 
   4   8   3   25.34    3.21 
   8 -12   3   29.35    3.25 
  12  -4   3   36.97    3.77 
  -8  12   3   26.02    2.89 
  -7  12  -3   39.95    3.38 
  -5  -7  -3   42.80    3.58 
  12  -5  -3   37.19    3.91 
   7 -12  -3   38.52    4.13 
   5   7  -3   38.32    4.01 
 -12   5  -3   39.62    3.67 
 -12   5   3   41.42    3.62 
  12  -5   3   33.09    3.36 
  -7  12   3   37.89    3.33 
  -5  -7   3   43.60    3.18 
   5   7   3   36.54    3.64 
  -5  -7   3   36.77    3.31 
   7 -12   3   41.29    3.88 
   6 -12  -3   -1.05    1.06 
 -12   6  -3    0.72    1.07 
  -6  12  -3    0.21    1.17 
  -6  -6  -3    0.33    1.13 
  12  -6  -3    1.79    1.58 
   6   6  -3    1.24    1.50 
   6   6   3    0.88    1.44 
 -12   6   3   -0.66    1.04 
  12  -6   3    1.26    1.28 
  -6  12   3   -1.24    1.03 
  -6  -6   3    1.67    1.17 
  -6  -6   3   -0.31    1.21 
   6 -12   3   -0.71    1.21 
   7   5  -3   53.96    4.04 
 -12   7  -3   49.68    3.46 
  12  -7  -3   53.30    4.69 
  -7  -5  -3   55.65    3.47 
 -12   7   3   51.74    3.36 
   5 -12   3   50.61    3.88 
  -7  -5   3   48.86    3.52 
  -7  -5   3   50.32    3.36 
  -5  12   3   51.47    3.44 
  12  -7   3   50.88    3.58 
   7   5   3   60.14    4.13 
  -5  12   3   44.48    4.43 
 -12   7   3   48.91    3.42 
  -4  12  -3   31.07    3.72 
 -12   8  -3   31.75    3.33 
  -8  -4  -3   27.80    2.94 
   8   4  -3   27.85    3.37 
  12  -8  -3   30.72    3.68 
   4 -12  -3   33.74    3.13 
  -4  12   3   31.78    3.93 
   8   4   3   32.32    3.51 
  -8  -4   3   25.18    2.91 
 -12   8   3   28.87    2.97 
  12  -8   3   28.72    3.23 
   4 -12   3   33.24    3.13 
   9   3  -3    0.29    1.50 
 -12   9  -3    0.43    1.24 
   3 -12  -3    0.74    1.14 
  -9  -3  -3    2.18    1.38 
  12  -9  -3    0.50    1.65 
  -3  12  -3    0.36    1.60 
  -3  12   3    1.91    1.61 
   3 -12   3    4.26    1.53 
   9   3   3    2.32    1.64 
  -9  -3   3    3.06    1.60 
 -12   9   3    0.49    1.30 
  12  -9   3    1.16    1.46 
  -2  12  -3   38.18    4.08 
 -12  10  -3   35.85    3.54 
   2 -12  -3   30.20    3.15 
 -10  -2  -3   38.10    3.64 
  12 -10   3   34.90    3.67 
   2 -12   3   33.09    3.28 
  -8  13  -3    1.68    1.51 
  -6  -7  -3   20.94    2.71 
  13  -6   3   23.80    3.10 
  -6  -7   3   20.18    2.82 
 -13   6   3   24.95    3.08 
  -7  13   3   21.09    2.74 
  -7  -6  -3   26.47    2.88 
 -13   7   3   23.68    2.97 
  -7  -6   3   31.26    3.41 
  13  -7   3   15.95    2.51 
  -7  -6   3   26.23    3.00 
 -13   8   3   -2.14    1.21 
  13  -8   3    1.65    1.55 
   5 -13   3    2.21    1.43 
   0   0  -4  148.67    2.89 
   0   0  -4  148.80    3.39 
   0   0  -4  145.70    3.58 
   1  -1  -4   23.36    1.29 
   0   1  -4   25.26    0.75 
  -1   1  -4   25.81    1.24 
  -1   0  -4   23.82    1.07 
   0  -1  -4   24.10    1.18 
   1  -1  -4   25.65    1.11 
  -1   0  -4   23.96    1.18 
  -1   1  -4   27.02    1.31 
   1   0  -4   22.46    0.98 
   0   1  -4   20.35    1.20 
   0  -1  -4   24.89    0.98 
   0   1  -4   24.14    1.18 
   0   1   4   26.51    1.07 
   1   0   4   25.53    0.87 
  -1   1   4   24.22    1.20 
  -1   0   4   25.03    1.16 
   0   1   4   23.96    1.25 
  -1   1   4   24.61    0.96 
  -1   0   4   25.80    1.18 
   1   1  -4  208.65    4.36 
   1  -2  -4  209.49    4.48 
  -1   2  -4  215.58    4.08 
  -1   2  -4  212.00    4.40 
  -2   1  -4  218.56    4.55 
   1   1  -4  211.22    4.48 
   2  -1  -4  209.18    4.56 
  -1  -1  -4  204.75    4.44 
  -1  -1  -4  212.98    4.20 
   2  -1  -4  202.40    4.62 
  -2   1  -4  206.27    4.55 
  -1   2  -4  213.82    4.97 
   1   1   4  214.15    4.45 
  -1   2   4  217.32    3.82 
  -2   1   4  207.79    4.44 
  -2   1   4  208.47    4.35 
  -1  -1   4  205.54    4.31 
   2  -1   4  207.19    4.11 
  -1   2   4  206.17    4.57 
  -1  -1   4  203.30    4.65 
  -1   2   4  203.29    4.69 
   0  -2  -4  114.14    2.88 
  -2   2  -4  109.59    3.02 
   2  -2  -4  111.63    2.84 
   0   2  -4  112.08    2.62 
  -2   2  -4  107.68    2.64 
   2   0  -4  108.69    2.79 
   2   0  -4  112.23    2.90 
  -2   0  -4  110.32    2.81 
   0  -2  -4  107.16    2.22 
  -2   0  -4  108.74    2.70 
   2  -2  -4  109.41    3.05 
  -2   2   4  113.22    2.91 
   0   2   4  111.04    2.93 
   2  -2   4  110.34    2.41 
   2   0   4  111.40    2.68 
  -2   0   4  108.19    2.87 
  -2   0   4  107.84    2.57 
  -2   2   4  111.05    2.44 
   0  -2   4  110.51    3.11 
   0   2   4  112.17    2.95 
  -3   1  -4   59.87    2.09 
   3  -1  -4   58.03    1.85 
  -1  -2  -4   56.52    2.00 
  -1  -2  -4   60.46    1.65 
   2  -3  -4   58.56    1.93 
   1   2  -4   59.41    2.00 
  -3   1  -4   57.80    1.77 
   3  -1  -4   61.22    2.22 
   1   2  -4   59.14    2.04 
  -2   3  -4   59.75    1.82 
  -3   1   4   57.71    1.86 
  -2   3   4   59.07    2.28 
   2  -3   4   57.77    1.76 
   1   2   4   56.32    2.04 
  -2   3   4   61.21    1.34 
   3  -1   4   58.75    1.84 
   1   2   4   61.44    2.10 
  -3   1   4   58.42    1.98 
  -3   2  -4   35.78    1.44 
  -2  -1  -4   38.32    1.53 
   2   1  -4   33.92    1.50 
   3  -2  -4   35.34    1.54 
  -1   3  -4   36.37    1.80 
   1  -3  -4   39.47    1.59 
  -1   3  -4   36.10    1.49 
   2   1  -4   37.16    1.63 
  -1   3  -4   39.50    1.43 
  -2  -1  -4   36.06    1.43 
   3  -2  -4   35.83    1.73 
  -3   2  -4   34.33    1.58 
   3  -2   4   37.28    1.35 
  -3   2   4   38.20    1.43 
  -1   3   4   35.78    1.54 
  -2  -1   4   36.87    1.63 
  -3   2   4   35.67    1.52 
  -2  -1   4   38.24    1.18 
   2   1   4   36.06    1.52 
  -1   3   4   37.23    1.80 
  -3   0  -4  257.05    5.66 
   0  -3  -4  262.58    5.67 
   3  -3  -4  262.75    5.45 
   0   3  -4  255.01    5.63 
   0  -3  -4  269.27    4.71 
  -3   3  -4  264.20    5.14 
  -3   3  -4  248.29    5.82 
   3   0  -4  255.78    5.43 
   3  -3  -4  253.91    6.14 
  -3   0  -4  264.08    5.35 
   3   0  -4  267.43    5.98 
   0   3  -4  254.82    5.66 
  -3   0   4  262.00    5.80 
  -3   3   4  269.09    5.13 
   0   3   4  260.22    5.97 
  -3   3   4  271.09    5.80 
   3   0   4  262.58    5.67 
   0   3   4  260.53    5.58 
   3  -3   4  262.67    5.43 
  -3   0   4  264.72    5.16 
   0  -3   4  268.77    6.01 
   1   3  -4   28.38    1.57 
   4  -1  -4   25.61    1.73 
   4  -1  -4   27.45    1.31 
  -3   4  -4   28.82    1.27 
  -1  -3  -4   29.05    1.50 
   3  -4  -4   30.73    1.44 
  -4   1  -4   27.87    1.54 
  -4   1  -4   27.12    1.17 
   1   3  -4   28.63    1.59 
  -3   4  -4   30.24    1.67 
  -1  -3  -4   28.21    1.11 
   3  -4  -4   28.87    1.85 
   1   3   4   29.45    1.68 
  -3   4   4   27.67    0.98 
  -4   1   4   28.32    1.54 
  -4   1   4   28.79    1.31 
   4  -1   4   27.97    1.51 
  -3   4   4   26.62    1.54 
  -1  -3   4   28.26    1.65 
   3  -4   4   29.55    1.42 
   1   3   4   26.30    1.40 
   2   2  -4  113.16    3.39 
  -2  -2  -4  116.31    2.91 
   2   2  -4  114.87    3.24 
  -4   2  -4  118.00    3.45 
  -2   4  -4  119.07    3.21 
  -2  -2  -4  117.95    3.22 
   2  -4  -4  114.20    3.16 
  -4   2  -4  113.73    2.84 
  -2   4  -4  115.39    3.05 
   4  -2  -4  114.63    3.61 
  -2   4  -4  122.45    3.71 
   4  -2  -4  115.68    2.91 
  -2  -2   4  110.15    3.36 
  -2  -2   4  117.60    2.41 
  -4   2   4  110.49    3.09 
   4  -2   4  109.74    3.06 
  -2   4   4  117.72    3.34 
   2   2   4  112.75    3.29 
  -4   2   4  115.73    3.12 
   2   2   4  116.28    3.42 
  -2   4   4  115.94    3.75 
  -3  -1  -4   72.88    2.32 
   3   1  -4   74.84    2.42 
   4  -3  -4   68.27    2.75 
  -1   4  -4   72.57    2.75 
   3   1  -4   80.55    3.01 
  -3  -1  -4   74.46    2.37 
  -1   4  -4   70.40    2.40 
  -1   4  -4   70.52    2.44 
   4  -3  -4   72.83    2.33 
  -4   3  -4   72.29    1.88 
   1  -4  -4   69.87    2.45 
  -4   3  -4   73.29    2.60 
   3   1   4   73.17    2.52 
  -1   4   4   69.87    2.40 
  -3  -1   4   74.37    1.77 
   4  -3   4   72.07    2.32 
  -4   3   4   75.20    2.52 
  -4   3   4   67.30    2.15 
  -1   4   4   71.73    2.78 
  -3  -1   4   69.83    2.57 
   0   4  -4   33.36    1.70 
   4   0  -4   34.23    1.56 
  -4   0  -4   35.76    1.48 
   4   0  -4   31.96    1.87 
   0  -4  -4   31.73    1.69 
   4  -4  -4   35.53    2.07 
  -4   4  -4   35.53    1.83 
  -4   0  -4   32.43    1.70 
   4  -4  -4   34.61    1.50 
  -4   4  -4   33.62    1.26 
   0  -4  -4   33.90    1.01 
   0   4  -4   32.13    1.70 
  -4   0   4   34.26    1.81 
   0   4   4   34.73    1.91 
   0   4   4   34.32    1.62 
   0  -4   4   31.19    1.78 
   4  -4   4   33.84    1.61 
  -4   0   4   35.08    1.29 
  -4   4   4   32.47    1.33 
   4   0   4   30.72    1.64 
  -4   4   4   34.31    1.80 
   1   4  -4   94.02    3.29 
  -5   1  -4   94.85    2.52 
   4  -5  -4   91.99    2.71 
  -4   5  -4   91.45    3.08 
  -5   1  -4   92.14    3.15 
   5  -1  -4   88.39    3.34 
   4  -5  -4   93.06    3.66 
   1   4  -4   96.04    3.16 
   5  -1  -4   91.31    2.63 
  -4   5  -4   96.54    3.28 
  -4   5  -4   92.81    2.55 
  -1  -4  -4   92.49    3.10 
  -1  -4  -4   93.93    2.41 
   4  -5   4   94.70    2.98 
  -5   1   4   90.08    2.62 
  -4   5   4   94.91    2.38 
  -5   1   4   91.60    3.17 
   1   4   4   92.03    2.78 
   1   4   4   93.30    3.33 
   5  -1   4   91.05    3.07 
  -1  -4   4   85.22    3.06 
  -4   5   4   89.88    3.13 
  -2  -3  -4   17.32    1.46 
   5  -2  -4   15.41    0.95 
  -3   5  -4   15.66    1.09 
  -3   5  -4   14.13    1.60 
  -5   2  -4   11.96    1.31 
   2   3  -4   14.45    1.33 
   3  -5  -4   15.10    1.12 
   2   3  -4   15.74    1.54 
  -5   2  -4   12.78    0.90 
   5  -2  -4   16.75    1.72 
  -2  -3  -4   12.54    0.97 
  -3   5  -4   14.87    1.31 
  -3   5   4   14.32    1.58 
   3  -5   4   13.88    1.29 
  -2  -3   4   15.42    1.51 
   2   3   4   14.35    1.22 
  -3   5   4   15.86    1.42 
   2   3   4   12.52    1.33 
   5  -2   4   14.65    1.32 
  -5   2   4   14.58    1.10 
  -5   2   4   16.88    1.45 
  -3   5   4   14.47    0.70 
  -2   5  -4   39.49    1.75 
   2  -5  -4   41.38    1.87 
  -2   5  -4   37.45    2.15 
   3   2  -4   39.17    2.03 
  -3  -2  -4   39.56    1.81 
   5  -3  -4   38.87    2.17 
   5  -3  -4   39.63    1.51 
   3   2  -4   38.52    1.88 
  -2   5  -4   38.43    1.92 
  -5   3  -4   39.56    1.24 
  -5   3  -4   38.84    1.97 
  -3  -2  -4   42.38    1.76 
  -2   5  -4   35.78    1.70 
   5  -3   4   38.32    1.81 
  -5   3   4   40.61    1.87 
  -3  -2   4   38.32    1.99 
   3   2   4   42.85    2.00 
  -2   5   4   37.38    2.24 
   3   2   4   38.80    2.00 
  -5   3   4   35.38    1.73 
  -2   5   4   36.44    1.84 
   5  -4  -4  207.17    4.68 
  -5   4  -4  199.20    3.95 
  -4  -1  -4  198.97    4.94 
  -1   5  -4  203.81    4.99 
   1  -5  -4  202.87    5.07 
  -4  -1  -4  197.81    4.73 
  -5   4  -4  203.76    5.27 
  -1   5  -4  203.18    5.30 
   4   1  -4  204.57    5.49 
   4   1  -4  195.99    4.82 
   5  -4  -4  194.70    5.66 
   1  -5   4  204.00    5.39 
  -4  -1   4  200.95    5.26 
  -5   4   4  197.62    4.70 
   4   1   4  196.12    5.17 
  -5   4   4  198.62    5.11 
  -4  -1   4  205.44    3.94 
  -1   5   4  199.34    4.96 
   5  -4   4  196.67    4.94 
  -1   5   4  202.80    5.62 
  -5   5  -4   10.13    1.31 
   5   0  -4   13.26    1.66 
   5  -5  -4   12.69    1.61 
   5   0  -4   11.73    1.15 
  -5   0  -4   11.53    1.29 
   0  -5  -4   10.24    1.21 
  -5   0  -4   11.18    1.05 
   0   5  -4    9.54    1.29 
   5  -5  -4   11.51    1.07 
  -5   5  -4    9.08    1.19 
   0   5  -4   10.83    1.23 
  -5   5  -4   11.13    0.77 
   0   5   4   12.25    1.55 
   5   0   4   10.52    1.30 
   0   5   4   10.71    1.09 
  -5   5   4   10.92    1.37 
  -5   0   4   10.99    1.39 
  -5   5   4    9.71    0.96 
   5  -5   4   12.24    1.27 
   0  -5   4    9.59    1.21 
  -5   0   4   10.43    0.80 
  -6   1  -4   45.95    2.36 
  -6   1  -4   52.63    1.85 
   6  -1  -4   52.68    1.98 
   1   5  -4   45.05    2.30 
   6  -1  -4   53.44    2.75 
   1   5  -4   52.54    2.62 
  -1  -5  -4   47.81    2.35 
   5  -6  -4   48.60    2.85 
   5  -6  -4   49.55    1.97 
  -5   6  -4   49.97    2.44 
  -5   6  -4   56.28    2.66 
  -5   6  -4   50.95    1.81 
  -5   6   4   46.14    2.40 
   6  -1   4   50.92    2.50 
  -6   1   4   49.70    2.43 
   1   5   4   51.00    2.67 
   1   5   4   50.65    2.05 
  -1  -5   4   51.62    2.44 
  -6   1   4   51.25    1.93 
  -5   6   4   52.63    1.82 
   5  -6   4   54.39    2.39 
   6  -2  -4   37.64    1.55 
  -4   6  -4   39.22    1.70 
  -2  -4  -4   43.28    1.70 
  -6   2  -4   40.96    2.20 
   2   4  -4   37.39    1.99 
  -6   2  -4   39.49    1.43 
   4  -6  -4   40.10    1.83 
  -4   6  -4   41.22    2.27 
   6  -2  -4   38.19    2.36 
  -2  -4  -4   39.48    2.05 
  -4   6  -4   40.78    2.08 
   4  -6  -4   37.79    2.49 
   2   4  -4   41.52    2.33 
  -6   2   4   39.02    2.08 
  -4   6   4   40.85    2.13 
  -2  -4   4   39.57    2.09 
   2   4   4   41.11    1.71 
   4  -6   4   39.28    2.06 
   6  -2   4   40.23    2.08 
   2   4   4   39.21    2.27 
  -6   2   4   38.54    1.79 
  -3   6  -4   89.56    2.98 
  -3  -3  -4   88.72    2.80 
  -3   6  -4   90.15    2.84 
  -6   3  -4   85.11    3.29 
   6  -3  -4   87.32    3.57 
   3   3  -4   87.41    3.39 
   6  -3  -4   84.23    2.32 
  -3   6  -4   89.68    3.26 
  -3   6  -4   83.44    3.45 
   3   3  -4   87.25    3.07 
   3  -6  -4   86.94    2.91 
  -3  -3  -4   87.27    3.04 
  -3   6   4   84.94    3.67 
  -6   3   4   82.98    2.98 
   3   3   4   86.17    3.34 
  -3   6   4   87.96    3.12 
  -6   3   4   87.26    2.96 
  -3  -3   4   89.78    3.23 
   3   3   4   88.23    2.75 
   6  -3   4   85.97    3.06 
   4   2  -4   37.99    2.19 
  -2   6  -4   39.97    1.96 
  -4  -2  -4   37.94    1.85 
  -2   6  -4   37.01    2.10 
   2  -6  -4   33.41    1.86 
   6  -4  -4   40.97    1.52 
   6  -4  -4   38.49    2.40 
  -4  -2  -4   38.22    1.92 
  -2   6  -4   39.80    2.27 
  -2   6  -4   38.05    1.78 
   4   2  -4   38.79    1.94 
  -4  -2   4   37.77    2.15 
   4   2   4   39.02    2.18 
  -6   4   4   35.53    1.83 
  -6   4   4   38.10    2.04 
  -2   6   4   40.97    2.52 
  -2   6   4   40.18    1.99 
   6  -4   4   34.79    1.91 
   5   1  -4   28.15    2.13 
  -5  -1  -4   30.62    1.61 
   5   1  -4   29.66    1.69 
  -1   6  -4   26.36    1.77 
  -5  -1  -4   33.18    1.92 
   1  -6  -4   29.06    1.83 
  -6   5  -4   24.77    1.83 
   6  -5  -4   30.03    2.15 
  -1   6  -4   30.60    2.00 
  -6   5  -4   28.01    1.87 
  -6   5   4   30.46    1.93 
   1  -6   4   28.51    1.91 
  -1   6   4   29.70    1.71 
   5   1   4   29.20    1.96 
  -5  -1   4   34.05    2.06 
   6  -5   4   31.40    1.83 
  -6   5   4   29.43    1.59 
   0   6  -4  103.93    3.94 
  -6   0  -4  112.02    3.19 
  -6   6  -4  102.49    3.77 
   0  -6  -4  108.06    3.73 
  -6   6  -4  107.86    3.84 
   6   0  -4  107.07    3.24 
   6  -6  -4  110.48    4.37 
  -6   0  -4  103.92    3.72 
   6   0  -4  106.62    4.18 
   0   6  -4  104.23    3.75 
   0   6   4  102.55    3.27 
   0  -6   4  103.31    3.67 
  -6   6   4  106.46    3.16 
  -6   6   4  102.91    3.75 
  -6   0   4  104.33    3.82 
   0   6   4  108.33    4.18 
   6  -6   4  104.30    3.59 
   6   0   4  107.93    3.83 
   7  -1  -4   54.21    3.40 
  -6   7  -4   49.25    2.71 
   1   6  -4   51.51    2.91 
  -1  -6  -4   52.72    2.68 
   1   6  -4   55.02    2.73 
   6  -7  -4   50.82    3.16 
  -6   7  -4   51.51    2.81 
  -7   1  -4   51.31    2.75 
  -7   1   4   55.66    2.80 
  -6   7   4   52.70    2.74 
   1   6   4   51.01    2.97 
  -1  -6   4   53.80    2.69 
   1   6   4   49.53    2.15 
   6  -7   4   52.42    2.66 
   7  -1   4   53.72    2.81 
  -7   2  -4  136.64    4.62 
  -5   7  -4  139.79    4.69 
  -5   7  -4  144.23    4.50 
   2   5  -4  137.38    4.87 
  -2  -5  -4  131.91    4.36 
   7  -2  -4  139.45    4.98 
  -5   7  -4  142.71    3.72 
   2   5  -4  138.43    4.53 
   5  -7  -4  139.70    5.27 
   5  -7  -4  140.71    3.93 
   2   5   4  142.67    3.76 
  -7   2   4  139.32    4.51 
  -2  -5   4  136.24    4.37 
   2   5   4  136.34    4.77 
   7  -2   4  141.52    4.57 
  -5   7   4  138.13    4.49 
  -7   2   4  141.70    3.95 
   5  -7   4  142.18    4.49 
  -3  -4  -4   22.40    1.50 
   3   4  -4   21.07    2.10 
  -7   3  -4   26.30    2.27 
   7  -3  -4   26.38    2.54 
   4  -7  -4   24.85    1.63 
  -3  -4  -4   21.99    1.86 
  -4   7  -4   23.69    1.51 
  -4   7  -4   24.98    2.30 
   3   4  -4   22.75    1.96 
  -4   7  -4   23.68    1.73 
  -4   7   4   25.23    2.58 
   7  -3   4   26.45    1.87 
   4  -7   4   26.60    1.90 
  -7   3   4   23.31    1.73 
   3   4   4   25.86    2.27 
  -7   3   4   24.85    1.70 
  -3  -4   4   25.01    1.83 
   3   4   4   25.16    1.41 
  -4   7   4   25.39    1.89 
   4   3  -4   27.38    1.87 
  -3   7  -4   28.24    1.75 
  -3   7  -4   27.01    2.01 
   4   3  -4   29.44    2.19 
  -3   7  -4   27.45    1.69 
  -7   4  -4   28.72    2.10 
   3  -7  -4   27.49    1.78 
   7  -4  -4   26.34    2.45 
  -4  -3  -4   26.48    1.83 
  -3   7  -4   23.41    2.17 
  -4  -3  -4   26.99    1.72 
   4   3   4   31.24    2.14 
  -3   7   4   29.11    1.89 
  -7   4   4   25.69    1.78 
  -3   7   4   26.34    2.57 
  -4  -3   4   28.39    1.96 
  -7   4   4   26.11    1.79 
   4   3   4   27.37    1.61 
   7  -4   4   24.65    1.82 
   5   2  -4  109.00    4.18 
   5   2  -4  104.93    3.51 
  -5  -2  -4  103.92    3.58 
  -2   7  -4  104.31    3.97 
  -5  -2  -4  104.77    3.39 
  -7   5  -4  107.25    3.92 
  -2   7  -4  105.96    3.27 
   2  -7  -4   98.75    3.59 
  -2   7  -4  106.04    3.61 
   7  -5  -4   98.53    4.24 
  -7   5   4  103.52    3.48 
  -2   7   4   99.85    3.55 
   7  -5   4  103.67    3.67 
   5   2   4  100.74    3.90 
   2  -7   4  105.88    3.85 
  -2   7   4  107.39    4.45 
  -5  -2   4   97.23    3.76 
  -7   5   4  102.53    3.73 
  -7   6  -4   14.57    1.77 
  -7   6  -4   11.85    1.58 
  -6  -1  -4   12.57    1.33 
  -1   7  -4   14.91    1.65 
   1  -7  -4   16.86    1.83 
  -1   7  -4   11.78    1.65 
  -6  -1  -4   14.60    1.64 
   6   1  -4   13.42    1.42 
   6   1  -4   15.35    2.08 
   7  -6  -4   19.71    2.31 
  -6  -1   4    9.28    1.44 
  -1   7   4   15.41    1.53 
   7  -6   4   15.15    1.63 
   1  -7   4   12.79    1.59 
  -7   6   4   11.87    1.53 
   6   1   4   12.98    1.65 
  -7   6   4   14.52    1.43 
  -1   7   4   11.00    1.73 
  -7   7  -4   23.81    2.21 
   7   0  -4   22.25    1.80 
   7   0  -4   25.18    2.58 
   0  -7  -4   17.47    1.83 
   0   7  -4   23.82    2.44 
   0   7  -4   21.63    2.08 
  -7   0  -4   23.40    2.30 
   7  -7  -4   20.57    2.47 
  -7   7  -4   23.36    2.23 
  -7   0   4   19.22    2.13 
   0   7   4   23.91    2.56 
   0   7   4   20.44    1.54 
  -7   7   4   22.78    2.25 
   7   0   4   25.62    2.40 
   7  -7   4   22.89    2.10 
   0  -7   4   22.48    2.01 
   1   7  -4   64.49    3.14 
   7  -8  -4   61.54    3.72 
  -7   8  -4   67.36    3.34 
  -8   1  -4   63.66    3.22 
   8  -1  -4   67.65    3.81 
  -1  -7  -4   63.24    3.20 
  -7   8  -4   63.45    3.26 
   1   7  -4   69.80    3.67 
  -8   1   4   69.60    3.34 
  -1  -7   4   61.85    3.04 
   7  -8   4   64.38    3.08 
   1   7   4   69.48    3.75 
   8  -1   4   59.01    3.29 
  -7   8   4   64.04    3.21 
  -6   8  -4   14.28    1.86 
   2   6  -4   16.07    1.87 
   6  -8  -4   15.41    2.15 
  -6   8  -4   13.01    1.73 
  -8   2  -4   12.95    1.74 
   2   6  -4   12.93    1.89 
  -2  -6  -4   18.69    1.99 
   8  -2  -4   14.54    2.19 
   6  -8   4   13.46    1.73 
  -6   8   4   18.21    2.06 
   8  -2   4   11.76    1.84 
   2   6   4   15.20    2.00 
  -2  -6   4   12.45    1.62 
  -8   2   4   17.51    1.99 
   3   5  -4   11.80    1.59 
   8  -3  -4   10.80    1.82 
  -5   8  -4   10.23    1.50 
   5  -8  -4   11.21    1.90 
  -5   8  -4   11.82    1.34 
  -5   8  -4    9.31    1.58 
  -8   3  -4   14.84    1.89 
   5  -8  -4   10.95    1.30 
  -3  -5  -4    9.56    1.41 
   3   5  -4   11.29    1.77 
  -8   3   4   11.89    1.42 
   3   5   4   13.53    1.89 
   5  -8   4   11.43    1.67 
   8  -3   4    8.69    1.44 
  -5   8   4    9.07    1.45 
  -3  -5   4    9.46    1.44 
  -8   3   4   11.93    1.58 
  -4  -4  -4  120.08    4.14 
  -4   8  -4  119.13    3.82 
   8  -4  -4  112.65    4.70 
  -4  -4  -4  130.29    3.96 
  -4   8  -4  118.40    4.09 
  -4   8  -4  125.65    4.61 
  -4   8  -4  122.79    4.61 
  -8   4  -4  120.81    4.49 
   4   4  -4  112.91    4.66 
   4   4  -4  120.62    4.20 
   4  -8  -4  120.22    3.96 
  -4   8   4  120.75    4.22 
   4   4   4  117.57    4.54 
   8  -4   4  123.25    4.29 
  -4   8   4  133.16    5.33 
  -8   4   4  119.86    4.02 
  -4  -4   4  124.36    4.40 
  -8   4   4  123.45    4.32 
   3  -8  -4   39.70    2.29 
   8  -5  -4   38.12    2.75 
  -5  -3  -4   41.27    2.30 
  -3   8  -4   37.66    2.17 
  -3   8  -4   40.16    2.68 
   5   3  -4   40.38    2.35 
  -8   5  -4   45.90    2.68 
   5   3  -4   39.26    2.75 
  -5  -3  -4   39.50    2.26 
  -3   8  -4   40.09    2.53 
  -3   8  -4   38.50    2.19 
  -8   5   4   36.75    2.33 
  -3   8   4   45.07    2.46 
  -5  -3   4   42.27    2.54 
   3  -8   4   39.92    2.45 
  -3   8   4   39.62    3.02 
   5   3   4   41.47    2.57 
   8  -5   4   43.30    2.49 
  -8   5   4   39.24    2.30 
  -2   8  -4   18.58    2.21 
  -2   8  -4   16.83    1.79 
   6   2  -4   17.47    2.16 
  -6  -2  -4   20.80    1.98 
   6   2  -4   15.97    1.71 
   2  -8  -4   23.44    2.16 
  -6  -2  -4   18.69    1.75 
  -2   8  -4   19.81    1.76 
  -8   6  -4   17.93    1.99 
   8  -6  -4   15.90    2.12 
  -8   6  -4   21.16    2.24 
  -6  -2   4   20.65    2.21 
  -2   8   4   15.35    2.14 
  -2   8   4   18.80    1.86 
   8  -6   4   22.47    2.16 
   6   2   4   18.14    1.99 
  -8   6   4   22.56    1.97 
   2  -8   4   19.80    2.02 
  -8   6   4   21.76    2.18 
   7   1  -4   66.34    2.79 
  -8   7  -4   65.01    3.34 
   7   1  -4   69.66    3.77 
   1  -8  -4   67.80    3.27 
  -1   8  -4   67.76    3.20 
  -7  -1  -4   66.38    3.22 
  -7  -1  -4   70.22    2.82 
  -8   7  -4   71.07    3.47 
  -1   8  -4   61.90    3.44 
   8  -7  -4   58.78    3.56 
  -8   7   4   67.33    2.91 
  -8   7   4   70.61    3.41 
   7   1   4   63.46    3.38 
   8  -7   4   69.06    3.24 
  -1   8   4   65.79    3.76 
  -1   8   4   68.83    2.89 
   1  -8   4   62.68    3.02 
  -7  -1   4   67.82    3.36 
  -8   0  -4   19.39    2.22 
   8   0  -4   21.23    2.71 
  -8   8  -4   19.40    2.21 
   0  -8  -4   20.11    2.09 
  -8   8  -4   20.39    2.26 
   0   8  -4   21.49    2.44 
   8  -8  -4   17.39    2.36 
   0   8  -4   17.75    1.99 
   8   0   4   17.18    2.17 
  -8   8   4   18.42    2.16 
   8  -8   4   16.92    1.93 
   0  -8   4   15.71    1.85 
   0   8   4   16.15    2.34 
  -8   0   4   16.98    2.10 
   1   8  -4   18.45    2.25 
  -8   9  -4   17.79    2.25 
  -1  -8  -4   19.50    2.31 
  -9   1  -4   20.65    2.40 
   8  -9  -4   17.23    2.54 
  -8   9  -4   15.28    2.00 
   1   8  -4   22.66    2.70 
   9  -1  -4   21.03    2.75 
   8  -9   4   19.57    2.22 
   1   8   4   15.44    2.25 
   9  -1   4   16.72    2.18 
  -9   1   4   18.64    2.33 
  -1  -8   4   18.77    2.08 
  -8   9   4   21.05    2.42 
   2   7  -4   17.58    2.35 
  -9   2  -4   21.41    2.40 
   9  -2  -4   19.91    2.62 
  -7   9  -4   19.64    2.16 
   2   7  -4   23.28    2.39 
   7  -9  -4   19.13    2.59 
  -7   9  -4   23.31    2.45 
  -2  -7  -4   22.58    2.32 
   2   7   4   20.90    2.55 
  -7   9   4   22.83    2.38 
  -9   2   4   22.27    2.36 
  -2  -7   4   25.66    2.41 
   9  -2   4   17.17    2.18 
   7  -9   4   20.02    2.19 
  -3  -6  -4   71.79    3.43 
  -6   9  -4   64.70    3.58 
   6  -9  -4   64.66    4.02 
  -6   9  -4   65.74    3.30 
   9  -3  -4   65.78    3.83 
  -9   3  -4   63.60    3.43 
   3   6  -4   68.84    3.37 
   3   6  -4   61.67    3.65 
  -3  -6   4   63.24    3.22 
   9  -3   4   61.03    3.37 
  -9   3   4   66.17    3.42 
   6  -9   4   70.11    3.46 
  -6   9   4   63.93    3.32 
   3   6   4   61.30    3.49 
   9  -4  -4   11.18    1.98 
  -5   9  -4   14.08    1.77 
  -5   9  -4   10.31    1.76 
   4   5  -4   12.81    1.97 
   4   5  -4    9.64    1.59 
   5  -9  -4   14.92    2.16 
  -9   4  -4   14.78    2.03 
   5  -9  -4   10.40    1.38 
  -4  -5  -4    8.88    1.48 
  -9   4   4   11.32    1.49 
  -4  -5   4   12.98    1.82 
   4   5   4   16.64    2.15 
   9  -4   4   13.64    1.90 
  -5   9   4   10.17    1.69 
  -9   4   4   10.43    1.62 
   5  -9   4   12.25    1.80 
  -4   9  -4   23.39    2.02 
   5   4  -4   23.32    2.63 
   9  -5  -4   29.40    3.00 
  -4   9  -4   21.83    2.04 
  -4   9  -4   23.79    2.52 
   5   4  -4   23.38    2.29 
  -9   5  -4   28.31    2.74 
   4  -9  -4   23.69    2.15 
  -5  -4  -4   26.96    2.31 
  -4   9  -4   19.76    2.25 
  -5  -4  -4   26.18    2.23 
  -4   9   4   24.50    2.31 
   5   4   4   23.29    2.51 
  -5  -4   4   27.88    2.56 
   9  -5   4   20.39    2.16 
  -9   5   4   23.55    2.22 
  -9   5   4   24.07    2.24 
  -4   9   4   26.54    3.07 
   6   3  -4   71.72    3.90 
   6   3  -4   68.60    3.16 
  -3   9  -4   77.32    3.89 
  -3   9  -4   69.21    3.01 
  -6  -3  -4   66.41    3.15 
   9  -6  -4   62.17    3.74 
  -9   6  -4   66.93    3.49 
   3  -9  -4   69.42    3.21 
  -3   9  -4   74.15    3.25 
  -6  -3  -4   68.48    3.09 
  -3   9   4   70.36    3.21 
   9  -6   4   67.68    3.40 
  -9   6   4   67.73    3.33 
  -6  -3   4   72.64    3.61 
  -3   9   4   69.42    4.14 
  -9   6   4   67.72    3.21 
   3  -9   4   67.68    3.32 
   6   3   4   67.77    3.62 
   9  -7  -4   11.43    2.10 
  -2   9  -4   10.44    1.60 
   7   2  -4    9.63    1.43 
  -7  -2  -4   11.83    1.53 
  -9   7  -4   13.42    1.91 
  -2   9  -4   12.30    1.98 
   7   2  -4   10.90    2.00 
   2  -9  -4   13.31    1.80 
  -9   7  -4   10.73    1.87 
  -7  -2  -4   12.22    1.80 
  -2   9   4   11.81    1.58 
  -2   9   4    9.75    2.06 
  -9   7   4   12.13    1.82 
   9  -7   4   15.63    1.95 
  -7  -2   4    9.51    1.65 
  -9   7   4   12.34    1.64 
   2  -9   4   14.59    1.85 
   7   2   4    8.61    1.67 
   8   1  -4   17.70    2.47 
  -1   9  -4   13.99    1.84 
  -1   9  -4   14.21    2.13 
   1  -9  -4   13.46    1.94 
  -9   8  -4   13.63    1.98 
  -9   8  -4   12.49    1.86 
  -8  -1  -4   16.23    2.02 
   9  -8  -4   13.72    2.33 
   8   1   4   15.34    2.15 
   1  -9   4   10.29    1.65 
  -9   8   4   12.57    1.88 
  -8  -1   4   12.03    1.93 
   9  -8   4   16.49    2.08 
  -1   9   4   18.11    2.56 
   0   9  -4   64.99    3.54 
   9  -9  -4   69.07    4.38 
   0   9  -4   66.45    4.10 
   0  -9  -4   77.11    3.85 
  -9   9  -4   66.41    3.68 
  -9   0  -4   73.79    3.85 
  -9   9  -4   68.27    3.77 
   9   0  -4   67.28    4.18 
  -9   9   4   69.94    3.79 
   9   0   4   65.20    3.81 
  -9   0   4   66.67    3.84 
   0   9   4   69.08    4.22 
   0  -9   4   69.37    3.69 
   9  -9   4   71.94    3.63 
  -9  10  -4    6.74    1.70 
 -10   1  -4    5.85    1.63 
  -1  -9  -4    6.35    1.56 
   9 -10  -4    9.96    2.21 
  10  -1  -4    8.50    2.36 
   1   9  -4    7.34    1.92 
  -9  10  -4   10.22    2.04 
 -10   1   4   10.76    1.94 
   1   9   4    7.47    2.05 
   9 -10   4    9.06    1.75 
  -1  -9   4    8.52    1.80 
  10  -1   4    4.78    1.54 
  -9  10   4    6.38    1.60 
  -8  10  -4   64.90    3.85 
   8 -10  -4   72.77    4.46 
 -10   2  -4   80.21    4.11 
   2   8  -4   77.53    3.87 
   2   8  -4   70.20    4.27 
  10  -2  -4   72.55    4.39 
  -8  10  -4   75.06    3.88 
  -2  -8  -4   71.31    3.70 
  10  -2   4   73.76    4.08 
 -10   2   4   71.44    3.98 
   2   8   4   72.89    4.30 
   8 -10   4   74.86    3.87 
  -8  10   4   77.78    4.04 
  -2  -8   4   82.62    3.76 
   3   7  -4   21.07    2.59 
   3   7  -4   24.44    2.64 
  -7  10  -4   25.51    2.60 
  -7  10  -4   22.32    2.60 
  -3  -7  -4   23.64    2.52 
   7 -10  -4   25.30    3.08 
 -10   3  -4   22.24    2.64 
  10  -3  -4   22.58    2.78 
  10  -3   4   17.86    2.32 
   3   7   4   24.17    2.82 
 -10   3   4   20.96    2.44 
  -7  10   4   22.88    2.50 
   7 -10   4   21.59    2.44 
  -3  -7   4   20.16    2.22 
   6 -10  -4    8.16    1.98 
  -4  -6  -4   10.15    1.66 
  -6  10  -4   12.97    1.86 
   4   6  -4   10.16    1.75 
   4   6  -4   11.68    2.12 
  10  -4  -4    9.41    2.04 
 -10   4  -4   11.02    1.94 
  -6  10  -4   11.29    1.91 
   4   6   4   12.57    2.12 
   6 -10   4    9.50    1.72 
  10  -4   4   11.38    1.90 
  -6  10   4    9.86    1.75 
 -10   4   4   11.35    1.81 
  -4  -6   4    9.95    1.69 
 -10   5  -4   49.82    3.24 
  -5  10  -4   54.76    3.01 
  -5  -5  -4   52.31    3.01 
   5   5  -4   52.30    3.49 
   5 -10  -4   50.10    2.81 
   5 -10  -4   50.86    3.61 
  10  -5  -4   48.33    3.42 
   5   5  -4   51.89    3.07 
  -5  10  -4   53.89    3.28 
 -10   5   4   54.25    2.93 
  -5  10   4   51.76    3.09 
  10  -5   4   53.38    3.17 
   5   5   4   53.43    3.41 
 -10   5   4   54.62    3.18 
   5 -10   4   54.58    3.33 
  -5  -5   4   49.61    3.16 
  10  -6  -4   17.37    2.53 
 -10   6  -4   15.70    2.11 
   4 -10  -4   20.81    2.25 
  -4  10  -4   17.59    2.09 
  -6  -4  -4   20.03    2.19 
   6   4  -4   22.77    2.27 
   6   4  -4   19.88    2.66 
  -4  10  -4   24.31    2.78 
  -6  -4  -4   21.27    2.22 
  -4  10   4   17.57    2.07 
 -10   6   4   15.62    1.96 
  10  -6   4   19.55    2.25 
 -10   6   4   15.69    2.01 
  -6  -4   4   21.99    2.52 
  -4  10   4   19.52    2.71 
   4 -10   4   23.10    2.25 
   6   4   4   16.44    2.36 
 -10   7  -4   14.91    2.17 
  -7  -3  -4   12.41    1.70 
  10  -7  -4   16.88    2.49 
   7   3  -4   13.26    2.19 
  -7  -3  -4   12.74    1.83 
  -3  10  -4   11.73    2.13 
   7   3  -4   13.82    1.86 
   3 -10  -4   12.05    1.77 
 -10   7   4   12.86    1.95 
   3 -10   4   11.80    1.78 
  -3  10   4   15.43    2.57 
  10  -7   4   12.06    1.91 
  -7  -3   4   13.45    1.99 
   7   3   4   13.76    2.07 
  -3  10   4   16.64    1.98 
 -10   7   4   11.47    1.74 
  -8  -2  -4   68.59    3.67 
 -10   8  -4   74.25    3.93 
   2 -10  -4   70.08    3.60 
  10  -8  -4   69.43    4.28 
  -2  10  -4   80.01    4.40 
   8   2  -4   69.28    4.27 
 -10   8   4   70.58    3.84 
  10  -8   4   66.90    3.71 
   2 -10   4   70.52    3.67 
  -8  -2   4   71.04    3.94 
  -2  10   4   72.38    4.54 
   8   2   4   66.73    3.92 
   9   1  -4   16.57    2.63 
  10  -9  -4   16.30    2.63 
 -10   9  -4   20.54    2.54 
   1 -10  -4   15.68    2.19 
 -10   9  -4   17.87    2.52 
  -9  -1  -4   17.34    2.32 
  -1  10  -4   16.02    2.46 
  -9  -1   4   15.28    2.35 
   9   1   4   11.45    2.09 
 -10   9   4   18.18    2.52 
  -1  10   4   15.92    2.59 
  10  -9   4   17.07    2.24 
   1 -10   4   18.58    2.30 
   0  10  -4   12.47    2.36 
   0 -10  -4   14.24    2.26 
 -10  10  -4   13.32    2.30 
  10   0  -4   15.07    2.70 
 -10  10  -4   11.61    2.08 
  10 -10  -4   14.68    2.81 
 -10   0  -4   14.14    2.23 
 -10  10   4   13.10    2.20 
  10 -10   4   13.75    2.18 
   0 -10   4   12.80    2.24 
   0  10   4   12.71    2.46 
  10   0   4   10.57    2.14 
 -10   0   4   11.59    2.11 
  11  -1  -4   40.95    4.34 
 -10  11  -4   38.31    3.57 
   1  10  -4   34.08    3.84 
  10 -11  -4   34.80    3.85 
  -1 -10  -4   41.91    3.66 
 -11   1  -4   42.64    3.86 
   1  10   4   37.10    3.98 
 -11   1   4   42.41    3.89 
  -1 -10   4   30.87    3.17 
 -10  11   4   42.47    3.77 
  11  -1   4   43.83    3.96 
 -11   2  -4   13.91    2.27 
  -9  11  -4   16.39    2.36 
  -2  -9  -4   15.66    2.24 
   9 -11  -4   15.16    2.87 
   2   9  -4   13.90    2.53 
  11  -2  -4   19.21    3.05 
 -11   2   4   18.50    2.62 
  -9  11   4   15.56    2.35 
   2   9   4   16.13    2.71 
  11  -2   4   12.27    2.23 
  -2  -9   4   14.79    2.27 
   3   8  -4   17.16    2.75 
  -3  -8  -4   17.14    2.29 
  11  -3  -4   20.33    3.00 
   8 -11  -4   19.68    3.08 
  -8  11  -4   17.58    2.33 
 -11   3  -4   16.88    2.51 
  -3  -8   4   13.99    2.12 
   8 -11   4   14.94    2.60 
  -3  -8   4   15.17    2.08 
   3   8   4   14.31    2.53 
  -8  11   4   23.37    2.81 
 -11   3   4   17.90    2.47 
  11  -3   4   18.52    2.63 
  11  -4  -4   48.67    4.21 
  -7  11  -4   38.44    2.89 
   4   7  -4   45.75    3.60 
   7 -11  -4   43.93    4.03 
  -4  -7  -4   47.93    3.17 
 -11   4  -4   37.28    3.43 
 -11   4   4   47.57    3.27 
  -4  -7   4   46.38    3.11 
  -7  11   4   43.97    3.18 
  -4  -7   4   53.30    3.27 
   7 -11   4   39.96    3.10 
  11  -4   4   43.40    3.29 
   4   7   4   39.82    3.66 
 -11   5  -4   13.90    2.15 
   5   6  -4    9.86    1.79 
   6 -11  -4   13.02    2.43 
   5   6  -4    7.15    1.87 
  -5  -6  -4   13.09    1.91 
  11  -5  -4   13.64    2.38 
  -6  11  -4   12.89    1.93 
  -6  11   4   14.65    2.12 
  -5  -6   4   10.31    1.91 
   5   6   4    8.88    1.85 
  11  -5   4   12.25    2.06 
 -11   5   4   10.79    1.88 
   6 -11   4   15.63    2.38 
  -5  -6   4   12.26    1.96 
 -11   6  -4   27.91    3.05 
   6   5  -4   20.41    2.74 
  11  -6  -4   23.73    3.08 
   6   5  -4   25.80    2.63 
  -6  -5  -4   25.19    2.61 
   5 -11  -4   20.03    2.90 
  -6  -5   4   24.83    2.78 
 -11   6   4   25.24    2.64 
   5 -11   4   24.69    2.89 
   6   5   4   28.84    3.23 
  -5  11   4   19.77    2.95 
  -6  -5   4   21.43    2.35 
  11  -6   4   22.26    2.61 
 -11   6   4   22.40    2.43 
  -5  11   4   25.05    2.53 
  -7  -4  -4   59.39    3.24 
  11  -7  -4   63.51    4.31 
  -4  11  -4   62.43    4.05 
   7   4  -4   50.00    4.35 
 -11   7  -4   59.04    3.62 
   4 -11  -4   60.03    3.46 
   7   4  -4   66.02    3.45 
  -4  11   4   50.79    4.63 
   4 -11   4   63.75    3.39 
  -7  -4   4   61.57    3.63 
 -11   7   4   51.57    3.30 
  11  -7   4   55.43    3.50 
 -11   7   4   56.40    3.35 
  -4  11   4   58.26    3.41 
  -7  -4   4   59.79    3.32 
   7   4   4   57.63    3.93 
  -3  11  -4   12.74    2.37 
   8   3  -4   10.43    2.26 
  11  -8  -4   14.37    2.69 
 -11   8  -4   13.75    2.26 
   3 -11  -4   10.62    1.82 
  -8  -3  -4   11.66    2.03 
   3 -11   4   13.92    2.14 
  11  -8   4    9.98    1.97 
 -11   8   4   12.81    2.11 
  -8  -3   4    9.91    2.00 
   8   3   4    9.34    1.93 
  -3  11   4   15.69    2.82 
  -2  11  -4   10.97    2.37 
 -11   9  -4   12.47    2.18 
   9   2  -4   12.97    2.56 
   2 -11  -4   18.07    2.38 
  -9  -2  -4   15.81    2.23 
  11  -9  -4   14.78    2.74 
  -9  -2   4   16.11    2.49 
  -2  11   4   11.01    2.39 
   9   2   4   14.55    2.49 
 -11   9   4   12.41    2.13 
   2 -11   4   16.39    2.33 
  11  -9   4   11.68    2.10 
   1 -11  -4   39.56    3.47 
  10   1  -4   36.41    3.92 
  -1  11  -4   46.91    4.33 
 -10  -1  -4   34.72    3.43 
 -11  10  -4   48.01    3.98 
  11 -10  -4   36.09    4.00 
 -11  10   4   40.47    3.75 
   1 -11   4   39.22    3.61 
 -10  -1   4   37.78    3.53 
  -1  11   4   39.32    4.12 
  10   1   4   45.61    4.22 
   0  11  -4   11.65    2.63 
 -11   0  -4   11.30    2.26 
  11   0   4   15.41    2.69 
   2  10  -4    8.57    2.38 
  12  -2   4    7.98    2.06 
  -9  12  -4   44.38    3.38 
  12  -3  -4   38.00    4.26 
  -3  -9  -4   45.99    3.45 
   3   9  -4   44.29    4.32 
   9 -12  -4   35.08    4.20 
 -12   3  -4   50.80    3.70 
  -9  12   4   41.14    3.83 
 -12   3   4   37.62    3.65 
  -3  -9   4   40.67    3.72 
   3   9   4   35.53    3.84 
  12  -3   4   39.89    3.87 
  12  -4  -4    9.33    2.43 
  -4  -8  -4    6.72    1.77 
   8 -12  -4    4.71    2.16 
   4   8  -4    2.40    1.56 
  -8  12  -4    4.38    1.51 
 -12   4  -4    6.24    1.72 
 -12   4   4    6.61    1.82 
  -4  -8   4    4.82    1.46 
   4   8   4    6.72    1.99 
  12  -4   4    5.93    1.92 
  -8  12   4    5.42    1.66 
  12  -5  -4    8.27    2.09 
   5   7  -4    6.15    1.89 
   7 -12  -4    7.46    2.18 
  -7  12  -4    8.31    1.80 
  -5  -7  -4    6.62    1.72 
 -12   5  -4   10.16    2.21 
  -7  12   4   10.84    2.03 
  12  -5   4    9.45    2.14 
  -5  -7   4   10.88    1.97 
   5   7   4    9.96    2.12 
 -12   5   4   11.13    2.08 
  -5  -7   4   10.90    2.09 
  12  -6  -4   57.70    4.32 
   6 -12  -4   60.03    4.31 
  -6  -6  -4   66.55    3.77 
   6   6  -4   54.15    4.18 
 -12   6  -4   60.07    4.03 
   6   6   4   62.32    4.17 
  -6  12   4   64.35    3.82 
 -12   6   4   56.78    3.69 
  -6  -6   4   61.13    3.87 
  -6  -6   4   52.53    3.45 
  12  -6   4   62.44    3.86 
 -12   7  -4   10.84    2.12 
   7   5  -4   13.13    2.55 
  12  -7  -4   10.86    2.49 
  -7  -5  -4   13.23    2.05 
   5 -12  -4   13.14    2.76 
   7   5   4    8.60    2.24 
  12  -7   4   11.73    2.08 
  -7  -5   4   14.99    2.41 
 -12   7   4    9.26    1.90 
  -7  -5   4   11.85    2.02 
 -12   7   4   10.14    2.00 
  -5  12   4    9.20    1.88 
  -5  12   4    9.98    2.52 
 -12   8  -4   12.17    2.24 
  12  -8  -4   10.84    2.47 
  -4  12  -4   12.82    2.59 
   4 -12  -4   16.50    2.44 
   8   4  -4   11.01    2.29 
  -4  12   4   10.56    2.46 
   8   4   4   12.10    2.58 
  -8  -4   4   13.56    2.32 
  12  -8   4   11.43    2.11 
 -12   8   4   10.37    2.01 
 -12   9  -4   37.73    3.67 
  -3  12  -4   37.04    3.86 
   3 -12  -4   34.67    3.28 
  12  -9  -4   41.40    4.29 
   9   3  -4   30.84    3.58 
  -9  -3  -4   38.78    3.47 
  -3  12   4   36.80    4.21 
   3 -12   4   37.08    3.48 
   9   3   4   38.50    3.91 
  -9  -3   4   30.82    3.34 
  12  -9   4   33.54    3.37 
 -12   9   4   31.04    3.21 
 -12  10  -4   19.16    2.79 
 -10  -2  -4   16.01    2.55 
  -2  12  -4   18.30    3.17 
   2 -12   4   16.73    2.47 
  -8  13  -4   32.25    3.24 
  -6  -7  -4   11.45    2.35 
  -6  -7   4   11.46    2.28 
  13  -6   4   14.40    2.60 
 -13   6   4   14.69    2.58 
  -7  13   4   15.94    2.54 
  -7  -6  -4    4.23    1.63 
  -7  -6   4    1.54    1.53 
  13  -7   4    3.18    1.60 
 -13   7   4    5.37    1.82 
  -6  13   4    3.83    1.78 
  -7  -6   4    8.63    1.91 
 -13   8   4   29.14    3.13 
  13  -8   4   29.02    3.24 
   0   0  -5   -0.04    0.20 
   0   0  -5    1.14    0.55 
   0   0  -5    0.32    0.40 
   1   0  -5  240.22    5.26 
   0   1  -5  246.30    4.40 
   0  -1  -5  243.50    4.91 
   0  -1  -5  234.89    5.14 
   1  -1  -5  245.10    5.02 
  -1   1  -5  247.11    5.33 
   0   1  -5  239.58    5.19 
   1  -1  -5  244.20    5.43 
  -1   1  -5  236.31    5.21 
   0   1  -5  236.74    5.36 
   1   0  -5  241.70    4.83 
  -1   0  -5  234.42    5.04 
  -1   0  -5  237.67    5.21 
  -1   0   5  233.47    5.16 
  -1   1   5  240.54    5.23 
   0   1   5  242.76    4.93 
   1   0   5  250.75    4.61 
  -1   1   5  245.03    4.86 
  -1   0   5  241.87    5.13 
   0   1   5  225.04    5.31 
  -2   1  -5    8.88    0.98 
   2  -1  -5    9.03    1.00 
   2  -1  -5    9.53    0.90 
   1   1  -5    8.10    0.73 
  -1  -1  -5    7.87    0.70 
  -1   2  -5    9.11    0.46 
  -1   2  -5    8.43    0.83 
   1   1  -5    7.13    0.80 
  -1   2  -5    8.09    1.07 
   1  -2  -5    9.97    0.97 
  -1  -1  -5    8.95    0.94 
  -2   1  -5   10.17    1.01 
  -1   2   5    7.94    0.56 
   2  -1   5    8.24    0.54 
  -1   2   5    9.17    0.96 
  -2   1   5    9.00    0.85 
  -1  -1   5    8.49    0.93 
  -1  -1   5    8.95    0.88 
  -1   2   5   10.36    1.04 
  -2   1   5    9.14    0.89 
   1   1   5    8.29    0.75 
  -2   0  -5  121.73    3.07 
   2   0  -5  119.08    3.07 
   0   2  -5  113.73    3.08 
   2  -2  -5  118.92    3.24 
  -2   2  -5  120.19    3.03 
   0   2  -5  113.61    2.66 
   0  -2  -5  117.37    3.15 
   2   0  -5  116.27    3.09 
  -2   2  -5  107.59    3.21 
   2  -2  -5  115.42    3.19 
  -2   0  -5  116.95    3.01 
   0   2  -5  121.12    3.45 
   0  -2  -5  116.76    2.53 
  -2   2   5  114.91    3.13 
   0  -2   5  113.31    3.41 
   0   2   5  111.19    3.23 
  -2   0   5  113.75    3.10 
   2  -2   5  118.07    2.43 
  -2   2   5  120.12    2.69 
   2   0   5  118.50    2.81 
   0   2   5  118.99    3.12 
  -2   0   5  117.83    2.90 
   2  -3  -5   84.31    2.86 
  -3   1  -5   83.00    2.65 
   2  -3  -5   78.60    2.46 
  -1  -2  -5   78.41    2.53 
  -2   3  -5   76.51    2.84 
   1   2  -5   82.55    2.43 
  -3   1  -5   84.21    2.44 
   1   2  -5   79.53    2.55 
  -1  -2  -5   79.76    2.06 
   3  -1  -5   79.83    2.46 
  -2   3  -5   82.46    2.40 
   3  -1  -5   84.81    2.74 
  -3   1   5   78.78    2.38 
   1   2   5   79.47    2.53 
   3  -1   5   81.07    2.24 
   2  -3   5   83.10    2.07 
  -3   1   5   81.32    2.49 
   1   2   5   82.19    2.76 
  -2   3   5   77.54    2.60 
  -1  -2   5   81.70    2.75 
  -2   3   5   80.52    1.77 
   3  -2  -5  113.86    3.24 
   3  -2  -5  112.46    3.40 
   1  -3  -5  122.54    3.27 
  -3   2  -5  114.48    3.05 
   2   1  -5  116.35    3.19 
  -1   3  -5  115.50    2.82 
  -3   2  -5  112.60    3.30 
  -2  -1  -5  118.18    2.98 
  -1   3  -5  115.64    3.64 
   2   1  -5  115.98    3.19 
  -1   3  -5  116.74    3.14 
  -2  -1  -5  118.64    3.17 
  -3   2   5  117.29    2.94 
  -1   3   5  120.72    3.32 
   2   1   5  119.58    3.14 
  -2  -1   5  119.39    2.81 
  -1   3   5  116.60    3.46 
  -3   2   5  116.49    3.21 
  -2  -1   5  118.59    3.37 
   3  -2   5  116.62    2.74 
   0   3  -5   10.99    0.97 
  -3   3  -5   14.23    1.38 
  -3   0  -5   11.34    1.07 
  -3   3  -5   12.64    0.90 
   3   0  -5   12.59    1.11 
   0  -3  -5   13.37    1.26 
  -3   0  -5   13.48    1.00 
   3   0  -5   14.15    1.30 
   0   3  -5   12.80    1.22 
   0  -3  -5   10.96    0.55 
   3  -3  -5   11.15    1.08 
   3  -3  -5   13.37    1.42 
   0   3   5   12.78    1.20 
   3  -3   5   11.56    0.81 
  -3   0   5   11.80    1.16 
   0  -3   5   12.89    1.39 
  -3   0   5   12.50    0.89 
  -3   3   5   12.27    1.22 
   3   0   5   10.88    0.98 
  -3   3   5    9.82    0.72 
   0   3   5   13.30    1.29 
   4  -1  -5  116.45    3.16 
  -4   1  -5  112.44    3.47 
   1   3  -5  115.77    3.44 
  -1  -3  -5  118.76    3.44 
  -4   1  -5  114.93    3.00 
   4  -1  -5  120.72    3.73 
   3  -4  -5  123.01    3.28 
  -1  -3  -5  121.24    2.75 
  -3   4  -5  124.32    3.12 
   3  -4  -5  122.70    3.89 
   1   3  -5  116.04    3.38 
  -4   1   5  115.19    3.42 
   1   3   5  122.11    3.44 
  -3   4   5  118.83    3.51 
  -4   1   5  117.24    3.09 
   1   3   5  116.71    3.56 
  -3   4   5  121.01    2.54 
   3  -4   5  117.33    3.06 
   4  -1   5  115.44    3.24 
  -1  -3   5  115.91    3.66 
  -2  -2  -5    2.04    0.61 
  -2   4  -5    1.35    0.48 
   4  -2  -5    1.66    0.55 
  -2   4  -5    0.93    0.63 
   2  -4  -5    1.05    0.53 
   2   2  -5    0.86    0.57 
  -4   2  -5    0.87    0.48 
   4  -2  -5    0.34    0.60 
  -2  -2  -5    0.47    0.41 
   2   2  -5    1.00    0.59 
  -2   4  -5    0.72    0.48 
  -4   2  -5    0.69    0.55 
   4  -2   5    1.02    0.52 
  -4   2   5    2.15    0.62 
  -2  -2   5    1.50    0.42 
  -2  -2   5    0.95    0.59 
  -2   4   5    1.31    0.73 
   2   2   5    1.47    0.66 
   2   2   5    2.09    0.68 
  -4   2   5    0.90    0.51 
  -2   4   5    1.87    0.66 
  -4   3  -5  140.75    4.14 
  -4   3  -5  155.44    3.47 
  -3  -1  -5  141.84    3.78 
   3   1  -5  152.01    3.93 
   4  -3  -5  155.74    3.96 
  -1   4  -5  149.25    4.47 
   3   1  -5  150.68    4.18 
   1  -4  -5  151.15    4.04 
  -3  -1  -5  157.09    3.90 
  -1   4  -5  154.15    3.96 
   4  -3  -5  144.53    4.40 
  -1   4  -5  152.59    3.86 
  -3  -1   5  152.86    3.26 
  -1   4   5  143.70    3.97 
   4  -3   5  155.89    3.71 
  -3  -1   5  145.37    4.09 
  -1   4   5  155.06    4.44 
  -4   3   5  154.34    3.67 
  -4   3   5  145.85    3.98 
   3   1   5  149.87    4.00 
   4   0  -5   68.54    2.36 
   4  -4  -5   70.35    2.37 
   0  -4  -5   69.53    1.56 
   4  -4  -5   66.49    2.84 
  -4   0  -5   63.18    2.24 
   0   4  -5   66.50    2.43 
  -4   0  -5   67.91    2.49 
   0  -4  -5   67.37    2.57 
  -4   4  -5   70.44    2.06 
   4   0  -5   68.14    2.82 
   0   4  -5   65.46    2.51 
  -4   4  -5   68.08    2.67 
   4  -4   5   70.71    2.25 
  -4   0   5   68.13    2.01 
  -4   0   5   68.68    2.63 
   0   4   5   66.63    2.44 
   0   4   5   62.91    2.65 
   0  -4   5   72.61    2.82 
  -4   4   5   69.81    2.01 
   4   0   5   70.43    2.47 
  -4   4   5   69.05    2.63 
  -4   5  -5    1.12    0.46 
  -1  -4  -5    0.48    0.52 
   1   4  -5    0.41    0.58 
  -1  -4  -5    0.87    0.38 
   4  -5  -5    0.38    0.66 
  -5   1  -5    0.34    0.37 
   4  -5  -5    0.26    0.44 
  -4   5  -5   -0.36    0.53 
   5  -1  -5    0.86    0.45 
  -5   1  -5    0.34    0.59 
   1   4  -5    0.76    0.59 
   5  -1  -5   -0.27    0.48 
   5  -1   5    0.05    0.55 
  -4   5   5    0.32    0.64 
   1   4   5   -0.24    0.55 
   4  -5   5   -0.20    0.42 
  -1  -4   5    0.62    0.63 
  -5   1   5    0.25    0.51 
  -5   1   5    0.26    0.43 
  -4   5   5    0.63    0.31 
   1   4   5   -0.16    0.41 
  -2  -3  -5  158.26    4.31 
   2   3  -5  152.60    4.28 
  -3   5  -5  156.57    3.99 
  -3   5  -5  161.28    4.90 
   2   3  -5  155.17    4.51 
   5  -2  -5  160.92    3.84 
   5  -2  -5  152.68    4.71 
  -2  -3  -5  159.81    3.76 
   3  -5  -5  161.37    4.17 
  -5   2  -5  159.42    3.84 
  -5   2  -5  152.96    4.47 
  -5   2   5  150.08    4.20 
  -2  -3   5  160.52    3.24 
  -3   5   5  155.12    4.86 
  -2  -3   5  165.12    4.61 
   2   3   5  160.18    4.27 
  -5   2   5  150.96    4.02 
   5  -2   5  157.28    4.14 
   2   3   5  156.02    4.45 
   3  -5   5  161.66    4.14 
  -3   5   5  159.45    4.44 
  -2   5  -5  148.85    4.62 
  -2   5  -5  144.40    3.90 
  -3  -2  -5  142.76    3.92 
  -3  -2  -5  139.38    3.74 
  -2   5  -5  147.69    4.00 
  -5   3  -5  145.32    3.33 
  -5   3  -5  135.15    4.19 
   3   2  -5  133.18    4.15 
   5  -3  -5  147.26    3.66 
   5  -3  -5  138.35    4.44 
   2  -5  -5  140.81    3.99 
   3   2  -5  139.56    3.96 
  -2   5   5  147.08    4.14 
   3   2   5  140.13    4.08 
  -5   3   5  146.71    4.01 
  -3  -2   5  144.32    2.89 
   5  -3   5  143.08    3.82 
   3   2   5  141.13    4.17 
  -5   3   5  144.89    3.86 
  -2   5   5  145.02    4.63 
   4   1  -5   14.63    1.62 
   5  -4  -5   13.93    1.32 
  -5   4  -5   11.21    0.79 
  -4  -1  -5   12.88    1.26 
  -1   5  -5   11.15    1.25 
  -1   5  -5   13.00    1.38 
  -5   4  -5   10.74    1.29 
   4   1  -5   15.26    1.38 
  -4  -1  -5   12.76    1.25 
   5  -4  -5   12.95    1.63 
   1  -5  -5    9.11    1.16 
  -4  -1   5   12.68    0.74 
  -1   5   5   14.25    1.61 
   1  -5   5   11.68    1.40 
  -1   5   5   11.46    1.22 
  -5   4   5   10.87    1.22 
  -4  -1   5   12.05    1.31 
   5  -4   5   12.17    1.19 
   4   1   5    9.34    1.13 
  -5   4   5   12.19    1.12 
   5   0  -5   83.66    3.34 
   0   5  -5   81.14    3.00 
   0   5  -5   77.69    3.02 
   5   0  -5   81.14    2.72 
  -5   5  -5   78.06    3.12 
   5  -5  -5   78.28    2.63 
  -5   5  -5   79.92    2.26 
  -5   0  -5   78.16    2.93 
   5  -5  -5   78.61    3.43 
  -5   0  -5   82.32    2.61 
   0  -5  -5   73.37    2.88 
  -5   5   5   79.41    3.05 
   0   5   5   78.20    2.75 
   0  -5   5   81.42    3.22 
   5   0   5   73.90    2.85 
   0   5   5   74.10    3.23 
  -5   0   5   81.87    2.30 
  -5   5   5   82.70    2.41 
  -5   0   5   80.25    3.06 
   5  -5   5   77.78    2.71 
  -5   6  -5   77.42    3.29 
  -6   1  -5   83.42    2.53 
  -1  -5  -5   72.06    3.02 
   5  -6  -5   80.52    2.68 
   6  -1  -5   71.59    3.34 
  -5   6  -5   77.52    2.41 
   5  -6  -5   81.92    3.66 
   1   5  -5   78.29    3.21 
   6  -1  -5   77.70    2.61 
   1   5  -5   79.89    3.10 
  -6   1  -5   75.83    3.15 
  -1  -5   5   83.61    3.29 
   6  -1   5   79.08    3.10 
   1   5   5   80.06    2.78 
   1   5   5   82.14    3.46 
   5  -6   5   76.92    2.86 
  -5   6   5   71.95    3.07 
  -6   1   5   82.36    2.57 
  -6   1   5   84.58    3.26 
  -2  -4  -5   75.97    2.38 
  -6   2  -5   82.19    3.17 
   6  -2  -5   78.98    2.44 
   4  -6  -5   78.03    3.52 
  -6   2  -5   78.19    2.33 
  -2  -4  -5   72.31    2.86 
  -4   6  -5   78.88    3.33 
   2   4  -5   72.05    3.14 
   6  -2  -5   71.57    3.25 
   2   4  -5   72.69    2.95 
  -4   6  -5   80.83    2.59 
   2   4   5   77.18    3.19 
   4  -6   5   74.22    2.79 
  -2  -4   5   78.17    3.17 
  -4   6   5   76.70    3.06 
  -6   2   5   80.69    2.71 
   6  -2   5   76.84    2.92 
  -6   2   5   81.92    3.06 
   2   4   5   75.27    2.66 
   6  -3  -5    1.19    0.80 
  -6   3  -5    0.92    0.67 
   3  -6  -5    2.08    0.69 
   3   3  -5    0.54    0.68 
  -3   6  -5    1.56    0.71 
  -3  -3  -5    0.91    0.57 
   3   3  -5    1.14    0.67 
  -3  -3  -5   -0.19    0.52 
  -3   6  -5    0.65    0.68 
   6  -3  -5    1.88    0.53 
  -3   6  -5    0.57    0.53 
  -3   6   5    1.34    0.87 
  -6   3   5    1.32    0.62 
   6  -3   5    1.26    0.63 
   3   3   5    0.36    0.52 
  -3   6   5    2.00    0.75 
  -3  -3   5    1.27    0.76 
  -6   3   5    0.58    0.58 
   3   3   5    1.88    0.79 
   6  -4  -5   50.83    2.80 
  -2   6  -5   51.94    2.30 
   2  -6  -5   49.13    2.31 
   6  -4  -5   52.27    1.96 
   4   2  -5   57.33    2.41 
   4   2  -5   52.34    2.65 
  -2   6  -5   49.94    2.40 
  -4  -2  -5   50.61    2.25 
  -2   6  -5   49.79    2.69 
  -6   4  -5   51.82    2.56 
  -4  -2  -5   53.83    2.26 
  -2   6   5   48.65    2.72 
  -6   4   5   50.57    2.36 
   6  -4   5   50.29    2.27 
   4   2   5   50.11    2.48 
  -6   4   5   54.00    2.25 
  -2   6   5   54.18    2.41 
  -4  -2   5   50.99    2.55 
   5   1  -5   82.62    2.97 
  -6   5  -5   83.69    3.36 
  -5  -1  -5   85.48    2.88 
   6  -5  -5   79.51    2.77 
  -5  -1  -5   84.19    3.15 
   1  -6  -5   80.74    3.12 
  -1   6  -5   83.30    3.13 
  -1   6  -5   87.87    3.32 
   6  -5  -5   82.92    3.66 
   5   1  -5   79.43    3.50 
  -5  -1   5   83.74    3.35 
   6  -5   5   88.33    3.05 
  -6   5   5   85.17    2.76 
   1  -6   5   83.29    3.39 
   5   1   5   81.94    3.22 
  -1   6   5   87.30    3.06 
  -6   5   5   83.97    3.25 
  -1   6   5   88.87    3.70 
   6  -6  -5   -0.48    0.78 
   0   6  -5    0.17    0.66 
  -6   6  -5    0.90    0.78 
   0  -6  -5    0.35    0.69 
   0   6  -5   -0.01    0.64 
   6   0  -5   -0.33    0.90 
  -6   0  -5   -0.26    0.69 
   6   0  -5    0.67    0.59 
  -6   0  -5   -0.57    0.41 
   0   6   5    0.10    0.55 
   0  -6   5   -0.21    0.71 
   6  -6   5    0.04    0.53 
  -6   6   5   -0.03    0.61 
   0   6   5   -1.12    0.73 
  -6   6   5   -0.03    0.44 
  -6   0   5   -0.38    0.66 
   6   0   5    0.46    0.70 
   1   6  -5   92.29    3.86 
   1   6  -5   95.35    3.75 
   7  -1  -5   93.12    4.16 
  -7   1  -5   96.64    3.80 
   6  -7  -5   99.37    4.36 
  -6   7  -5   96.15    3.94 
  -1  -6  -5   96.95    3.68 
  -6   7  -5   95.71    3.80 
  -7   1   5   93.04    3.80 
   7  -1   5   93.19    3.75 
   6  -7   5   99.47    3.53 
   1   6   5   97.22    3.23 
  -1  -6   5   92.36    3.70 
  -6   7   5   92.05    3.77 
   1   6   5   91.20    3.99 
   2   5  -5    2.21    1.07 
  -7   2  -5    1.21    0.94 
  -5   7  -5    2.80    0.72 
  -5   7  -5    3.21    1.05 
   5  -7  -5    2.74    1.26 
   7  -2  -5    2.58    1.06 
   5  -7  -5    2.42    0.78 
  -5   7  -5    1.78    0.85 
   2   5  -5    2.29    0.89 
  -2  -5  -5    1.81    0.81 
  -2  -5   5    1.10    0.81 
  -7   2   5    2.74    0.92 
   2   5   5    2.87    0.72 
  -7   2   5    2.04    0.72 
   5  -7   5    2.05    0.82 
   2   5   5    1.65    0.95 
  -5   7   5    1.66    0.94 
   7  -2   5    2.49    0.95 
   3   4  -5   97.67    3.93 
   4  -7  -5   97.69    4.29 
   4  -7  -5  101.47    3.38 
  -3  -4  -5  104.98    3.69 
  -4   7  -5   92.43    3.48 
  -7   3  -5  100.40    3.85 
   7  -3  -5  100.28    4.18 
  -3  -4  -5   91.82    3.03 
   3   4  -5  103.87    3.66 
  -4   7  -5   97.97    3.21 
  -4   7  -5   98.77    4.01 
  -7   3   5   96.80    3.58 
   7  -3   5   99.93    3.57 
   4  -7   5  104.80    3.66 
  -7   3   5   94.66    3.32 
  -3  -4   5   91.61    3.67 
  -4   7   5   99.99    3.72 
   3   4   5   99.90    3.17 
   3   4   5   94.32    3.80 
  -3   7  -5   66.18    3.05 
   4   3  -5   72.90    2.97 
  -4  -3  -5   66.68    2.82 
  -4  -3  -5   70.32    2.72 
  -7   4  -5   66.55    3.08 
   7  -4  -5   68.30    3.45 
   4   3  -5   67.57    3.27 
   3  -7  -5   69.29    2.83 
  -3   7  -5   76.76    3.48 
  -3   7  -5   65.10    2.69 
  -3   7   5   64.62    2.89 
   4   3   5   69.92    3.18 
   4   3   5   69.41    2.76 
  -7   4   5   69.88    2.89 
  -4  -3   5   64.06    3.06 
  -7   4   5   64.33    2.77 
   7  -4   5   65.58    2.84 
  -3   7   5   63.97    3.52 
  -2   7  -5    0.63    0.76 
  -2   7  -5    1.12    0.78 
   2  -7  -5    0.49    0.70 
  -5  -2  -5    1.22    0.77 
  -5  -2  -5    1.17    0.71 
   5   2  -5   -0.51    0.72 
   5   2  -5    0.66    0.72 
  -7   5  -5    0.74    0.91 
   7  -5  -5    1.11    0.89 
  -2   7   5    0.38    0.68 
   5   2   5    0.75    0.75 
  -5  -2   5    0.39    0.93 
  -2   7   5    0.86    0.89 
   7  -5   5    0.99    0.78 
   2  -7   5    1.06    0.91 
  -7   5   5    0.93    0.80 
  -7   5   5    0.98    0.65 
  -6  -1  -5   64.60    2.62 
   1  -7  -5   64.93    3.00 
  -1   7  -5   63.73    3.12 
  -7   6  -5   60.38    3.11 
   6   1  -5   58.35    3.33 
  -1   7  -5   62.55    2.97 
   6   1  -5   64.62    2.66 
   7  -6  -5   55.63    3.31 
  -6  -1  -5   63.62    2.94 
  -1   7   5   65.62    2.79 
   7  -6   5   64.06    2.83 
  -7   6   5   64.45    2.58 
   1  -7   5   68.96    3.17 
  -6  -1   5   60.26    3.11 
   6   1   5   68.42    3.15 
  -7   6   5   65.64    3.11 
  -1   7   5   62.47    3.32 
   0   7  -5   68.25    3.19 
   7   0  -5   63.89    2.63 
   7   0  -5   70.34    3.78 
   0  -7  -5   64.08    3.14 
  -7   7  -5   65.63    3.20 
   7  -7  -5   61.88    3.55 
  -7   0  -5   66.48    3.11 
   0   7  -5   59.96    3.21 
   0  -7   5   65.43    3.11 
   7  -7   5   66.83    2.94 
  -7   7   5   64.29    3.18 
   7   0   5   63.24    3.16 
   0   7   5   64.12    3.51 
  -7   0   5   60.98    3.18 
   0   7   5   66.04    2.77 
   7  -8  -5    1.14    1.03 
  -7   8  -5    2.30    1.06 
  -7   8  -5    0.91    0.98 
   1   7  -5    1.31    1.01 
  -8   1  -5    0.24    0.85 
   1   7  -5    1.62    0.91 
   8  -1  -5   -0.13    1.20 
  -1  -7  -5    1.75    0.96 
  -7   8   5    0.99    1.00 
  -8   1   5    1.29    1.04 
   7  -8   5    0.51    0.86 
  -1  -7   5    1.16    0.98 
   1   7   5    1.43    1.10 
   8  -1   5    1.21    0.92 
  -2  -6  -5   30.24    2.26 
  -8   2  -5   29.34    2.62 
  -6   8  -5   24.90    2.42 
   8  -2  -5   34.08    3.07 
   2   6  -5   25.76    2.33 
   6  -8  -5   31.15    3.12 
   2   6  -5   32.80    2.49 
  -6   8  -5   29.52    2.24 
   2   6   5   29.08    2.72 
  -6   8   5   29.18    2.57 
  -2  -6   5   28.91    2.22 
  -8   2   5   28.14    2.49 
   8  -2   5   31.39    2.34 
   6  -8   5   27.45    2.03 
  -8   3  -5   50.07    2.92 
   8  -3  -5   49.00    3.18 
   5  -8  -5   51.81    3.32 
  -3  -5  -5   55.54    2.82 
   3   5  -5   52.55    3.10 
  -5   8  -5   50.63    3.00 
  -5   8  -5   52.49    2.33 
  -5   8  -5   57.49    2.86 
   3   5  -5   55.13    2.89 
   5  -8  -5   51.71    2.50 
  -3  -5   5   46.57    2.74 
  -5   8   5   57.02    2.96 
   5  -8   5   53.98    2.78 
  -8   3   5   48.89    2.79 
   3   5   5   54.44    3.01 
  -8   3   5   56.48    2.55 
   8  -3   5   52.62    2.90 
  -4   8  -5    2.29    0.82 
  -4  -4  -5    1.12    0.76 
  -4   8  -5    2.08    1.09 
   4  -8  -5    1.82    0.85 
  -4   8  -5    0.63    0.90 
   4   4  -5    2.57    1.18 
  -4  -4  -5    2.63    0.93 
   8  -4  -5    0.78    0.95 
  -8   4  -5    1.37    0.91 
  -4   8  -5    2.30    0.93 
   4   4  -5    1.98    0.90 
  -8   4   5    1.67    0.90 
  -4  -4   5    1.81    0.98 
  -4   8   5    0.52    0.84 
   4  -8   5    3.45    1.12 
   4   4   5    1.74    1.08 
   8  -4   5    2.76    1.01 
  -8   4   5    1.05    0.76 
  -4   8   5    2.66    1.29 
  -3   8  -5   65.15    3.34 
   5   3  -5   69.36    3.57 
  -5  -3  -5   63.19    2.88 
  -5  -3  -5   62.48    2.85 
   5   3  -5   66.13    3.02 
  -3   8  -5   65.77    2.92 
   8  -5  -5   63.59    3.62 
  -8   5  -5   68.54    3.37 
  -3   8  -5   67.05    3.29 
   3  -8  -5   69.12    3.07 
  -8   5   5   69.84    2.99 
   8  -5   5   71.56    3.19 
  -3   8   5   59.10    3.59 
  -8   5   5   60.46    2.98 
  -3   8   5   67.43    3.12 
   5   3   5   67.79    3.34 
   3  -8   5   59.71    3.15 
  -5  -3   5   66.98    3.35 
   2  -8  -5   54.12    2.89 
  -2   8  -5   55.55    2.86 
  -8   6  -5   57.49    3.13 
   6   2  -5   60.08    3.36 
   6   2  -5   57.91    2.79 
   8  -6  -5   55.88    3.42 
  -2   8  -5   62.05    3.21 
  -6  -2  -5   56.61    2.81 
  -6  -2  -5   55.80    2.68 
  -8   6   5   58.72    2.69 
   6   2   5   52.76    3.01 
  -2   8   5   61.48    3.60 
  -8   6   5   56.15    2.98 
  -2   8   5   56.21    2.80 
  -6  -2   5   57.09    3.11 
   2  -8   5   58.05    3.04 
   8  -6   5   52.81    2.81 
  -7  -1  -5   -0.91    0.59 
   7   1  -5    0.93    1.23 
   7   1  -5   -0.20    0.65 
  -8   7  -5    0.35    0.80 
   1  -8  -5    0.20    0.75 
  -1   8  -5    0.74    0.90 
  -1   8  -5    0.35    0.72 
   8  -7  -5    0.46    0.97 
  -7  -1  -5    0.05    0.84 
   7   1   5   -0.58    0.78 
   8  -7   5   -0.30    0.70 
  -1   8   5   -1.24    0.88 
  -8   7   5    0.20    0.91 
   1  -8   5    0.63    0.86 
  -7  -1   5    0.64    0.97 
  -1   8   5    0.25    0.69 
  -8   0  -5   52.30    3.03 
   0   8  -5   52.54    3.28 
  -8   8  -5   54.81    3.23 
   0  -8  -5   50.53    3.05 
   0   8  -5   52.70    2.95 
   8  -8  -5   51.92    3.55 
   8   0  -5   50.32    3.45 
   8  -8   5   53.54    2.86 
   0  -8   5   50.92    2.95 
   8   0   5   54.72    3.21 
  -8   0   5   56.80    3.29 
  -8   8   5   51.97    3.16 
   8  -9  -5   59.86    4.18 
  -8   9  -5   63.23    3.51 
  -8   9  -5   54.54    3.39 
   1   8  -5   63.18    3.40 
  -1  -8  -5   60.76    3.36 
   1   8  -5   59.74    3.69 
  -9   1  -5   60.21    3.38 
   9  -1  -5   63.00    4.02 
  -1  -8   5   66.35    3.36 
   9  -1   5   56.20    3.41 
   1   8   5   62.99    3.92 
  -8   9   5   64.36    3.57 
   8  -9   5   56.18    3.15 
  -9   1   5   59.08    3.53 
  -7   9  -5   38.66    2.81 
   7  -9  -5   43.77    3.80 
   9  -2  -5   36.75    3.52 
   2   7  -5   40.19    3.00 
   2   7  -5   40.48    2.76 
  -9   2  -5   35.94    2.65 
  -2  -7  -5   36.41    2.64 
  -7   9  -5   31.50    2.72 
   9  -2   5   38.04    2.76 
  -2  -7   5   35.85    2.56 
   2   7   5   40.86    3.07 
  -9   2   5   41.56    2.83 
   7  -9   5   34.22    2.53 
  -7   9   5   41.87    2.77 
   3   6  -5   -1.39    0.89 
  -3  -6  -5    0.77    0.93 
  -6   9  -5   -0.54    0.87 
   6  -9  -5   -0.28    0.98 
   3   6  -5   -0.18    0.80 
  -9   3  -5    1.14    1.05 
   9  -3  -5    0.93    1.19 
  -6   9  -5    0.56    0.90 
  -6   9   5    0.66    0.90 
   3   6   5    1.74    1.19 
   6  -9   5    0.69    0.87 
  -9   3   5   -0.29    0.75 
   9  -3   5    0.84    1.07 
  -3  -6   5    1.33    1.07 
  -9   4  -5   54.42    3.21 
  -5   9  -5   56.15    2.95 
   5  -9  -5   51.24    3.40 
  -4  -5  -5   59.78    3.06 
   5  -9  -5   58.40    2.82 
  -5   9  -5   51.85    2.55 
  -5   9  -5   59.39    3.42 
   4   5  -5   58.25    3.12 
   4   5  -5   49.97    3.29 
   9  -4  -5   54.52    3.52 
  -4  -5   5   54.08    3.08 
  -5   9   5   48.39    2.91 
   5  -9   5   51.23    3.01 
  -9   4   5   52.03    2.97 
   9  -4   5   54.82    2.97 
  -9   4   5   57.20    2.80 
   4   5   5   51.29    3.15 
   5   4  -5   58.26    2.99 
   4  -9  -5   52.76    2.76 
  -5  -4  -5   50.66    2.86 
   9  -5  -5   45.99    3.28 
  -4   9  -5   55.97    2.71 
   5   4  -5   47.24    3.22 
  -9   5  -5   53.95    3.12 
  -4   9  -5   47.16    3.07 
  -4   9  -5   56.25    3.17 
  -4   9  -5   55.22    2.81 
   5   4   5   56.39    3.30 
   9  -5   5   52.43    2.88 
  -9   5   5   52.87    2.90 
  -9   5   5   54.37    2.87 
  -4   9   5   57.00    3.73 
  -4   9   5   47.87    2.81 
  -5  -4   5   48.36    2.96 
   6   3  -5    1.12    0.87 
  -3   9  -5    0.51    1.06 
  -3   9  -5    0.28    0.70 
  -6  -3  -5    0.15    0.77 
  -9   6  -5    0.64    0.86 
   3  -9  -5   -0.62    0.81 
  -6  -3  -5    0.72    0.83 
   9  -6  -5   -0.09    1.14 
   6   3  -5    2.45    1.29 
   3  -9   5    1.73    1.05 
  -3   9   5    0.59    0.87 
   6   3   5    0.29    0.99 
  -9   6   5    1.18    0.96 
  -6  -3   5    1.28    1.13 
  -3   9   5    0.89    1.27 
   9  -6   5    0.59    0.89 
  -9   6   5    0.84    0.85 
   7   2  -5   56.90    3.63 
  -7  -2  -5   67.74    3.32 
   9  -7  -5   64.42    3.95 
  -9   7  -5   61.92    3.49 
  -2   9  -5   62.35    3.21 
   7   2  -5   68.45    3.13 
  -2   9  -5   65.00    3.64 
   2  -9  -5   63.73    3.30 
  -7  -2  -5   68.80    3.05 
   2  -9   5   72.12    3.44 
   9  -7   5   65.27    3.30 
  -7  -2   5   64.95    3.50 
  -2   9   5   68.37    3.25 
  -9   7   5   63.34    3.44 
   7   2   5   62.17    3.42 
  -2   9   5   63.33    3.98 
   8   1  -5   58.40    3.69 
  -1   9  -5   60.73    3.69 
  -9   8  -5   58.23    3.49 
   9  -8  -5   57.92    3.85 
   1  -9  -5   61.45    3.32 
  -8  -1  -5   61.50    3.36 
  -1   9  -5   57.66    3.24 
   9  -8   5   53.64    3.03 
   8   1   5   64.63    3.63 
  -9   8   5   58.41    3.45 
  -1   9   5   60.84    3.93 
   1  -9   5   67.01    3.37 
  -8  -1   5   59.29    3.51 
   0   9  -5   -0.25    1.11 
  -9   0  -5   -0.82    0.96 
   9   0  -5   -1.21    1.28 
   0   9  -5    0.93    0.89 
   0  -9  -5    0.38    1.05 
   9  -9  -5    0.35    1.27 
  -9   9  -5    0.16    1.07 
  -9   0   5   -0.44    0.88 
   0  -9   5    0.66    1.01 
  -9   9   5    0.41    1.12 
   0   9   5   -1.35    1.05 
   9   0   5   -0.80    1.13 
   9 -10  -5   29.52    3.36 
  10  -1  -5   27.74    3.45 
 -10   1  -5   27.58    2.86 
   1   9  -5   24.74    2.75 
  -9  10  -5   28.33    3.14 
  -1  -9  -5   26.10    2.88 
   1   9  -5   29.95    3.24 
  10  -1   5   26.92    2.94 
   1   9   5   25.61    3.15 
 -10   1   5   29.87    3.01 
  -9  10   5   27.79    2.88 
   2   8  -5    1.04    1.33 
  -2  -8  -5    0.06    0.85 
  10  -2  -5   -0.92    1.38 
  -8  10  -5    1.52    1.21 
  -8  10  -5    0.04    1.13 
   8 -10  -5    1.85    1.60 
 -10   2  -5   -0.26    0.91 
   2   8  -5   -1.14    0.86 
  -8  10   5    1.82    1.08 
 -10   2   5   -0.26    0.86 
  10  -2   5    0.13    1.12 
  -2  -8   5    1.41    1.06 
   2   8   5   -1.20    1.10 
  -3  -7  -5   56.83    3.29 
  -7  10  -5   59.25    3.40 
   7 -10  -5   56.56    3.82 
  -7  10  -5   52.58    3.45 
 -10   3  -5   54.90    3.43 
   3   7  -5   55.38    3.34 
  10  -3  -5   53.17    3.68 
   3   7  -5   58.29    3.74 
 -10   3   5   45.29    3.20 
  -7  10   5   55.42    3.38 
  10  -3   5   52.16    3.38 
   3   7   5   60.12    3.81 
  -3  -7   5   54.51    3.24 
  10  -4  -5   55.80    3.74 
  -4  -6  -5   52.78    3.14 
  -6  10  -5   59.46    3.33 
   4   6  -5   64.29    3.43 
  -6  10  -5   59.07    3.55 
   4   6  -5   52.89    3.69 
 -10   4  -5   57.53    3.57 
   6 -10  -5   57.39    4.01 
  10  -4   5   55.47    3.30 
  -6  10   5   61.18    3.41 
   4   6   5   51.19    3.38 
  -4  -6   5   52.73    3.20 
 -10   4   5   53.66    3.30 
   5   5  -5   -0.12    0.85 
  -5  -5  -5   -0.45    0.77 
  -5  10  -5    0.31    1.01 
  10  -5  -5    0.71    1.17 
   5   5  -5    0.09    1.06 
   5 -10  -5    0.27    0.82 
 -10   5  -5   -0.69    0.79 
   5 -10  -5   -0.13    1.16 
  -5  10  -5    0.50    0.93 
   5   5   5    2.14    1.21 
  -5  -5   5    0.69    1.05 
  10  -5   5    0.68    1.01 
  -5  10   5   -0.56    0.88 
 -10   5   5   -0.46    0.84 
 -10   5   5    0.05    0.79 
  -4  10  -5   38.52    3.37 
   6   4  -5   33.48    3.39 
  10  -6  -5   34.69    3.33 
  -4  10  -5   36.61    2.43 
 -10   6  -5   38.46    2.95 
  -6  -4  -5   31.29    2.37 
   4 -10  -5   40.70    2.75 
   6   4  -5   36.24    2.58 
  10  -6   5   36.49    2.65 
 -10   6   5   38.20    2.70 
  -4  10   5   34.85    2.92 
  -6  -4   5   38.22    2.83 
  -4  10   5   39.35    3.98 
 -10   6   5   34.00    2.50 
   6   4   5   38.01    3.31 
  -7  -3  -5   41.65    2.67 
  -3  10  -5   42.60    3.60 
   3 -10  -5   42.21    2.84 
 -10   7  -5   33.59    3.10 
  10  -7  -5   33.25    3.54 
  -7  -3  -5   41.81    2.73 
   7   3  -5   39.04    2.62 
  -3  10  -5   42.56    2.71 
   7   3  -5   38.46    3.57 
  -7  -3   5   41.00    3.10 
 -10   7   5   45.29    3.00 
  10  -7   5   43.02    2.84 
  -3  10   5   40.36    2.67 
  -3  10   5   44.72    4.19 
   7   3   5   40.66    2.99 
 -10   8  -5    0.57    1.07 
   8   2  -5    1.19    1.30 
  10  -8  -5    0.01    1.20 
   2 -10  -5    0.23    1.03 
  -8  -2  -5    0.22    0.98 
  -2  10  -5    0.66    1.25 
  -2  10  -5    0.60    0.84 
  10  -8   5   -0.04    1.01 
  -8  -2   5    0.89    1.20 
  -2  10   5    0.93    1.42 
 -10   8   5    1.89    1.16 
   8   2   5   -0.07    1.09 
  -1  10  -5   46.44    3.90 
 -10   9  -5   38.27    3.48 
  -1  10  -5   44.85    3.07 
   9   1  -5   47.04    4.24 
  10  -9  -5   42.83    3.96 
  -9  -1  -5   40.97    3.48 
   1 -10  -5   42.80    2.98 
 -10   9   5   43.58    3.27 
   9   1   5   47.84    3.47 
  -1  10   5   40.25    3.89 
  -9  -1   5   46.52    3.44 
   1 -10   5   45.24    3.14 
 -10   0  -5   23.13    2.83 
 -10  10  -5   17.33    2.54 
  10 -10  -5   24.19    3.37 
  10   0  -5   22.55    3.19 
   0  10  -5   20.68    2.93 
   0 -10  -5   17.61    2.47 
   0 -10   5   24.10    2.81 
  10   0   5   18.61    2.69 
   0  10   5   17.95    2.80 
 -10   0   5   23.71    2.85 
 -10  10   5   19.30    2.65 
   1  10  -5   -0.02    1.42 
  -1 -10  -5   -0.47    1.07 
  10 -11  -5   -0.56    1.61 
 -10  11  -5   -0.46    1.14 
  11  -1  -5    2.05    1.98 
 -11   1  -5    0.54    1.29 
 -10  11   5    1.30    1.41 
   1  10   5   -0.67    1.28 
  11  -1   5    2.37    1.60 
 -11   1   5   -0.45    1.30 
  -1 -10   5    0.79    1.10 
   2   9  -5   40.48    4.04 
  -2  -9  -5   39.01    3.49 
  11  -2  -5   37.63    3.97 
   9 -11  -5   40.26    4.23 
 -11   2  -5   33.84    3.32 
  -2  -9   5   39.13    3.53 
 -11   2   5   30.96    3.28 
  -9  11   5   37.19    3.42 
  11  -2   5   35.92    3.46 
   2   9   5   35.70    3.80 
  11  -3  -5   36.93    3.96 
   3   8  -5   38.51    3.82 
   3   8  -5   41.64    3.53 
   8 -11  -5   42.47    4.22 
 -11   3  -5   38.04    3.54 
  -8  11  -5   39.77    3.40 
  -3  -8  -5   43.84    3.19 
  -3  -8   5   38.85    2.99 
 -11   3   5   38.06    3.53 
  11  -3   5   41.18    3.64 
   3   8   5   44.54    4.10 
  -8  11   5   47.40    3.43 
   7 -11  -5    0.82    1.25 
  11  -4  -5   -0.01    1.33 
 -11   4  -5    1.17    1.19 
  -4  -7  -5   -0.31    0.94 
   4   7  -5   -0.17    1.10 
   4   7  -5   -0.22    1.12 
  -7  11  -5    1.27    1.14 
  -7  11   5    0.73    1.14 
  -4  -7   5    2.48    1.27 
   4   7   5    0.84    1.27 
  11  -4   5   -1.08    1.18 
 -11   4   5    1.52    1.30 
  -6  11  -5   50.70    3.25 
 -11   5  -5   48.42    3.40 
   5   6  -5   43.18    3.97 
  11  -5  -5   46.86    3.64 
  -5  -6  -5   45.02    3.14 
   6 -11  -5   46.02    4.15 
   5   6  -5   44.98    3.13 
  11  -5   5   48.18    3.28 
 -11   5   5   51.05    3.35 
  -5  -6   5   50.21    3.29 
   5   6   5   43.09    3.28 
  -6  11   5   51.94    3.42 
   6   5  -5   38.65    3.76 
 -11   6  -5   37.39    3.40 
  -6  -5  -5   39.24    2.77 
  11  -6  -5   37.11    3.72 
   5 -11  -5   32.46    3.45 
   6   5  -5   38.47    2.85 
  -5  11   5   40.07    3.31 
  11  -6   5   44.59    3.05 
   6   5   5   34.28    3.33 
  -6  -5   5   38.96    2.96 
 -11   6   5   40.53    2.93 
 -11   6   5   36.17    2.75 
 -11   7  -5    2.15    1.30 
   7   4  -5    1.20    1.16 
  -7  -4  -5    0.02    0.98 
   4 -11  -5   -0.33    1.04 
  11  -7  -5    0.89    1.19 
   7   4  -5    0.15    1.20 
   7   4   5    1.32    1.36 
   4 -11   5    1.41    1.15 
  -7  -4   5    1.33    1.39 
  -4  11   5    1.57    1.17 
  -4  11   5    1.92    1.61 
 -11   7   5    2.19    1.23 
  11  -7   5    0.54    0.98 
 -11   8  -5   32.27    3.26 
   3 -11  -5   25.52    2.75 
   8   3  -5   29.45    3.41 
  -3  11  -5   23.99    3.28 
  11  -8  -5   30.88    3.57 
  -8  -3  -5   29.27    2.88 
  -3  11   5   23.83    3.38 
  -8  -3   5   24.57    2.91 
 -11   8   5   31.38    3.04 
   3 -11   5   28.38    2.82 
   8   3   5   28.60    3.12 
   9   2  -5   29.97    3.55 
  -2  11  -5   35.34    3.70 
 -11   9  -5   28.97    3.24 
  11  -9  -5   29.41    3.57 
   2 -11  -5   36.49    3.35 
  -9  -2  -5   31.14    3.12 
 -11   9   5   41.12    3.62 
  -2  11   5   30.71    3.63 
  -9  -2   5   26.60    3.08 
   2 -11   5   30.22    3.08 
   9   2   5   26.39    3.08 
 -10  -1  -5    2.52    1.45 
  11 -10  -5    0.07    1.72 
  10   1  -5   -0.70    1.19 
   1 -11  -5    1.00    1.21 
  -1  11  -5    0.00    1.41 
 -11  10  -5    1.09    1.40 
 -11  10   5    0.71    1.28 
   1 -11   5   -0.03    1.02 
  10   1   5   -0.13    1.29 
 -10  -1   5   -1.87    1.20 
  -1  11   5    0.83    1.63 
 -11  11  -5   34.23    3.73 
   0  11  -5   27.61    3.60 
  11   0   5   29.06    3.40 
   2  10  -5   33.05    3.87 
  12  -2   5   32.02    3.59 
   3   9  -5    0.12    1.41 
 -12   3   5    2.02    1.47 
  12  -3   5    1.89    1.63 
 -12   4  -5   30.25    3.39 
  12  -4  -5   27.07    3.55 
  -4  -8  -5   18.27    2.58 
   4   8  -5   11.12    2.34 
   8 -12  -5   14.84    2.90 
  12  -4   5   23.13    3.02 
 -12   4   5   20.88    2.80 
   4   8   5   16.02    2.60 
  -8  12   5   22.66    2.86 
  -4  -8   5   12.80    2.15 
  -4  -8   5   16.95    2.45 
 -12   5  -5   27.57    3.20 
  -5  -7  -5   32.67    3.24 
   7 -12  -5   37.04    3.93 
  12  -5  -5   32.33    3.65 
   5   7  -5   33.70    3.68 
  12  -5   5   36.42    3.51 
   5   7   5   23.63    3.20 
 -12   5   5   33.57    3.40 
  -7  12   5   38.22    3.54 
  -5  -7   5   32.40    3.17 
  -5  -7   5   24.60    2.88 
   6   6  -5    0.90    1.37 
   6 -12  -5    0.01    1.44 
  -6  -6  -5   -0.70    1.04 
 -12   6  -5   -0.03    1.17 
  12  -6  -5   -0.05    1.37 
  -6  12   5    0.20    1.18 
  -6  -6   5    0.54    1.12 
  -6  -6   5    0.89    1.39 
   6   6   5    2.29    1.63 
  12  -6   5    1.36    1.47 
 -12   6   5    0.74    1.26 
   7   5  -5   26.45    3.30 
   5 -12  -5   31.36    3.70 
  -7  -5  -5   27.67    2.89 
  12  -7  -5   31.26    3.64 
 -12   7  -5   33.88    3.54 
  -5  12   5   31.21    3.05 
   7   5   5   32.16    3.47 
 -12   7   5   29.55    2.98 
  -7  -5   5   35.43    3.46 
  -7  -5   5   29.65    2.95 
  12  -8  -5   28.21    3.54 
   8   4  -5   27.68    3.54 
 -12   8  -5   28.38    3.17 
   4 -12  -5   30.40    3.10 
   8   4   5   26.74    3.21 
  -4  12   5   23.80    3.42 
 -12   8   5   33.36    3.29 
  -8  -4   5   31.19    3.33 
   9   3  -5   -0.88    1.35 
 -12   9  -5   -0.35    1.14 
   3 -12  -5    0.65    1.30 
   3 -12   5    2.06    1.39 
   9   3   5    1.62    1.48 
 -12   9   5    0.66    1.40 
 -10  -2  -5   29.03    3.30 
 -12  10  -5   25.70    3.23 
   0   0  -6  249.43    5.51 
   0   0  -6  247.97    5.69 
   0   0  -6  255.04    4.76 
   0   1  -6   10.41    0.47 
  -1   1  -6   10.14    1.12 
   1   0  -6    7.81    1.02 
   0  -1  -6    9.51    1.06 
   0  -1  -6   10.91    0.94 
   1   0  -6    8.95    0.70 
   1  -1  -6    9.51    0.81 
   1  -1  -6   10.59    1.16 
  -1   1  -6    9.96    1.15 
   0   1  -6    9.47    1.07 
  -1   0  -6   11.65    1.21 
  -1   0  -6   12.89    1.12 
   0   1  -6    8.41    1.04 
   0   1   6   10.18    0.83 
   0   1   6   10.50    1.20 
   1   0   6    9.09    0.57 
  -1   1   6   10.00    1.11 
  -1   0   6   11.79    1.17 
  -1   1   6   11.08    0.98 
  -1   0   6    9.72    1.01 
  -1   2  -6  147.58    3.75 
   1   1  -6  146.41    3.83 
  -1  -1  -6  145.37    3.41 
  -2   1  -6  152.01    3.91 
   1   1  -6  139.33    3.28 
  -1   2  -6  146.53    4.13 
   2  -1  -6  137.02    3.87 
  -1  -1  -6  140.91    3.70 
   2  -1  -6  143.23    3.63 
   1  -2  -6  145.39    3.83 
  -2   1  -6  149.13    3.83 
   1   1   6  146.84    3.41 
  -2   1   6  148.32    3.58 
  -1   2   6  146.16    3.91 
   1   1   6  142.78    4.06 
  -1   2   6  148.05    3.20 
  -2   1   6  145.43    3.76 
   2  -1   6  146.48    2.98 
  -1   2   6  153.54    3.78 
  -1  -1   6  144.27    3.69 
  -1  -1   6  148.84    3.96 
   0   2  -6  108.75    2.48 
  -2   2  -6  103.45    3.03 
   0  -2  -6  106.63    3.12 
   0   2  -6  106.57    3.12 
   2   0  -6  113.28    3.22 
   2  -2  -6  110.73    3.13 
  -2   0  -6  104.71    3.04 
   2   0  -6  103.95    2.91 
  -2   2  -6  106.52    3.30 
   2  -2  -6  102.72    3.25 
  -2   0  -6  110.01    3.00 
   0  -2  -6  110.75    2.60 
   2  -2   6  105.96    2.14 
   0   2   6  104.66    3.30 
  -2   0   6  106.50    2.98 
  -2   2   6  106.61    3.15 
  -2   2   6  110.10    2.67 
  -2   0   6  106.95    3.13 
   2   0   6  110.05    2.66 
   0   2   6  109.18    3.01 
   0  -2   6  108.01    3.43 
  -3   1  -6   30.11    1.59 
   2  -3  -6   30.64    1.61 
  -1  -2  -6   29.47    1.21 
  -2   3  -6   31.94    1.52 
  -1  -2  -6   32.55    1.64 
   2  -3  -6   32.14    1.74 
   3  -1  -6   29.15    1.62 
   1   2  -6   31.08    1.62 
  -3   1  -6   31.34    1.62 
  -2   3  -6   31.89    1.93 
   1   2  -6   27.88    1.35 
   3  -1  -6   28.38    1.58 
   3  -1   6   30.75    1.26 
   2  -3   6   31.42    1.03 
   1   2   6   36.57    2.08 
  -2   3   6   32.01    1.02 
  -3   1   6   31.76    1.51 
  -2   3   6   28.08    1.59 
   1   2   6   29.71    1.49 
  -3   1   6   30.30    1.54 
  -1  -2   6   30.30    1.80 
  -1   3  -6   64.66    2.34 
   3  -2  -6   65.04    2.45 
  -1   3  -6   67.74    1.84 
   2   1  -6   71.38    2.54 
  -3   2  -6   65.97    2.33 
   2   1  -6   66.53    2.39 
  -3   2  -6   70.52    2.56 
  -2  -1  -6   62.88    2.30 
   3  -2  -6   67.01    2.50 
   1  -3  -6   66.43    2.43 
  -2  -1  -6   68.57    2.19 
  -1   3   6   64.87    2.46 
  -3   2   6   67.33    2.12 
  -1   3   6   68.87    1.53 
  -1   3   6   67.88    2.52 
   2   1   6   63.86    2.20 
  -3   2   6   70.77    2.42 
   3  -2   6   65.95    1.83 
  -2  -1   6   66.32    2.11 
  -2  -1   6   65.92    2.52 
   3   0  -6  126.14    3.67 
  -3   3  -6  131.98    3.41 
   0   3  -6  132.97    3.27 
  -3   3  -6  131.13    3.90 
   0   3  -6  129.03    3.66 
   0  -3  -6  134.79    2.76 
   3   0  -6  130.95    3.59 
   3  -3  -6  125.19    3.85 
   3  -3  -6  131.28    3.74 
   0  -3  -6  130.24    3.72 
  -3   0  -6  133.77    3.64 
  -3   0  -6  125.82    3.43 
   0  -3   6  132.06    4.13 
   3   0   6  133.89    3.38 
  -3   0   6  125.74    3.68 
   3  -3   6  133.00    3.00 
  -3   3   6  132.64    3.06 
  -3   0   6  135.02    3.32 
   0   3   6  134.01    3.81 
  -3   3   6  128.25    3.73 
   0   3   6  139.14    3.82 
   4  -1  -6   14.04    1.43 
   3  -4  -6   14.37    1.30 
   1   3  -6   16.44    1.47 
   4  -1  -6   16.91    1.23 
  -3   4  -6   18.06    1.18 
  -1  -3  -6   16.95    0.89 
  -1  -3  -6   16.02    1.40 
  -4   1  -6   18.58    1.19 
  -3   4  -6   16.47    1.67 
  -4   1  -6   16.03    1.46 
   3  -4  -6   17.62    1.65 
   1   3  -6   14.77    1.30 
  -3   4   6   14.50    1.41 
  -4   1   6   16.76    1.16 
  -3   4   6   16.41    0.76 
  -4   1   6   17.38    1.32 
  -1  -3   6   20.02    1.84 
   3  -4   6   17.36    1.00 
   1   3   6   17.67    1.52 
   1   3   6   18.09    1.58 
   4  -1   6   18.30    1.19 
   2   2  -6  164.68    4.37 
   2   2  -6  165.19    4.41 
  -4   2  -6  169.11    4.18 
   2  -4  -6  169.64    4.41 
  -2   4  -6  170.69    4.97 
  -4   2  -6  165.16    4.56 
  -2  -2  -6  170.55    4.42 
  -2   4  -6  171.65    3.92 
   4  -2  -6  165.58    4.27 
  -2  -2  -6  170.33    3.98 
  -2   4  -6  172.00    4.25 
   4  -2  -6  173.39    4.77 
  -4   2   6  166.67    4.22 
   4  -2   6  168.04    3.97 
  -4   2   6  163.83    4.26 
   2   2   6  164.42    4.36 
  -2  -2   6  178.12    3.83 
  -2   4   6  159.39    4.46 
  -2  -2   6  171.91    4.70 
   2   2   6  165.69    4.70 
  -2   4   6  171.44    4.84 
   4  -3  -6   36.16    1.88 
   4  -3  -6   40.98    2.14 
   3   1  -6   42.49    1.93 
  -3  -1  -6   42.01    1.91 
  -1   4  -6   41.15    1.93 
  -1   4  -6   43.12    1.71 
  -4   3  -6   40.87    2.10 
  -4   3  -6   41.04    1.74 
   1  -4  -6   39.07    1.98 
   3   1  -6   45.09    2.19 
  -3  -1  -6   40.42    1.81 
  -1   4  -6   41.95    2.26 
  -1   4   6   36.78    2.09 
  -4   3   6   40.29    1.65 
  -1   4   6   39.24    1.95 
   4  -3   6   39.84    1.56 
  -4   3   6   44.37    1.99 
   3   1   6   38.19    1.81 
  -3  -1   6   42.99    1.52 
  -3  -1   6   40.55    2.05 
   4   0  -6   25.40    1.50 
   0  -4  -6   24.70    1.63 
   4   0  -6   23.82    1.69 
   0   4  -6   25.22    1.47 
  -4   4  -6   23.82    1.70 
   4  -4  -6   25.12    1.79 
  -4   4  -6   26.34    1.33 
   0   4  -6   26.74    1.63 
  -4   0  -6   25.97    1.62 
   4  -4  -6   27.43    1.67 
  -4   0  -6   26.73    1.47 
  -4   4   6   24.07    1.65 
   0   4   6   25.53    1.73 
  -4   0   6   27.83    1.30 
  -4   0   6   31.61    1.78 
   0   4   6   26.60    1.61 
   0  -4   6   24.37    1.78 
   4   0   6   28.48    1.52 
   4  -4   6   28.54    1.33 
  -4   4   6   27.21    1.22 
   1   4  -6   68.99    2.82 
  -4   5  -6   64.72    2.92 
   4  -5  -6   70.59    3.15 
  -4   5  -6   70.74    2.34 
   5  -1  -6   67.41    2.97 
   5  -1  -6   72.70    2.52 
   1   4  -6   68.87    2.74 
  -5   1  -6   72.49    2.38 
  -5   1  -6   74.30    2.89 
  -1  -4  -6   69.40    2.77 
   4  -5  -6   72.94    2.63 
  -5   1   6   72.60    2.38 
  -1  -4   6   72.84    3.06 
   4  -5   6   67.28    2.36 
  -5   1   6   67.32    2.76 
  -4   5   6   69.87    2.86 
   1   4   6   70.79    2.94 
   1   4   6   74.57    2.77 
  -4   5   6   72.12    1.91 
   5  -1   6   70.76    2.59 
   5  -2  -6   14.66    1.28 
   3  -5  -6    9.90    1.44 
   2   3  -6   12.18    1.36 
  -3   5  -6   13.03    1.26 
  -2  -3  -6   13.40    1.39 
   3  -5  -6   13.77    1.34 
   5  -2  -6   11.34    1.50 
  -2  -3  -6   13.79    1.00 
  -5   2  -6   15.23    1.57 
  -5   2  -6   12.80    1.22 
   2   3  -6   12.24    1.36 
  -3   5  -6   17.06    1.86 
   3  -5   6   14.58    1.10 
   2   3   6   12.91    1.38 
  -5   2   6   14.04    1.30 
   2   3   6   15.76    1.54 
   5  -2   6   13.77    1.22 
  -2  -3   6   13.63    0.92 
  -5   2   6   12.23    1.32 
  -2  -3   6   13.05    1.52 
  -3   5   6   13.72    1.41 
  -2   5  -6   13.24    1.24 
  -2   5  -6   11.34    1.62 
  -2   5  -6   11.42    1.23 
  -5   3  -6   16.19    1.06 
  -3  -2  -6   13.39    1.35 
   3   2  -6   13.50    1.40 
  -5   3  -6   12.50    1.47 
   5  -3  -6   12.81    1.56 
   2  -5  -6   13.22    1.37 
   5  -3  -6   13.14    1.25 
  -3  -2  -6   14.89    1.28 
   3   2  -6   12.88    1.42 
  -3  -2   6   13.06    1.48 
   3   2   6   12.43    1.32 
   5  -3   6   15.26    1.12 
  -5   3   6   13.76    1.27 
  -3  -2   6   13.18    0.81 
  -5   3   6   14.30    1.39 
   3   2   6   13.52    1.47 
  -2   5   6   13.47    1.39 
  -2   5   6   11.63    1.52 
  -4  -1  -6  145.06    4.10 
  -4  -1  -6  151.82    4.10 
   5  -4  -6  152.32    4.83 
   4   1  -6  143.30    4.11 
  -1   5  -6  150.84    4.27 
  -1   5  -6  155.04    4.15 
  -5   4  -6  146.83    3.52 
  -5   4  -6  148.33    4.54 
   4   1  -6  141.94    4.49 
   5  -4  -6  151.60    4.13 
   1  -5  -6  146.12    4.32 
   5  -4   6  150.15    3.90 
  -5   4   6  143.86    4.28 
  -4  -1   6  145.65    3.35 
  -1   5   6  147.07    4.27 
  -5   4   6  149.60    3.79 
   4   1   6  145.15    4.22 
  -1   5   6  147.22    4.70 
  -4  -1   6  146.94    4.48 
   1  -5   6  147.76    4.70 
   5  -5  -6   23.92    2.23 
  -5   0  -6   20.19    1.79 
   5  -5  -6   20.29    1.53 
  -5   0  -6   22.72    1.44 
   0  -5  -6   23.80    1.71 
   5   0  -6   18.78    1.90 
  -5   5  -6   21.50    1.22 
   0   5  -6   18.62    1.69 
   5   0  -6   20.17    1.44 
   0   5  -6   22.53    1.58 
  -5   5  -6   23.17    2.05 
  -5   0   6   17.43    1.70 
  -5   5   6   20.30    1.16 
   5   0   6   18.27    1.67 
   0   5   6   24.13    2.15 
   5  -5   6   21.73    1.35 
  -5   5   6   20.61    1.86 
   0   5   6   21.27    1.52 
   0  -5   6   23.79    2.12 
  -5   0   6   22.38    1.19 
   1   5  -6   47.08    2.45 
   5  -6  -6   44.36    2.76 
   5  -6  -6   44.13    2.11 
  -5   6  -6   44.61    1.87 
  -6   1  -6   46.59    2.50 
  -1  -5  -6   42.61    2.35 
  -5   6  -6   40.15    2.51 
   6  -1  -6   46.00    2.06 
  -6   1  -6   46.38    1.93 
   6  -1  -6   45.83    2.74 
   1   5  -6   49.28    2.52 
  -6   1   6   49.92    1.97 
   1   5   6   46.01    2.59 
  -6   1   6   48.77    2.48 
   1   5   6   48.36    2.25 
  -5   6   6   48.28    2.51 
   5  -6   6   44.29    2.03 
  -1  -5   6   42.24    2.43 
   6  -1   6   45.10    2.29 
   6  -2  -6   40.19    1.83 
  -2  -4  -6   40.61    2.18 
   2   4  -6   37.64    2.27 
   2   4  -6   43.21    2.28 
   6  -2  -6   38.96    2.53 
  -6   2  -6   39.01    1.78 
  -4   6  -6   44.22    2.62 
  -4   6  -6   37.50    1.84 
   4  -6  -6   41.55    2.08 
  -6   2  -6   34.14    2.18 
   4  -6  -6   39.35    2.56 
   2   4   6   39.33    2.32 
  -6   2   6   40.18    1.95 
  -4   6   6   44.79    2.36 
   2   4   6   38.59    2.02 
  -6   2   6   39.43    2.14 
  -2  -4   6   37.56    2.26 
   6  -2   6   39.97    2.06 
   4  -6   6   38.63    1.91 
  -3   6  -6   76.33    2.76 
  -3  -3  -6   70.29    2.87 
  -3  -3  -6   77.71    2.59 
   3   3  -6   73.70    3.13 
   3  -6  -6   78.19    2.93 
  -3   6  -6   73.29    3.30 
   6  -3  -6   70.75    3.28 
  -3   6  -6   73.36    2.76 
   6  -3  -6   81.13    2.59 
  -6   3  -6   70.12    3.05 
   3   3  -6   74.05    2.98 
  -6   3   6   73.31    2.81 
  -3   6   6   65.99    2.92 
   3   3   6   73.64    3.07 
  -3   6   6   78.70    3.61 
  -3  -3   6   76.58    3.17 
   6  -3   6   74.07    2.71 
  -6   3   6   78.78    2.88 
   3   3   6   68.80    2.84 
   2  -6  -6   33.76    1.96 
  -6   4  -6   33.26    2.15 
   4   2  -6   32.03    2.12 
  -4  -2  -6   28.85    1.81 
  -4  -2  -6   34.58    1.83 
   6  -4  -6   28.92    2.15 
   6  -4  -6   30.24    1.65 
  -2   6  -6   34.47    2.39 
   4   2  -6   29.67    1.88 
  -2   6  -6   31.23    1.85 
  -2   6  -6   33.37    1.91 
  -2   6   6   32.76    2.33 
  -6   4   6   30.60    1.70 
  -4  -2   6   29.13    2.00 
   4   2   6   29.59    1.93 
  -2   6   6   30.89    1.94 
   6  -4   6   34.17    1.82 
  -6   4   6   30.20    1.94 
   5   1  -6   24.18    2.19 
  -1   6  -6   23.27    1.69 
   5   1  -6   27.84    1.72 
   1  -6  -6   25.74    2.14 
  -5  -1  -6   24.83    1.76 
   6  -5  -6   26.28    2.43 
  -5  -1  -6   26.91    1.68 
  -6   5  -6   27.23    1.96 
   6  -5  -6   29.40    1.76 
  -1   6  -6   28.01    1.89 
   5   1   6   27.15    1.87 
  -5  -1   6   26.05    1.92 
  -6   5   6   25.00    1.52 
  -6   5   6   25.48    1.95 
   6  -5   6   28.08    1.70 
  -1   6   6   25.92    2.33 
   1  -6   6   28.19    2.10 
  -1   6   6   26.75    1.80 
   0   6  -6  127.56    4.36 
   6   0  -6  125.32    3.82 
  -6   6  -6  133.07    4.65 
   6   0  -6  126.89    4.81 
   6  -6  -6  124.20    4.93 
   0   6  -6  123.75    4.23 
  -6   0  -6  132.20    3.78 
  -6   0  -6  135.83    4.33 
   6  -6  -6  133.58    4.02 
   0  -6  -6  127.46    4.31 
   6   0   6  129.85    4.34 
   6  -6   6  128.43    3.93 
   0   6   6  135.99    4.10 
  -6   6   6  133.94    4.52 
   0   6   6  122.66    4.65 
  -6   0   6  121.05    4.40 
   0  -6   6  130.57    4.65 
  -1  -6  -6   25.80    2.33 
   7  -1  -6   27.35    2.60 
   1   6  -6   27.13    2.13 
  -7   1  -6   27.10    2.39 
  -6   7  -6   28.09    2.53 
   7  -1  -6   22.94    1.63 
   1   6  -6   25.25    2.24 
   6  -7  -6   27.49    2.78 
   6  -7   6   21.22    1.87 
  -1  -6   6   24.92    2.32 
   1   6   6   24.85    1.76 
  -7   1   6   22.47    2.24 
   1   6   6   23.72    2.38 
  -6   7   6   20.72    2.07 
   7  -1   6   27.22    2.06 
   5  -7  -6   78.58    3.86 
   5  -7  -6   75.87    2.95 
   7  -2  -6   82.04    3.86 
   2   5  -6   79.65    3.58 
   2   5  -6   83.31    3.44 
  -5   7  -6   82.39    2.78 
  -2  -5  -6   78.56    3.35 
  -5   7  -6   78.71    3.70 
  -7   2  -6   76.00    3.46 
   5  -7   6   73.93    2.98 
   2   5   6   79.53    3.62 
  -5   7   6   79.41    3.45 
  -7   2   6   85.08    3.45 
  -7   2   6   83.55    2.90 
   7  -2   6   78.23    3.29 
   2   5   6   78.73    2.98 
  -2  -5   6   81.75    3.54 
   7  -3  -6   14.35    1.94 
  -7   3  -6   13.63    1.78 
  -4   7  -6   18.73    1.61 
   3   4  -6   12.80    1.56 
   4  -7  -6   17.03    2.21 
  -3  -4  -6   17.64    1.85 
  -4   7  -6   17.53    2.13 
   3   4  -6   15.40    1.85 
   4  -7  -6   18.64    1.73 
   4  -7   6   17.13    1.63 
   7  -3   6   16.12    1.67 
  -7   3   6   17.90    1.83 
  -4   7   6   18.39    1.88 
   3   4   6   14.17    1.46 
  -3  -4   6   12.25    1.62 
   3   4   6   16.49    1.90 
  -7   3   6   14.98    1.55 
  -3   7  -6   28.85    1.84 
  -3   7  -6   32.16    2.06 
  -3   7  -6   35.70    2.55 
   7  -4  -6   30.69    2.78 
  -7   4  -6   24.51    2.26 
   4   3  -6   25.00    2.27 
   3  -7  -6   30.74    1.99 
  -4  -3  -6   34.57    2.11 
  -4  -3  -6   31.33    1.87 
   4   3  -6   29.29    2.02 
  -4  -3   6   31.09    2.19 
  -3   7   6   29.71    2.08 
   4   3   6   28.51    2.00 
  -7   4   6   30.42    1.93 
   7  -4   6   33.64    2.00 
  -3   7   6   25.79    2.52 
   4   3   6   31.17    2.17 
  -7   4   6   29.37    1.96 
  -5  -2  -6   59.80    2.66 
   7  -5  -6   54.74    3.23 
  -5  -2  -6   52.62    2.53 
  -7   5  -6   60.16    3.04 
  -2   7  -6   61.02    2.73 
   5   2  -6   56.54    2.64 
   2  -7  -6   53.45    2.67 
  -2   7  -6   56.76    2.81 
   5   2  -6   50.83    3.02 
  -2   7   6   53.87    3.16 
   2  -7   6   58.24    3.12 
  -5  -2   6   53.51    2.91 
  -7   5   6   59.24    2.84 
  -7   5   6   54.78    2.46 
   7  -5   6   56.70    2.60 
  -2   7   6   55.62    2.73 
   5   2   6   55.90    2.87 
   7  -6  -6   10.90    1.86 
  -1   7  -6   13.31    1.67 
  -7   6  -6    5.45    1.22 
   6   1  -6   10.37    1.44 
  -6  -1  -6    8.27    1.20 
   6   1  -6    8.03    1.62 
  -1   7  -6    7.03    1.37 
  -6  -1  -6   10.74    1.51 
   1  -7  -6    7.15    1.37 
  -1   7   6    6.66    1.44 
   1  -7   6    8.91    1.59 
  -1   7   6    8.63    1.29 
   7  -6   6    7.54    1.25 
  -6  -1   6   10.99    1.69 
  -7   6   6    6.88    1.31 
   6   1   6   10.80    1.56 
   0   7  -6   13.44    1.80 
   7   0  -6   14.37    1.55 
  -7   0  -6   14.70    1.82 
   0   7  -6   14.13    1.80 
   7  -7  -6   12.81    1.96 
   7   0  -6   11.25    1.91 
  -7   7  -6   14.16    1.85 
   0  -7  -6   11.94    1.71 
   7   0   6   14.48    1.83 
   0   7   6   11.40    1.93 
   0   7   6   13.04    1.54 
  -7   0   6   14.60    1.94 
   7  -7   6   11.74    1.52 
  -7   7   6   14.25    1.88 
   0  -7   6   12.64    1.78 
   1   7  -6   62.67    3.34 
  -1  -7  -6   74.73    3.61 
   8  -1  -6   63.48    3.81 
  -7   8  -6   65.87    3.56 
   1   7  -6   72.08    3.61 
  -8   1  -6   67.72    3.39 
   7  -8  -6   74.89    4.15 
  -8   1   6   76.17    3.70 
   8  -1   6   71.61    3.53 
  -1  -7   6   71.66    3.52 
   1   7   6   66.50    3.73 
  -7   8   6   71.70    3.62 
  -8   2  -6   12.07    1.84 
  -6   8  -6   17.16    2.16 
  -2  -6  -6   13.01    1.73 
   2   6  -6    9.68    1.60 
   2   6  -6   14.20    1.90 
   8  -2  -6   13.74    2.09 
   6  -8  -6   13.07    2.11 
   8  -2   6   13.34    1.85 
  -6   8   6   14.37    1.81 
   2   6   6   13.96    1.95 
  -2  -6   6   16.14    1.94 
  -8   2   6    9.62    1.59 
   3   5  -6    9.66    1.64 
   5  -8  -6   10.21    1.80 
  -8   3  -6   10.07    1.60 
   3   5  -6    8.48    1.60 
   8  -3  -6    9.82    1.88 
   5  -8  -6   10.44    1.39 
  -5   8  -6    8.36    1.56 
  -3  -5  -6   12.25    1.68 
  -5   8  -6   10.25    1.32 
  -5   8   6   11.09    1.62 
   3   5   6    8.46    1.50 
  -8   3   6   11.40    1.43 
  -3  -5   6    8.65    1.49 
   8  -3   6    9.40    1.48 
  -8   3   6   12.27    1.71 
   4   4  -6  116.35    4.19 
   4   4  -6  106.44    4.51 
  -8   4  -6  112.37    4.45 
   8  -4  -6  114.65    4.82 
   4  -8  -6  114.01    3.97 
  -4   8  -6  116.17    4.72 
  -4   8  -6  120.31    3.92 
  -4  -4  -6  108.39    4.09 
  -4  -4   6  109.23    4.32 
  -4   8   6  117.11    4.98 
   4   4   6  115.03    4.48 
  -8   4   6  110.55    4.07 
   8  -4   6  117.87    4.12 
   4  -8   6  111.08    4.14 
  -8   4   6  111.07    3.95 
  -4   8   6  116.07    4.32 
  -3   8  -6   37.76    2.25 
   5   3  -6   26.04    2.57 
  -5  -3  -6   33.43    2.17 
   8  -5  -6   34.51    3.09 
  -5  -3  -6   31.20    2.12 
   5   3  -6   30.95    2.17 
  -3   8  -6   29.65    2.70 
  -3   8  -6   34.78    2.42 
  -8   5  -6   31.07    2.82 
   3  -8  -6   34.28    2.28 
   8  -5   6   32.67    2.15 
   3  -8   6   30.40    2.34 
  -8   5   6   30.76    2.25 
  -8   5   6   30.71    2.09 
  -3   8   6   40.98    3.08 
  -5  -3   6   31.76    2.35 
  -3   8   6   32.55    2.24 
   5   3   6   32.57    2.44 
  -8   6  -6   17.35    2.07 
   2  -8  -6   14.52    1.81 
   6   2  -6   15.03    2.03 
  -2   8  -6   18.47    2.05 
  -2   8  -6   17.02    1.94 
   8  -6  -6   18.43    2.35 
   6   2  -6   16.47    1.80 
  -6  -2  -6   19.80    1.98 
  -6  -2  -6   16.58    1.71 
  -8   6   6   16.69    1.70 
  -6  -2   6   14.95    1.99 
  -8   6   6   13.25    1.81 
   8  -6   6   15.93    1.75 
  -2   8   6   13.60    2.01 
   2  -8   6   12.59    1.79 
   6   2   6   14.85    1.92 
  -2   8   6   15.75    1.79 
   7   1  -6   45.79    3.26 
   8  -7  -6   45.00    3.29 
  -1   8  -6   46.49    2.75 
   7   1  -6   44.36    2.44 
  -7  -1  -6   43.57    2.69 
  -8   7  -6   45.82    2.98 
   1  -8  -6   45.17    2.72 
  -1   8  -6   48.41    2.91 
  -7  -1   6   51.11    3.02 
  -1   8   6   46.97    2.56 
  -1   8   6   50.22    3.22 
   7   1   6   45.17    2.85 
   1  -8   6   45.29    2.94 
  -8   7   6   41.16    2.81 
   8  -8  -6   21.59    2.64 
   0  -8  -6   16.91    2.13 
   8   0  -6   23.68    2.87 
  -8   0  -6   24.20    2.53 
  -8   8  -6   24.84    2.66 
   0   8  -6   24.37    2.55 
   0   8  -6   16.30    2.00 
   8   0   6   23.38    2.45 
  -8   0   6   26.26    2.63 
  -8   8   6   25.59    2.55 
   0   8   6   22.99    2.75 
   0  -8   6   21.50    2.32 
  -1  -8  -6   13.86    1.96 
   9  -1  -6   19.64    2.69 
   1   8  -6   15.60    2.19 
  -9   1  -6   14.39    2.02 
  -8   9  -6   16.93    2.35 
   1   8  -6   20.91    2.39 
   8  -9  -6   14.80    2.52 
  -8   9   6   16.01    2.24 
  -9   1   6   16.25    2.22 
   1   8   6   15.33    2.38 
  -1  -8   6   14.08    2.04 
   9  -1   6   16.54    2.11 
   7  -9  -6   14.60    2.28 
   2   7  -6   17.44    2.08 
  -7   9  -6   15.79    2.29 
   2   7  -6   18.71    2.43 
  -9   2  -6   18.27    2.33 
  -2  -7  -6   22.70    2.40 
   9  -2  -6   15.94    2.49 
  -2  -7   6   15.83    2.11 
   2   7   6   15.51    2.21 
  -7   9   6   19.60    2.37 
   9  -2   6   15.16    2.08 
  -9   2   6   14.38    2.11 
  -6   9  -6   43.01    3.02 
   3   6  -6   47.75    2.97 
   9  -3  -6   40.76    3.21 
   3   6  -6   42.00    3.05 
   6  -9  -6   42.58    3.26 
  -3  -6  -6   44.13    2.83 
  -9   3  -6   40.56    2.84 
   9  -3   6   47.87    2.95 
  -9   3   6   42.56    2.75 
  -3  -6   6   43.27    2.78 
   3   6   6   47.53    3.14 
  -6   9   6   47.26    2.95 
   9  -4  -6   12.46    2.09 
  -4  -5  -6   11.65    1.75 
  -5   9  -6   14.13    2.07 
  -9   4  -6    8.22    1.65 
   5  -9  -6   12.02    1.62 
   4   5  -6    8.99    1.55 
   5  -9  -6   10.20    2.00 
   4   5  -6   12.39    2.01 
   4   5   6   13.22    1.98 
  -4  -5   6   10.92    1.83 
  -9   4   6   11.96    1.59 
  -5   9   6   13.04    1.80 
  -9   4   6   11.73    1.69 
   9  -4   6   10.16    1.69 
  -9   5  -6    7.76    1.54 
  -4   9  -6    9.81    1.83 
   5   4  -6    5.99    1.59 
   5   4  -6    6.50    1.39 
   9  -5  -6    8.73    1.89 
  -4   9  -6    9.38    1.41 
  -4   9  -6    8.47    1.56 
   4  -9  -6    8.66    1.51 
  -5  -4  -6    4.99    1.27 
   9  -5   6    8.89    1.53 
   5   4   6    7.51    1.67 
  -9   5   6    9.16    1.54 
  -4   9   6   10.45    2.07 
  -4   9   6    7.57    1.44 
  -9   5   6    6.53    1.39 
  -5  -4   6    7.83    1.52 
  -3   9  -6   71.88    3.60 
  -9   6  -6   64.23    3.60 
   6   3  -6   59.44    3.07 
  -3   9  -6   61.34    3.04 
  -6  -3  -6   63.89    3.11 
   3  -9  -6   63.03    3.17 
   6   3  -6   53.54    3.49 
   9  -6  -6   63.80    3.91 
  -6  -3  -6   62.89    3.08 
  -3   9   6   58.41    3.09 
  -9   6   6   63.67    3.30 
   6   3   6   63.41    3.52 
  -6  -3   6   58.70    3.44 
  -9   6   6   59.63    3.06 
   9  -6   6   60.96    3.09 
  -3   9   6   67.65    4.00 
   3  -9   6   59.84    3.35 
   7   2  -6    6.99    1.36 
   9  -7  -6    9.75    1.94 
  -2   9  -6    5.58    1.33 
   7   2  -6    9.34    1.95 
  -2   9  -6    9.01    1.74 
   2  -9  -6    6.85    1.42 
  -7  -2  -6   10.20    1.66 
  -9   7  -6    9.50    1.81 
  -7  -2  -6    7.61    1.35 
  -9   7   6    8.83    1.62 
  -2   9   6    8.80    1.49 
  -7  -2   6    5.69    1.54 
   7   2   6    8.14    1.67 
  -2   9   6    8.38    1.94 
   2  -9   6    7.01    1.64 
   9  -8  -6   12.52    2.24 
  -8  -1  -6   13.29    1.92 
   1  -9  -6    9.04    1.67 
  -1   9  -6   12.23    1.81 
  -1   9  -6   11.93    1.97 
  -9   8  -6    9.88    1.81 
   8   1  -6   14.19    2.31 
  -9   8   6    9.51    1.72 
   8   1   6   12.82    2.01 
   1  -9   6   11.17    1.77 
  -8  -1   6   13.17    2.11 
  -1   9   6   12.91    2.27 
   0   9  -6   48.26    3.45 
   9   0  -6   49.93    3.83 
  -9   0  -6   44.87    3.14 
   0  -9  -6   46.91    3.18 
  -9   9  -6   51.60    3.47 
   9  -9  -6   42.36    4.00 
   0   9  -6   47.71    3.10 
   0   9   6   51.91    3.79 
  -9   0   6   44.08    3.15 
  -9   9   6   48.13    3.29 
   9   0   6   48.49    3.27 
   0  -9   6   53.43    3.27 
 -10   1  -6   10.18    1.93 
   1   9  -6    6.11    1.76 
  -1  -9  -6    2.20    1.43 
  -9  10  -6    5.89    1.69 
   1   9  -6    7.14    1.66 
  10  -1  -6    1.48    1.68 
   9 -10  -6    8.26    2.09 
  10  -1   6    6.52    1.79 
   1   9   6    5.73    1.75 
  -1  -9   6    3.35    1.41 
 -10   1   6    5.34    1.66 
  -9  10   6    6.48    1.72 
  -2  -8  -6   59.43    3.54 
  -8  10  -6   60.62    3.83 
   2   8  -6   60.54    3.58 
 -10   2  -6   53.03    3.54 
   2   8  -6   54.77    3.71 
  10  -2  -6   57.98    4.24 
   8 -10  -6   57.52    4.14 
   2   8   6   56.32    3.88 
 -10   2   6   54.73    3.57 
  -2  -8   6   59.92    3.53 
  10  -2   6   57.48    3.58 
  -8  10   6   64.68    3.76 
  -7  10  -6   16.92    2.38 
   3   7  -6   17.69    2.44 
   3   7  -6   22.07    2.54 
  10  -3  -6   15.89    2.56 
   7 -10  -6   16.25    2.57 
 -10   3  -6   22.48    2.71 
  -3  -7  -6   18.68    2.31 
  10  -3   6   19.66    2.43 
  -3  -7   6   14.34    2.09 
 -10   3   6   20.79    2.51 
   3   7   6   14.62    2.29 
  -7  10   6   16.75    2.21 
  -6  10  -6   13.58    2.16 
 -10   4  -6   15.95    2.23 
  10  -4  -6   21.89    2.76 
   6 -10  -6   23.92    2.97 
  -4  -6  -6   19.77    2.34 
   4   6  -6   21.68    2.43 
   4   6  -6   18.52    2.53 
  10  -4   6   23.05    2.51 
   4   6   6   18.06    2.43 
 -10   4   6   19.86    2.42 
  -6  10   6   20.97    2.49 
  -4  -6   6   23.00    2.54 
   5 -10  -6   48.50    3.57 
   5   5  -6   48.74    3.47 
  10  -5  -6   46.69    3.54 
 -10   5  -6   49.91    3.23 
   5   5  -6   49.19    3.08 
  -5  -5  -6   50.12    3.05 
   5 -10  -6   47.96    2.84 
  -5  10  -6   52.33    3.40 
 -10   5   6   46.90    2.81 
   5   5   6   57.12    3.48 
  -5  -5   6   50.96    3.21 
  -5  10   6   50.51    3.14 
 -10   5   6   51.25    3.08 
  10  -5   6   45.76    2.95 
   6   4  -6   16.36    2.11 
  -6  -4  -6   15.16    1.94 
  -4  10  -6   14.83    1.87 
   6   4  -6   15.87    2.33 
  10  -6  -6   12.46    2.21 
   4 -10  -6   17.18    2.09 
 -10   6  -6   20.92    2.63 
  -4  10   6   19.67    2.29 
   6   4   6   18.15    2.48 
  -6  -4   6   13.95    2.11 
 -10   6   6   16.90    2.08 
  -4  10   6   17.41    2.83 
 -10   6   6   17.54    2.13 
   4 -10   6   17.14    2.30 
  -7  -3  -6   17.06    2.06 
   7   3  -6   23.66    2.85 
 -10   7  -6   20.46    2.60 
  -3  10  -6   23.71    2.41 
   7   3  -6   18.08    2.15 
  -7  -3  -6   16.92    2.18 
   3 -10  -6   20.36    2.33 
  10  -7  -6   18.85    2.83 
  -3  10   6   16.38    2.65 
   3 -10   6   19.43    2.42 
 -10   7   6   19.33    2.31 
  -7  -3   6   17.10    2.41 
   7   3   6   23.82    2.82 
  -3  10   6   22.52    2.33 
  -8  -2  -6   69.58    3.64 
 -10   8  -6   66.21    3.93 
  10  -8  -6   59.89    4.06 
  -2  10  -6   63.46    3.52 
   2 -10  -6   66.66    3.69 
   8   2  -6   65.55    4.15 
 -10   8   6   65.88    3.78 
  -8  -2   6   66.62    3.90 
  -2  10   6   66.62    4.38 
   8   2   6   64.95    3.89 
  10  -9  -6   13.85    2.51 
  -9  -1  -6   12.42    2.16 
 -10   9  -6   18.56    2.54 
   1 -10  -6   12.23    2.13 
   9   1  -6   12.37    2.35 
  -1  10  -6   12.27    1.98 
 -10   9   6    7.84    1.79 
  -9  -1   6   12.38    2.14 
  -1  10   6   11.75    2.35 
   9   1   6    9.98    2.01 
   0 -10  -6    6.63    1.76 
  10   0  -6   10.36    2.38 
  10 -10  -6    6.61    1.92 
   0  10  -6    7.56    1.70 
 -10  10  -6    8.44    2.09 
 -10   0  -6    8.43    1.95 
   0  10   6    6.77    1.91 
 -10  10   6    5.79    1.72 
 -10   0   6   10.69    2.16 
  10   0   6    6.46    1.81 
 -10  11  -6   28.18    3.36 
 -11   1  -6   27.11    3.15 
  10 -11  -6   31.84    3.93 
  -1 -10  -6   32.08    3.32 
  11  -1  -6   27.09    3.64 
 -11   1   6   34.31    3.58 
 -10  11   6   36.03    3.62 
  11  -1   6   27.74    3.19 
   1  10   6   20.83    3.14 
  -1 -10   6   26.88    3.09 
 -11   2  -6   10.63    2.17 
   9 -11  -6   13.97    2.71 
  11  -2  -6   16.81    2.96 
   2   9  -6   16.11    2.61 
   2   9  -6   12.07    2.13 
  -2  -9  -6   11.38    2.13 
  -9  11  -6   14.14    2.40 
  11  -2   6   15.08    2.48 
  -2  -9   6   17.56    2.44 
   2   9   6   12.57    2.44 
 -11   2   6   14.48    2.32 
  -9  11   6   14.89    2.37 
   3   8  -6    8.02    2.02 
 -11   3  -6    8.30    1.84 
  11  -3  -6    9.42    2.25 
  -8  11  -6    6.98    1.80 
  -3  -8  -6    8.11    1.77 
   8 -11  -6    9.28    2.33 
   3   8  -6    7.44    1.70 
  11  -3   6    9.06    2.01 
  -3  -8   6   10.15    1.90 
  -8  11   6    5.23    1.68 
 -11   3   6    4.60    1.49 
   3   8   6    6.45    1.92 
  -7  11  -6   32.92    3.39 
  -4  -7  -6   42.36    3.16 
 -11   4  -6   45.72    3.46 
   4   7  -6   39.69    3.44 
  11  -4  -6   37.71    3.89 
   4   7  -6   40.08    3.74 
   7 -11  -6   51.46    4.51 
   4   7   6   36.46    3.56 
  -4  -7   6   38.53    3.38 
 -11   4   6   35.15    3.29 
  11  -4   6   36.72    3.48 
  -7  11   6   44.29    3.72 
   5   6  -6    5.32    1.80 
  11  -5  -6    9.12    2.13 
   6 -11  -6    7.22    1.89 
  -5  -6  -6    9.12    1.83 
 -11   5  -6    6.94    1.72 
   5   6  -6    6.44    1.60 
  11  -5   6    4.80    1.62 
   5   6   6    6.90    1.88 
  -5  -6   6    7.84    1.76 
  -6  11   6    8.92    1.81 
 -11   5   6    9.37    1.80 
   5 -11  -6   10.40    2.20 
   6   5  -6   14.48    2.39 
  -6  -5  -6   13.44    2.03 
   6   5  -6   14.00    2.13 
  11  -6  -6   14.46    2.51 
 -11   6  -6   12.76    2.18 
   6   5   6   13.37    2.31 
  -5  11   6   12.00    2.05 
  -6  -5   6   17.53    2.49 
 -11   6   6    9.47    1.78 
 -11   6   6   13.81    2.06 
  11  -7  -6   38.64    3.87 
 -11   7  -6   41.54    3.67 
   4 -11  -6   33.18    3.09 
  -7  -4  -6   34.22    2.94 
   7   4  -6   38.96    2.87 
   7   4  -6   32.98    3.54 
   4 -11   6   39.38    2.91 
 -11   7   6   38.10    3.28 
  -4  11   6   38.83    3.31 
  -7  -4   6   32.85    3.28 
   7   4   6   31.64    3.35 
  -4  11   6   43.22    4.41 
   8   3  -6    9.91    2.27 
 -11   8  -6    8.06    1.95 
  11  -8  -6   10.73    2.43 
   3 -11  -6   10.18    1.98 
  -8  -3   6    9.04    2.00 
   3 -11   6   11.16    1.98 
  -3  11   6    9.21    2.35 
 -11   8   6    6.75    1.77 
   8   3   6   12.00    2.32 
   2 -11  -6    4.71    1.59 
  11  -9  -6   11.72    2.44 
  -9  -2  -6    8.12    1.89 
 -11   9  -6    9.19    2.17 
   9   2  -6    5.93    1.84 
  -2  11   6    9.07    2.41 
   9   2   6    7.58    2.00 
   2 -11   6   11.18    2.07 
 -11   9   6    5.26    1.68 
  -9  -2   6    8.55    2.08 
   1 -11  -6   31.56    3.26 
 -10  -1  -6   32.97    3.31 
 -11  10  -6   36.34    3.73 
  10   1  -6   31.51    3.58 
  11 -10  -6   31.98    3.87 
  -1  11   6   30.37    3.81 
  10   1   6   32.30    3.52 
 -10  -1   6   31.63    3.52 
 -11  10   6   33.60    3.45 
   1 -11   6   32.34    3.31 
 -11  11  -6    9.40    2.35 
   3   9  -6   36.91    3.84 
  12  -3   6   35.18    3.57 
   4   8  -6    5.17    1.89 
  12  -4  -6    3.47    2.11 
  -4  -8  -6    6.05    1.80 
   4   8  -6    2.33    1.38 
   4   8   6    1.49    1.55 
  12  -4   6    6.03    1.88 
  -4  -8   6    5.39    1.81 
 -12   4   6    6.19    1.79 
  -8  12   6    6.78    1.93 
 -12   5  -6    9.45    2.14 
   7 -12  -6    4.24    1.93 
  -5  -7  -6   10.01    2.01 
   5   7  -6    6.73    2.03 
   5   7  -6   10.51    2.10 
  12  -5  -6    9.82    2.51 
 -12   5   6    8.37    1.97 
   5   7   6    7.09    2.11 
  -7  12   6    6.62    1.83 
  -5  -7   6   12.60    2.18 
  -6  -6  -6   44.07    3.66 
   6 -12  -6   41.34    4.22 
 -12   6  -6   39.24    3.76 
   6   6  -6   45.40    4.27 
  12  -6  -6   43.31    4.24 
   6   6  -6   38.55    3.47 
   6   6   6   39.64    3.88 
  -6  -6   6   45.92    3.90 
 -12   6   6   47.95    3.45 
  -6  12   6   39.99    3.50 
   7   5  -6    8.32    1.87 
   7   5  -6    5.79    1.90 
  12  -7  -6    7.97    2.08 
  -7  -5  -6    8.59    1.90 
   5 -12  -6    9.96    2.34 
 -12   7  -6    4.60    1.78 
   7   5   6    9.76    2.23 
  -5  12   6    9.00    1.97 
  -7  -5   6    7.41    2.04 
 -12   8  -6    7.84    2.08 
   8   4  -6   12.55    2.49 
   4 -12  -6   13.52    2.21 
   8   4   6   11.90    2.48 
  -8  -4   6   10.67    2.25 
 -12   8   6   10.42    2.11 
   9   3  -6   20.33    3.17 
   3 -12  -6   35.08    3.35 
 -12   9  -6   26.80    3.24 
   9   3   6   35.48    3.76 
   3 -12   6   35.54    3.46 
 -12   9   6   32.40    3.38 
   0   0  -7    0.02    0.24 
   0   0  -7    0.80    0.58 
   0   0  -7   -0.40    0.43 
   0   0   7   -0.58    0.54 
   0   1  -7   73.39    2.67 
   1  -1  -7   78.51    2.22 
   0  -1  -7   71.57    2.66 
   0  -1  -7   75.67    2.33 
  -1   1  -7   77.53    2.76 
   1   0  -7   74.25    2.03 
  -1   0  -7   76.35    2.81 
   1   0  -7   70.87    2.72 
   0   1  -7   75.38    1.56 
   0   1  -7   76.70    2.74 
  -1   1  -7   74.51    2.75 
  -1   0  -7   80.80    2.53 
   0   1   7   72.20    2.76 
  -1   0   7   72.19    2.67 
  -1   0   7   72.98    2.56 
   0   1   7   76.85    2.18 
  -1   1   7   75.08    2.76 
   1   0   7   75.14    1.85 
  -1   1   7   74.53    2.39 
   1  -2  -7   16.43    1.49 
  -2   1  -7   16.52    1.47 
  -1  -1  -7   15.15    1.39 
  -2   1  -7   16.63    1.44 
   1   1  -7   14.26    1.42 
   2  -1  -7   12.87    1.35 
  -1  -1  -7   13.69    0.98 
  -1   2  -7   13.70    1.29 
  -1   2  -7   12.82    1.39 
   2  -1  -7   11.71    1.08 
  -1   2   7   16.26    1.54 
   1   1   7   13.82    0.95 
   1   1   7   17.13    1.82 
  -1   2   7   15.10    1.14 
  -2   1   7   13.45    1.26 
  -1   2   7   13.58    0.90 
   2  -1   7   13.31    0.64 
  -1  -1   7   14.24    1.46 
  -2   1   7   14.74    1.09 
  -1  -1   7   19.30    1.64 
   0   2  -7   90.88    3.25 
  -2   2  -7   93.44    3.21 
   2   0  -7   87.54    2.68 
   0  -2  -7   93.99    2.49 
   0   2  -7   87.04    2.97 
   2  -2  -7   90.18    2.84 
   0  -2  -7   87.64    2.98 
  -2   0  -7   94.15    2.99 
  -2   2  -7   96.22    3.02 
  -2   0  -7   90.77    2.82 
   2  -2  -7   94.37    3.27 
   0   2  -7   97.78    2.17 
   2   0  -7   97.28    3.11 
  -2   2   7   98.21    3.08 
  -2   2   7   96.43    2.58 
  -2   0   7   93.07    2.96 
  -2   0   7   89.21    2.85 
   0  -2   7   97.79    3.36 
   0   2   7   95.56    3.27 
   0   2   7   90.99    2.77 
   2   0   7   95.58    2.41 
   1   2  -7   88.82    2.53 
  -3   1  -7   89.09    2.96 
  -1  -2  -7   89.78    2.43 
  -2   3  -7   86.60    3.36 
   1   2  -7   85.79    2.96 
   2  -3  -7   95.37    3.10 
   3  -1  -7   84.72    2.97 
  -3   1  -7   91.07    3.05 
   3  -1  -7   85.69    2.89 
  -2   3  -7   88.52    2.86 
  -1  -2  -7   92.01    3.01 
   2  -3  -7   84.63    2.95 
   2  -3   7   88.50    1.92 
  -3   1   7   90.47    2.84 
   1   2   7   84.46    2.74 
  -2   3   7   90.43    2.18 
   1   2   7   83.03    3.18 
  -1  -2   7   86.24    3.19 
  -3   1   7   85.81    2.79 
   3  -1   7   87.92    2.33 
  -3   2  -7  105.44    3.28 
  -1   3  -7  106.17    3.72 
  -2  -1  -7  105.59    3.24 
   3  -2  -7  109.76    3.34 
  -3   2  -7  102.94    3.41 
   3  -2  -7  108.92    3.47 
   2   1  -7  101.93    3.02 
  -2  -1  -7  107.19    3.03 
  -1   3  -7  110.91    2.47 
  -1   3  -7  111.39    3.32 
   2   1  -7  113.50    3.45 
   3  -2   7  106.77    2.47 
  -2  -1   7  108.52    3.11 
  -1   3   7  106.79    3.37 
  -3   2   7  106.91    3.31 
  -2  -1   7  115.42    3.55 
  -1   3   7  108.93    3.51 
  -1   3   7  109.61    2.44 
   2   1   7  107.68    2.99 
  -3   2   7  110.20    3.01 
  -3   0  -7    1.99    0.64 
   0   3  -7    3.01    0.54 
   3   0  -7    1.10    0.80 
  -3   0  -7    2.85    0.73 
   0  -3  -7    3.50    0.82 
   0   3  -7    2.87    0.68 
   3  -3  -7    3.18    0.78 
   0  -3  -7    3.38    0.50 
  -3   3  -7    2.46    0.67 
   3  -3  -7    2.88    0.84 
   3   0  -7    2.33    0.73 
  -3   3  -7    2.61    0.81 
  -3   3   7    2.89    0.54 
   3  -3   7    3.58    0.44 
   0   3   7    1.96    0.69 
  -3   0   7    1.96    0.70 
   3   0   7    2.92    0.60 
  -3   0   7    3.13    0.68 
   0  -3   7    1.99    0.76 
   0   3   7    4.22    0.93 
  -3   3   7    3.52    0.81 
   3  -4  -7   60.07    2.69 
  -4   1  -7   56.38    2.28 
  -1  -3  -7   53.30    2.37 
   4  -1  -7   54.70    2.45 
  -3   4  -7   56.36    2.22 
   1   3  -7   54.28    2.10 
   3  -4  -7   56.31    2.37 
   1   3  -7   53.52    2.40 
  -1  -3  -7   54.66    1.75 
  -4   1  -7   52.40    2.36 
   4  -1  -7   57.58    2.35 
  -1  -3   7   59.54    2.72 
   1   3   7   57.90    2.58 
   3  -4   7   57.97    1.75 
  -3   4   7   57.38    1.57 
  -4   1   7   57.97    2.39 
   1   3   7   54.30    2.34 
  -3   4   7   53.71    2.44 
  -4   1   7   56.46    2.17 
   4  -1   7   55.52    2.03 
   4  -2  -7    0.33    0.55 
   2   2  -7   -0.06    0.55 
   2   2  -7   -0.31    0.44 
   2  -4  -7    0.18    0.55 
  -2  -2  -7   -0.46    0.44 
  -2  -2  -7    0.22    0.38 
   4  -2  -7    0.54    0.59 
  -4   2  -7    0.86    0.53 
  -2   4  -7   -0.89    0.46 
  -4   2  -7   -0.40    0.57 
  -2   4  -7   -0.47    0.37 
   2   2   7   -0.98    0.52 
  -2  -2   7   -0.08    0.42 
  -4   2   7   -0.43    0.47 
   4  -2   7   -0.75    0.34 
  -2  -2   7    0.45    0.62 
  -4   2   7   -0.14    0.43 
  -2   4   7    0.41    0.55 
  -2   4   7    1.12    0.70 
   2  -4   7    0.47    0.34 
   2   2   7    1.29    0.56 
   3   1  -7   72.36    2.71 
  -1   4  -7   68.79    2.65 
  -1   4  -7   72.68    3.19 
   4  -3  -7   73.81    2.79 
   4  -3  -7   74.76    2.94 
  -1   4  -7   73.65    2.21 
  -4   3  -7   70.21    2.46 
  -3  -1  -7   70.52    2.62 
   3   1  -7   62.79    2.57 
   1  -4  -7   68.87    2.75 
  -4   3  -7   70.93    2.89 
  -3  -1  -7   72.83    2.54 
  -4   3   7   69.63    2.71 
  -3  -1   7   70.72    2.83 
  -4   3   7   71.29    2.35 
   3   1   7   67.36    2.48 
  -1   4   7   70.77    2.87 
  -1   4   7   67.89    2.74 
  -3  -1   7   74.61    2.29 
   4  -3   7   71.45    2.08 
   4   0  -7   36.59    2.03 
   0  -4  -7   30.41    1.85 
  -4   4  -7   36.87    2.14 
   0   4  -7   35.65    1.66 
   4   0  -7   32.72    1.84 
  -4   4  -7   36.55    1.68 
  -4   0  -7   36.35    1.78 
   4  -4  -7   36.01    2.03 
  -4   0  -7   38.50    1.95 
   0   4  -7   36.10    1.94 
   4  -4  -7   33.11    2.05 
   4  -4   7   35.43    1.45 
  -4   4   7   34.90    1.42 
   4   0   7   35.69    1.73 
   0  -4   7   38.65    2.32 
   0   4   7   36.66    1.98 
  -4   0   7   35.34    1.60 
  -4   4   7   38.84    2.08 
  -4   0   7   36.72    2.00 
   0   4   7   32.81    1.97 
   4  -5  -7    0.79    0.65 
  -5   1  -7    2.18    0.64 
   1   4  -7    0.78    0.61 
  -4   5  -7    0.66    0.71 
   1   4  -7    1.37    0.62 
  -4   5  -7    1.00    0.56 
  -5   1  -7    1.87    0.77 
   5  -1  -7    0.10    0.66 
  -1  -4  -7    1.84    0.68 
   4  -5  -7    0.53    0.72 
   5  -1  -7    2.12    0.74 
   1   4   7    0.28    0.62 
  -1  -4   7    1.89    0.93 
   4  -5   7    1.26    0.52 
  -4   5   7    0.82    0.68 
   5  -1   7    2.16    0.68 
  -5   1   7    1.22    0.65 
  -5   1   7    0.99    0.56 
   1   4   7    0.87    0.66 
  -2  -3  -7   59.16    2.06 
  -3   5  -7   59.01    2.36 
  -5   2  -7   56.27    2.64 
  -5   2  -7   59.11    2.39 
  -3   5  -7   60.68    2.91 
   3  -5  -7   57.29    2.82 
   3  -5  -7   64.34    2.56 
  -2  -3  -7   59.16    2.55 
   2   3  -7   59.27    2.58 
   5  -2  -7   64.33    2.47 
   5  -2  -7   57.42    2.76 
   2   3  -7   55.01    2.46 
   3  -5   7   60.53    2.03 
   2   3   7   56.16    2.57 
  -3   5   7   57.00    2.62 
  -5   2   7   58.97    2.38 
   2   3   7   59.31    2.61 
  -5   2   7   58.02    2.47 
  -2  -3   7   57.93    2.76 
   5  -2   7   60.62    2.26 
  -3  -2  -7   81.26    2.70 
   3   2  -7   79.79    3.02 
  -2   5  -7   80.47    2.59 
   5  -3  -7   79.09    2.89 
  -5   3  -7   76.03    2.61 
   3   2  -7   81.22    3.07 
   2  -5  -7   80.22    3.04 
  -5   3  -7   82.69    3.24 
  -2   5  -7   82.51    3.51 
   5  -3  -7   78.19    3.24 
  -2   5  -7   77.74    2.88 
  -3  -2  -7   80.01    2.95 
   3   2   7   81.94    3.00 
  -5   3   7   81.76    2.99 
   5  -3   7   81.34    2.55 
  -5   3   7   81.67    2.82 
  -3  -2   7   84.79    3.33 
   3   2   7   81.82    3.21 
  -2   5   7   83.47    3.12 
  -2   5   7   76.76    3.31 
  -4  -1  -7    7.56    1.14 
   5  -4  -7    5.91    1.12 
  -5   4  -7    8.19    1.27 
   1  -5  -7    5.27    0.99 
  -1   5  -7    6.16    1.05 
  -1   5  -7    9.05    1.04 
  -4  -1  -7    6.86    1.05 
   4   1  -7    7.22    1.25 
   5  -4  -7    8.98    1.23 
   4   1  -7    5.32    0.97 
  -5   4  -7    5.71    0.81 
  -4  -1   7    6.46    1.15 
   4   1   7    6.00    1.04 
  -1   5   7    6.66    1.10 
  -5   4   7    5.54    0.86 
   5  -4   7    7.01    0.87 
  -5   4   7    5.71    1.01 
   1  -5   7    8.09    1.38 
  -1   5   7    6.95    1.18 
   5  -5  -7   72.73    3.44 
   0  -5  -7   74.15    3.07 
   5   0  -7   72.30    3.24 
  -5   5  -7   79.70    3.38 
   5  -5  -7   80.21    3.06 
   5   0  -7   77.84    2.89 
  -5   5  -7   81.65    2.56 
   0   5  -7   84.41    2.91 
  -5   0  -7   83.13    3.12 
  -5   0  -7   76.18    2.77 
   0   5  -7   76.71    3.11 
  -5   0   7   77.03    3.21 
  -5   0   7   74.02    2.55 
  -5   5   7   70.49    3.08 
   0   5   7   75.40    3.03 
   0   5   7   77.20    3.33 
   5  -5   7   76.39    2.75 
   0  -5   7   82.11    3.60 
   5   0   7   79.74    2.94 
  -5   6  -7   59.80    2.32 
   6  -1  -7   63.93    2.57 
  -6   1  -7   65.74    2.47 
  -5   6  -7   64.13    3.20 
   1   5  -7   58.33    2.85 
   6  -1  -7   56.85    3.13 
  -6   1  -7   60.16    2.87 
   5  -6  -7   65.19    3.37 
  -1  -5  -7   61.89    2.90 
   5  -6  -7   64.43    2.73 
   1   5  -7   66.66    2.87 
  -6   1   7   61.84    2.38 
   6  -1   7   68.57    2.81 
  -5   6   7   73.03    3.16 
  -1  -5   7   61.25    3.13 
   1   5   7   66.24    3.12 
  -6   1   7   67.63    3.06 
   1   5   7   65.16    2.78 
  -6   2  -7   38.06    1.96 
  -4   6  -7   37.49    1.87 
   2   4  -7   38.59    2.23 
   6  -2  -7   37.53    1.92 
  -6   2  -7   42.39    2.37 
   4  -6  -7   37.75    2.55 
   4  -6  -7   38.51    2.08 
  -4   6  -7   37.48    2.61 
   2   4  -7   41.17    2.31 
  -2  -4  -7   40.35    2.28 
   6  -2  -7   36.49    2.48 
  -4   6   7   39.55    2.34 
   2   4   7   37.87    2.32 
   2   4   7   38.38    2.19 
   6  -2   7   40.29    2.04 
  -2  -4   7   37.45    2.43 
  -6   2   7   38.28    1.98 
  -6   2   7   35.14    2.15 
  -3  -3  -7    2.71    0.85 
  -3   6  -7    1.58    0.70 
  -6   3  -7    2.65    1.00 
   6  -3  -7    2.47    1.01 
   3   3  -7    1.95    0.86 
  -3  -3  -7    1.69    0.67 
   6  -3  -7    4.40    0.86 
   3  -6  -7    2.68    0.87 
  -3   6  -7    1.47    0.97 
   3   3  -7    2.47    0.91 
  -6   3   7    3.17    0.86 
   3   3   7    3.08    0.97 
  -6   3   7    3.38    0.84 
   6  -3   7    1.85    0.72 
  -3  -3   7    1.67    0.92 
  -3   6   7    2.96    0.88 
  -3   6   7    2.41    1.03 
   3   3   7    1.81    0.80 
   4   2  -7   48.58    2.46 
  -2   6  -7   53.38    3.07 
  -6   4  -7   53.49    2.84 
   4   2  -7   50.01    2.68 
  -2   6  -7   55.46    2.57 
  -2   6  -7   55.56    2.37 
  -4  -2  -7   52.23    2.48 
  -4  -2  -7   60.05    2.47 
   6  -4  -7   56.58    2.43 
   6  -4  -7   54.18    2.95 
   2  -6  -7   58.17    2.70 
  -4  -2   7   52.14    2.71 
  -2   6   7   55.61    2.68 
   4   2   7   58.40    2.79 
  -2   6   7   56.30    3.03 
   4   2   7   55.37    2.66 
   6  -4   7   60.37    2.33 
  -6   4   7   55.85    2.33 
  -6   4   7   54.35    2.62 
   6  -5  -7   65.73    3.32 
   1  -6  -7   62.16    2.89 
  -1   6  -7   62.60    2.87 
   5   1  -7   61.35    3.19 
  -5  -1  -7   65.25    2.74 
  -1   6  -7   74.31    2.85 
  -5  -1  -7   66.81    2.85 
  -6   5  -7   66.70    3.20 
   6  -5  -7   69.31    2.81 
   5   1  -7   68.69    2.81 
  -5  -1   7   64.94    3.05 
  -6   5   7   62.11    2.41 
   5   1   7   63.77    2.83 
  -1   6   7   68.03    3.32 
  -1   6   7   62.18    2.83 
  -6   5   7   66.31    3.02 
   1  -6   7   60.91    3.25 
   6   0  -7    2.57    1.22 
  -6   0  -7   -0.15    0.52 
  -6   0  -7   -0.10    0.69 
  -6   6  -7   -0.09    0.76 
   6   0  -7    0.85    0.66 
   6  -6  -7    1.10    1.04 
   0   6  -7   -1.04    0.55 
   6  -6  -7   -0.56    0.65 
   0   6  -7    1.08    0.73 
   0  -6  -7    0.10    0.79 
   6   0   7   -0.89    0.63 
  -6   6   7    1.44    0.81 
   0  -6   7   -0.36    0.97 
   0   6   7   -0.43    0.82 
  -6   0   7    0.54    0.87 
   0   6   7    0.59    0.69 
  -1  -6  -7   71.17    3.33 
   7  -1  -7   73.69    2.85 
   7  -1  -7   72.49    3.78 
  -6   7  -7   66.32    3.44 
   1   6  -7   79.09    3.44 
   1   6  -7   68.98    3.23 
  -7   1  -7   76.47    3.46 
   6  -7  -7   74.26    3.87 
  -1  -6   7   74.95    3.63 
  -6   7   7   77.32    3.52 
   1   6   7   69.75    2.99 
  -7   1   7   63.63    3.30 
   7  -1   7   75.42    3.25 
   1   6   7   74.10    3.64 
   2   5  -7    1.05    0.83 
  -5   7  -7    0.45    0.56 
  -2  -5  -7   -0.41    0.68 
   2   5  -7    1.34    0.73 
  -5   7  -7    1.71    1.00 
   7  -2  -7   -0.05    1.00 
   5  -7  -7    1.33    1.00 
  -7   2  -7    0.74    0.79 
   5  -7  -7    1.83    0.81 
   2   5   7    0.91    0.75 
  -2  -5   7    0.98    0.99 
  -7   2   7    0.01    0.71 
   2   5   7   -0.04    0.69 
   7  -2   7    1.15    0.84 
  -5   7   7    1.84    0.98 
  -7   2   7    1.64    0.74 
   3   4  -7   75.88    3.33 
   3   4  -7   74.38    3.39 
   4  -7  -7   79.04    3.15 
  -7   3  -7   85.07    3.63 
  -4   7  -7   66.12    3.59 
   4  -7  -7   71.71    3.66 
  -4   7  -7   75.01    2.92 
   7  -3  -7   70.23    3.64 
  -3  -4  -7   69.64    3.14 
  -7   3   7   76.65    3.01 
  -7   3   7   73.21    3.15 
   3   4   7   73.69    3.11 
  -4   7   7   72.30    3.28 
   3   4   7   80.11    3.46 
  -3  -4   7   81.18    3.59 
   7  -3   7   76.13    3.07 
   4   3  -7   54.62    2.79 
   4   3  -7   58.73    3.06 
  -4  -3  -7   63.23    2.61 
  -3   7  -7   65.89    2.83 
   7  -4  -7   62.70    3.37 
  -3   7  -7   68.72    3.53 
  -4  -3  -7   60.98    2.86 
  -7   4  -7   60.62    3.12 
   3  -7  -7   56.65    2.77 
   7  -4   7   66.39    2.75 
  -7   4   7   66.11    2.94 
   4   3   7   57.56    2.90 
  -7   4   7   62.42    2.77 
   4   3   7   66.55    3.17 
  -3   7   7   64.48    3.51 
  -3   7   7   56.88    2.91 
  -4  -3   7   57.70    3.12 
  -7   5  -7    2.16    0.98 
   7  -5  -7    2.73    1.15 
  -5  -2  -7    2.35    0.85 
   2  -7  -7    1.67    0.90 
   5   2  -7    1.25    0.97 
   5   2  -7    2.03    0.86 
  -2   7  -7    1.95    0.87 
  -2   7  -7    1.90    0.86 
  -5  -2  -7    3.89    0.96 
   5   2   7    2.21    0.96 
  -2   7   7    2.18    0.88 
  -7   5   7    0.58    0.77 
  -2   7   7    0.44    0.89 
  -7   5   7    2.67    0.84 
  -5  -2   7    3.77    1.20 
   2  -7   7    1.06    1.03 
  -6  -1  -7   23.37    1.94 
   1  -7  -7   25.02    2.24 
  -1   7  -7   22.07    2.09 
  -6  -1  -7   26.39    1.97 
  -1   7  -7   24.35    2.18 
   7  -6  -7   24.15    2.48 
   6   1  -7   26.20    2.59 
   6   1  -7   23.92    2.10 
  -7   6  -7   25.09    2.49 
  -6  -1   7   22.39    2.29 
   6   1   7   22.70    2.13 
  -7   6   7   24.69    2.26 
  -1   7   7   22.36    2.05 
   1  -7   7   22.75    2.39 
  -1   7   7   21.63    2.33 
   0  -7  -7   40.56    2.62 
   0   7  -7   42.49    2.63 
   7  -7  -7   43.03    2.99 
  -7   0  -7   38.99    2.58 
  -7   7  -7   39.90    2.73 
   0   7  -7   43.45    2.65 
   7   0  -7   36.91    2.20 
   7   0  -7   41.84    2.98 
  -7   0   7   35.80    2.57 
   0   7   7   41.75    2.40 
   0  -7   7   48.94    3.01 
   7   0   7   45.07    2.68 
   0   7   7   44.09    3.01 
  -7   7   7   41.87    2.72 
   8  -1  -7   -0.63    1.28 
  -1  -7  -7   -0.06    0.82 
  -8   1  -7   -0.06    0.76 
   7  -8  -7    0.63    1.13 
  -7   8  -7    0.02    0.92 
   1   7  -7    1.30    0.85 
   1   7  -7    0.23    0.86 
   8  -1   7    1.03    0.93 
  -7   8   7    0.10    0.94 
   1   7   7   -0.14    1.09 
  -1  -7   7   -0.31    0.96 
  -8   1   7    1.99    1.14 
   2   6  -7   19.98    2.23 
   8  -2  -7   20.55    2.56 
   6  -8  -7   24.11    2.61 
  -2  -6  -7   24.00    2.30 
  -8   2  -7   17.59    2.08 
   2   6  -7   20.06    2.23 
  -6   8  -7   24.59    2.61 
   8  -2   7   21.32    2.18 
  -8   2   7   23.82    2.37 
  -6   8   7   20.18    2.21 
   2   6   7   28.40    2.74 
  -2  -6   7   24.49    2.39 
  -3  -5  -7   25.27    2.45 
   8  -3  -7   31.21    3.00 
  -5   8  -7   30.17    1.92 
   3   5  -7   26.54    2.50 
   5  -8  -7   27.78    2.06 
  -5   8  -7   28.40    2.71 
  -8   3  -7   24.15    2.39 
   3   5  -7   29.80    2.58 
   5  -8  -7   24.26    2.68 
  -8   3   7   29.04    2.22 
   3   5   7   27.87    2.62 
  -3  -5   7   28.21    2.65 
   8  -3   7   28.57    2.15 
  -8   3   7   27.34    1.95 
  -5   8   7   29.77    2.62 
   8  -4  -7    0.80    0.94 
  -4   8  -7    1.12    0.77 
   4  -8  -7    0.10    0.76 
   4  -8  -7   -1.42    0.93 
  -8   4  -7   -0.02    0.84 
   4   4  -7   -0.04    0.80 
   4   4  -7    1.50    1.08 
  -4   8  -7   -0.62    0.90 
  -4  -4  -7   -1.43    0.63 
  -8   4   7   -0.23    0.70 
   8  -4   7    0.85    0.79 
  -4   8   7   -0.23    0.97 
  -8   4   7    1.03    0.89 
  -4  -4   7    0.44    0.89 
  -4   8   7   -0.19    0.70 
   4   4   7    1.47    0.95 
  -5  -3  -7   37.62    2.44 
  -8   5  -7   40.40    2.69 
  -3   8  -7   41.54    2.46 
   5   3  -7   38.72    2.45 
   5   3  -7   40.53    2.84 
   8  -5  -7   41.32    2.93 
   3  -8  -7   38.64    2.46 
  -5  -3  -7   40.03    2.35 
  -3   8  -7   42.04    2.97 
  -3   8   7   42.96    2.63 
  -5  -3   7   40.42    2.80 
   5   3   7   37.55    2.58 
  -8   5   7   46.09    2.67 
   3  -8   7   42.70    2.89 
  -8   5   7   44.07    2.39 
  -3   8   7   39.04    3.07 
   6   2  -7   23.25    2.17 
  -6  -2  -7   24.96    2.14 
  -6  -2  -7   24.38    2.22 
   2  -8  -7   24.97    2.44 
   6   2  -7   21.94    2.38 
  -8   6  -7   28.77    2.77 
   8  -6  -7   27.59    2.79 
  -2   8  -7   23.64    2.22 
   2  -8   7   27.09    2.70 
  -2   8   7   27.07    2.31 
   6   2   7   24.20    2.39 
  -8   6   7   28.78    2.61 
  -6  -2   7   25.48    2.60 
  -2   8   7   23.13    2.59 
   7   1  -7    0.17    1.19 
   8  -7  -7    0.54    1.03 
  -7  -1  -7   -0.43    0.82 
   1  -8  -7    1.09    0.94 
  -1   8  -7   -0.40    0.77 
  -8   7  -7   -0.40    0.92 
   7   1  -7    0.34    0.74 
  -1   8   7   -0.63    0.86 
   7   1   7    0.03    0.90 
  -8   7   7   -0.03    0.86 
   1  -8   7    0.36    1.06 
  -1   8   7    0.23    0.77 
  -7  -1   7   -1.07    0.66 
   8   0  -7   30.38    3.12 
   0   8  -7   35.31    2.64 
  -8   0  -7   32.21    2.85 
   8  -8  -7   34.45    3.43 
   0  -8  -7   31.96    2.88 
  -8   8  -7   36.05    3.20 
   8   0   7   34.30    2.59 
  -8   0   7   31.02    2.93 
   0  -8   7   32.57    2.95 
  -8   8   7   37.78    3.27 
   0   8   7   25.30    2.74 
   8  -9  -7   44.80    3.96 
   1   8  -7   40.62    2.85 
  -1  -8  -7   40.56    3.05 
  -9   1  -7   41.12    2.92 
  -8   9  -7   42.63    3.20 
   1   8  -7   49.45    3.64 
   9  -1  -7   39.19    3.61 
   9  -1   7   47.76    3.10 
  -9   1   7   41.81    2.99 
   1   8   7   54.88    3.70 
  -1  -8   7   47.53    3.19 
  -8   9   7   52.76    3.40 
  -2  -7  -7   33.32    3.00 
  -7   9  -7   32.68    3.13 
  -9   2  -7   37.82    2.83 
   2   7  -7   32.13    2.95 
   9  -2  -7   33.40    3.37 
   2   7  -7   36.34    2.71 
   7  -9  -7   36.20    3.47 
  -9   2   7   31.84    2.89 
  -2  -7   7   31.59    3.04 
   9  -2   7   35.54    2.65 
   2   7   7   26.33    2.78 
  -7   9   7   28.26    2.66 
   3   6  -7   -0.48    0.92 
   3   6  -7   -0.27    0.88 
   6  -9  -7   -0.41    0.93 
   9  -3  -7    0.16    1.20 
  -6   9  -7   -0.03    1.02 
  -3  -6  -7   -0.22    0.91 
  -9   3  -7   -1.18    0.85 
   9  -3   7   -0.64    0.93 
  -3  -6   7   -0.44    0.96 
  -6   9   7   -1.31    0.80 
   3   6   7   -0.67    0.88 
  -9   3   7    0.86    0.87 
   5  -9  -7   32.78    2.38 
   4   5  -7   30.55    2.92 
  -4  -5  -7   31.84    2.73 
  -5   9  -7   32.43    3.11 
   4   5  -7   37.39    2.63 
   5  -9  -7   32.95    3.32 
   9  -4  -7   34.45    3.28 
  -9   4  -7   25.88    2.63 
  -9   4   7   30.58    2.72 
  -9   4   7   27.69    2.36 
   9  -4   7   33.48    2.51 
   4   5   7   30.42    2.83 
  -5   9   7   31.34    2.70 
  -4  -5   7   34.65    3.00 
   4  -9  -7   50.82    2.91 
  -4   9  -7   56.89    3.55 
   9  -5  -7   50.36    3.41 
  -5  -4  -7   57.92    3.03 
  -4   9  -7   51.43    2.81 
   5   4  -7   45.16    2.83 
   5   4  -7   56.53    3.49 
  -9   5  -7   54.76    3.40 
   5   4   7   53.98    3.30 
  -4   9   7   54.59    3.10 
  -9   5   7   53.58    2.98 
  -5  -4   7   52.78    3.19 
  -4   9   7   55.17    3.76 
  -9   5   7   60.29    3.09 
  -6  -3  -7    0.63    0.90 
   6   3  -7    1.57    1.02 
   3  -9  -7   -0.35    0.77 
  -3   9  -7    0.59    0.87 
  -9   6  -7   -0.70    0.70 
   6   3  -7    1.71    1.20 
   9  -6  -7    0.86    1.22 
  -9   6   7    1.84    1.02 
  -6  -3   7    1.71    1.10 
  -3   9   7    0.70    0.99 
   3  -9   7    2.37    1.17 
   6   3   7    1.06    1.09 
  -3   9   7   -0.22    1.10 
  -9   7  -7   49.22    3.30 
   9  -7  -7   45.04    3.43 
   2  -9  -7   49.47    3.04 
   7   2  -7   50.70    2.84 
  -2   9  -7   41.02    2.75 
  -7  -2  -7   52.14    2.98 
  -7  -2  -7   44.75    2.86 
   7   2  -7   41.42    3.17 
  -7  -2   7   45.11    3.17 
  -9   7   7   44.11    3.00 
  -2   9   7   42.55    2.67 
  -2   9   7   50.58    3.55 
   7   2   7   44.70    3.05 
   2  -9   7   44.57    3.12 
   1  -9  -7   41.41    2.97 
  -8  -1  -7   44.08    2.93 
   8   1  -7   46.19    3.46 
   9  -8  -7   41.29    3.80 
  -1   9  -7   40.95    2.89 
  -9   8  -7   38.59    3.49 
  -9   8   7   42.39    3.07 
   8   1   7   40.02    2.97 
  -8  -1   7   39.66    2.90 
   1  -9   7   42.16    3.10 
  -1   9   7   43.87    3.40 
  -9   0  -7   -1.51    0.87 
   0   9  -7   -0.91    0.85 
  -9   9  -7    1.60    1.20 
   9  -9  -7   -1.28    1.15 
   0  -9  -7    0.67    1.05 
   9   0  -7    2.05    1.53 
   0   9   7   -0.93    1.07 
   0  -9   7    0.31    1.17 
  -9   0   7    0.38    0.97 
   9   0   7   -1.98    1.01 
  -9   9   7    0.54    1.18 
  10  -1  -7   18.89    3.06 
  -1  -9  -7   15.42    2.35 
   1   9  -7   20.23    2.55 
   9 -10  -7   24.09    3.10 
  -9  10  -7   18.20    2.67 
 -10   1  -7   17.23    2.37 
   1   9   7   18.35    2.70 
  -1  -9   7   18.82    2.47 
 -10   1   7   20.75    2.64 
  10  -1   7   17.48    2.47 
  -9  10   7   17.38    2.48 
   2   8  -7    0.23    1.25 
  -8  10  -7    1.80    1.27 
   8 -10  -7    0.56    1.38 
   2   8  -7    0.69    1.04 
  -2  -8  -7    1.16    1.19 
  10  -2  -7    1.58    1.50 
 -10   2  -7    2.24    1.22 
   2   8   7    2.42    1.45 
  -2  -8   7    1.53    1.33 
 -10   2   7    0.34    1.14 
  10  -2   7   -0.22    1.19 
  -8  10   7    2.39    1.28 
   3   7  -7   33.82    3.08 
   7 -10  -7   37.69    3.78 
  10  -3  -7   34.48    3.60 
   3   7  -7   32.97    3.15 
  -7  10  -7   30.69    3.14 
 -10   3  -7   28.68    2.91 
  -3  -7  -7   30.04    2.98 
 -10   3   7   34.80    3.19 
  -3  -7   7   34.71    3.25 
   3   7   7   35.46    3.37 
  10  -3   7   32.70    3.08 
  -7  10   7   33.76    3.11 
   4   6  -7   26.19    2.62 
   6 -10  -7   31.69    3.50 
 -10   4  -7   22.92    2.59 
  -4  -6  -7   28.00    2.69 
  -6  10  -7   24.74    2.88 
   4   6  -7   26.86    2.91 
  10  -4  -7   29.42    3.24 
   4   6   7   23.99    2.73 
 -10   4   7   34.14    2.97 
  -4  -6   7   28.80    2.87 
  -6  10   7   27.10    2.69 
  -5  10  -7   -0.61    0.98 
 -10   5  -7    0.59    1.22 
   5 -10  -7   -0.90    0.97 
   5   5  -7   -0.68    1.09 
  -5  -5  -7   -1.00    0.78 
  10  -5  -7   -0.43    1.01 
   5 -10  -7    1.09    1.03 
   5   5  -7    0.14    0.98 
  -5  -5   7    0.91    1.09 
   5   5   7   -1.13    1.08 
 -10   5   7   -0.45    0.99 
  -5  10   7    1.72    1.12 
   6   4  -7   32.66    3.31 
   6   4  -7   29.84    2.75 
  -6  -4  -7   32.16    2.80 
  10  -6  -7   28.58    3.15 
  -4  10  -7   35.71    2.46 
 -10   6  -7   34.37    3.27 
   4 -10  -7   27.79    2.59 
   4 -10   7   26.34    2.87 
  -6  -4   7   27.18    2.79 
   6   4   7   28.91    3.03 
 -10   6   7   27.66    2.68 
  -4  10   7   29.37    2.82 
  -4  10   7   28.46    3.39 
  -7  -3  -7   28.22    2.54 
 -10   7  -7   30.47    3.10 
   7   3  -7   23.44    2.97 
  -3  10  -7   25.76    2.50 
   7   3  -7   26.60    2.56 
   3 -10  -7   24.22    2.54 
  10  -7  -7   22.50    2.88 
  -3  10   7   27.82    3.40 
  -3  10   7   27.60    2.64 
 -10   7   7   23.73    2.63 
   7   3   7   24.51    2.71 
   3 -10   7   26.88    2.84 
  -7  -3   7   25.60    2.88 
 -10   8  -7    1.40    1.22 
   2 -10  -7   -0.18    1.01 
  -2  10  -7    0.53    1.06 
   8   2  -7    1.22    1.23 
  -8  -2  -7   -0.04    1.05 
  10  -8  -7    1.74    1.40 
  -8  -2   7   -0.14    1.14 
   2 -10   7   -0.07    1.07 
 -10   8   7    3.15    1.38 
   8   2   7    1.13    1.24 
  -2  10   7   -0.54    1.30 
  -9  -1  -7   31.16    3.13 
 -10   9  -7   32.03    3.38 
   1 -10  -7   29.02    2.93 
  10  -9  -7   33.02    3.57 
  -1  10  -7   32.55    3.10 
   9   1  -7   28.21    3.25 
  -1  10   7   28.34    3.34 
 -10   9   7   24.14    2.86 
   9   1   7   39.82    3.61 
   1 -10   7   29.17    3.04 
  -9  -1   7   28.29    3.05 
  10   0  -7   17.54    2.93 
  10 -10  -7   12.11    2.39 
 -10   0  -7   14.66    2.38 
   0 -10  -7   14.51    2.22 
 -10  10  -7   12.56    2.37 
   0  10  -7   10.97    2.04 
 -10  10   7   12.78    2.32 
  10   0   7   18.57    2.70 
 -10   0   7   16.70    2.58 
   0  10   7   11.59    2.41 
  11  -1  -7    0.35    1.76 
 -11   1  -7   -1.20    1.15 
 -10  11  -7   -2.18    1.13 
  11  -1   7    0.28    1.42 
   9 -11  -7   18.57    3.00 
  11  -2  -7   22.76    3.25 
  -9  11  -7   22.13    3.03 
   2   9  -7   27.50    3.01 
  -2  -9  -7   25.07    2.98 
 -11   2  -7   16.81    2.51 
   2   9   7   19.49    3.00 
  -2  -9   7   20.94    2.75 
  11  -2   7   20.72    2.80 
 -11   2   7   25.20    3.10 
  -9  11   7   23.75    2.88 
  -8  11  -7   25.68    2.99 
 -11   3  -7   29.18    3.18 
   8 -11  -7   34.19    3.71 
  -3  -8  -7   31.25    3.26 
  11  -3  -7   26.62    3.49 
   3   8  -7   29.75    3.01 
  -8  11   7   29.03    3.14 
   3   8   7   34.65    3.62 
  -3  -8   7   31.12    3.27 
 -11   3   7   32.86    3.34 
   4   7  -7    1.70    1.28 
  11  -4  -7    0.04    1.42 
   4   7  -7    3.28    1.53 
 -11   4  -7    1.11    1.24 
   7 -11  -7    2.26    1.49 
  -7  11  -7   -0.97    1.10 
  -4  -7  -7    0.32    1.16 
 -11   4   7    0.62    1.26 
  -4  -7   7   -0.80    0.97 
  -7  11   7    1.50    1.21 
   4   7   7    1.25    1.24 
   5   6  -7   36.39    3.66 
  -6  11  -7   31.01    3.24 
   6 -11  -7   33.62    3.67 
  11  -5  -7   38.69    3.78 
   5   6  -7   30.38    3.00 
  -5  -6  -7   34.05    3.15 
 -11   5  -7   32.93    3.42 
  -5  -6   7   29.08    3.06 
   5   6   7   33.46    3.46 
  -6  11   7   34.73    3.28 
 -11   5   7   31.07    3.03 
   6   5  -7   20.98    2.49 
  -6  -5  -7   20.22    2.41 
   5 -11  -7   21.13    2.84 
 -11   6  -7   22.02    2.79 
  11  -6  -7   24.33    3.21 
   6   5  -7   19.63    2.75 
  -5  11   7   22.32    2.65 
   6   5   7   18.05    2.48 
  -6  -5   7   25.13    2.91 
  11  -7  -7   -0.37    1.27 
 -11   7  -7   -1.13    1.07 
  -7  -4  -7   -0.44    0.98 
   7   4  -7   -0.74    1.17 
   4 -11  -7   -0.87    1.08 
  -4  11  -7    0.11    1.05 
   7   4  -7   -1.90    0.85 
   7   4   7    0.80    1.40 
  -4  11   7   -0.05    1.45 
  -4  11   7    0.36    1.08 
  -7  -4   7   -0.30    1.19 
 -11   7   7    0.63    1.13 
   3 -11  -7   28.14    2.95 
   8   3  -7   21.59    3.11 
  11  -8  -7   24.86    3.28 
  -3  11  -7   21.93    2.54 
 -11   8  -7   24.85    3.03 
 -11   8   7   18.36    2.46 
  -3  11   7   21.59    3.37 
   8   3   7   23.48    2.94 
  -8  -3   7   18.03    2.47 
 -11   9  -7   30.11    3.34 
  -2  11  -7   29.55    2.98 
   2 -11  -7   27.98    3.00 
  -9  -2  -7   25.89    2.98 
   9   2  -7   21.87    3.02 
  11  -9  -7   28.19    3.48 
  -2  11   7   26.24    3.59 
  -9  -2   7   26.89    3.05 
 -11   9   7   28.20    3.07 
   9   2   7   24.92    2.98 
 -10  -1  -7    0.99    1.40 
  10   1  -7    0.32    1.40 
 -11  10  -7    1.75    1.61 
  -1  11  -7    0.82    1.08 
  10   1   7   -0.77    1.28 
  -3  -9   7    1.07    1.41 
 -12   4   7   14.50    2.55 
  -4  -8   7   12.00    2.27 
   5   7  -7   23.47    2.77 
   5   7  -7   23.75    3.10 
  -5  -7  -7   29.71    3.15 
  12  -5  -7   19.61    3.14 
 -12   5   7   26.00    3.05 
   5   7   7   23.14    3.16 
  -7  12   7   28.37    3.20 
  -5  -7   7   25.41    2.93 
  -6  -6  -7    0.38    1.29 
  12  -6  -7   -0.40    1.41 
   6   6  -7   -0.03    1.36 
   6   6  -7    0.33    1.09 
   6   6   7    0.03    1.47 
  -6  -6   7    0.66    1.52 
  -6  12   7    0.30    1.20 
   7   5  -7   12.49    2.19 
 -12   7  -7   18.58    3.12 
   7   5  -7   23.26    3.20 
  -7  -5  -7   22.04    2.67 
   7   5   7   22.91    3.02 
  -7  -5   7   16.73    2.56 
  -5  12   7   17.56    2.56 
   8   4  -7   16.35    2.89 
   4 -12  -7   23.39    2.82 
   8   4   7   17.73    2.91 
 -12   8   7   20.32    2.70 
   3 -12   7    1.80    1.51 
   0   0  -8   37.64    1.15 
   0   0  -8   35.41    1.81 
   0   0  -8   35.67    2.02 
   0   0   8   35.86    2.05 
   1   0  -8   16.56    1.67 
  -1   1  -8   17.25    1.61 
   1  -1  -8   18.26    1.06 
  -1   1  -8   21.23    1.59 
   0  -1  -8   18.14    1.68 
   0   1  -8   13.94    1.43 
   0   1  -8   17.88    1.60 
   1  -1  -8   16.41    1.68 
  -1   0  -8   17.65    1.63 
  -1   0  -8   18.29    1.36 
   0  -1  -8   17.53    1.24 
   1   0  -8   17.74    0.94 
   0   1   8   17.42    1.66 
  -1   0   8   15.03    1.46 
  -1   1   8   15.52    1.54 
   0   1   8   17.18    1.02 
  -1   0   8   18.90    1.38 
   1   0   8   18.21    0.83 
  -1   1   8   15.40    1.18 
  -1   2  -8   94.86    3.24 
  -1  -1  -8  101.02    2.95 
   1  -2  -8  105.91    3.01 
  -2   1  -8   96.08    3.28 
  -1   2  -8   97.30    3.45 
   1   1  -8   98.59    2.53 
  -2   1  -8   93.13    3.19 
   2  -1  -8  101.09    3.44 
   1   1  -8   99.05    3.32 
  -1  -1  -8   98.77    3.28 
   1  -2  -8  100.57    3.45 
   2  -1  -8   98.44    2.89 
   1   1   8  102.82    2.70 
  -1  -1   8   99.27    3.24 
  -1   2   8   91.17    3.32 
  -1   2   8   97.38    2.75 
   1   1   8   99.07    3.51 
   2  -1   8  101.10    2.11 
  -1  -1   8  100.18    3.39 
  -2   1   8  103.34    3.09 
  -2   1   8  102.40    3.32 
   0   2  -8   11.46    0.57 
   0   2  -8   10.55    1.24 
   2   0  -8   10.51    1.31 
  -2   0  -8    9.06    1.07 
   0  -2  -8   11.83    1.00 
   2  -2  -8    9.48    1.26 
  -2   2  -8    8.91    1.28 
   2   0  -8   10.25    1.07 
  -2   0  -8    9.84    1.24 
   2  -2  -8   11.15    1.10 
   0  -2  -8   10.00    1.21 
  -2   2  -8   11.09    1.27 
  -2   0   8   10.25    1.19 
  -2   0   8    8.92    1.11 
  -2   2   8   12.08    1.09 
  -2   2   8   13.42    1.47 
   0   2   8    8.17    1.19 
   2   0   8   10.90    0.78 
   0  -2   8   10.45    1.33 
   0   2   8   11.18    1.08 
   2  -3  -8   14.64    1.39 
  -3   1  -8   12.47    1.42 
  -1  -2  -8   14.12    1.44 
   2  -3  -8   11.66    1.35 
  -2   3  -8   10.53    1.23 
   3  -1  -8   11.04    1.36 
  -1  -2  -8   11.10    1.01 
   1   2  -8   14.37    1.51 
  -2   3  -8   17.62    1.79 
   3  -1  -8   14.53    1.39 
   1   2  -8   13.51    0.95 
  -3   1  -8   13.60    1.43 
  -3   1   8   12.90    1.30 
  -1  -2   8   13.46    1.31 
  -3   1   8   13.08    1.31 
   3  -1   8   13.24    0.84 
  -1  -2   8   13.70    1.63 
   1   2   8   13.01    1.54 
  -2   3   8   10.73    1.35 
  -2   3   8   13.08    0.86 
   1   2   8   12.08    1.20 
   3  -2  -8   63.98    2.52 
  -1   3  -8   60.56    2.87 
  -1   3  -8   68.25    1.58 
  -2  -1  -8   68.63    2.39 
   2   1  -8   68.13    2.29 
  -2  -1  -8   65.50    2.62 
  -3   2  -8   70.75    2.80 
   1  -3  -8   69.67    2.71 
   3  -2  -8   70.56    2.80 
  -3   2  -8   64.28    2.60 
  -1   3  -8   65.40    2.63 
   2   1  -8   67.78    2.71 
  -1   3   8   69.29    2.62 
  -1   3   8   62.63    2.75 
  -3   2   8   64.28    2.32 
   3  -2   8   70.03    1.71 
  -3   2   8   71.38    2.72 
   2   1   8   67.19    2.24 
  -2  -1   8   72.02    2.58 
  -1   3   8   71.36    1.95 
  -2  -1   8   66.47    2.77 
  -3   3  -8   58.19    2.37 
   3  -3  -8   58.30    2.45 
   3  -3  -8   57.06    2.66 
   3   0  -8   55.36    2.24 
   0  -3  -8   57.85    1.79 
  -3   3  -8   55.94    2.60 
   0   3  -8   62.33    2.59 
   3   0  -8   57.02    2.52 
  -3   0  -8   56.45    2.37 
  -3   0  -8   58.19    2.36 
   0  -3  -8   54.86    2.42 
   0   3  -8   59.73    1.80 
  -3   3   8   59.46    1.98 
   0  -3   8   50.97    2.70 
  -3   0   8   53.16    2.41 
   3   0   8   57.67    2.01 
  -3   0   8   57.06    2.26 
  -3   3   8   58.26    2.54 
   0   3   8   54.40    2.31 
   0   3   8   56.76    2.65 
  -3   4  -8    4.89    1.19 
  -3   4  -8    3.21    0.76 
  -4   1  -8    6.64    1.06 
  -1  -3  -8    6.53    0.75 
   4  -1  -8    5.89    1.06 
  -1  -3  -8    4.57    1.00 
  -4   1  -8    5.92    1.08 
   1   3  -8    6.15    0.83 
   1   3  -8    7.13    1.16 
   3  -4  -8    5.10    0.99 
   3  -4  -8    5.21    1.02 
   4  -1  -8    5.28    1.02 
   1   3   8    5.73    1.19 
   1   3   8    5.91    0.99 
  -4   1   8    6.30    0.98 
  -3   4   8    5.13    0.60 
  -4   1   8    5.98    0.94 
  -1  -3   8    4.42    1.09 
   4  -1   8    5.54    0.79 
  -3   4   8    5.55    1.06 
  -2  -2  -8   64.24    2.21 
  -2   4  -8   60.55    2.89 
   4  -2  -8   56.86    2.55 
   2   2  -8   61.42    2.30 
  -2  -2  -8   61.62    2.60 
   2   2  -8   58.22    2.55 
  -4   2  -8   63.01    2.70 
  -4   2  -8   58.66    2.45 
   4  -2  -8   58.38    2.57 
  -2   4  -8   56.03    2.44 
   2  -4  -8   61.59    2.64 
  -4   2   8   59.82    2.51 
   2   2   8   51.49    2.64 
  -2   4   8   63.37    2.69 
  -2   4   8   59.47    2.69 
  -2  -2   8   58.53    2.74 
   4  -2   8   60.40    1.92 
  -4   2   8   64.50    2.42 
  -2  -2   8   57.46    2.21 
   2   2   8   57.69    2.32 
   1  -4  -8   15.51    1.55 
   4  -3  -8   19.48    1.75 
  -3  -1  -8   19.27    1.36 
  -4   3  -8   18.54    1.56 
  -4   3  -8   18.78    1.88 
   3   1  -8   22.25    1.92 
  -1   4  -8   20.27    1.07 
  -1   4  -8   20.38    1.78 
   3   1  -8   18.41    1.61 
  -1   4  -8   22.43    2.21 
   4  -3  -8   15.45    1.62 
  -3  -1  -8   23.35    1.59 
  -1   4   8   18.93    1.74 
  -3  -1   8   14.98    1.63 
  -4   3   8   17.58    1.60 
   3   1   8   20.53    1.37 
  -4   3   8   17.77    1.24 
  -3  -1   8   19.13    1.26 
  -1   4   8   21.16    1.86 
  -4   0  -8    3.94    0.94 
  -4   4  -8    4.11    0.85 
   4  -4  -8    3.94    1.00 
   4   0  -8    3.35    0.92 
   0   4  -8    5.24    0.79 
   4   0  -8    3.71    0.89 
   0  -4  -8    5.74    1.04 
   4  -4  -8    4.07    1.03 
   0   4  -8    6.58    1.18 
  -4   0  -8    2.99    0.78 
  -4   4  -8    3.91    1.02 
   4   0   8    4.59    0.82 
  -4   4   8    4.47    0.97 
   0   4   8    3.37    0.98 
   0  -4   8    2.89    1.02 
  -4   4   8    4.46    0.68 
   0   4   8    3.12    0.90 
  -4   0   8    2.55    0.83 
  -4   0   8    4.34    0.79 
  -4   5  -8   67.75    3.28 
  -1  -4  -8   61.03    2.83 
   1   4  -8   66.09    2.57 
  -4   5  -8   66.57    2.56 
   4  -5  -8   64.15    2.78 
  -5   1  -8   63.45    2.61 
   4  -5  -8   67.85    3.16 
   5  -1  -8   67.27    2.99 
  -5   1  -8   70.29    3.00 
   1   4  -8   69.32    2.98 
   5  -1  -8   69.46    2.73 
  -1  -4   8   65.88    3.24 
   5  -1   8   67.31    2.54 
   1   4   8   69.01    3.02 
   1   4   8   68.78    2.95 
  -5   1   8   67.49    2.54 
  -5   1   8   66.38    2.89 
  -4   5   8   67.30    2.99 
  -5   2  -8   22.13    1.59 
  -2  -3  -8   25.25    1.38 
   3  -5  -8   24.69    1.77 
   5  -2  -8   25.09    1.93 
   2   3  -8   24.80    1.85 
   2   3  -8   24.33    1.62 
   5  -2  -8   22.39    1.65 
   3  -5  -8   26.94    2.01 
  -5   2  -8   25.88    2.23 
  -2  -3  -8   24.55    1.82 
  -3   5  -8   24.06    1.60 
  -3   5  -8   23.16    2.22 
  -2  -3   8   19.22    1.94 
  -5   2   8   26.33    1.70 
  -3   5   8   19.76    1.82 
   5  -2   8   24.18    1.44 
   2   3   8   21.43    1.69 
   2   3   8   21.45    2.00 
  -5   2   8   26.05    1.63 
  -5   3  -8   13.11    1.33 
   2  -5  -8   11.07    1.38 
   3   2  -8   13.93    1.55 
  -2   5  -8   11.15    1.76 
   3   2  -8   12.35    1.38 
  -2   5  -8   13.71    1.50 
  -5   3  -8   12.51    1.55 
   5  -3  -8   11.59    1.50 
  -3  -2  -8   10.95    1.36 
   5  -3  -8   12.22    1.42 
  -3  -2  -8   13.46    1.31 
  -2   5   8   14.08    1.73 
  -5   3   8   13.77    1.51 
   3   2   8    8.60    1.38 
  -2   5   8   11.01    1.44 
  -5   3   8   12.37    1.32 
   3   2   8   11.97    1.31 
  -3  -2   8   14.04    1.72 
   5  -4  -8   71.78    2.97 
   1  -5  -8   71.26    3.01 
  -4  -1  -8   76.37    2.89 
   5  -4  -8   75.09    3.26 
  -5   4  -8   71.44    3.18 
  -4  -1  -8   65.39    2.68 
  -5   4  -8   75.77    2.65 
  -1   5  -8   68.95    2.94 
   4   1  -8   64.11    2.82 
   4   1  -8   69.61    3.01 
  -1   5   8   68.18    3.11 
  -5   4   8   67.76    2.42 
   4   1   8   68.75    2.76 
  -5   4   8   71.54    3.01 
  -4  -1   8   72.12    3.18 
  -1   5   8   69.10    3.04 
   1  -5   8   67.85    3.32 
  -5   0  -8   26.67    1.79 
   0   5  -8   31.65    1.78 
  -5   5  -8   29.57    2.23 
   5  -5  -8   27.30    2.00 
   5  -5  -8   24.60    2.29 
  -5   5  -8   30.48    1.67 
   5   0  -8   29.29    2.11 
   5   0  -8   30.85    1.93 
  -5   0  -8   27.66    1.84 
   0   5  -8   27.09    1.99 
   0  -5  -8   27.00    1.99 
   0  -5   8   26.76    2.49 
   0   5   8   28.22    2.02 
   0   5   8   31.33    2.16 
   5   0   8   29.20    1.81 
  -5   5   8   34.81    2.24 
  -5   0   8   30.43    2.14 
   5  -6  -8   31.58    2.10 
  -6   1  -8   36.39    2.29 
   6  -1  -8   31.09    1.93 
  -5   6  -8   30.24    1.80 
   6  -1  -8   31.98    2.43 
   1   5  -8   33.11    2.22 
  -6   1  -8   35.72    1.95 
  -5   6  -8   32.72    2.42 
   5  -6  -8   35.81    2.56 
   1   5  -8   31.98    2.02 
  -1  -5  -8   32.31    2.20 
   1   5   8   31.71    2.11 
   1   5   8   34.63    2.40 
  -5   6   8   31.28    2.26 
  -1  -5   8   31.89    2.41 
  -6   1   8   31.57    2.26 
   6  -1   8   29.64    1.95 
   6  -2  -8   18.10    2.03 
  -4   6  -8   10.84    1.68 
   6  -2  -8   15.81    1.55 
  -2  -4  -8   15.95    1.78 
   4  -6  -8   17.78    1.76 
   4  -6  -8   16.53    2.01 
  -4   6  -8   15.30    1.50 
   2   4  -8   18.73    1.90 
   2   4  -8   15.21    1.67 
  -6   2  -8   16.04    1.82 
  -6   2  -8   18.82    1.70 
   2   4   8   18.06    1.86 
  -4   6   8   12.44    1.65 
   2   4   8   18.23    1.91 
  -6   2   8   18.13    1.88 
   6  -2   8   15.68    1.50 
  -6   2   8   14.66    1.50 
  -2  -4   8   14.95    1.99 
   6  -3  -8   66.69    2.73 
  -6   3  -8   62.37    3.10 
   6  -3  -8   59.55    3.08 
   3   3  -8   62.83    2.86 
   3  -6  -8   66.19    2.92 
  -3   6  -8   65.49    2.72 
  -3  -3  -8   62.78    2.85 
   3   3  -8   63.10    2.91 
  -3   6  -8   69.06    3.48 
  -6   3   8   63.46    2.78 
  -3   6   8   62.63    3.16 
  -6   3   8   63.45    2.70 
  -3  -3   8   63.05    3.18 
   3   3   8   61.49    3.06 
  -3   6   8   59.75    3.00 
   3   3   8   61.37    2.85 
  -2   6  -8   12.78    1.92 
  -6   4  -8   13.73    1.72 
   6  -4  -8   15.87    1.93 
  -4  -2  -8   15.28    1.61 
   4   2  -8   11.66    1.52 
   6  -4  -8   13.75    1.57 
  -4  -2  -8   14.13    1.50 
  -2   6  -8   13.15    1.52 
   2  -6  -8   14.34    1.71 
   4   2  -8   12.55    1.65 
   4   2   8   16.79    1.98 
  -4  -2   8   12.33    1.64 
   4   2   8   13.58    1.61 
  -2   6   8   13.85    1.69 
  -6   4   8   11.19    1.46 
  -6   4   8   13.22    1.39 
  -2   6   8   11.68    1.72 
   5   1  -8    3.09    0.98 
  -5  -1  -8    1.64    0.84 
  -5  -1  -8    2.17    0.83 
  -6   5  -8    2.25    1.07 
  -1   6  -8    3.13    0.96 
   6  -5  -8    5.46    1.11 
   5   1  -8    2.98    1.12 
   1  -6  -8    4.41    1.07 
   6  -5  -8    5.20    1.35 
   1  -6   8    4.38    1.33 
  -1   6   8    4.78    1.15 
  -5  -1   8    1.66    1.01 
   5   1   8    4.68    1.04 
  -6   5   8    4.03    1.11 
  -1   6   8    1.40    0.99 
   0   6  -8   58.67    2.94 
   6  -6  -8   58.42    2.89 
  -6   0  -8   53.63    2.49 
  -6   6  -8   55.01    3.14 
  -6   0  -8   60.83    2.95 
   6   0  -8   58.78    3.57 
   6   0  -8   54.47    2.62 
   0  -6  -8   49.87    2.78 
   6  -6  -8   60.65    3.34 
  -6   0   8   57.29    3.00 
   0   6   8   58.19    2.82 
   6   0   8   55.39    2.72 
   0   6   8   54.56    3.02 
   0  -6   8   59.14    3.38 
   1   6  -8    8.50    1.43 
   7  -1  -8    8.09    1.70 
  -7   1  -8    9.03    1.57 
   7  -1  -8    9.17    1.30 
   6  -7  -8   11.22    1.87 
  -1  -6  -8    8.32    1.44 
  -6   7  -8   10.48    1.76 
   6  -7  -8   10.18    1.52 
  -7   1   8    8.29    1.52 
   7  -1   8    8.13    1.38 
   1   6   8    9.66    1.69 
  -6   7   8    8.29    1.51 
  -1  -6   8   12.45    1.99 
   1   6   8   10.60    1.53 
  -5   7  -8   35.94    2.00 
  -7   2  -8   36.33    2.49 
   7  -2  -8   30.65    1.95 
   5  -7  -8   31.74    2.11 
   5  -7  -8   35.04    2.61 
   2   5  -8   35.40    2.37 
  -2  -5  -8   34.43    2.35 
   2   5  -8   33.14    2.36 
  -5   7  -8   38.58    2.87 
   7  -2  -8   35.06    3.00 
  -5   7   8   29.80    2.25 
   2   5   8   33.61    2.21 
  -2  -5   8   40.58    2.79 
   2   5   8   31.62    2.40 
  -7   2   8   34.32    2.34 
   7  -2   8   32.66    2.14 
   4  -7  -8    1.86    0.88 
  -4   7  -8    2.20    1.21 
   7  -3  -8    2.69    1.25 
   3   4  -8    3.77    1.11 
  -7   3  -8    1.35    0.94 
  -3  -4  -8    3.83    1.11 
  -4   7  -8    3.27    0.91 
   4  -7  -8    2.56    1.18 
   3   4  -8    1.63    0.96 
  -7   3   8    3.47    0.98 
   3   4   8    3.75    1.14 
  -4   7   8    3.65    1.09 
  -7   3   8    2.26    0.96 
  -3  -4   8    0.87    1.08 
   3   4   8    2.70    1.07 
   4   3  -8   32.99    2.27 
   7  -4  -8   35.13    2.67 
  -3   7  -8   35.29    2.17 
  -3   7  -8   34.95    2.69 
   3  -7  -8   33.44    2.34 
  -7   4  -8   41.64    2.67 
   4   3  -8   42.35    2.57 
  -4  -3  -8   31.63    2.17 
  -7   4   8   36.46    2.15 
   4   3   8   35.87    2.47 
  -4  -3   8   36.98    2.54 
   4   3   8   37.20    2.35 
  -3   7   8   33.80    2.33 
  -7   4   8   34.56    2.33 
  -3   7   8   33.24    2.98 
   5   2  -8   32.81    2.41 
  -5  -2  -8   36.50    2.16 
   7  -5  -8   32.07    2.88 
   5   2  -8   33.45    2.25 
  -7   5  -8   33.94    2.91 
   2  -7  -8   33.32    2.31 
  -2   7  -8   31.05    2.16 
  -5  -2  -8   34.99    2.19 
  -7   5   8   30.58    2.29 
  -7   5   8   32.38    1.97 
   5   2   8   35.72    2.54 
  -5  -2   8   32.07    2.46 
  -2   7   8   34.81    2.68 
   5   2   8   30.83    2.29 
  -2   7   8   31.73    2.31 
   2  -7   8   25.24    2.56 
  -1   7  -8    4.23    1.17 
  -6  -1  -8    5.52    1.23 
   7  -6  -8    8.73    1.67 
  -7   6  -8    4.21    1.28 
   6   1  -8    4.62    1.14 
  -6  -1  -8    3.68    1.01 
   1  -7  -8    4.71    1.14 
   6   1  -8    3.98    1.36 
  -1   7   8    2.81    1.11 
   6   1   8    4.81    1.21 
   1  -7   8    3.77    1.26 
  -1   7   8    4.04    1.11 
  -7   6   8    3.29    1.12 
  -6  -1   8    4.63    1.26 
   7   0  -8   11.07    1.99 
   7  -7  -8   10.13    1.81 
   0  -7  -8   12.44    1.80 
   0   7  -8   10.03    1.67 
  -7   7  -8   11.36    1.91 
   7   0  -8   14.12    1.62 
  -7   0  -8   11.29    1.62 
   0   7   8   11.84    1.63 
  -7   0   8   11.80    1.90 
  -7   7   8   12.57    1.88 
   0   7   8   10.48    1.76 
   7   0   8   12.28    1.67 
   0  -7   8   16.30    2.23 
   8  -1  -8   39.92    3.51 
   1   7  -8   39.69    2.75 
   7  -8  -8   38.87    3.49 
  -8   1  -8   37.58    2.64 
  -1  -7  -8   38.95    2.77 
  -7   8  -8   38.52    3.38 
  -1  -7   8   41.01    2.99 
   1   7   8   43.28    2.56 
   8  -1   8   34.48    2.48 
   1   7   8   43.41    3.11 
  -7   8   8   39.10    2.84 
  -8   1   8   39.18    2.84 
   2   6  -8   10.65    1.66 
  -2  -6  -8   13.42    1.86 
  -8   2  -8    9.55    1.71 
   2   6  -8   14.24    1.85 
  -6   8  -8   12.98    2.13 
   6  -8  -8   15.58    2.21 
   8  -2  -8    9.86    2.00 
   8  -2   8   12.53    1.74 
   2   6   8   10.64    1.82 
  -8   2   8   14.38    1.99 
  -2  -6   8   10.64    1.78 
  -6   8   8   10.24    1.73 
   2   6   8   11.29    1.55 
  -5   8  -8    2.39    0.87 
   8  -3  -8    2.33    1.20 
  -5   8  -8    0.75    1.05 
   5  -8  -8    2.09    0.90 
   5  -8  -8   -0.15    1.05 
   3   5  -8    0.68    0.91 
   3   5  -8    1.91    1.00 
  -3  -5  -8    0.85    0.93 
  -8   3  -8    2.95    1.13 
   3   5   8    2.16    1.12 
   3   5   8    1.78    0.93 
  -8   3   8    0.36    0.87 
  -5   8   8    1.55    1.03 
  -3  -5   8    3.36    1.30 
   4  -8  -8   47.83    3.18 
  -8   4  -8   46.45    2.97 
  -4  -4  -8   50.17    2.81 
   4  -8  -8   47.75    2.72 
   4   4  -8   50.96    2.90 
   8  -4  -8   48.09    3.21 
   4   4  -8   47.06    2.96 
  -4   8  -8   48.04    2.59 
  -4   8  -8   49.41    3.29 
   4   4   8   49.56    2.96 
  -8   4   8   50.64    2.75 
  -8   4   8   50.70    2.77 
   4   4   8   48.82    2.75 
  -4  -4   8   53.45    3.20 
  -4   8   8   47.10    2.87 
  -3   8  -8   16.38    2.33 
  -8   5  -8   17.44    2.21 
   5   3  -8   20.23    2.14 
   3  -8  -8   19.31    2.16 
  -5  -3  -8   19.98    2.06 
  -3   8  -8   18.76    1.95 
   5   3  -8   15.01    1.98 
   8  -5  -8   12.33    2.06 
   5   3   8   16.69    1.98 
   3  -8   8   22.20    2.52 
  -8   5   8   19.22    2.10 
  -3   8   8   20.06    2.16 
   5   3   8   18.28    2.06 
  -8   5   8   21.03    2.03 
  -3   8   8   20.14    2.55 
  -5  -3   8   19.71    2.21 
   6   2  -8    8.46    1.65 
   6   2  -8    7.11    1.45 
   2  -8  -8   11.50    1.67 
  -8   6  -8    8.60    1.74 
  -6  -2  -8    6.78    1.41 
  -6  -2  -8    8.92    1.45 
  -2   8  -8   12.12    1.68 
   8  -6  -8   10.16    1.91 
  -2   8   8    6.81    1.43 
   6   2   8    9.52    1.75 
  -6  -2   8    8.38    1.64 
   2  -8   8    8.33    1.71 
  -2   8   8    8.00    1.73 
   6   2   8    8.02    1.54 
  -8   6   8   13.40    1.92 
   7   1  -8   35.01    2.38 
   8  -7  -8   34.60    3.26 
  -8   7  -8   33.83    3.09 
   7   1  -8   29.47    2.97 
  -7  -1  -8   35.17    2.47 
   1  -8  -8   31.78    2.86 
  -1   8  -8   36.56    2.56 
   7   1   8   37.61    2.73 
  -8   7   8   36.01    3.05 
  -7  -1   8   30.64    2.84 
  -1   8   8   30.32    2.56 
  -1   8   8   36.19    3.36 
   1  -8   8   37.73    3.43 
  -8   0  -8   13.66    1.91 
   8  -8  -8   21.17    2.90 
   8   0  -8   12.42    2.29 
   0   8  -8   16.71    2.10 
  -8   8  -8   17.02    2.32 
   0  -8  -8   19.01    2.37 
  -8   8   8   18.94    2.39 
   0   8   8   14.81    2.30 
  -8   0   8   16.21    2.25 
   0  -8   8   16.48    2.30 
   0   8   8   15.92    1.85 
   8   0   8   16.89    2.16 
  -8   9  -8    4.16    1.59 
  -1  -8  -8    4.01    1.44 
   8  -9  -8    4.03    1.69 
  -9   1  -8    3.92    1.27 
   1   8  -8    1.84    1.07 
   9  -1  -8    6.06    2.05 
  -1  -8   8    3.92    1.55 
   1   8   8    4.21    1.55 
   9  -1   8    2.37    1.24 
  -9   1   8    4.33    1.54 
  -8   9   8    3.68    1.46 
   7  -9  -8   12.03    2.30 
   9  -2  -8   10.66    2.15 
  -2  -7  -8   11.31    1.84 
   2   7  -8   12.09    1.88 
  -7   9  -8   10.58    2.13 
  -9   2  -8    9.27    1.73 
   2   7   8   11.73    2.13 
  -9   2   8   11.94    1.95 
  -2  -7   8   13.61    2.14 
  -7   9   8   10.86    1.86 
   3   6  -8   36.32    2.69 
   9  -3  -8   35.56    3.38 
  -9   3  -8   34.56    3.18 
  -6   9  -8   32.15    3.15 
  -3  -6  -8   32.07    2.86 
   3   6  -8   32.89    2.91 
   6  -9  -8   41.07    3.75 
  -3  -6   8   31.81    2.92 
   3   6   8   27.61    2.78 
  -6   9   8   33.44    3.05 
  -9   3   8   35.44    3.05 
  -4  -5  -8    4.51    1.28 
   4   5  -8    6.37    1.58 
  -9   4  -8    4.83    1.50 
   9  -4  -8    3.84    1.50 
   4   5  -8    6.25    1.31 
   5  -9  -8    5.17    1.23 
  -5   9  -8    7.82    1.81 
   5  -9  -8    4.45    1.48 
  -4  -5   8    5.30    1.59 
   4   5   8    4.15    1.40 
  -5   9   8    3.68    1.26 
  -9   4   8    5.87    1.44 
  -4   9  -8    6.30    1.32 
  -5  -4  -8    4.22    1.21 
   9  -5  -8    4.17    1.45 
  -4   9  -8    4.49    1.55 
   5   4  -8    8.04    1.55 
   5   4  -8    3.66    1.41 
  -9   5  -8    6.59    1.61 
   4  -9  -8    2.78    1.08 
  -4   9   8    4.64    1.32 
  -9   5   8    5.12    1.34 
  -4   9   8    6.09    1.65 
   5   4   8    4.49    1.36 
  -9   5   8    4.66    1.30 
  -5  -4   8    4.43    1.45 
   3  -9  -8   35.65    2.63 
   9  -6  -8   37.13    3.53 
  -6  -3  -8   35.86    2.57 
  -3   9  -8   38.57    2.60 
   6   3  -8   39.89    2.65 
  -9   6  -8   40.04    3.00 
   6   3  -8   39.27    2.97 
  -9   6   8   42.86    2.82 
   3  -9   8   33.19    3.12 
  -6  -3   8   39.45    3.46 
  -3   9   8   34.00    3.42 
  -3   9   8   33.41    2.56 
   6   3   8   36.01    2.79 
   7   2  -8    5.69    1.62 
  -7  -2  -8    5.55    1.45 
   7   2  -8    4.71    1.28 
   9  -7  -8    5.95    1.63 
  -9   7  -8    3.44    1.42 
   2  -9  -8    8.13    1.62 
  -2   9  -8    4.41    1.37 
  -2   9   8    7.08    1.48 
   7   2   8    5.05    1.43 
  -9   7   8    5.44    1.47 
   2  -9   8    5.16    1.60 
  -2   9   8    7.32    1.92 
  -7  -2   8    8.37    1.75 
   9  -8  -8   10.59    2.13 
  -9   8  -8   10.08    1.97 
  -8  -1  -8   11.12    1.83 
   1  -9  -8   10.37    1.87 
   8   1  -8   11.62    2.16 
  -1   9  -8   11.41    1.88 
  -1   9   8    9.10    1.76 
  -8  -1   8   13.63    2.23 
   8   1   8    7.97    1.76 
  -1   9   8    7.24    1.89 
   1  -9   8    9.40    1.95 
  -9   8   8   11.00    1.99 
   9   0  -8   32.83    3.59 
   0   9  -8   31.09    3.01 
   0  -9  -8   35.28    3.25 
  -9   9  -8   34.20    3.46 
   9  -9  -8   31.86    3.56 
  -9   0  -8   32.78    3.19 
   0   9   8   30.52    3.46 
  -9   0   8   31.81    3.24 
   0  -9   8   29.86    3.10 
   9   0   8   28.12    2.90 
  -9   9   8   28.49    2.92 
  -9  10  -8    1.84    1.35 
 -10   1  -8    1.36    1.16 
   9 -10  -8    3.45    1.57 
  -1  -9  -8    2.93    1.43 
  10  -1  -8    5.21    2.10 
   1   9  -8    6.13    1.61 
 -10   1   8    4.20    1.60 
  -1  -9   8    4.75    1.69 
   1   9   8    2.58    1.61 
  -9  10   8    2.03    1.42 
   2   8  -8   26.06    2.93 
  -2  -8  -8   24.42    2.69 
   8 -10  -8   22.13    3.06 
 -10   2  -8   23.56    2.84 
  10  -2  -8   24.29    3.32 
  -8  10  -8   19.60    2.79 
  -2  -8   8   34.16    3.41 
   2   8   8   24.74    3.17 
  -8  10   8   24.86    2.84 
 -10   2   8   26.69    2.97 
  10  -3  -8    6.84    2.09 
 -10   3  -8   11.64    2.07 
   7 -10  -8    7.84    2.02 
  -3  -7  -8   11.24    1.97 
  -7  10  -8   11.23    2.13 
   3   7  -8   14.60    2.16 
 -10   3   8   13.24    2.14 
  -7  10   8   13.93    2.14 
  -3  -7   8    9.50    1.92 
   3   7   8   11.50    2.17 
  -4  -6  -8   15.06    2.18 
   6 -10  -8   15.88    2.53 
   4   6  -8   18.26    2.33 
  10  -4  -8   19.60    2.80 
   4   6  -8   21.43    2.64 
 -10   4  -8   15.25    2.31 
  -6  10  -8   15.30    2.39 
   4   6   8   17.85    2.50 
  -6  10   8   20.39    2.64 
 -10   4   8   23.15    2.56 
  -4  -6   8   14.93    2.20 
  -5  10  -8   25.67    2.96 
   5 -10  -8   33.55    3.53 
   5 -10  -8   33.09    2.89 
   5   5  -8   28.22    2.95 
   5   5  -8   31.36    3.00 
  -5  -5  -8   30.85    2.82 
 -10   5  -8   29.72    3.03 
  10  -5  -8   32.02    3.41 
  -5  10   8   30.41    2.95 
  -5  -5   8   34.07    3.15 
 -10   5   8   37.23    3.11 
   5   5   8   28.57    2.99 
   6   4  -8   14.15    2.05 
 -10   6  -8   18.22    2.55 
   4 -10  -8   15.41    2.02 
   6   4  -8   11.72    2.13 
  -4  10  -8   12.11    1.79 
  10  -6  -8   14.41    2.36 
  -6  -4  -8   13.18    1.90 
 -10   6   8   15.21    2.05 
  -6  -4   8   12.29    2.12 
  -4  10   8   15.37    2.69 
  -4  10   8   15.27    2.16 
   4 -10   8   15.13    2.25 
   6   4   8   13.68    2.13 
  -7  -3  -8    7.38    1.69 
  10  -7  -8    6.72    1.83 
  -3  10  -8    7.75    1.67 
   3 -10  -8   11.13    1.93 
   7   3  -8    7.97    1.60 
   7   3  -8    8.21    1.92 
 -10   7  -8    9.68    2.03 
  -3  10   8    7.87    2.13 
 -10   7   8    9.10    1.73 
   7   3   8    7.89    1.81 
  -7  -3   8    6.36    1.76 
   3 -10   8    7.88    1.81 
  -3  10   8    6.79    1.53 
  -2  10  -8   37.79    3.24 
  10  -8  -8   40.02    3.84 
   2 -10  -8   43.83    3.13 
 -10   8  -8   40.76    3.75 
   8   2  -8   40.49    3.81 
   8   2   8   41.93    3.22 
 -10   8   8   37.93    3.31 
   2 -10   8   42.27    3.77 
  -2  10   8   37.63    3.86 
  -8  -2   8   36.76    3.61 
  10  -9  -8    8.95    2.22 
  -9  -1  -8    5.63    1.59 
   1 -10  -8    5.75    1.70 
 -10   9  -8    3.98    1.64 
   9   1  -8    7.93    2.19 
  -1  10  -8    9.40    1.90 
  -9  -1   8    8.29    1.89 
 -10   9   8    7.80    1.82 
   9   1   8    8.78    1.97 
   1 -10   8    7.33    1.86 
  -1  10   8    7.52    2.19 
   0 -10  -8    5.31    1.70 
   0  10  -8    3.75    1.42 
 -10   0  -8    3.24    1.47 
 -10  10  -8    8.20    2.14 
  10 -10  -8    7.54    2.25 
  10   0  -8    3.10    1.75 
 -10   0   8    9.11    2.14 
   0 -10   8    5.58    1.87 
   0  10   8    6.48    2.01 
  10   0   8    8.48    2.06 
 -10  10   8    6.60    1.88 
 -10  11  -8   15.83    2.70 
  -1 -10   8   17.57    2.93 
  11  -2  -8    7.88    2.34 
  -9  11  -8    5.63    2.01 
   9 -11  -8    7.14    2.10 
 -11   2  -8    3.48    1.49 
 -11   2   8    5.29    1.86 
  -2  -9   8    3.06    1.67 
   2   9   8    6.97    2.11 
   3   8  -8    4.46    1.68 
   8 -11  -8    2.70    1.67 
  11  -3  -8    3.95    1.97 
  -3  -8  -8    5.36    1.61 
 -11   3  -8    4.89    1.58 
  -8  11  -8    0.11    1.40 
   3   8   8    0.15    1.26 
 -11   3   8    4.10    1.64 
  -8  11   8    3.35    1.49 
  -3  -8   8    4.32    1.62 
  -7  11  -8   32.55    3.46 
  -4  -7  -8   27.28    2.88 
  11  -4  -8   28.82    3.42 
 -11   4  -8   21.28    2.73 
   4   7  -8   35.34    3.33 
   7 -11  -8   29.96    3.49 
  -7  11   8   34.61    3.48 
  -4  -7   8   27.08    2.97 
   4   7   8   22.22    2.92 
 -11   4   8   31.53    3.22 
 -11   5  -8    0.98    1.44 
   5   6  -8    2.35    1.65 
   5   6  -8    1.14    1.17 
  -6  11  -8    2.62    1.54 
   6 -11  -8    3.69    1.78 
  -5  -6  -8    4.32    1.57 
  11  -5  -8    5.68    1.85 
 -11   5   8    3.40    1.54 
  -6  11   8    4.95    1.57 
   5   6   8    2.42    1.41 
  -5  -6   8    5.31    1.72 
   5 -11  -8    4.26    1.62 
 -11   6  -8    7.16    1.88 
   6   5  -8    6.76    1.63 
  11  -6  -8    3.96    1.84 
  -6  -5  -8    4.73    1.39 
   5 -11  -8    7.47    2.01 
   6   5  -8    6.45    1.91 
  -6  -5   8    5.56    1.82 
   5 -11   8    3.80    1.69 
  -5  11   8    4.28    1.46 
   6   5   8    6.68    1.80 
  11  -7  -8   14.96    2.58 
   4 -11  -8   14.93    2.24 
  -7  -4  -8   14.92    2.10 
  -4  11  -8   18.11    2.30 
   7   4  -8   18.36    2.81 
   7   4  -8   18.43    2.39 
 -11   7  -8   20.02    2.81 
  -7  -4   8   12.79    2.42 
  -4  11   8   16.02    2.31 
 -11   7   8   17.78    2.41 
   7   4   8   18.34    2.56 
  -4  11   8   22.89    3.34 
   4 -11   8   20.43    2.75 
   3 -11  -8    3.44    1.49 
  11  -8  -8    1.68    1.66 
  -3  11  -8    1.75    1.25 
 -11   8  -8    1.44    1.29 
   8   3  -8    3.11    1.79 
  -3  11   8    3.23    1.92 
 -11   8   8    3.74    1.60 
   8   3   8    3.47    1.68 
  -8  -3   8    2.53    1.52 
   9   2  -8    4.22    1.84 
  11  -9  -8    9.25    2.16 
 -11   9  -8    8.24    2.00 
  -2  11  -8    3.52    1.43 
   2 -11  -8    6.65    1.79 
   9   2   8    7.86    2.08 
  -2  11   8    3.84    1.96 
 -11   9   8    5.29    1.79 
 -10  -1  -8   16.90    2.48 
  10   1  -8   13.49    2.71 
  10   1   8   19.03    2.83 
 -12   4   8   10.23    2.32 
  -5  -7  -8    0.10    1.49 
 -12   5   8    3.46    1.64 
   6   6  -8   22.08    2.82 
  -6  -6  -8   19.50    2.67 
  -6  12   8   24.24    2.96 
   6   6   8   17.50    2.81 
   7   5  -8    2.94    1.65 
   7   5  -8    6.47    1.74 
  -7  -5  -8    2.81    1.45 
  -5  12   8    4.25    1.65 
   7   5   8    3.90    1.79 
   4 -12  -8    4.92    1.66 
   8   4  -8    4.40    1.96 
 -12   8   8    2.05    1.50 
   0   0  -9    0.65    0.55 
   0   0  -9    0.03    0.26 
   0   0  -9    0.87    0.61 
   0   0   9   -0.02    0.71 
   0   1  -9   20.13    1.80 
  -1   1  -9   22.40    1.68 
  -1   0  -9   24.90    1.74 
  -1   1  -9   24.06    1.74 
   1  -1  -9   24.42    1.22 
   0  -1  -9   22.78    1.44 
   1   0  -9   22.55    1.71 
   0  -1  -9   24.27    1.16 
  -1   0  -9   23.58    1.56 
   1  -1  -9   25.88    1.85 
   1   0  -9   24.74    1.09 
   0   1  -9   20.41    1.57 
   0  -1  -9   19.69    1.82 
  -1   1   9   22.73    1.48 
  -1   0   9   22.97    1.59 
   0   1   9   23.63    1.78 
  -1   0   9   23.78    1.76 
  -1   1   9   19.04    1.82 
   1   0   9   24.55    0.96 
   1  -2  -9    7.35    1.27 
   1  -2  -9    7.51    0.92 
   1   1  -9    8.87    1.32 
  -2   1  -9    8.35    1.23 
  -1   2  -9    7.88    1.21 
  -1   2  -9    6.14    1.06 
   1   1  -9    8.96    0.78 
  -2   1  -9    9.37    1.29 
   2  -1  -9    8.23    0.94 
   2  -1  -9    8.47    1.28 
  -1  -1  -9    8.59    1.06 
  -1  -1  -9    8.56    1.34 
  -2   1   9    7.96    1.08 
   1   1   9    8.61    1.24 
  -1   2   9    7.57    1.27 
  -1  -1   9    6.88    1.12 
  -1  -1   9    8.43    1.25 
  -2   1   9    9.86    1.31 
  -1   2   9    8.48    0.96 
   1   1   9    9.11    0.88 
   2  -2  -9   80.84    3.22 
  -2   2  -9   77.97    3.23 
   0   2  -9   82.41    3.16 
  -2   2  -9   80.49    3.08 
  -2   0  -9   81.66    3.21 
   2   0  -9   82.48    3.25 
   2   0  -9   84.00    2.52 
   2  -2  -9   82.21    2.76 
   0  -2  -9   88.62    2.63 
  -2   0  -9   84.02    2.92 
   0  -2  -9   79.83    3.09 
  -2   0   9   84.57    3.09 
  -2   2   9   82.48    3.22 
  -2   2   9   82.84    2.66 
   0   2   9   80.02    3.29 
   0   2   9   80.63    2.66 
   2   0   9   83.96    2.23 
   0  -2   9   82.52    3.32 
  -2   0   9   81.75    3.07 
  -2   3  -9   51.10    2.66 
   1   2  -9   47.67    2.44 
  -3   1  -9   41.72    2.19 
   2  -3  -9   48.37    2.52 
   3  -1  -9   43.71    2.04 
  -1  -2  -9   48.79    2.40 
  -1  -2  -9   47.00    1.90 
   2  -3  -9   47.38    2.23 
  -2   3  -9   41.52    2.22 
   1   2  -9   49.89    1.68 
  -3   1  -9   46.00    2.38 
   3  -1  -9   45.58    2.41 
   1   2   9   46.79    2.61 
  -3   1   9   42.83    2.13 
  -3   1   9   47.96    2.27 
  -2   3   9   43.22    2.42 
  -2   3   9   47.36    1.74 
   1   2   9   49.99    2.02 
  -1  -2   9   45.45    2.17 
  -1  -2   9   47.11    2.59 
  -1   3  -9   58.92    2.63 
  -3   2  -9   62.82    2.64 
   2   1  -9   62.04    2.74 
   3  -2  -9   64.55    2.46 
  -3   2  -9   54.21    2.62 
  -2  -1  -9   58.06    2.35 
  -1   3  -9   57.99    2.85 
   3  -2  -9   62.40    2.76 
   1  -3  -9   58.76    2.69 
   2   1  -9   59.61    2.13 
  -2  -1  -9   58.27    2.59 
  -2  -1   9   58.78    2.48 
  -3   2   9   58.23    2.30 
  -1   3   9   54.44    2.40 
  -1   3   9   59.73    2.83 
   2   1   9   54.45    2.07 
  -1   3   9   55.39    1.86 
  -3   2   9   61.70    2.69 
  -2  -1   9   55.55    2.65 
   2   1   9   59.42    2.80 
   0  -3  -9    3.33    0.93 
   0   3  -9    2.22    0.88 
  -3   3  -9    3.01    0.83 
  -3   0  -9    2.46    0.83 
  -3   0  -9    3.52    0.84 
   3  -3  -9    2.68    0.88 
   3  -3  -9    3.28    0.83 
   3   0  -9    3.28    0.77 
   3   0  -9    4.50    1.04 
  -3   3  -9    2.00    0.93 
  -3   0   9    2.43    0.80 
   0  -3   9    4.30    1.10 
  -3   0   9    3.38    0.81 
  -3   3   9    3.06    0.86 
   0   3   9    2.56    0.77 
  -3   3   9    2.46    0.60 
   0   3   9    3.39    1.05 
   3   0   9    3.81    0.64 
   4  -1  -9   28.17    1.85 
   1   3  -9   24.85    1.85 
   3  -4  -9   27.39    2.28 
  -3   4  -9   29.12    2.16 
  -3   4  -9   27.97    1.79 
   3  -4  -9   21.76    1.73 
   4  -1  -9   24.88    1.86 
  -4   1  -9   25.09    1.85 
  -1  -3  -9   23.89    1.76 
  -4   1  -9   25.04    1.81 
  -4   1   9   21.73    1.89 
  -4   1   9   25.83    1.69 
  -3   4   9   25.25    1.91 
   1   3   9   27.40    1.77 
  -1  -3   9   25.62    2.42 
   1   3   9   21.81    2.09 
   4  -2  -9    0.66    0.69 
  -4   2  -9   -0.58    0.62 
   4  -2  -9   -0.34    0.48 
   2  -4  -9   -0.04    0.54 
  -2  -2  -9    0.16    0.58 
  -4   2  -9    0.78    0.68 
   2   2  -9    0.84    0.77 
  -2  -2  -9    0.34    0.51 
   2   2  -9    0.42    0.51 
   2  -4  -9   -0.08    0.65 
  -2   4  -9   -0.13    0.58 
  -2   4  -9   -0.86    0.59 
  -2   4   9    0.39    0.66 
  -4   2   9   -0.15    0.49 
  -4   2   9    1.48    0.71 
  -2  -2   9    0.07    0.67 
  -2  -2   9    0.29    0.56 
   2   2   9   -0.25    0.51 
   2   2   9    1.33    0.96 
   1  -4  -9   27.68    1.92 
  -1   4  -9   25.38    2.32 
  -1   4  -9   24.26    1.80 
   4  -3  -9   23.08    2.05 
  -4   3  -9   22.04    2.03 
   3   1  -9   26.61    1.93 
  -3  -1  -9   26.27    1.63 
   4  -3  -9   26.00    1.81 
  -3  -1  -9   29.12    1.86 
  -4   3  -9   22.65    1.67 
   3   1  -9   27.06    1.77 
  -1   4   9   24.59    1.83 
   3   1   9   24.55    1.56 
  -3  -1   9   23.33    2.09 
  -3  -1   9   26.56    1.64 
  -4   3   9   23.05    1.99 
  -4   3   9   24.88    1.49 
  -1   4   9   26.75    2.04 
  -4   0  -9   31.66    1.94 
  -4   4  -9   32.92    2.24 
   4   0  -9   31.50    2.07 
   0   4  -9   33.18    2.12 
   4   0  -9   34.96    2.00 
   4  -4  -9   34.89    2.16 
  -4   4  -9   34.12    1.97 
   0  -4  -9   33.99    2.17 
   4  -4  -9   31.35    2.21 
  -4   0  -9   37.34    2.09 
  -4   4   9   34.29    2.20 
   0   4   9   34.28    2.31 
   4   0   9   34.58    1.77 
  -4   0   9   35.95    1.88 
   0  -4   9   38.14    2.48 
   0   4   9   40.01    2.22 
  -4   0   9   33.65    2.10 
  -5   1  -9    4.96    1.03 
  -4   5  -9    4.10    1.15 
  -4   5  -9    3.94    0.90 
   4  -5  -9    3.65    1.05 
   5  -1  -9    4.88    1.15 
   5  -1  -9    3.71    1.00 
  -1  -4  -9    4.61    1.13 
   4  -5  -9    6.65    1.33 
   1   4  -9    4.84    1.15 
  -5   1  -9    5.48    1.18 
   1   4   9    1.12    0.87 
  -4   5   9    4.30    1.12 
  -5   1   9    5.09    1.15 
   1   4   9    5.14    1.09 
  -1  -4   9    3.65    1.29 
  -5   1   9    4.49    0.95 
   3  -5  -9   13.88    1.59 
   2   3  -9   17.19    1.55 
  -5   2  -9   16.96    1.69 
  -3   5  -9   14.38    1.51 
   3  -5  -9   16.05    1.83 
  -5   2  -9   15.60    1.80 
   5  -2  -9   19.20    1.88 
   5  -2  -9   15.85    1.79 
  -2  -3  -9   16.83    1.77 
   2   3  -9   12.56    1.53 
  -3   5  -9   14.80    1.99 
  -5   2   9   15.32    1.58 
   2   3   9   12.76    1.67 
   2   3   9   16.31    1.68 
  -3   5   9   14.50    1.74 
  -2  -3   9   10.56    1.61 
  -5   2   9   12.38    1.46 
   2  -5  -9   26.13    2.25 
  -3  -2  -9   22.50    1.97 
   3   2  -9   22.53    1.68 
  -3  -2  -9   26.97    1.62 
  -2   5  -9   26.89    1.95 
  -2   5  -9   26.10    2.46 
   5  -3  -9   26.92    1.93 
   3   2  -9   27.74    2.31 
   5  -3  -9   25.94    2.25 
  -5   3  -9   28.02    1.77 
  -5   3  -9   23.52    2.15 
  -5   3   9   27.47    1.93 
  -3  -2   9   25.28    2.40 
  -2   5   9   24.60    2.18 
   3   2   9   25.97    1.77 
   3   2   9   29.17    2.51 
  -2   5   9   24.08    2.17 
  -5   3   9   23.51    1.67 
   4   1  -9   -0.27    0.79 
   4   1  -9    0.27    0.73 
   5  -4  -9    0.10    0.62 
  -5   4  -9    0.73    0.89 
  -1   5  -9   -0.16    0.72 
  -4  -1  -9    0.33    0.64 
   1  -5  -9   -0.79    0.65 
   5  -4  -9   -0.05    0.71 
  -5   4  -9    0.34    0.58 
  -4  -1  -9    1.17    0.72 
  -5   4   9    0.10    0.50 
   4   1   9   -0.83    0.60 
  -1   5   9   -0.24    0.71 
  -4  -1   9    0.36    0.83 
  -5   4   9    0.16    0.73 
  -1   5   9   -0.59    0.72 
   1  -5   9   -1.30    0.63 
   0   5  -9   42.05    2.52 
  -5   0  -9   42.63    2.31 
   0  -5  -9   39.36    2.40 
  -5   0  -9   43.57    2.46 
  -5   5  -9   42.59    2.14 
   5  -5  -9   46.40    2.73 
   5   0  -9   41.21    2.50 
  -5   5  -9   46.39    2.82 
   5   0  -9   40.16    2.35 
   5  -5  -9   47.05    2.67 
   0   5   9   41.93    2.58 
   0   5   9   44.09    2.62 
   5   0   9   43.59    2.19 
  -5   5   9   41.55    2.53 
   0  -5   9   38.49    2.79 
  -5   0   9   45.21    2.66 
  -6   1  -9   46.73    2.45 
   5  -6  -9   46.18    2.92 
   5  -6  -9   41.77    2.58 
   6  -1  -9   43.52    2.94 
   6  -1  -9   49.86    2.52 
  -5   6  -9   43.35    2.90 
  -5   6  -9   49.07    2.30 
   1   5  -9   48.02    2.69 
  -6   1  -9   42.63    2.59 
  -1  -5  -9   40.23    2.55 
  -1  -5   9   49.25    3.04 
  -5   6   9   43.96    2.70 
   1   5   9   45.47    2.72 
  -6   1   9   43.39    2.63 
   1   5   9   45.64    2.70 
   2   4  -9   21.91    2.13 
  -4   6  -9   24.75    1.78 
   4  -6  -9   19.88    1.97 
   6  -2  -9   24.91    2.31 
  -6   2  -9   24.67    2.01 
   6  -2  -9   22.62    2.02 
  -4   6  -9   18.68    2.20 
  -6   2  -9   21.74    2.20 
  -2  -4  -9   22.44    2.21 
   4  -6  -9   25.52    2.45 
   2   4   9   23.03    2.12 
  -6   2   9   24.31    1.79 
  -4   6   9   20.07    2.11 
  -2  -4   9   19.06    2.18 
   2   4   9   23.68    2.26 
  -6   2   9   22.16    2.07 
   6  -3  -9    0.79    0.87 
   3   3  -9    1.58    0.81 
  -6   3  -9    0.81    0.81 
   6  -3  -9    0.98    0.80 
  -3  -3  -9    1.62    0.95 
  -3   6  -9    3.17    1.25 
   3  -6  -9    1.62    0.91 
   3   3  -9    2.55    1.00 
   3  -6  -9    2.87    0.99 
  -3   6  -9    1.89    0.88 
  -6   3   9    1.10    0.82 
  -3   6   9    2.07    0.96 
   3   3   9    1.45    0.83 
  -6   3   9    2.94    0.92 
  -3  -3   9    2.40    1.07 
   3   3   9    3.71    1.17 
  -6   4  -9   58.13    3.09 
   2  -6  -9   53.78    2.79 
   4   2  -9   57.59    2.80 
  -2   6  -9   54.13    2.70 
   6  -4  -9   56.89    2.73 
   4   2  -9   57.06    2.89 
   6  -4  -9   63.04    3.14 
  -4  -2  -9   55.51    2.80 
  -4  -2  -9   56.46    2.56 
  -2   6  -9   58.93    3.39 
   4   2   9   56.07    3.02 
   4   2   9   59.57    2.79 
  -6   4   9   51.87    2.74 
  -2   6   9   58.43    3.17 
  -6   4   9   57.44    2.50 
  -4  -2   9   62.15    3.17 
  -2   6   9   51.49    2.90 
   1  -6  -9   25.72    2.30 
  -5  -1  -9   31.15    2.05 
   5   1  -9   28.87    2.10 
   6  -5  -9   30.55    2.65 
  -1   6  -9   25.51    2.26 
   5   1  -9   33.66    2.59 
   6  -5  -9   30.83    2.13 
  -5  -1  -9   26.03    1.92 
  -6   5  -9   27.49    2.57 
  -6   5   9   27.71    2.43 
  -5  -1   9   28.64    2.66 
   1  -6   9   30.96    2.86 
  -1   6   9   27.66    2.52 
   5   1   9   27.95    2.03 
  -1   6   9   30.24    2.57 
   6   0  -9    1.01    1.14 
  -6   0  -9    0.61    0.72 
   0  -6  -9   -0.04    0.76 
  -6   6  -9    1.74    1.13 
   6   0  -9   -0.69    0.69 
   0   6  -9    1.40    0.92 
  -6   0  -9    0.29    0.79 
   6  -6  -9    1.25    1.09 
   6  -6  -9    0.51    0.87 
  -6   6   9   -0.77    0.77 
   0  -6   9    0.53    1.09 
   6   0   9    1.90    0.83 
   0   6   9    0.23    0.82 
  -6   0   9    0.78    0.86 
   0   6   9   -0.28    0.84 
   6  -7  -9   40.08    2.62 
  -6   7  -9   43.16    3.02 
   7  -1  -9   41.00    3.06 
   6  -7  -9   40.90    3.00 
  -7   1  -9   45.24    2.79 
   1   6  -9   40.09    2.63 
  -1  -6  -9   43.38    2.75 
   7  -1  -9   44.31    2.45 
  -6   7   9   42.81    2.79 
   1   6   9   41.84    2.84 
   1   6   9   42.41    2.63 
  -7   1   9   41.57    2.72 
  -1  -6   9   41.06    2.93 
   2   5  -9    0.33    0.73 
  -5   7  -9   -0.12    0.98 
   7  -2  -9   -0.01    0.99 
  -5   7  -9    0.16    0.65 
  -2  -5  -9    0.84    0.84 
  -7   2  -9   -0.28    0.93 
   7  -2  -9    0.64    0.77 
   5  -7  -9   -0.80    0.74 
   5  -7  -9    1.10    1.06 
   2   5   9   -0.27    0.81 
  -2  -5   9    0.05    1.06 
  -5   7   9   -0.06    0.90 
  -7   2   9   -1.39    0.76 
   2   5   9   -0.79    0.72 
   4  -7  -9   22.21    2.17 
  -7   3  -9   20.24    2.14 
   7  -3  -9   18.38    2.20 
   4  -7  -9   20.02    2.30 
   3   4  -9   20.49    2.05 
   3   4  -9   22.88    2.28 
  -4   7  -9   18.24    2.30 
  -4   7  -9   22.54    2.02 
  -3  -4  -9   22.81    2.18 
  -4   7   9   21.80    2.21 
   3   4   9   23.87    2.35 
  -3  -4   9   19.98    2.33 
   3   4   9   15.53    1.91 
  -7   3   9   17.75    1.81 
  -7   3   9   27.60    2.36 
   4   3  -9   43.12    2.59 
  -4  -3  -9   41.75    2.53 
   4   3  -9   44.19    2.67 
   7  -4  -9   39.88    2.83 
   3  -7  -9   40.34    2.56 
  -3   7  -9   38.20    2.39 
  -7   4  -9   41.38    2.77 
  -3   7  -9   41.95    2.98 
  -4  -3   9   36.62    2.69 
   4   3   9   39.83    2.76 
   4   3   9   42.16    2.54 
  -3   7   9   38.46    2.50 
  -7   4   9   42.25    2.38 
  -3   7   9   41.70    2.93 
  -7   4   9   44.61    2.54 
   7  -5  -9    0.28    0.99 
  -7   5  -9   -0.04    0.94 
  -2   7  -9   -0.05    0.78 
  -5  -2  -9    1.78    0.89 
   2  -7  -9   -1.25    0.62 
   5   2  -9    1.19    0.86 
  -5  -2  -9    1.23    0.81 
   5   2  -9    1.06    0.93 
   2  -7   9    0.73    0.99 
   5   2   9   -0.40    0.79 
  -2   7   9    0.78    1.01 
  -7   5   9    0.30    0.81 
  -2   7   9    0.16    0.89 
   5   2   9    0.92    1.18 
  -5  -2   9   -0.17    0.80 
  -6  -1  -9    9.19    1.45 
   6   1  -9    9.59    1.48 
   1  -7  -9   10.14    1.60 
   7  -6  -9   12.17    1.94 
  -1   7  -9   10.45    1.57 
   6   1  -9   13.41    1.99 
  -6  -1  -9   10.76    1.62 
  -7   6  -9    7.69    1.63 
  -7   6   9    8.97    1.58 
  -6  -1   9    6.61    1.48 
   1  -7   9   14.50    2.16 
   6   1   9   12.89    1.73 
  -1   7   9   12.40    1.95 
  -1   7   9   11.15    1.65 
   7   0  -9   14.01    1.69 
  -7   7  -9   15.32    2.26 
   7   0  -9   17.33    2.35 
   0   7  -9   16.92    2.06 
   0  -7  -9   15.33    2.01 
  -7   0  -9   15.25    1.99 
   7  -7  -9   15.71    2.21 
   0  -7   9   18.14    2.52 
   0   7   9   12.75    1.98 
  -7   0   9   16.41    2.09 
   0   7   9   14.58    1.84 
   7   0   9   16.94    2.19 
  -7   7   9   16.95    2.09 
  -1  -7  -9    0.24    0.95 
   8  -1  -9    0.45    1.39 
  -7   8  -9    0.98    0.98 
  -8   1  -9    0.39    0.96 
   1   7  -9    1.19    0.99 
   7  -8  -9   -0.18    1.02 
  -1  -7   9    0.86    1.30 
  -8   1   9    0.47    1.03 
   1   7   9   -0.62    0.78 
  -7   8   9    0.87    0.97 
   1   7   9   -0.06    0.94 
  -2  -6  -9   26.36    2.48 
  -8   2  -9   25.30    2.51 
   2   6  -9   24.43    2.45 
   6  -8  -9   26.95    2.90 
  -6   8  -9   25.59    2.90 
   8  -2  -9   24.18    2.71 
  -6   8   9   24.00    2.58 
  -8   2   9   28.23    2.67 
   2   6   9   27.52    2.82 
   2   6   9   25.65    2.36 
  -2  -6   9   23.20    2.64 
   8  -3  -9   15.38    2.15 
  -3  -5  -9   12.77    1.77 
   5  -8  -9   16.35    1.94 
   3   5  -9   12.83    1.78 
   5  -8  -9   14.05    2.17 
  -5   8  -9   11.87    2.06 
  -8   3  -9   16.68    2.20 
  -3  -5   9   12.35    1.93 
   3   5   9   16.10    2.04 
  -8   3   9   13.76    1.93 
   3   5   9   13.09    1.82 
  -5   8   9   13.18    1.87 
   4  -8  -9    1.22    1.16 
  -4   8  -9    3.09    1.35 
  -4   8  -9    2.23    0.96 
   4  -8  -9    2.23    1.08 
  -4  -4  -9    1.88    1.08 
   4   4  -9    1.45    1.05 
  -8   4  -9    1.46    0.97 
   4   4  -9    0.50    0.93 
   8  -4  -9    2.11    1.18 
  -4   8   9    0.97    1.06 
   4   4   9    2.55    1.12 
   4   4   9    1.24    1.01 
  -8   4   9   -0.22    0.70 
  -4  -4   9    2.93    1.35 
  -8   4   9    1.17    0.89 
  -8   5  -9   24.49    2.67 
   3  -8  -9   26.62    2.46 
   8  -5  -9   29.25    2.96 
   5   3  -9   28.12    2.60 
  -5  -3  -9   32.11    2.40 
  -3   8  -9   25.48    2.36 
   5   3  -9   22.58    2.39 
   5   3   9   33.30    2.83 
   3  -8   9   27.17    2.73 
  -3   8   9   27.46    2.64 
  -8   5   9   30.08    2.62 
  -3   8   9   26.48    2.85 
  -5  -3   9   28.07    2.81 
   5   3   9   31.57    2.46 
   6   2  -9   11.84    1.70 
   2  -8  -9   13.13    1.92 
  -6  -2  -9   12.33    1.67 
   8  -6  -9   10.80    1.85 
   6   2  -9   14.14    2.00 
  -8   6  -9    8.55    1.77 
  -2   8  -9   14.01    1.83 
  -2   8   9   10.36    1.93 
   6   2   9   16.13    2.01 
   6   2   9   11.98    1.89 
  -6  -2   9   12.96    1.92 
  -8   6   9    8.82    1.65 
  -2   8   9   14.55    1.89 
   2  -8   9   13.88    2.18 
   7   1  -9    1.54    1.02 
  -7  -1  -9    0.81    0.93 
   8  -7  -9    0.94    1.20 
  -8   7  -9    0.95    1.06 
  -1   8  -9    0.69    0.93 
   7   1  -9   -0.24    1.11 
   1  -8  -9    1.54    1.04 
   7   1   9    0.43    1.03 
   1  -8   9    1.34    1.32 
  -8   7   9    2.87    1.18 
  -1   8   9    3.34    1.38 
  -1   8   9   -0.34    0.88 
  -7  -1   9    0.68    0.98 
   0  -8  -9   26.25    2.72 
   8  -8  -9   25.43    3.01 
  -8   8  -9   21.47    2.64 
  -8   0  -9   17.33    2.24 
   8   0  -9   18.66    2.64 
   0   8  -9   17.09    2.21 
   0  -8   9   18.89    2.51 
   0   8   9   22.95    2.79 
  -8   0   9   19.55    2.57 
   0   8   9   19.27    2.18 
  -8   8   9   19.78    2.42 
   9  -1  -9   23.10    2.96 
  -9   1  -9   14.38    2.04 
   8  -9  -9   19.78    2.69 
  -8   9  -9   16.39    2.57 
  -1  -8  -9   21.83    2.62 
   1   8  -9   19.95    2.45 
  -9   1   9   17.98    2.41 
  -8   9   9   19.99    2.49 
  -1  -8   9   20.74    2.77 
   1   8   9   20.85    2.71 
  -9   2  -9   17.61    2.38 
  -2  -7  -9   20.01    2.47 
   9  -2  -9   19.62    2.73 
   2   7  -9   21.20    2.51 
  -7   9  -9   15.54    2.37 
   7  -9  -9   16.19    2.44 
   2   7   9   15.88    2.39 
  -9   2   9   18.08    2.33 
  -7   9   9   21.43    2.52 
  -2  -7   9   19.69    2.63 
  -6   9  -9   -0.05    0.95 
  -3  -6  -9   -0.98    0.90 
   6  -9  -9    0.87    1.12 
  -9   3  -9    0.25    1.12 
   3   6  -9   -1.11    0.79 
   9  -3  -9    0.70    1.18 
  -9   3   9   -0.29    0.96 
   3   6   9   -0.26    1.01 
  -6   9   9    0.38    0.99 
  -3  -6   9    0.98    1.21 
  -9   4  -9   15.86    2.31 
  -4  -5  -9   14.62    2.00 
   9  -4  -9   14.55    2.39 
   5  -9  -9   15.53    2.40 
   5  -9  -9   17.07    2.04 
  -5   9  -9   18.12    2.57 
   4   5  -9   16.37    2.18 
  -5   9   9   18.16    2.21 
   4   5   9   15.03    2.15 
  -9   4   9   17.36    2.17 
  -4  -5   9   18.24    2.51 
   5   4  -9   40.18    2.76 
  -5  -4  -9   36.16    2.66 
   5   4  -9   43.51    3.07 
   9  -5  -9   40.99    3.21 
  -9   5  -9   42.07    3.17 
   4  -9  -9   42.73    3.24 
   4  -9  -9   34.55    2.94 
  -4   9  -9   41.66    3.69 
  -4   9  -9   35.73    2.48 
  -9   5   9   39.91    2.72 
  -5  -4   9   33.64    3.23 
  -4   9   9   39.46    2.83 
   5   4   9   34.81    2.76 
  -9   6  -9    1.84    1.27 
   6   3  -9    0.81    1.12 
  -6  -3  -9    0.82    1.04 
   9  -6  -9    0.68    1.18 
   6   3  -9    0.49    0.93 
  -3   9  -9    0.99    0.94 
   3  -9  -9    3.71    1.27 
  -9   6   9    1.24    1.13 
   3  -9   9    1.21    1.31 
  -3   9   9    3.00    1.63 
  -3   9   9    2.34    1.11 
   6   3   9    2.24    1.28 
  -6  -3   9    0.86    1.11 
   7   2  -9   14.26    1.94 
   9  -7  -9   15.64    2.42 
   7   2  -9   14.08    2.24 
  -9   7  -9   11.45    2.12 
   2  -9  -9   15.77    2.15 
  -2   9  -9   14.35    2.00 
   2  -9   9   16.22    2.50 
  -7  -2   9   16.42    2.27 
  -2   9   9   15.31    2.43 
   7   2   9   16.37    2.27 
  -9   7   9   13.42    2.02 
  -2   9   9   17.20    2.12 
   9  -8  -9   25.11    3.11 
  -1   9  -9   25.48    2.66 
  -9   8  -9   21.02    2.77 
   8   1  -9   24.66    2.95 
  -8  -1  -9   21.59    2.49 
   1  -9  -9   25.21    2.64 
  -1   9   9   23.82    2.45 
  -8  -1   9   23.66    2.83 
   8   1   9   20.58    2.43 
   1  -9   9   27.00    3.05 
  -1   9   9   19.12    2.77 
  -9   8   9   22.42    2.75 
   9   0  -9   -0.57    1.46 
   0  -9  -9   -0.44    1.11 
   0   9  -9    2.19    1.16 
  -9   9  -9   -1.79    0.81 
  -9   0  -9    0.01    0.90 
   9  -9  -9    1.75    1.34 
   0   9   9    1.23    1.49 
  -9   0   9   -1.10    1.03 
  -9   9   9    0.01    1.17 
   0  -9   9   -0.44    1.25 
 -10   1  -9   11.84    2.20 
  -9  10  -9   13.25    2.38 
   1   9  -9   13.13    2.27 
   9 -10  -9   12.55    2.53 
  -1  -9  -9   13.25    2.29 
  10  -1  -9   11.47    2.68 
 -10   1   9   18.82    2.63 
  -1  -9   9   13.29    2.39 
  -9  10   9   11.59    2.29 
   1   9   9   15.03    2.65 
  10  -2  -9    1.08    1.78 
 -10   2  -9   -1.02    0.87 
   8 -10  -9    2.50    1.55 
  -8  10  -9    0.73    1.26 
   2   8  -9    4.07    1.50 
  -2  -8  -9   -1.00    1.02 
   2   8   9    1.46    1.44 
  -8  10   9    0.74    1.21 
  -2  -8   9    2.03    1.54 
 -10   2   9    2.92    1.42 
  10  -3  -9   19.57    2.86 
  -7  10  -9   21.64    2.95 
   7 -10  -9   23.76    3.03 
   3   7  -9   21.35    2.59 
  -3  -7  -9   23.04    2.68 
 -10   3  -9   21.50    2.73 
  -7  10   9   24.65    2.80 
 -10   3   9   22.83    2.68 
   3   7   9   25.33    2.92 
  -3  -7   9   21.52    2.83 
 -10   4  -9   10.81    2.11 
   6 -10  -9    6.27    1.79 
   4   6  -9   10.49    1.89 
  -6  10  -9    9.98    2.00 
  -4  -6  -9    9.48    1.87 
  10  -4  -9   13.39    2.37 
 -10   4   9    8.09    1.83 
  -6  10   9   10.10    1.89 
  -4  -6   9   11.60    2.09 
   4   6   9   10.12    1.95 
   5 -10  -9   -0.98    1.00 
   5 -10  -9    0.84    1.11 
  -5  10  -9    0.87    1.26 
  -5  -5  -9    1.27    1.10 
  10  -5  -9    1.02    1.15 
 -10   5  -9    1.24    1.12 
   5   5  -9    0.23    1.01 
   5   5   9    0.98    1.23 
  -5  10   9   -0.18    1.06 
  -5  -5   9    0.67    1.26 
  -6  -4  -9   27.04    2.74 
  10  -6  -9   22.03    2.96 
   4 -10  -9   24.46    2.72 
  -4  10  -9   25.44    2.56 
   6   4  -9   20.10    2.48 
   6   4  -9   30.06    3.10 
 -10   6  -9   30.54    3.20 
   6   4   9   26.17    2.79 
  -4  10   9   23.12    2.54 
 -10   6   9   25.25    2.66 
   4 -10   9   25.46    3.01 
  -4  10   9   30.71    3.41 
  -6  -4   9   21.81    2.82 
  10  -7  -9   12.40    2.38 
  -3  10  -9   15.00    2.13 
   7   3  -9   12.21    2.24 
   7   3  -9   12.68    1.94 
 -10   7  -9   11.30    2.21 
   3 -10  -9   11.75    1.92 
   3 -10   9   14.30    2.33 
   7   3   9   13.10    2.26 
  -3  10   9   16.26    2.63 
  -3  10   9   15.40    2.22 
 -10   7   9   14.66    2.24 
  -7  -3   9   15.25    2.40 
 -10   8  -9    0.15    1.14 
  -2  10  -9    0.11    1.06 
  10  -8  -9    0.57    1.42 
   2 -10  -9    0.81    1.14 
   8   2  -9    0.65    1.34 
  -8  -2   9    0.84    1.19 
   2 -10   9   -1.32    1.09 
  -2  10   9    0.21    0.95 
   8   2   9    0.47    1.29 
 -10   8   9    0.32    1.30 
  -2  10   9    1.19    1.43 
   1 -10  -9   21.94    2.81 
  -1  10  -9   19.42    2.61 
  10  -9  -9   23.05    3.23 
 -10   9  -9   15.54    2.54 
  -9  -1  -9   18.87    2.50 
   9   1  -9   18.24    2.93 
  -1  10   9   17.44    2.91 
   1 -10   9   20.43    2.89 
 -10   9   9   19.64    2.74 
  -9  -1   9   18.44    2.62 
 -10  10  -9   12.08    2.41 
 -10   0  -9   11.64    2.21 
  10   0  -9    9.14    2.28 
   0 -10   9   11.25    2.42 
   0  10   9   11.43    2.50 
  -9  11  -9    7.56    2.10 
  11  -2  -9    8.81    2.51 
  -2  -9   9    6.32    2.02 
   8 -11  -9   15.91    2.79 
  11  -3  -9   17.90    3.04 
 -11   3  -9   11.10    2.17 
   3   8  -9   16.66    2.56 
  -3  -8  -9   13.23    2.24 
  -8  11  -9   14.92    2.69 
  -8  11   9   13.65    2.51 
 -11   3   9   16.83    2.61 
   3   8   9   19.58    2.87 
  -3  -8   9   14.78    2.55 
  11  -4  -9    0.52    1.61 
   7 -11  -9    0.73    1.36 
  -7  11  -9    0.19    1.28 
  -4  -7  -9    1.39    1.26 
   4   7  -9   -0.03    1.09 
 -11   4  -9   -0.76    1.21 
  -4  -7   9   -1.87    1.31 
  -7  11   9   -0.72    1.04 
 -11   4   9   -0.86    1.18 
   4   7   9   -1.04    1.09 
  -5  -6  -9    7.48    1.74 
 -11   5  -9    5.08    1.69 
   5   6  -9    6.92    1.81 
  11  -5  -9   10.75    2.18 
   6 -11  -9    7.85    1.98 
  -6  11  -9    7.46    2.02 
  -5  -6   9    7.65    1.97 
  -6  11   9   11.44    2.15 
   5   6   9    7.90    1.96 
  11  -6  -9    8.14    2.26 
   6   5  -9   10.21    2.01 
 -11   6  -9   10.34    2.24 
   5 -11  -9    7.51    1.99 
  -6  -5  -9   11.28    2.02 
   5 -11  -9   11.34    2.07 
   5 -11   9   12.47    2.31 
   6   5   9    7.55    1.97 
  -6  -5   9   11.41    2.34 
  -5  11   9    7.31    1.82 
 -11   7  -9   -0.97    0.90 
   7   4  -9   -0.12    1.15 
   7   4  -9    0.57    1.38 
   4 -11  -9    1.35    1.22 
  -4  11  -9   -0.59    1.02 
  11  -7  -9    0.53    1.33 
   4 -11   9    0.53    1.43 
 -11   7   9   -0.55    1.29 
  -7  -4   9    0.47    1.39 
  -4  11   9   -0.05    1.16 
  -4  11   9    0.24    1.65 
   7   4   9    1.95    1.40 
  11  -8  -9   16.25    2.87 
   3 -11  -9   19.41    2.60 
 -11   8  -9   16.07    2.74 
  -3  11  -9   19.74    2.52 
   8   3  -9   15.24    2.62 
   3 -11   9   16.55    2.68 
   8   3   9   16.75    2.73 
  -3  11   9   22.81    3.39 
  -8  -3   9   13.36    2.84 
 -11   8   9   19.91    2.72 
  -2  11  -9   14.95    2.38 
   9   2  -9   18.16    2.91 
   2 -11   9   11.17    2.52 
  -6  -6  -9    1.07    1.38 
   0   0 -10   49.06    2.29 
   0   0 -10   45.99    2.45 
   0   0  10   47.08    2.52 
   1   0 -10   12.43    1.50 
   1  -1 -10   10.53    1.41 
  -1   0 -10   12.58    1.41 
   0  -1 -10    7.93    1.30 
   1   0 -10   13.29    0.88 
  -1   1 -10   13.74    1.56 
  -1   1 -10   12.36    1.55 
   0   1 -10   10.52    1.38 
  -1   0 -10   10.22    1.36 
   0  -1 -10   13.50    0.92 
   0  -1 -10   12.07    1.27 
   0   1 -10   11.40    1.51 
   1  -1 -10   12.10    0.92 
   0  -1  10   11.22    1.43 
   0   1  10   12.99    1.70 
  -1   0  10   12.98    1.47 
  -1   1  10   12.47    1.32 
  -1   0  10   10.64    1.50 
  -1   1  10   10.75    1.60 
  -2   1 -10   49.85    2.50 
  -1   2 -10   52.24    2.61 
   2  -1 -10   54.56    2.06 
   1  -2 -10   58.57    2.16 
  -1  -1 -10   52.92    2.27 
   1   1 -10   51.94    2.70 
  -2   1 -10   51.73    2.54 
   1  -2 -10   47.35    2.67 
  -1   2 -10   49.66    2.58 
  -1  -1 -10   51.04    2.66 
  -1   2  10   53.60    2.15 
  -2   1  10   50.73    2.61 
  -2   1  10   55.71    2.44 
  -1   2  10   54.81    2.81 
  -1  -1  10   50.99    2.61 
   1   1  10   55.95    2.86 
  -1  -1  10   53.82    2.57 
  -2   2 -10    8.13    1.27 
   2   0 -10   13.01    1.10 
   2  -2 -10   11.94    1.57 
   0   2 -10   10.47    1.53 
   2   0 -10   11.34    1.57 
  -2   0 -10   11.52    1.59 
   2  -2 -10   11.28    1.17 
  -2   2 -10    9.15    1.31 
   0  -2 -10   10.31    1.45 
   0  -2 -10   11.25    1.14 
  -2   0 -10   12.09    1.42 
  -2   2  10    9.51    1.40 
  -2   0  10   10.77    1.39 
  -2   2  10   11.92    1.23 
   0  -2  10   12.17    1.60 
   0   2  10   12.30    1.22 
   0   2  10    9.75    1.44 
  -2   0  10    7.90    1.23 
   3  -1 -10    6.49    1.29 
   3  -1 -10    5.33    0.93 
   1   2 -10    8.18    1.39 
  -2   3 -10    8.48    1.44 
  -2   3 -10    7.26    1.30 
  -3   1 -10    5.39    1.07 
  -1  -2 -10    9.42    1.13 
   2  -3 -10    6.47    1.31 
  -1  -2 -10    4.34    1.09 
  -3   1 -10    6.85    1.20 
   2  -3 -10    5.55    0.96 
  -3   1  10    7.26    1.18 
   1   2  10    6.10    0.95 
  -2   3  10    5.21    0.80 
  -1  -2  10    6.12    1.25 
  -3   1  10    5.70    1.12 
  -1  -2  10    6.80    1.17 
   1   2  10    9.06    1.52 
  -2   3  10    4.95    1.16 
   3  -2 -10   22.67    1.51 
  -2  -1 -10   22.74    2.04 
  -3   2 -10   21.09    1.99 
  -3   2 -10   25.05    1.82 
  -1   3 -10   23.62    2.27 
   1  -3 -10   22.45    2.12 
  -1   3 -10   22.27    2.01 
   2   1 -10   24.72    2.23 
   3  -2 -10   20.75    1.92 
  -2  -1 -10   23.46    1.58 
  -3   2  10   23.49    1.59 
  -2  -1  10   23.48    2.19 
   2   1  10   24.30    2.29 
  -1   3  10   21.94    2.18 
  -1   3  10   23.08    1.59 
  -2  -1  10   22.90    1.73 
  -3   2  10   23.95    2.11 
   3   0 -10   27.39    1.99 
  -3   0 -10   26.13    2.20 
   3  -3 -10   23.30    2.12 
  -3   3 -10   25.02    1.84 
   0   3 -10   27.55    2.31 
  -3   3 -10   30.43    2.55 
   3   0 -10   28.07    1.65 
   0  -3 -10   26.24    2.25 
   3  -3 -10   26.61    1.77 
  -3   0 -10   28.12    1.84 
   0   3  10   27.05    1.74 
  -3   3  10   26.71    2.04 
  -3   3  10   29.83    1.57 
   0   3  10   17.74    1.94 
  -3   0  10   28.15    1.87 
   0  -3  10   23.45    2.32 
  -3   0  10   25.62    1.93 
   3  -4 -10    3.17    0.91 
  -3   4 -10    4.22    1.20 
   1   3 -10    4.84    1.12 
  -4   1 -10    4.74    1.08 
  -4   1 -10    5.22    1.14 
   4  -1 -10    2.75    1.02 
   3  -4 -10    3.32    1.03 
  -1  -3 -10    3.69    1.09 
  -3   4 -10    3.10    0.95 
   4  -1 -10    3.24    0.91 
  -3   4  10    3.52    1.12 
  -1  -3  10    3.93    0.94 
   1   3  10    4.71    0.98 
  -4   1  10    4.22    1.01 
   1   3  10    3.65    1.23 
  -1  -3  10    3.65    1.24 
  -4   1  10    4.49    1.04 
  -2   4 -10   36.74    2.50 
   2  -4 -10   44.10    2.33 
  -4   2 -10   49.61    2.60 
  -2   4 -10   43.61    2.43 
   2  -4 -10   42.65    2.43 
  -2  -2 -10   41.47    1.97 
   2   2 -10   41.41    2.53 
   4  -2 -10   45.26    2.56 
  -2  -2 -10   42.59    2.44 
   4  -2 -10   44.95    2.31 
  -4   2 -10   42.41    2.32 
  -2   4  10   41.75    2.53 
   2   2  10   42.51    2.06 
   2   2  10   44.20    2.71 
  -2  -2  10   40.91    2.65 
  -4   2  10   42.31    2.32 
  -4   2  10   41.78    2.23 
  -2  -2  10   44.22    2.22 
   1  -4 -10    3.59    1.01 
  -4   3 -10    2.26    0.86 
   3   1 -10    2.60    0.99 
  -1   4 -10    3.16    1.12 
  -4   3 -10    4.40    1.16 
  -3  -1 -10    3.45    1.00 
  -3  -1 -10    4.64    0.98 
  -1   4 -10    3.85    1.10 
   4  -3 -10    4.04    1.08 
   3   1 -10    2.02    0.82 
   4  -3 -10    4.44    1.01 
  -1   4  10    2.91    0.97 
  -1   4  10    3.72    1.15 
  -3  -1  10    4.44    1.19 
  -4   3  10    4.99    1.20 
  -3  -1  10    3.17    0.90 
  -4   3  10    3.10    0.78 
  -4   0 -10    4.10    1.04 
   4  -4 -10    4.47    1.06 
   4   0 -10    4.17    1.16 
  -4   4 -10    0.87    0.83 
  -4   4 -10    2.18    0.86 
   0   4 -10    4.03    1.12 
   4   0 -10    4.22    1.04 
  -4   0 -10    1.55    0.85 
   4  -4 -10    3.08    1.08 
   0  -4 -10    4.32    1.12 
   0  -4  10    3.21    1.12 
   0   4  10    6.29    1.17 
  -4   4  10    6.37    1.34 
  -4   0  10    2.72    0.88 
   0   4  10    3.06    1.13 
  -4   0  10    2.82    1.08 
   4  -5 -10   56.28    3.02 
  -4   5 -10   51.97    3.19 
   4  -5 -10   54.32    2.86 
   1   4 -10   48.30    2.71 
  -5   1 -10   53.60    2.77 
  -5   1 -10   51.68    2.76 
   5  -1 -10   52.94    2.68 
  -1  -4 -10   54.49    2.87 
  -4   5 -10   51.91    2.62 
   5  -1 -10   55.71    2.84 
  -4   5  10   54.60    2.95 
  -1  -4  10   51.87    3.14 
   1   4  10   53.32    2.74 
  -5   1  10   55.50    2.84 
   1   4  10   49.19    2.99 
  -5   1  10   50.49    2.49 
  -5   2 -10   32.66    2.31 
  -3   5 -10   32.36    2.11 
   2   3 -10   32.99    2.24 
   3  -5 -10   35.29    2.35 
  -3   5 -10   36.44    2.51 
   3  -5 -10   32.05    2.25 
   5  -2 -10   30.10    2.23 
  -2  -3 -10   33.81    2.25 
  -5   2 -10   30.31    2.05 
   5  -2 -10   33.81    2.22 
  -3   5  10   31.28    2.26 
  -5   2  10   30.30    2.05 
  -2  -3  10   30.77    2.79 
   2   3  10   34.45    2.08 
   2   3  10   33.52    2.42 
  -5   2  10   29.92    2.04 
  -3  -2 -10   18.30    1.93 
  -2   5 -10   11.79    1.76 
  -5   3 -10   16.05    1.66 
   2  -5 -10   12.41    1.70 
   5  -3 -10   15.79    1.78 
   5  -3 -10   13.00    1.67 
  -5   3 -10   15.78    1.91 
   3   2 -10   17.15    1.98 
  -3  -2 -10   11.90    1.39 
  -2   5 -10   15.26    1.79 
   3   2  10   17.02    1.99 
  -2   5  10   12.33    1.65 
   3   2  10   14.36    1.50 
  -5   3  10   10.97    1.52 
  -3  -2  10   13.01    1.88 
  -2   5  10   11.83    1.69 
  -5   3  10   14.49    1.50 
   4   1 -10   25.45    2.24 
   4   1 -10   29.55    2.04 
  -4  -1 -10   28.20    1.92 
  -5   4 -10   28.14    2.62 
  -5   4 -10   27.22    1.86 
  -4  -1 -10   24.75    2.16 
   1  -5 -10   23.81    2.20 
   5  -4 -10   27.25    2.27 
  -1   5 -10   30.25    2.17 
   5  -4 -10   28.20    2.10 
  -4  -1  10   29.49    2.59 
  -1   5  10   23.59    2.19 
   1  -5  10   22.37    2.39 
  -1   5  10   27.43    2.41 
  -5   4  10   22.55    2.10 
   0   5 -10   18.49    2.03 
  -5   5 -10   15.75    2.02 
   5  -5 -10   18.00    2.06 
  -5   5 -10   18.68    1.79 
  -5   0 -10   19.70    1.93 
   5  -5 -10   12.43    1.76 
   5   0 -10   17.74    2.09 
   0  -5 -10   19.86    2.07 
  -5   0 -10   16.36    1.87 
   5   0 -10   18.88    1.97 
  -5   5  10   16.38    1.94 
   0   5  10   19.78    2.09 
   0   5  10   19.33    2.05 
  -5   0  10   18.60    2.03 
   0  -5  10   14.69    2.10 
   5  -6 -10    9.62    1.69 
   5  -6 -10    9.17    1.60 
  -1  -5 -10    5.42    1.25 
  -6   1 -10    9.83    1.51 
   6  -1 -10    6.98    1.40 
  -5   6 -10    7.25    1.25 
   6  -1 -10   10.30    1.64 
  -5   6 -10    9.54    1.82 
   1   5 -10    8.74    1.49 
  -6   1 -10    5.87    1.27 
  -5   6  10    7.41    1.45 
   1   5  10    7.43    1.39 
   1   5  10    8.02    1.48 
  -1  -5  10    7.83    1.67 
  -6   1  10    7.93    1.44 
  -6   2 -10    8.72    1.37 
   6  -2 -10   10.22    1.55 
  -4   6 -10    9.59    1.72 
   4  -6 -10    8.87    1.52 
  -4   6 -10    8.53    1.30 
  -2  -4 -10    9.15    1.55 
   2   4 -10    9.06    1.55 
  -6   2 -10    8.78    1.58 
   4  -6 -10    9.33    1.50 
   6  -2 -10    6.05    1.36 
  -6   2  10    9.70    1.48 
   2   4  10    7.46    1.50 
  -2  -4  10    6.48    1.48 
  -4   6  10   11.50    1.81 
  -6   2  10   11.74    1.49 
   2   4  10    8.83    1.51 
   6  -3 -10   40.11    2.48 
  -6   3 -10   42.88    2.77 
   6  -3 -10   36.97    2.59 
   3  -6 -10   42.77    2.62 
   3   3 -10   35.74    2.52 
   3  -6 -10   36.90    2.56 
  -3  -3 -10   38.82    2.50 
  -3   6 -10   37.92    2.43 
  -6   3  10   37.25    2.34 
  -3  -3  10   37.87    2.73 
   3   3  10   39.08    2.36 
   3   3  10   44.83    2.76 
  -6   3  10   42.72    2.45 
  -3   6  10   39.46    2.67 
   4   2 -10    5.70    1.21 
  -4  -2 -10    5.68    1.22 
   6  -4 -10    4.68    1.18 
   2  -6 -10    5.58    1.33 
   4   2 -10    5.35    1.30 
  -6   4 -10    6.68    1.49 
   6  -4 -10    4.98    1.32 
  -2   6 -10    5.13    1.25 
  -2   6 -10    6.36    1.54 
  -2   6  10    5.09    1.29 
  -6   4  10    6.10    1.25 
   4   2  10    5.31    1.12 
   4   2  10    5.52    1.37 
  -4  -2  10    5.48    1.34 
  -2   6  10    5.19    1.30 
  -5  -1 -10    0.40    0.74 
   6  -5 -10    0.14    0.87 
   5   1 -10    1.11    0.87 
   1  -6 -10    1.15    0.92 
  -5  -1 -10    1.59    0.93 
  -6   5 -10    1.22    1.09 
   5   1 -10    1.59    0.97 
  -1   6 -10   -0.18    0.77 
   6  -5 -10    1.50    0.91 
  -6   5  10    1.29    0.96 
  -5  -1  10    1.63    1.07 
   1  -6  10    2.77    1.22 
  -1   6  10    0.54    0.98 
  -1   6  10    1.06    0.90 
   6  -6 -10   30.55    2.74 
   6   0 -10   30.57    2.76 
  -6   6 -10   29.94    2.90 
  -6   0 -10   23.58    2.29 
   0   6 -10   27.11    2.52 
   6  -6 -10   27.96    2.54 
  -6   0 -10   31.19    2.20 
   6   0 -10   25.29    2.31 
   0  -6 -10   30.32    2.67 
  -6   6  10   33.21    2.53 
   0   6  10   28.55    2.60 
   0   6  10   27.40    2.58 
  -6   0  10   32.87    2.84 
   0  -6  10   27.29    2.91 
   6  -7 -10    9.29    1.71 
  -7   1 -10    7.66    1.55 
   7  -1 -10    6.64    1.70 
   6  -7 -10    5.77    1.41 
   7  -1 -10    7.72    1.43 
  -6   7 -10    7.57    1.71 
  -1  -6 -10    6.64    1.53 
   1   6 -10    6.74    1.45 
  -7   1  10    7.40    1.57 
  -6   7  10    6.56    1.52 
   1   6  10    7.39    1.54 
  -1  -6  10   10.86    2.08 
   1   6  10    5.93    1.45 
   5  -7 -10   16.36    2.07 
  -2  -5 -10   15.47    1.92 
   7  -2 -10   15.06    1.83 
  -5   7 -10   15.71    1.65 
   5  -7 -10   14.91    1.88 
  -7   2 -10   14.66    1.97 
   7  -2 -10   15.39    2.01 
   2   5 -10   12.99    1.81 
  -5   7 -10    9.95    1.84 
  -5   7  10   15.88    2.05 
   2   5  10   13.11    1.92 
  -2  -5  10   14.09    2.20 
  -7   2  10   14.25    1.90 
   2   5  10   14.11    1.98 
   4  -7 -10    2.19    1.09 
   7  -3 -10    1.63    1.10 
  -4   7 -10   -0.66    0.71 
  -4   7 -10    1.48    1.19 
   4  -7 -10    3.11    1.10 
  -3  -4 -10    1.68    0.97 
   3   4 -10    0.36    0.96 
  -7   3 -10    1.72    1.12 
  -3  -4  10   -0.64    0.98 
  -4   7  10    2.67    1.09 
  -7   3  10    0.32    0.83 
   3   4  10    1.93    1.02 
   3   4  10    0.88    0.97 
  -7   3  10    1.48    0.88 
   4   3 -10   22.64    2.30 
  -7   4 -10   18.16    2.30 
   7  -4 -10   21.12    2.32 
  -3   7 -10   18.95    2.01 
  -4  -3 -10   19.42    2.08 
   3  -7 -10   15.57    1.92 
  -3   7 -10   20.11    2.55 
  -7   4  10   19.74    2.08 
  -7   4  10   19.83    1.98 
  -3   7  10   16.51    2.17 
  -4  -3  10   19.73    2.42 
  -3   7  10   20.26    2.25 
   4   3  10   18.19    2.17 
   4   3  10   17.58    1.96 
   5   2 -10   27.89    2.45 
  -5  -2 -10   26.43    2.41 
   2  -7 -10   27.26    2.62 
   7  -5 -10   28.47    2.67 
  -2   7 -10   29.87    2.59 
   5   2 -10   29.86    2.68 
  -7   5 -10   24.50    2.60 
  -5  -2  10   25.62    2.61 
   5   2  10   27.25    2.11 
  -2   7  10   29.53    2.69 
  -7   5  10   27.72    2.50 
   2  -7  10   27.51    2.91 
   5   2  10   25.05    2.44 
  -2   7  10   28.77    2.79 
   1  -7 -10    4.87    1.33 
   6   1 -10    5.64    1.59 
   6   1 -10    5.91    1.34 
  -7   6 -10    2.83    1.37 
   7  -6 -10    4.10    1.34 
  -1   7 -10    3.99    1.27 
  -6  -1 -10    4.44    1.21 
  -6  -1 -10    7.15    1.42 
   1  -7  10    4.66    1.45 
  -7   6  10    3.63    1.26 
  -1   7  10    3.06    1.31 
  -6  -1  10    5.09    1.48 
  -1   7  10    2.51    1.12 
   7  -7 -10   15.58    2.29 
   7   0 -10   16.37    2.27 
  -7   7 -10   14.47    2.09 
   0   7 -10   14.63    2.00 
   7   0 -10   13.10    1.83 
   0  -7 -10   12.86    1.92 
  -7   0 -10   13.59    1.89 
  -7   0  10   12.25    2.05 
   0   7  10   12.95    2.04 
   0  -7  10   12.64    2.13 
   0   7  10   17.79    2.12 
  -7   7  10   12.59    1.92 
  -1  -7 -10   19.77    2.32 
   7  -8 -10   22.89    2.82 
   1   7 -10   22.52    2.38 
   8  -1 -10   19.05    2.60 
  -8   1 -10   19.69    2.43 
  -7   8 -10   16.93    2.50 
  -8   1  10   20.07    2.43 
   1   7  10   24.89    2.78 
   1   7  10   23.01    2.36 
  -1  -7  10   21.59    2.72 
  -7   8  10   19.89    2.42 
  -8   2 -10    8.36    1.70 
   6  -8 -10   12.42    2.04 
  -6   8 -10    8.67    1.82 
   8  -2 -10   16.44    2.36 
  -2  -6 -10    8.77    1.71 
   2   6 -10    9.34    1.76 
  -2  -6  10    9.61    2.04 
  -8   2  10    9.01    1.75 
   2   6  10    8.12    1.58 
  -6   8  10    9.92    1.75 
   2   6  10   10.54    1.90 
   5  -8 -10    1.24    1.07 
   5  -8 -10    0.50    0.98 
   3   5 -10    1.25    1.02 
  -5   8 -10    0.97    0.98 
  -3  -5 -10   -0.23    0.74 
   8  -3 -10    0.10    1.07 
  -8   3 -10   -0.20    0.93 
  -8   3  10    0.18    1.06 
   3   5  10    0.23    0.97 
  -5   8  10   -1.29    0.76 
  -3  -5  10    2.09    1.34 
   3   5  10   -0.48    0.92 
  -4   8 -10   24.68    2.30 
   8  -4 -10   23.36    2.58 
  -8   4 -10   21.62    2.56 
  -4   8 -10   20.72    2.68 
   4   4 -10   26.00    2.68 
   4  -8 -10   24.56    2.49 
  -4  -4 -10   21.03    2.27 
   4  -8 -10   23.47    2.66 
  -8   4  10   20.04    2.14 
  -4   8  10   22.83    2.53 
   4   4  10   21.07    2.29 
  -8   4  10   28.17    2.51 
   4   4  10   23.89    2.47 
  -4  -4  10   25.33    2.76 
   3  -8 -10    7.46    1.48 
   5   3 -10    7.78    1.64 
   8  -5 -10    6.61    1.65 
  -3   8 -10    8.90    1.56 
  -8   5 -10   11.38    1.97 
  -5  -3 -10    7.48    1.46 
   5   3  10   12.05    1.83 
  -3   8  10    8.01    1.66 
   3  -8  10    7.82    1.78 
   5   3  10    5.35    1.47 
  -5  -3  10   11.02    2.00 
  -3   8  10    8.06    1.74 
  -8   5  10    7.94    1.59 
   6   2 -10    5.57    1.43 
   6   2 -10    6.04    1.54 
   8  -6 -10    3.79    1.40 
  -6  -2 -10    4.40    1.22 
   2  -8 -10    5.54    1.47 
  -8   6 -10    3.61    1.45 
  -2   8 -10    5.66    1.46 
  -2   8  10    5.79    1.58 
   2  -8  10    4.56    1.56 
  -2   8  10    7.19    1.54 
   6   2  10    5.01    1.47 
  -8   6  10    6.39    1.49 
  -6  -2  10    7.19    1.60 
   8  -7 -10   27.00    2.91 
   7   1 -10   21.40    2.28 
  -1   8 -10   19.21    2.24 
   1  -8 -10   19.82    2.44 
  -7  -1 -10   23.26    2.44 
  -8   7 -10   22.68    2.70 
   7   1 -10   23.62    2.72 
  -8   7  10   25.07    2.70 
  -1   8  10   20.04    2.34 
  -7  -1  10   24.78    2.70 
   1  -8  10   19.40    2.61 
  -1   8  10   18.43    2.44 
   0  -8 -10    6.49    1.69 
  -8   0 -10    8.91    1.76 
  -8   8 -10    6.98    1.70 
   8   0 -10    9.84    2.18 
   8  -8 -10    6.27    1.77 
   0   8 -10    7.17    1.58 
  -8   8  10    5.28    1.55 
   0  -8  10    4.71    1.78 
  -8   0  10    8.96    1.88 
   0   8  10    6.63    1.52 
   0   8  10    2.79    1.51 
  -9   1 -10    2.92    1.37 
  -8   9 -10    3.32    1.50 
   8  -9 -10    3.96    1.59 
  -1  -8 -10    2.52    1.34 
   1   8 -10    0.94    1.13 
   9  -1 -10    5.11    1.86 
   1   8  10    2.35    1.46 
  -8   9  10    3.63    1.44 
  -1  -8  10    4.16    1.77 
  -9   1  10    4.42    1.51 
   7  -9 -10    3.69    1.60 
  -9   2 -10    3.28    1.40 
   2   7 -10    5.90    1.48 
  -7   9 -10    6.06    1.75 
  -2  -7 -10    8.97    1.87 
   9  -2 -10    9.49    2.12 
  -2  -7  10    5.77    1.81 
  -9   2  10    3.29    1.45 
  -7   9  10    6.25    1.63 
   2   7  10    8.73    1.92 
  -9   3 -10   27.24    2.89 
  -3  -6 -10   29.50    2.87 
   9  -3 -10   36.86    3.52 
   6  -9 -10   33.09    3.26 
  -6   9 -10   31.03    3.20 
   3   6 -10   28.36    2.83 
   3   6  10   35.42    3.25 
  -9   3  10   34.46    3.11 
  -6   9  10   31.98    3.07 
  -3  -6  10   32.39    3.30 
   4   5 -10    5.23    1.44 
   9  -4 -10    3.51    1.54 
  -4  -5 -10    3.59    1.26 
   5  -9 -10    3.74    1.35 
  -5   9 -10    4.66    1.47 
   5  -9 -10    2.83    1.37 
  -9   4 -10    3.96    1.46 
  -4  -5  10    5.44    1.73 
  -9   4  10    4.11    1.37 
  -5   9  10    5.62    1.48 
   4   5  10    2.66    1.23 
  -5  -4 -10    5.31    1.39 
  -4   9 -10    6.13    1.62 
  -9   5 -10    5.71    1.56 
   4  -9 -10    3.40    1.46 
  -4   9 -10    5.45    1.32 
   9  -5 -10    2.91    1.42 
   4  -9 -10    5.73    1.52 
   5   4 -10    9.03    1.74 
   5   4  10    5.67    1.52 
  -9   5  10    7.25    1.55 
  -5  -4  10    5.65    1.76 
  -4   9  10    8.88    1.77 
   9  -6 -10   18.82    2.68 
   6   3 -10   15.93    2.09 
  -3   9 -10   19.38    2.21 
   3  -9 -10   17.71    2.27 
  -9   6 -10   19.53    2.62 
  -6  -3 -10   21.21    2.31 
  -3   9  10   18.30    2.62 
  -9   6  10   14.19    2.08 
   3  -9  10   20.83    2.71 
   6   3  10   16.53    2.20 
  -3   9  10   20.43    2.41 
  -6  -3  10   15.75    2.33 
  -2   9 -10    2.59    1.24 
   7   2 -10    3.47    1.29 
   7   2 -10    0.76    1.30 
  -9   7 -10    4.90    1.66 
   2  -9 -10    5.19    1.45 
   9  -7 -10    2.16    1.43 
  -9   7  10    5.05    1.55 
  -2   9  10    3.31    1.35 
  -7  -2  10    4.27    1.52 
  -2   9  10    3.11    1.63 
   2  -9  10    2.41    1.56 
   1  -9 -10    2.29    1.39 
   9  -8 -10    4.14    1.50 
  -1   9 -10    3.92    1.44 
  -9   8 -10    3.88    1.63 
   8   1 -10    5.40    1.72 
  -8  -1 -10    3.54    1.47 
  -1   9  10    4.34    1.39 
  -1   9  10    2.11    1.47 
   1  -9  10    6.45    1.90 
  -8  -1  10    3.92    1.55 
  -9   8  10    4.15    1.49 
   9  -9 -10   16.65    2.72 
   0   9 -10   20.22    2.58 
   0  -9 -10   19.99    2.64 
  -9   0 -10   24.31    2.71 
   9   0 -10   18.81    2.90 
  -9   9 -10   23.17    3.07 
   0   9  10   23.94    3.20 
   0  -9  10   23.88    3.03 
  -9   9  10   18.71    2.61 
  -9   0  10   23.99    2.97 
   1   9 -10    3.18    1.47 
  -1  -9 -10    1.92    1.57 
   9 -10 -10    1.50    1.52 
  10  -1 -10    2.07    1.95 
  -9  10 -10    2.10    1.37 
 -10   1 -10    1.31    1.27 
  -9  10  10    0.90    1.47 
  -1  -9  10    2.70    1.71 
 -10   1  10    1.71    1.49 
   1   9  10    0.85    1.47 
  -2  -8 -10    9.40    2.05 
 -10   2 -10   10.81    2.20 
   2   8 -10    8.79    1.91 
   8 -10 -10   13.04    2.58 
  -8  10 -10    5.70    1.85 
  10  -2 -10    5.74    2.27 
  -8  10  10   12.23    2.24 
 -10   2  10   13.66    2.42 
  -2  -8  10    7.17    2.02 
   2   8  10   10.96    2.20 
  10  -3 -10    3.86    1.85 
   7 -10 -10    4.46    1.73 
  -3  -7 -10    4.51    1.58 
   3   7 -10    6.04    1.73 
  -7  10 -10    3.75    1.64 
 -10   3 -10    4.71    1.64 
  -7  10  10    7.07    1.82 
 -10   3  10    4.33    1.64 
   3   7  10    4.66    1.62 
  -3  -7  10    4.87    1.90 
  -6  10 -10   13.91    2.42 
   4   6 -10   10.94    2.05 
  -4  -6 -10   13.17    2.14 
   6 -10 -10   11.16    2.26 
  10  -4 -10   13.82    2.32 
 -10   4 -10   16.82    2.49 
   4   6  10   14.35    2.31 
  -4  -6  10   11.87    2.38 
  -6  10  10   12.52    2.16 
 -10   4  10   11.03    2.05 
 -10   5 -10   16.33    2.54 
  10  -5 -10   13.31    2.37 
  -5  10 -10   13.35    2.28 
   5 -10 -10   18.01    2.52 
   5   5 -10   14.50    2.18 
   5 -10 -10   15.24    2.25 
  -5  -5 -10   14.96    2.25 
  -5  10  10   14.88    2.29 
  -5  -5  10   12.66    2.31 
   5   5  10   16.81    2.39 
   4 -10 -10    8.38    1.86 
 -10   6 -10   10.05    2.16 
  -4  10 -10    8.60    1.68 
   6   4 -10    5.33    1.59 
  10  -6 -10    8.75    2.05 
   4 -10 -10    8.02    1.94 
  -6  -4 -10    6.06    1.58 
  -6  -4  10    6.68    1.92 
  -4  10  10    5.36    1.54 
   6   4  10    5.84    1.75 
 -10   6  10    7.38    1.67 
   4 -10  10    6.76    1.92 
  10  -7 -10    3.87    1.79 
   3 -10 -10    1.61    1.29 
   7   3 -10    4.34    1.50 
  -3  10 -10    4.98    1.48 
 -10   7 -10    3.34    1.58 
  -3  10  10    3.64    1.83 
   3 -10  10    2.24    1.50 
 -10   7  10    3.91    1.43 
  -3  10  10    5.97    1.59 
  -7  -3  10    5.35    1.61 
   8   2 -10   24.79    3.05 
   2 -10 -10   14.95    2.30 
 -10   8 -10   26.28    3.21 
  10  -8 -10   21.22    2.86 
  -2  10 -10   24.44    2.76 
 -10   8  10   24.26    2.80 
  -2  10  10   20.45    2.52 
  -8  -2  10   19.09    2.73 
   2 -10  10   23.16    3.11 
  -2  10  10   16.09    2.75 
   1 -10 -10    6.36    1.83 
  10  -9 -10    4.86    1.71 
 -10   9 -10    5.11    1.93 
  -1  10 -10    5.00    1.59 
   9   1 -10    5.23    1.90 
  -1  10  10    8.93    2.30 
   1 -10  10    7.99    2.17 
 -10   9  10    5.85    1.87 
  -9  -1  10    8.87    2.07 
 -10   0 -10    3.45    1.50 
  10   0 -10    6.23    2.19 
   0 -10  10    1.49    1.66 
  11  -3 -10    2.43    2.01 
  -8  11 -10    1.79    1.55 
 -11   3  10    3.51    1.71 
   3   8  10    2.29    1.75 
  -7  11 -10   17.11    2.71 
  11  -4 -10   27.37    3.41 
   7 -11 -10   21.41    2.96 
 -11   4 -10   17.84    3.05 
  -4  -7 -10   24.42    2.87 
 -11   4  10   21.57    2.90 
  -4  -7  10   21.39    2.84 
   4   7  10   18.73    2.70 
  11  -5 -10    3.20    1.68 
   5   6 -10    4.57    1.51 
   6 -11 -10    6.51    1.86 
 -11   5 -10    1.64    1.54 
  -5  -6 -10    2.35    1.36 
  -6  11 -10    3.75    1.68 
  -6  11  10    1.64    1.34 
   5   6  10    4.56    1.61 
  -5  -6  10    2.54    1.46 
  11  -6 -10    1.21    1.59 
  -6  -5 -10    2.52    1.39 
   5 -11 -10    3.43    1.55 
   5 -11 -10    0.72    1.31 
   6   5 -10    1.85    1.34 
 -11   6 -10    1.98    1.69 
   6   5  10    2.94    1.58 
  -5  11  10    3.01    1.44 
  -6  -5  10    3.71    1.71 
   5 -11  10    3.61    1.81 
   4 -11 -10    9.81    2.00 
   7   4 -10   17.75    2.51 
  11  -7 -10   19.87    2.99 
   4 -11 -10   10.77    2.41 
   4 -11  10   11.92    2.43 
 -11   7  10   17.99    2.51 
  -4  11  10   14.11    2.30 
   7   4  10   11.20    2.24 
   3 -11 -10    4.01    1.60 
  -3  11 -10    0.46    1.17 
   3 -11  10    1.47    1.65 
  -3  11  10    2.57    1.45 
 -11   8  10    4.50    1.57 
   0   0 -11    0.44    0.58 
   0   0 -11   -0.14    0.69 
   0   0  11   -0.38    0.85 
  -1   1 -11   31.31    2.54 
  -1   0 -11   29.23    1.85 
  -1   0 -11   29.20    2.13 
   1  -1 -11   30.22    2.17 
   0  -1 -11   29.22    2.17 
  -1   1 -11   28.82    2.00 
   0   1 -11   31.07    2.21 
   1   0 -11   29.82    2.19 
   0  -1 -11   29.51    1.79 
  -1   0  11   27.67    2.05 
  -1   1  11   26.69    1.81 
   0   1  11   31.65    2.35 
   1   0  11   23.76    2.15 
   0  -1  11   32.56    2.20 
   0  -1  11   32.30    2.09 
  -1   0  11   27.72    1.93 
   2  -1 -11    1.94    0.96 
  -1  -1 -11    2.00    1.03 
  -2   1 -11    1.99    0.95 
  -1  -1 -11    2.96    0.81 
   1  -2 -11    1.92    1.01 
  -1   2 -11    2.32    0.97 
   1  -2 -11    2.29    0.62 
  -2   1 -11    1.99    0.90 
  -1   2 -11    0.72    0.88 
   1   1 -11    2.39    1.02 
  -2   1  11    2.40    0.82 
  -1   2  11    0.90    0.64 
  -1  -1  11    2.77    1.02 
  -1   2  11    2.17    1.02 
  -1  -1  11    1.35    0.88 
  -2   1  11    1.72    0.94 
   1   1  11    1.47    1.07 
   2  -2 -11   10.66    1.55 
   0   2 -11    7.35    1.44 
  -2   2 -11    8.65    1.46 
  -2   0 -11   10.06    1.34 
   2  -2 -11   11.68    1.20 
   0  -2 -11   10.44    1.63 
  -2   2 -11   11.99    1.66 
  -2   0 -11   11.25    1.68 
   0  -2 -11   10.68    1.19 
   2   0 -11   10.65    1.66 
   0   2  11   12.92    1.81 
  -2   0  11   10.56    1.57 
  -2   2  11    7.51    1.37 
  -2   0  11    9.35    1.43 
  -2   2  11   12.45    1.38 
   0  -2  11   11.72    1.64 
   3  -1 -11   38.94    1.94 
  -3   1 -11   40.71    2.40 
   2  -3 -11   40.42    2.04 
   1   2 -11   35.27    2.35 
  -2   3 -11   34.83    2.34 
   3  -1 -11   34.08    2.39 
   2  -3 -11   39.21    2.63 
  -2   3 -11   37.49    2.53 
  -3   1 -11   38.44    2.33 
  -1  -2 -11   40.28    2.50 
  -3   1  11   38.22    2.30 
  -2   3  11   38.29    2.51 
  -3   1  11   41.19    2.38 
  -1  -2  11   37.15    2.52 
  -1  -2  11   42.78    2.40 
   1   2  11   38.97    2.54 
  -2  -1 -11   26.46    2.35 
   1  -3 -11   30.07    1.79 
  -2  -1 -11   31.14    1.96 
   3  -2 -11   33.78    1.86 
   1  -3 -11   34.97    2.46 
  -1   3 -11   36.05    2.38 
   2   1 -11   27.41    2.45 
  -3   2 -11   34.58    2.24 
   3  -2 -11   32.02    2.24 
  -1   3 -11   36.02    2.42 
  -3   2 -11   31.70    2.27 
  -3   2  11   31.93    2.26 
  -2  -1  11   34.35    2.25 
   2   1  11   28.38    2.52 
  -3   2  11   33.67    1.94 
  -2  -1  11   30.77    2.21 
  -1   3  11   31.54    2.74 
  -3   3 -11    1.38    0.90 
   0  -3 -11    4.00    1.21 
   3  -3 -11    2.88    1.11 
   0   3 -11    2.72    1.01 
  -3   3 -11    3.26    1.18 
   3   0 -11    2.68    1.11 
  -3   0 -11    3.25    0.90 
  -3   0 -11    3.18    1.12 
   3  -3 -11    3.78    0.88 
   0  -3  11    1.34    0.92 
   0   3  11    3.21    0.86 
  -3   3  11    2.43    1.03 
  -3   0  11    1.50    0.92 
  -3   0  11    1.02    0.89 
   0   3  11    0.70    0.95 
   3  -4 -11   37.97    2.25 
   4  -1 -11   31.96    2.00 
  -3   4 -11   34.14    2.53 
   4  -1 -11   34.66    2.40 
  -1  -3 -11   36.55    2.43 
  -4   1 -11   32.73    2.27 
   1   3 -11   38.10    2.47 
   3  -4 -11   31.82    2.77 
  -3   4 -11   32.94    2.27 
  -4   1 -11   34.90    2.33 
  -1  -3  11   33.90    2.12 
  -1  -3  11   36.51    2.60 
  -3   4  11   37.27    2.59 
  -4   1  11   39.00    2.33 
   1   3  11   38.26    2.70 
  -4   1  11   32.21    2.21 
   1   3  11   32.40    2.01 
   4  -2 -11   -0.13    0.87 
   2   2 -11    0.89    0.85 
  -4   2 -11    1.33    0.89 
  -2   4 -11   -0.35    0.79 
  -4   2 -11    0.68    0.75 
  -2  -2 -11    0.16    0.75 
   2  -4 -11   -0.05    0.67 
   2  -4 -11    0.90    0.99 
  -2   4 -11    1.13    0.84 
   4  -2 -11    0.33    0.66 
  -4   2  11    0.55    0.84 
  -2  -2  11    0.51    0.79 
  -2  -2  11    0.71    0.99 
   2   2  11    0.98    0.98 
  -2   4  11   -0.65    0.86 
  -4   2  11    0.22    0.67 
  -3  -1 -11   13.00    1.53 
  -1   4 -11   12.34    1.74 
   3   1 -11   13.13    1.80 
  -4   3 -11   12.91    1.60 
  -4   3 -11   14.14    1.87 
   1  -4 -11   14.22    1.89 
  -3  -1 -11   13.42    1.74 
   4  -3 -11   12.59    1.73 
   4  -3 -11   10.77    1.42 
   3   1  11   11.77    1.79 
  -3  -1  11   13.34    1.57 
  -4   3  11   13.77    1.45 
  -1   4  11   15.17    1.93 
  -4   3  11   15.03    1.78 
  -3  -1  11    8.67    1.57 
   1  -4  11   13.90    1.98 
  -1   4  11   14.44    1.69 
   4   0 -11    4.92    1.30 
   0  -4 -11    8.51    1.54 
   4  -4 -11    8.96    1.38 
  -4   4 -11    7.35    1.60 
  -4   0 -11    6.98    1.30 
   4  -4 -11    5.53    1.32 
  -4   4 -11    8.89    1.42 
   0   4 -11    9.68    1.54 
  -4   0 -11    9.35    1.58 
   0  -4  11    8.07    1.65 
  -4   0  11    6.90    1.24 
   0   4  11    8.50    1.34 
   0   4  11    6.76    1.48 
  -4   4  11    8.04    1.48 
  -4   0  11    7.82    1.47 
  -5   1 -11    1.45    0.92 
  -4   5 -11    0.36    0.79 
  -4   5 -11    0.74    1.03 
   4  -5 -11    1.26    0.94 
  -1  -4 -11    1.43    1.00 
   1   4 -11    0.78    0.89 
   5  -1 -11    1.19    0.88 
   5  -1 -11    0.52    0.85 
  -5   1 -11    0.33    0.78 
   4  -5 -11    2.58    1.21 
  -5   1  11    1.65    1.02 
  -1  -4  11   -0.42    0.93 
   1   4  11    0.99    0.98 
   1   4  11   -0.20    0.73 
  -5   1  11    1.51    0.88 
  -4   5  11    1.94    1.06 
  -5   2 -11   21.97    2.22 
   3  -5 -11   20.55    2.27 
  -2  -3 -11   25.22    2.32 
   5  -2 -11   22.24    2.21 
   3  -5 -11   27.31    2.08 
   2   3 -11   22.07    2.25 
  -3   5 -11   23.58    2.46 
  -3   5 -11   21.75    2.10 
   5  -2 -11   26.27    2.27 
  -5   2 -11   22.94    2.05 
  -3   5  11   20.82    2.15 
  -5   2  11   23.48    2.15 
  -2  -3  11   23.46    2.56 
  -5   2  11   21.92    2.06 
   2   3  11   24.60    2.47 
  -2   5 -11   17.99    1.96 
  -2   5 -11   14.49    1.97 
  -5   3 -11   17.17    2.10 
   2  -5 -11   13.75    1.88 
   5  -3 -11   21.82    2.06 
   5  -3 -11   18.51    1.99 
  -5   3 -11   17.26    1.77 
  -3  -2 -11   15.70    1.83 
   2  -5 -11   17.19    1.87 
   3   2 -11   16.14    1.99 
   3   2  11   17.05    2.17 
  -5   3  11   17.37    1.94 
  -3  -2  11   20.53    2.37 
  -5   3  11   18.32    1.80 
  -2   5  11   15.29    1.98 
  -4  -1 -11    0.94    0.95 
   4   1 -11    1.60    0.93 
   5  -4 -11    1.24    1.03 
   5  -4 -11    1.79    0.96 
  -4  -1 -11    0.80    0.74 
  -1   5 -11    2.45    1.10 
  -5   4 -11    1.18    0.82 
   1  -5 -11    0.82    0.97 
  -5   4 -11    0.72    0.91 
  -4  -1  11    0.83    1.05 
  -1   5  11    2.31    1.05 
  -5   4  11    0.90    0.95 
   1  -5  11    0.67    1.06 
  -1   5  11    1.19    1.04 
  -5   5 -11   26.79    2.21 
   5   0 -11   24.26    2.19 
   5  -5 -11   20.94    2.19 
  -5   0 -11   19.28    2.11 
  -5   0 -11   26.13    2.35 
   5  -5 -11   20.53    2.11 
   0   5 -11   25.89    2.50 
  -5   5 -11   19.28    2.30 
   5   0 -11   22.47    2.29 
   0  -5 -11   26.71    2.56 
   0  -5  11   18.35    2.37 
  -5   0  11   23.18    2.40 
   0   5  11   20.89    2.14 
   0   5  11   22.52    2.47 
  -5   5  11   19.63    2.13 
  -5   6 -11   26.70    2.91 
   5  -6 -11   29.36    2.67 
  -6   1 -11   30.70    2.62 
  -6   1 -11   30.90    2.74 
  -5   6 -11   29.79    2.16 
   6  -1 -11   36.11    2.51 
   5  -6 -11   24.37    2.52 
   6  -1 -11   27.57    2.53 
  -1  -5 -11   25.91    2.52 
   1   5 -11   30.67    2.76 
   1   5  11   22.13    2.39 
   1   5  11   23.25    2.36 
  -5   6  11   27.98    2.64 
  -6   1  11   27.33    2.60 
  -1  -5  11   35.54    3.32 
   2   4 -11    8.29    1.57 
   6  -2 -11    7.78    1.43 
  -6   2 -11    7.01    1.50 
   4  -6 -11    9.70    1.71 
  -4   6 -11    7.32    1.75 
  -4   6 -11    8.81    1.46 
   4  -6 -11    7.63    1.51 
  -6   2 -11    6.02    1.39 
  -2  -4 -11    6.79    1.36 
   6  -2 -11    6.52    1.46 
  -4   6  11   10.75    1.84 
  -6   2  11    6.95    1.39 
   2   4  11   10.65    1.63 
  -2  -4  11    9.72    1.80 
   2   4  11    5.92    1.49 
  -6   2  11    8.50    1.33 
   6  -3 -11   -0.94    0.77 
   3   3 -11    1.76    1.10 
  -3  -3 -11   -0.38    0.74 
  -6   3 -11   -0.72    0.87 
   3  -6 -11    0.16    0.83 
   6  -3 -11    1.12    0.89 
  -3   6 -11   -1.15    0.79 
  -3   6 -11    0.64    0.90 
   3  -6 -11   -0.96    0.83 
  -6   3  11   -0.44    0.78 
  -3  -3  11   -1.01    0.83 
  -3   6  11   -0.12    0.74 
   3   3  11    0.36    0.94 
  -6   3  11   -0.68    0.75 
   2  -6 -11   24.01    2.40 
   6  -4 -11   18.80    2.07 
   6  -4 -11   23.58    2.35 
  -2   6 -11   25.38    2.45 
  -4  -2 -11   19.21    2.11 
  -6   4 -11   19.93    2.28 
   4   2 -11   20.36    2.30 
  -2   6  11   23.29    2.39 
  -6   4  11   19.80    2.14 
   2  -6  11   20.29    2.36 
   4   2  11   26.72    2.66 
  -4  -2  11   19.24    2.37 
  -2   6  11   21.12    2.25 
   5   1 -11   22.62    2.31 
   1  -6 -11   26.41    2.51 
  -1   6 -11   19.66    2.15 
  -5  -1 -11   20.70    2.10 
  -5  -1 -11   24.65    2.34 
   6  -5 -11   20.20    2.23 
   6  -5 -11   24.70    2.40 
  -6   5 -11   21.68    2.51 
   1  -6  11   26.53    2.91 
  -1   6  11   18.26    2.26 
  -5  -1  11   18.51    2.23 
  -1   6  11   23.79    2.46 
  -6   5  11   23.48    2.43 
   6   0 -11    1.04    1.01 
  -6   6 -11    1.18    1.04 
   0  -6 -11    0.71    0.92 
   6  -6 -11    2.59    1.21 
  -6   0 -11    1.58    1.02 
   6  -6 -11    2.77    1.22 
   0   6 -11    2.40    1.17 
  -6   0 -11    1.61    0.99 
   6   0 -11   -0.45    1.14 
   0   6  11    2.07    1.08 
   0   6  11    0.84    0.99 
   0  -6  11   -0.22    1.18 
  -6   6  11    2.59    1.17 
  -6   0  11    2.14    1.14 
  -1  -6 -11   21.13    2.39 
   6  -7 -11   25.63    2.74 
  -6   7 -11   18.85    2.55 
   7  -1 -11   22.53    2.44 
   7  -1 -11   18.06    2.06 
   6  -7 -11   17.31    2.20 
   1   6 -11   19.45    2.32 
  -7   1 -11   18.32    2.22 
   1   6  11   17.24    2.27 
  -6   7  11   16.66    2.21 
   1   6  11   19.32    2.32 
  -1  -6  11   19.83    2.57 
  -7   1  11   19.38    2.46 
  -7   2 -11    0.16    0.92 
   5  -7 -11    0.57    1.06 
   2   5 -11    0.11    0.96 
   5  -7 -11    1.26    1.10 
   7  -2 -11   -0.19    0.84 
  -5   7 -11   -0.55    0.78 
  -5   7 -11   -0.89    0.83 
   7  -2 -11   -1.38    0.94 
  -2  -5 -11   -0.03    0.92 
  -7   2  11    0.30    0.99 
  -5   7  11   -0.36    0.98 
  -2  -5  11    1.66    1.23 
   2   5  11   -0.60    0.94 
   2   5  11   -0.02    0.95 
   7  -3 -11    7.90    1.47 
  -7   3 -11    6.85    1.60 
   7  -3 -11    7.08    1.60 
   4  -7 -11    8.26    1.65 
   3   4 -11    6.19    1.41 
   4  -7 -11    6.80    1.62 
  -3  -4 -11    6.36    1.44 
  -4   7 -11    6.68    1.37 
  -4   7 -11    7.71    1.65 
   3   4  11    7.18    1.63 
  -7   3  11    6.92    1.36 
   3   4  11    9.13    1.59 
  -4   7  11    8.30    1.67 
  -7   3  11    8.56    1.52 
  -3  -4  11    7.43    1.70 
  -7   4 -11   20.91    2.39 
   3  -7 -11   22.93    2.43 
  -3   7 -11   17.22    2.03 
  -3   7 -11   20.23    2.55 
   7  -4 -11   21.34    2.39 
  -4  -3 -11   18.49    2.15 
   3  -7 -11   21.24    2.38 
   4   3 -11   18.35    2.17 
   4   3  11   21.13    2.39 
  -7   4  11   22.75    2.26 
  -3   7  11   21.90    2.46 
  -4  -3  11   16.21    2.23 
   5   2 -11    1.05    1.03 
  -5  -2 -11    1.65    1.04 
   2  -7 -11    0.00    0.89 
  -7   5 -11    0.34    1.01 
   7  -5 -11   -0.04    0.94 
  -2   7 -11    2.77    1.14 
  -2   7  11    1.26    1.06 
  -5  -2  11   -0.01    0.97 
  -7   5  11    0.70    0.98 
  -2   7  11    0.22    1.01 
   5   2  11    0.93    1.23 
   2  -7  11   -0.73    0.94 
  -1   7 -11   15.35    2.11 
   7  -6 -11   12.65    1.97 
  -6  -1 -11   13.79    1.79 
  -6  -1 -11   12.84    1.78 
   6   1 -11   14.78    2.00 
  -7   6 -11   13.48    2.19 
   1  -7 -11   13.29    1.99 
  -1   7  11   12.79    2.06 
  -7   6  11   11.75    1.89 
   1  -7  11   13.98    2.23 
  -6  -1  11   12.22    1.95 
  -1   7  11   13.11    2.01 
  -7   0 -11    8.13    1.64 
   0  -7 -11    8.80    1.74 
  -7   7 -11    9.66    1.96 
   7   0 -11   11.43    1.77 
   7  -7 -11    9.33    1.84 
   7   0 -11   11.94    2.03 
   0   7 -11   12.08    1.95 
  -7   7  11    7.56    1.73 
  -7   0  11    9.48    1.88 
   0   7  11   10.23    1.79 
   0  -7  11   10.79    2.26 
   0   7  11    6.63    1.74 
   7  -8 -11    1.96    1.32 
  -7   8 -11    2.08    1.23 
   8  -1 -11    1.16    1.63 
  -8   1 -11    0.88    1.04 
  -1  -7 -11   -0.09    1.00 
   1   7 -11    0.66    0.97 
   1   7  11    0.17    1.05 
  -7   8  11   -0.19    1.10 
   1   7  11    0.89    1.24 
  -8   1  11    1.88    1.24 
  -1  -7  11    0.91    1.27 
   6  -8 -11   18.82    2.48 
   8  -2 -11   12.72    2.17 
   2   6 -11   11.32    1.95 
  -8   2 -11   11.82    1.96 
  -6   8 -11   12.13    2.07 
  -2  -6 -11   15.96    2.20 
   2   6  11   11.02    1.86 
  -6   8  11   14.63    2.15 
  -8   2  11    9.74    1.78 
  -2  -6  11   14.00    2.32 
   2   6  11   11.99    2.06 
  -3  -5 -11   13.84    1.98 
   3   5 -11   10.72    1.94 
   5  -8 -11   11.92    2.05 
   5  -8 -11   10.63    1.82 
  -8   3 -11   11.07    1.98 
   8  -3 -11   11.36    2.05 
  -5   8 -11    8.37    1.80 
   3   5  11   13.28    2.03 
  -5   8  11   19.02    2.41 
  -8   3  11   15.94    2.04 
   3   5  11   13.02    1.95 
  -3  -5  11    9.81    2.04 
  -8   4 -11    1.67    1.24 
  -4   8 -11    2.17    1.23 
  -4  -4 -11   -0.61    0.90 
   8  -4 -11   -0.07    1.03 
   4  -8 -11    1.86    1.26 
  -4   8 -11    0.80    0.93 
   4   4 -11    2.26    1.16 
   4  -8 -11   -0.65    0.93 
  -4   8  11    2.81    1.31 
  -8   4  11    3.09    1.20 
   4   4  11    1.59    1.19 
  -4  -4  11    1.95    1.22 
   4   4  11    2.27    1.20 
   3  -8 -11   15.04    2.13 
  -3   8 -11   14.99    1.95 
   5   3 -11   18.11    2.30 
  -8   5 -11   13.67    2.12 
  -5  -3 -11   17.52    2.20 
   8  -5 -11   13.57    2.06 
  -3   8  11   16.62    2.22 
  -3   8  11   14.32    2.17 
  -8   5  11   16.54    2.13 
   5   3  11   18.30    2.32 
   3  -8  11   16.83    2.42 
  -5  -3  11   14.47    2.27 
   8  -6 -11    5.61    1.64 
  -8   6 -11    8.23    1.93 
   2  -8 -11    8.20    1.67 
   6   2 -11    6.20    1.43 
  -2   8 -11    9.31    1.66 
  -6  -2 -11    7.39    1.52 
  -2   8  11    8.06    1.86 
   6   2  11    9.32    1.84 
  -8   6  11   11.41    1.79 
   2  -8  11    5.97    1.83 
  -6  -2  11    7.56    1.80 
  -2   8  11   10.18    1.83 
  -8   7 -11   -2.04    0.84 
  -1   8 -11   -0.34    0.90 
   7   1 -11   -1.19    0.77 
   8  -7 -11    0.12    1.09 
   1  -8 -11    0.59    1.10 
  -1   8  11   -1.13    0.98 
  -1   8  11   -0.84    0.96 
   1  -8  11   -0.08    1.36 
  -7  -1  11    0.59    1.09 
  -8   7  11   -0.27    1.07 
  -8   8 -11    7.41    1.81 
   0  -8 -11    8.31    1.80 
  -8   0 -11    9.91    1.90 
   0   8 -11    8.10    1.69 
   8  -8 -11    9.21    1.96 
   8   0 -11    7.84    1.99 
   0  -8  11    8.81    2.04 
   0   8  11    9.59    1.83 
  -8   0  11   10.87    2.14 
   0   8  11    6.65    1.88 
  -8   8  11    7.87    1.88 
  -9   1 -11    6.66    1.65 
   9  -1 -11    6.27    2.07 
   1   8 -11    9.93    1.90 
   8  -9 -11    7.35    1.97 
  -8   9 -11    7.91    2.04 
  -1  -8 -11    9.64    1.97 
  -1  -8  11    7.78    2.05 
  -8   9  11    9.65    2.20 
  -9   1  11    9.28    1.93 
   1   8  11    3.99    1.68 
   2   7 -11   19.75    2.58 
  -7   9 -11   11.77    2.22 
  -9   2 -11   13.05    2.17 
  -2  -7 -11   12.77    2.05 
   7  -9 -11   12.21    2.33 
   9  -2 -11   17.53    2.55 
  -2  -7  11    9.72    2.14 
  -7   9  11   11.04    2.03 
   2   7  11   10.68    1.97 
  -9   2  11   10.25    2.04 
  -3  -6 -11    1.12    1.19 
  -6   9 -11    0.39    0.97 
   9  -3 -11    0.28    1.39 
  -9   3 -11    2.68    1.32 
   6  -9 -11    1.06    1.26 
   3   6 -11    1.24    1.25 
   3   6  11   -0.13    1.22 
  -6   9  11    0.15    1.01 
  -9   3  11    0.04    1.10 
  -3  -6  11    1.77    1.55 
   4   5 -11   16.06    2.32 
   9  -4 -11   15.25    2.35 
  -4  -5 -11   15.98    2.17 
   5  -9 -11   17.24    2.29 
  -9   4 -11   14.99    2.29 
  -5   9 -11   12.77    2.20 
   5  -9 -11   14.15    2.28 
  -4  -5  11   13.03    2.32 
  -5   9  11   14.25    2.18 
   4   5  11   12.58    1.99 
  -9   5 -11   23.54    2.88 
  -5  -4 -11   19.90    2.43 
  -4   9 -11   20.82    2.79 
   9  -5 -11   18.38    2.56 
  -4   9 -11   20.83    2.29 
   4  -9 -11   18.99    2.40 
   5   4 -11   15.33    2.23 
   4  -9 -11   16.89    2.50 
   4  -9  11   22.29    2.80 
  -5  -4  11   15.30    2.34 
  -4   9  11   16.82    2.34 
  -9   5  11   18.52    2.28 
   3  -9 -11   -0.06    1.07 
  -3   9 -11   -0.26    0.95 
   6   3 -11   -1.29    0.86 
   9  -6 -11    0.78    1.22 
  -6  -3 -11    0.75    1.05 
  -9   6 -11    1.04    1.23 
  -6  -3  11    1.51    1.18 
  -3   9  11    1.66    1.16 
   3  -9  11   -0.26    1.19 
  -3   9  11    0.19    1.33 
  -9   6  11   -1.18    0.97 
   9  -7 -11    6.86    1.84 
   7   2 -11    7.01    1.60 
   2  -9 -11    7.00    1.78 
  -2   9 -11    6.74    1.65 
  -9   7 -11    8.02    1.96 
  -2   9  11   10.11    1.93 
   2  -9  11    7.93    1.99 
  -2   9  11    9.35    2.14 
  -9   7  11    7.98    1.77 
  -7  -2  11    7.43    1.98 
  -9   8 -11   15.81    2.49 
  -1   9 -11    8.29    1.78 
   9  -8 -11   13.41    2.47 
   1  -9 -11   11.15    2.12 
  -1   9  11   13.27    2.49 
  -1   9  11   11.29    2.07 
  -9   8  11   15.88    2.40 
  -8  -1  11   11.21    2.12 
   1  -9  11   10.37    2.33 
   0  -9 -11    1.55    1.38 
   9  -9 -11   -0.91    1.24 
   9   0 -11    0.67    1.59 
   0   9 -11    0.15    1.06 
  -9   9 -11    2.59    1.40 
  -9   0 -11    0.70    1.19 
  -9   9  11    2.74    1.43 
   0  -9  11    0.03    1.33 
  -9   0  11    1.71    1.37 
   0   9  11    1.85    1.57 
 -10   1 -11    5.78    1.85 
  10  -1 -11    7.56    2.40 
   1   9  11    8.06    2.20 
  -8  10 -11    3.63    1.61 
 -10   2 -11    0.71    1.27 
   8 -10 -11   -0.37    1.40 
  10  -2 -11    0.93    1.73 
   2   8 -11   -0.33    1.17 
  -2  -8 -11    1.30    1.33 
   2   8  11   -0.69    1.25 
  -2  -8  11   -1.23    1.47 
 -10   2  11    1.01    1.44 
  -8  10  11    0.65    1.44 
  -3  -7 -11   14.13    2.27 
 -10   3 -11   13.93    2.31 
   7 -10 -11   16.49    2.59 
  10  -3 -11   18.70    2.87 
   3   7 -11   12.45    2.18 
  -7  10 -11   15.25    2.47 
   3   7  11   14.73    2.43 
 -10   3  11   17.95    2.57 
  -3  -7  11   14.79    2.59 
  -7  10  11   14.96    2.49 
   4   6 -11    8.93    1.96 
  10  -4 -11   10.88    2.35 
  -4  -6 -11    2.62    1.36 
  -6  10 -11    6.55    1.88 
   6 -10 -11    7.99    2.09 
 -10   4 -11    6.60    1.83 
  -4  -6  11    8.95    2.19 
   4   6  11    6.18    1.86 
  -6  10  11    9.91    2.00 
  -5  10 -11   -0.07    1.24 
  10  -5 -11   -0.82    1.22 
 -10   5 -11    0.90    1.19 
   5   5 -11    0.27    1.09 
   5 -10 -11    0.22    1.19 
   5 -10 -11   -0.43    1.12 
  -5  -5 -11   -0.82    1.01 
   5   5  11   -0.69    1.10 
  -5  10  11    0.24    1.14 
  -5  -5  11    0.39    1.41 
 -10   6 -11    6.62    2.00 
  -4  10 -11    9.89    1.90 
  -6  -4 -11   11.11    2.00 
   4 -10 -11   10.06    2.13 
   6   4 -11   10.67    2.01 
   4 -10 -11   13.70    2.15 
  10  -6 -11   11.58    2.30 
  -6  -4  11    7.93    2.06 
 -10   6  11    8.85    1.90 
  -4  10  11   13.94    2.29 
   4 -10  11   11.90    2.29 
   3 -10 -11   10.47    2.05 
  10  -7 -11    9.98    2.21 
  -3  10 -11    6.98    1.75 
   7   3 -11    6.32    1.67 
 -10   7 -11    8.38    2.05 
   3 -10  11    4.23    1.76 
  -3  10  11   11.28    2.47 
 -10   7  11    6.21    1.72 
  -7  -3  11    6.41    1.93 
  -3  10  11    7.61    1.80 
  -2  10 -11    0.14    1.17 
 -10   8 -11    0.93    1.44 
  10  -8 -11    0.43    1.36 
   2 -10 -11    1.70    1.24 
  -2  10  11    0.24    1.14 
 -10   8  11    0.52    1.27 
  -2  10  11   -1.85    1.35 
  -8  -2  11    0.12    1.43 
   2 -10  11    3.29    1.91 
   1 -10  11    6.97    2.29 
  -1  10  11    8.51    2.38 
  11  -4 -11   -0.02    1.74 
  -7  11 -11    0.19    1.47 
   4   7  11    2.22    1.61 
  -5  -6 -11    3.95    1.58 
  -6  11 -11    1.18    1.57 
  11  -5 -11    2.24    1.71 
   5   6  11    3.34    1.67 
  -6  -5 -11    3.11    1.51 
   5 -11 -11    2.99    1.43 
  11  -6 -11    5.52    2.03 
   6   5 -11    2.88    1.69 
   5 -11  11    0.19    1.47 
  -5  11  11    2.13    1.59 
   4 -11 -11    2.56    1.44 
   7   4 -11    3.11    1.46 
  -4  11  11    0.55    1.37 
   4 -11  11    0.60    1.56 
   0   0 -12   47.91    2.84 
   0   0 -12   51.31    2.53 
   0   0  12   50.54    2.88 
   0   0  12   52.21    2.58 
  -1   1 -12    2.31    0.97 
  -1   0 -12    1.90    0.86 
   1   0 -12   -0.61    0.85 
   0   1 -12    1.24    0.95 
  -1   1 -12    1.76    0.84 
   0  -1 -12   -0.79    0.79 
  -1   0 -12    1.12    0.93 
   1  -1 -12    1.34    0.89 
   0  -1 -12    0.31    0.67 
   0   1  12    1.15    0.98 
   0  -1  12    1.37    0.88 
  -1   0  12    3.72    1.13 
   0  -1  12    1.07    0.97 
  -1   1  12    0.27    0.96 
  -1   0  12    0.77    0.80 
  -1   1  12    1.21    0.77 
   1   0  12    0.17    0.93 
  -1  -1 -12   14.99    1.57 
   1   1 -12   14.68    1.91 
  -1   2 -12   15.36    1.88 
  -2   1 -12   16.61    1.86 
  -1   2 -12   16.75    2.07 
   1  -2 -12   11.64    1.71 
   2  -1 -12   14.69    1.90 
  -1  -1 -12   13.54    1.82 
  -2   1 -12   16.20    1.92 
  -1   2  12   11.84    1.74 
  -1   2  12   14.96    1.52 
  -2   1  12   13.80    1.86 
  -1  -1  12   18.74    2.02 
   1   1  12   15.92    2.01 
  -1  -1  12   13.85    1.79 
  -2   1  12   15.46    1.71 
   0   2 -12   20.64    2.18 
  -2   2 -12   28.46    2.42 
   0  -2 -12   28.50    2.72 
   2  -2 -12   22.62    2.26 
  -2   0 -12   29.75    2.08 
  -2   2 -12   29.97    2.24 
   2   0 -12   22.93    2.36 
  -2   0 -12   23.34    2.20 
  -2   2  12   24.14    2.36 
  -2   0  12   26.53    2.30 
  -2   0  12   20.82    2.09 
   0  -2  12   23.01    2.37 
   0   2  12   25.16    2.52 
   0  -2  12   25.51    2.29 
  -2   2  12   23.67    1.74 
   1   2 -12    2.46    1.14 
  -1  -2 -12    4.38    1.39 
  -2   3 -12    2.67    1.10 
  -3   1 -12    3.85    1.15 
  -3   1 -12    5.26    1.27 
  -2   3 -12    2.22    1.01 
   2  -3 -12    2.07    1.14 
   3  -1 -12    3.11    1.15 
   1   2  12    3.03    1.10 
  -1  -2  12    0.68    0.97 
  -1  -2  12    2.43    1.05 
  -2   3  12    3.08    1.17 
  -3   1  12    2.66    1.04 
  -3   1  12    2.69    1.05 
  -2  -1 -12    1.94    1.17 
   1  -3 -12    1.42    0.97 
   2   1 -12    1.34    0.92 
  -1   3 -12    1.62    1.00 
  -3   2 -12    2.17    1.01 
   3  -2 -12    0.14    0.91 
  -1   3 -12    1.21    1.02 
  -2  -1 -12    1.91    0.85 
  -3   2 -12    2.22    1.05 
   2   1  12    1.39    1.14 
  -2  -1  12    2.12    0.99 
  -2  -1  12    2.51    1.11 
  -1   3  12    3.28    1.29 
  -3   2  12    3.82    1.17 
  -3   2  12    2.46    0.94 
   3   0 -12    7.90    1.58 
  -3   3 -12    8.67    1.64 
  -3   0 -12    9.64    1.62 
   0  -3 -12    5.23    1.29 
  -3   3 -12    8.67    1.50 
   3  -3 -12    6.07    1.21 
   3  -3 -12    9.02    1.52 
   0   3 -12    8.81    1.52 
  -3   0 -12    9.55    1.46 
  -3   0  12    8.73    1.50 
   0  -3  12    7.77    1.58 
  -3   3  12    7.06    1.46 
  -3   0  12    6.27    1.31 
   0   3  12    8.25    1.53 
   4  -1 -12    2.62    1.15 
  -4   1 -12    2.69    1.08 
   3  -4 -12    2.66    0.89 
   1   3 -12    2.96    1.14 
   3  -4 -12    2.17    1.08 
  -3   4 -12    1.37    1.06 
  -1  -3 -12    4.46    1.36 
  -4   1 -12    3.04    1.01 
  -3   4 -12    3.30    1.18 
  -4   1  12    0.35    0.87 
  -4   1  12    3.41    1.19 
  -1  -3  12    2.54    1.23 
   1   3  12    0.97    1.02 
  -3   4  12    2.80    1.13 
  -1  -3  12    2.00    1.02 
  -2   4 -12   45.56    2.80 
   2  -4 -12   42.78    2.89 
  -4   2 -12   36.70    2.54 
  -2  -2 -12   40.20    2.69 
   4  -2 -12   37.27    2.59 
   2  -4 -12   39.88    2.37 
   2   2 -12   44.66    2.84 
  -4   2 -12   46.14    2.68 
  -2   4  12   37.76    2.81 
  -4   2  12   40.84    2.48 
   2   2  12   45.96    3.05 
  -2  -2  12   37.82    2.44 
  -4   2  12   37.85    2.58 
  -2  -2  12   43.65    2.95 
  -3  -1 -12    0.07    1.00 
  -4   3 -12    0.28    0.88 
   4  -3 -12   -0.09    0.89 
  -4   3 -12    0.47    0.94 
   3   1 -12    0.42    0.97 
   1  -4 -12    0.46    0.87 
  -3  -1 -12   -0.50    0.64 
   4  -3 -12   -0.33    0.64 
  -1   4 -12    1.06    0.99 
  -3  -1  12    0.58    0.91 
   1  -4  12    1.40    1.06 
  -3  -1  12    0.88    0.88 
  -1   4  12    0.72    1.03 
  -4   3  12    1.51    1.01 
   3   1  12    1.23    1.13 
  -4   4 -12    6.43    1.38 
   0   4 -12    7.72    1.55 
  -4   4 -12    8.88    1.75 
   0  -4 -12    6.87    1.54 
  -4   0 -12    5.88    1.44 
   4  -4 -12    9.29    1.42 
   4  -4 -12    9.00    1.70 
  -4   0 -12    5.79    1.26 
   4   0 -12    6.39    1.45 
   0   4  12    5.10    1.38 
  -4   4  12    7.47    1.55 
   0  -4  12    7.88    1.59 
  -4   0  12    6.45    1.42 
  -4   0  12    7.89    1.40 
   1   4 -12   17.72    2.14 
  -5   1 -12   18.58    2.11 
  -1  -4 -12   18.73    2.12 
  -5   1 -12   17.62    2.02 
   4  -5 -12   19.90    2.11 
  -4   5 -12   18.29    2.37 
   5  -1 -12   19.29    2.27 
  -4   5 -12   17.71    2.04 
   4  -5 -12   15.77    2.15 
  -5   1  12   19.51    2.06 
  -1  -4  12   18.56    2.50 
   1   4  12   18.02    2.27 
  -4   5  12   16.94    2.13 
  -5   1  12   18.60    2.09 
  -3   5 -12   13.52    2.12 
  -2  -3 -12   12.12    1.89 
   3  -5 -12   15.50    2.12 
  -3   5 -12   11.52    1.80 
  -5   2 -12   10.88    1.72 
   3  -5 -12   10.71    1.60 
   5  -2 -12   13.77    1.92 
   2   3 -12   13.19    2.01 
  -5   2 -12   13.01    1.69 
  -5   2  12   11.91    1.77 
  -2  -3  12   15.21    2.18 
  -3   5  12    9.67    1.68 
   2   3  12   11.91    1.87 
  -5   2  12   13.65    1.75 
  -5   3 -12    4.94    1.25 
  -2   5 -12    1.95    1.06 
   2  -5 -12    2.33    1.03 
   3   2 -12    2.96    1.24 
  -2   5 -12    3.81    1.28 
   5  -3 -12    5.25    1.20 
   2  -5 -12    3.34    1.31 
   5  -3 -12    5.42    1.35 
  -3  -2 -12    3.39    1.16 
  -5   3 -12    2.96    1.21 
  -2   5  12    3.94    1.38 
  -3  -2  12    1.97    1.19 
  -5   3  12    5.71    1.28 
   3   2  12    6.44    1.45 
  -4  -1 -12    6.32    1.41 
  -5   4 -12    7.77    1.74 
   5  -4 -12    9.67    1.49 
  -5   4 -12    7.31    1.35 
  -1   5 -12    9.66    1.65 
  -4  -1 -12    6.28    1.24 
   4   1 -12    7.94    1.58 
   5  -4 -12    8.76    1.61 
   1  -5 -12   12.98    1.96 
   4   1  12   11.76    2.09 
  -4  -1  12    8.00    1.71 
  -1   5  12    6.39    1.60 
  -5   4  12    8.17    1.62 
  -1   5  12    7.87    1.50 
   1  -5  12    9.16    1.78 
   0  -5 -12    5.75    1.39 
  -5   5 -12    6.62    1.64 
   5  -5 -12    6.22    1.39 
   0   5 -12    6.37    1.48 
   5  -5 -12    6.38    1.42 
  -5   5 -12    6.43    1.35 
   5   0 -12    2.63    1.28 
  -5   0 -12    3.33    1.17 
  -5   0 -12    5.70    1.42 
  -5   0  12    5.36    1.53 
  -5   5  12    7.28    1.63 
   0  -5  12    5.20    1.62 
   0   5  12    7.54    1.70 
   0   5  12    6.70    1.42 
  -6   1 -12    0.04    0.86 
  -5   6 -12    0.20    1.11 
  -5   6 -12    2.04    0.97 
  -1  -5 -12   -1.17    0.78 
  -6   1 -12    0.77    0.92 
   5  -6 -12    0.90    1.07 
   5  -6 -12    2.87    1.17 
   1   5 -12    0.71    0.95 
   6  -1 -12    0.26    0.98 
  -1  -5  12   -1.02    0.91 
  -6   1  12    0.21    0.98 
  -5   6  12    0.24    1.01 
   1   5  12   -0.09    0.93 
  -4   6 -12    4.61    1.52 
  -4   6 -12    2.48    1.13 
   4  -6 -12    6.10    1.36 
   4  -6 -12    3.98    1.45 
  -6   2 -12    7.37    1.60 
  -2  -4 -12    6.13    1.44 
   6  -2 -12    5.09    1.35 
   2   4 -12    5.54    1.54 
  -6   2  12    4.33    1.19 
  -6   2  12    3.94    1.32 
  -4   6  12    4.65    1.43 
   2   4  12    5.25    1.50 
  -2  -4  12    5.41    1.69 
  -3  -3 -12   10.02    1.71 
  -3   6 -12   11.60    1.77 
  -6   3 -12   10.99    1.93 
   6  -3 -12   14.26    1.84 
   3  -6 -12    9.83    1.66 
  -3   6 -12    8.83    1.69 
   3   3 -12   12.29    1.97 
   6  -3 -12   10.78    1.71 
   3  -6 -12   13.04    1.95 
  -6   3  12   16.01    1.92 
  -3  -3  12   11.77    2.00 
   3   3  12    9.45    1.71 
  -6   3  12   10.91    1.67 
  -3   6  12    9.90    1.82 
  -2   6 -12    2.31    1.21 
   4   2 -12    1.49    1.18 
   2  -6 -12    4.95    1.43 
  -6   4 -12    2.88    1.16 
   6  -4 -12    4.37    1.20 
   6  -4 -12    2.77    1.22 
  -4  -2 -12    4.86    1.39 
  -2   6  12    1.10    1.11 
  -2   6  12    1.27    1.05 
  -4  -2  12    4.34    1.47 
   4   2  12    3.73    1.42 
  -6   4  12    1.25    1.09 
   2  -6  12    0.39    1.16 
  -1   6 -12    4.84    1.45 
  -5  -1 -12    5.39    1.37 
   6  -5 -12    5.35    1.34 
  -6   5 -12    3.24    1.41 
   1  -6 -12    3.61    1.36 
   6  -5 -12    2.99    1.24 
   5   1 -12    1.63    1.15 
  -6   5  12    3.92    1.28 
   1  -6  12    3.74    1.49 
  -1   6  12    4.89    1.48 
  -5  -1  12    2.62    1.35 
  -1   6  12    4.45    1.33 
  -6   6 -12   22.68    2.80 
   6  -6 -12   25.82    2.56 
   0  -6 -12   21.40    2.48 
   6  -6 -12   27.19    2.68 
   0   6 -12   25.91    2.76 
   6   0 -12   22.12    2.46 
  -6   0 -12   24.98    2.50 
  -6   0 -12   20.41    2.32 
   0   6  12   21.19    2.37 
   0   6  12   18.88    2.48 
   0  -6  12   26.13    3.06 
  -6   0  12   21.43    2.56 
  -6   6  12   20.27    2.37 
   6  -7 -12    4.01    1.39 
   7  -1 -12    5.16    1.48 
   6  -7 -12    5.17    1.51 
  -1  -6 -12    6.94    1.57 
   1   6 -12    2.63    1.21 
  -6   7 -12    5.90    1.63 
  -7   1 -12    4.42    1.37 
   1   6  12    3.93    1.46 
  -6   7  12    3.81    1.39 
   1   6  12    4.48    1.38 
  -1  -6  12    2.01    1.35 
  -7   1  12    3.92    1.39 
   2   5 -12    6.76    1.67 
   7  -2 -12    4.77    1.40 
   7  -2 -12    5.05    1.49 
  -2  -5 -12    4.96    1.43 
  -5   7 -12    4.14    1.37 
  -7   2 -12    5.91    1.59 
   5  -7 -12    4.45    1.43 
   5  -7 -12    6.35    1.71 
  -5   7  12    3.84    1.41 
  -2  -5  12   -0.42    1.22 
   2   5  12    3.63    1.43 
  -7   2  12    5.46    1.53 
   3   4 -12    2.51    1.30 
  -7   3 -12    1.02    1.16 
  -3  -4 -12    2.21    1.16 
   4  -7 -12    2.07    1.10 
  -4   7 -12    2.52    1.21 
  -4   7 -12    3.11    1.28 
   4  -7 -12    3.77    1.33 
   7  -3 -12    3.32    1.24 
   7  -3 -12    3.16    1.27 
  -7   3  12    3.10    1.16 
  -4   7  12    3.36    1.29 
   3   4  12    4.45    1.42 
  -7   3  12    3.38    1.25 
  -3  -4  12    3.07    1.31 
   4   3 -12    6.34    1.58 
   3  -7 -12    3.36    1.22 
  -7   4 -12    0.81    1.13 
  -3   7 -12    2.21    1.35 
   3  -7 -12    2.86    1.27 
  -3   7 -12    1.82    1.19 
  -4  -3 -12    3.76    1.38 
   7  -4 -12    4.11    1.37 
   4   3  12    5.74    1.47 
  -3   7  12    3.20    1.35 
  -4  -3  12    3.92    1.45 
  -7   4  12    2.13    1.08 
  -2   7 -12   15.04    1.98 
   7  -5 -12   11.82    1.88 
   5   2 -12   18.83    2.28 
   2  -7 -12   14.55    2.15 
  -7   5 -12   12.29    2.02 
  -5  -2 -12   14.13    1.97 
  -7   5  12   14.00    1.96 
   5   2  12   19.64    2.43 
  -5  -2  12   20.00    2.64 
   2  -7  12   15.15    2.38 
  -2   7  12   11.81    2.01 
  -2   7  12   15.03    2.22 
  -6  -1 -12    3.64    1.27 
  -1   7 -12    4.26    1.41 
  -7   6 -12    3.69    1.52 
   6   1 -12    4.61    1.42 
   1  -7 -12    3.51    1.31 
   7  -6 -12    3.31    1.21 
  -6  -1  12    3.07    1.52 
   1  -7  12    4.90    1.72 
  -7   6  12    2.65    1.27 
  -1   7  12    1.34    1.24 
  -1   7  12    3.87    1.41 
   0  -7 -12    3.80    1.36 
   0   7 -12    4.51    1.44 
   7  -7 -12   -0.06    1.10 
  -7   0 -12    2.37    1.12 
  -7   7 -12    2.41    1.35 
   7   0 -12    3.23    1.31 
   0  -7  12    2.00    1.47 
   0   7  12    4.98    1.53 
  -7   7  12    2.54    1.42 
   0   7  12    3.68    1.38 
  -7   0  12    1.59    1.35 
   7  -8 -12    8.79    1.83 
  -1  -7 -12   11.75    2.05 
  -8   1 -12    6.71    1.66 
  -7   8 -12    7.10    1.90 
   1   7 -12    7.79    1.73 
  -1  -7  12    8.59    2.25 
   1   7  12   10.05    2.06 
  -8   1  12   13.38    2.25 
   1   7  12   10.47    1.96 
  -7   8  12    7.96    1.94 
  -6   8 -12    4.17    1.69 
   2   6 -12    1.46    1.29 
  -2  -6 -12    1.95    1.22 
  -8   2 -12    3.71    1.29 
   8  -2 -12    7.62    1.86 
   6  -8 -12    4.48    1.61 
  -8   2  12    4.77    1.56 
   2   6  12    5.46    1.62 
  -6   8  12    4.58    1.49 
   2   6  12    6.50    1.75 
  -2  -6  12    2.42    1.60 
   5  -8 -12    0.21    1.14 
  -5   8 -12    1.04    1.28 
  -3  -5 -12    0.66    1.00 
   8  -3 -12   -0.73    1.16 
   5  -8 -12    0.88    1.13 
   3   5 -12    1.17    1.14 
  -8   3 -12    0.87    1.22 
  -3  -5  12    0.69    1.26 
  -8   3  12   -0.54    1.04 
   3   5  12   -0.55    1.17 
  -5   8  12    1.52    1.17 
   8  -4 -12   20.17    2.49 
  -8   4 -12   18.86    2.55 
  -4   8 -12   16.41    2.10 
  -4  -4 -12   13.16    1.94 
   4  -8 -12   21.75    2.63 
   4  -8 -12   18.96    2.44 
   4   4 -12   16.40    2.29 
  -4   8 -12   15.46    2.30 
  -8   4  12   16.63    2.11 
  -4  -4  12   17.18    2.50 
   4   4  12   13.93    2.16 
  -4   8  12   17.69    2.38 
   5   3 -12    6.46    1.69 
  -3   8 -12    3.27    1.35 
  -8   5 -12    6.67    1.82 
   8  -5 -12    3.19    1.38 
   3  -8 -12    3.67    1.43 
  -5  -3 -12    4.50    1.41 
   3  -8 -12    5.55    1.65 
  -3   8  12    6.42    1.65 
  -8   5  12    6.17    1.54 
  -5  -3  12    3.58    1.61 
   3  -8  12    4.32    1.60 
   5   3  12    3.53    1.41 
   6   2 -12    3.02    1.36 
  -8   6 -12    0.68    1.29 
  -6  -2 -12    2.37    1.24 
   8  -6 -12    3.44    1.40 
  -2   8 -12    5.02    1.47 
   2  -8 -12    2.01    1.25 
  -6  -2  12    2.24    1.31 
  -2   8  12    3.89    1.56 
  -8   6  12    2.58    1.28 
  -2   8  12    4.19    1.56 
   6   2  12    3.84    1.57 
   2  -8  12    2.26    1.51 
  -1   8 -12    6.37    1.62 
   8  -7 -12   10.73    2.04 
  -8   7 -12    3.70    1.50 
   1  -8 -12    9.67    1.99 
   7   1 -12    5.93    1.51 
  -1   8  12    5.45    1.61 
   1  -8  12    5.17    1.89 
  -1   8  12    5.60    1.65 
  -7  -1  12    5.86    1.65 
  -8   7  12    7.65    1.82 
   0  -8 -12    0.69    1.26 
   0   8 -12    0.80    1.15 
   8  -8 -12    3.49    1.52 
  -8   8 -12    1.35    1.28 
  -8   0 -12    0.09    1.17 
   0   8  12    0.94    1.22 
  -8   8  12    0.81    1.31 
   0   8  12    1.08    1.19 
  -8   0  12    2.77    1.58 
   0  -8  12    1.69    1.54 
  -9   1 -12    6.70    1.70 
   8  -9 -12    7.05    2.01 
   1   8 -12    1.83    1.36 
  -8   9 -12    4.49    1.80 
  -1  -8 -12    5.76    1.68 
   1   8  12    5.95    1.84 
  -8   9  12    3.92    1.68 
  -1  -8  12    5.01    2.07 
  -9   1  12    6.53    1.89 
  -7   9 -12    5.57    1.81 
   2   7 -12    0.90    1.14 
  -9   2 -12    3.01    1.35 
  -2  -7 -12    5.78    1.62 
   7  -9 -12    0.79    1.41 
  -7   9  12    1.50    1.35 
  -2  -7  12    4.97    1.74 
   2   7  12    1.52    1.50 
  -9   2  12    2.07    1.40 
  -9   3 -12   13.59    2.28 
   3   6 -12   16.91    2.43 
   6  -9 -12   19.51    2.74 
   9  -3 -12   18.01    2.59 
  -3  -6 -12   19.20    2.44 
  -6   9 -12   16.62    2.62 
  -3  -6  12   15.88    2.64 
  -9   3  12   17.92    2.54 
  -6   9  12   17.42    2.46 
  -9   4 -12    1.01    1.36 
  -4  -5 -12    2.75    1.37 
  -5   9 -12   -0.53    1.13 
   5  -9 -12   -0.82    1.09 
   9  -4 -12    4.98    1.59 
   4   5 -12    0.74    1.21 
   5  -9 -12    1.38    1.23 
  -5   9  12    2.41    1.35 
  -4  -5  12    2.80    1.70 
   9  -5 -12    2.03    1.40 
   5   4 -12    3.81    1.51 
  -4   9 -12    3.23    1.32 
  -5  -4 -12    1.86    1.24 
   4  -9 -12    2.48    1.46 
   4  -9 -12    3.85    1.42 
  -9   5 -12    0.53    1.32 
  -5  -4  12    0.47    1.32 
  -4   9  12    2.48    1.32 
   4  -9  12    3.38    1.58 
   9  -6 -12    9.86    1.96 
  -3   9 -12    6.02    1.58 
   3  -9 -12    6.65    1.73 
  -9   6 -12    6.70    1.92 
  -6  -3 -12    5.64    1.54 
   3  -9 -12   10.18    2.13 
   6   3 -12    9.83    1.96 
  -3   9  12    5.14    1.67 
   3  -9  12    5.90    1.86 
  -9   6  12   10.62    2.05 
  -6  -3  12    5.02    1.83 
  -3   9  12    7.85    1.94 
   9  -7 -12    2.27    1.34 
   7   2 -12    0.88    1.22 
  -2   9 -12    1.32    1.30 
  -9   7 -12    2.73    1.48 
   2  -9 -12    2.24    1.32 
  -9   7  12    3.40    1.47 
  -2   9  12    3.01    1.67 
  -7  -2  12    1.09    1.35 
  -2   9  12    2.05    1.38 
   2  -9  12    0.33    1.41 
  -1   9 -12    0.79    1.17 
   1  -9 -12   -0.03    1.30 
  -9   8 -12    0.76    1.33 
   9  -8 -12    3.43    1.67 
  -1   9  12    0.80    1.27 
   1  -9  12   -0.25    1.50 
  -1   9  12   -1.79    1.26 
  -9   8  12    1.90    1.39 
  -8  -1  12    1.48    1.32 
   9  -9 -12   13.14    2.52 
   0   9  12   11.78    2.37 
   0  -9  12    8.95    2.44 
  -9   0  12    9.08    2.24 
   8 -10 -12    1.81    1.64 
 -10   2 -12    2.17    1.54 
   2   8  12    3.13    1.75 
 -10   2  12    5.67    1.96 
 -10   3 -12    0.60    1.25 
  -7  10 -12   -0.42    1.42 
   7 -10 -12   -0.14    1.45 
  10  -3 -12    3.05    1.94 
  -3  -7 -12    0.29    1.12 
 -10   3  12    1.12    1.51 
  10  -4 -12    2.82    1.80 
 -10   4 -12    3.06    1.60 
  -4  -6 -12    4.17    1.62 
   4   6 -12    4.34    1.74 
   6 -10 -12    5.92    1.83 
  -6  10 -12    5.51    1.76 
  -6  10  12    5.85    1.73 
  -4  -6  12    5.03    2.01 
   5 -10 -12    3.58    1.62 
  -5  -5 -12    2.97    1.45 
 -10   5 -12    2.98    1.73 
  10  -5 -12    5.53    1.88 
   5   5 -12    6.02    1.76 
   5 -10 -12    4.77    1.66 
  -5  10 -12    4.03    1.70 
  -5  -5  12    3.31    1.86 
  -5  10  12    4.26    1.54 
   5 -10  12    4.31    1.81 
   4 -10 -12    0.17    1.36 
   4 -10 -12    2.51    1.53 
   6   4 -12    0.04    1.17 
  -4  10 -12    0.03    1.18 
  -6  -4 -12    1.60    1.27 
  10  -6 -12    1.36    1.52 
 -10   6 -12    1.03    1.48 
  -4  10  12    2.03    1.44 
   4 -10  12    1.65    1.60 
  -6  -4  12    1.16    1.56 
   3 -10 -12    3.66    1.53 
  10  -7 -12    7.03    1.90 
  -3  10 -12    5.75    1.61 
   7   3 -12    3.50    1.47 
   3 -10  12    4.99    1.97 
  -3  10  12    0.80    1.59 
  -3  10  12    3.78    1.63 
 -10   7  12    5.30    1.75 
  -2  10 -12    7.34    1.89 
  10  -8 -12   13.20    2.52 
  -2  10  12    8.98    2.32 
 -10   8  12   13.86    2.49 
  -2  10  12   10.15    2.07 
   0   0 -13    0.07    0.86 
   0   0  13   -0.09    0.95 
   0   0  13    0.10    0.75 
  -1   0 -13   16.32    2.00 
  -1   1 -13   14.68    1.89 
  -1   0 -13   12.06    1.64 
   1  -1 -13   14.12    1.93 
   0   1 -13   10.67    1.68 
  -1   1 -13   15.07    1.80 
   0  -1 -13   10.08    1.62 
   1   0 -13   10.33    1.66 
  -1   0  13   12.03    1.67 
  -1   1  13   13.75    1.61 
   0   1  13   12.73    1.54 
   1   0  13   12.64    1.93 
   0   1  13   11.16    1.76 
   1  -1  13    8.95    1.61 
   0  -1  13    9.53    1.57 
  -1   0  13   10.46    1.60 
  -1   1  13   16.08    2.06 
   0  -1  13   12.93    1.82 
  -1   2 -13    0.96    0.90 
  -1  -1 -13    0.61    0.95 
  -1   2 -13    0.24    0.86 
  -1  -1 -13    0.52    0.76 
  -2   1 -13   -0.07    0.82 
  -2   1 -13    2.01    0.91 
   2  -1 -13    0.86    0.94 
   1  -2 -13    0.87    0.97 
   1   1 -13    1.55    0.97 
  -2   1  13   -0.01    1.00 
  -1   2  13    0.68    1.04 
  -1  -1  13    1.85    1.05 
  -1  -1  13    0.63    0.96 
   1   1  13    2.11    1.29 
  -2   1  13    2.07    0.94 
  -2   0 -13   -0.45    0.85 
   0   2 -13    1.20    1.02 
  -2   0 -13   -0.01    0.78 
   2  -2 -13    0.66    0.99 
   0  -2 -13    0.06    0.84 
  -2   2 -13    1.26    0.92 
   2   0 -13    0.70    0.99 
  -2   2 -13    0.62    0.95 
   0   2  13    0.44    0.97 
   0  -2  13    0.41    0.94 
   0  -2  13    1.86    1.15 
  -2   0  13    1.71    1.06 
   2   0  13    2.25    1.37 
  -2   2  13    1.41    1.07 
  -2   0  13    1.31    1.01 
   3  -1 -13   10.55    1.70 
  -3   1 -13   12.55    1.70 
   2  -3 -13   13.01    1.95 
  -2   3 -13   10.28    1.72 
  -3   1 -13   10.91    1.70 
  -1  -2 -13   10.68    1.78 
   1   2 -13   13.81    1.91 
  -2   3 -13   13.30    1.98 
  -1  -2  13   10.36    1.72 
  -3   1  13   11.82    1.65 
  -3   1  13   11.87    1.76 
  -2   3  13    8.61    1.65 
   1   2  13   12.60    1.86 
  -1  -2  13   10.51    1.60 
  -2  -1 -13    6.32    1.58 
  -3   2 -13    5.46    1.32 
  -1   3 -13    6.79    1.53 
  -3   2 -13    8.01    1.49 
   2   1 -13    4.74    1.28 
  -1   3 -13    3.67    1.19 
   3  -2 -13    8.20    1.67 
   1  -3 -13    5.23    1.54 
   2   1  13    8.20    1.72 
  -1   3  13    5.89    1.44 
  -2  -1  13    5.58    1.29 
   1  -3  13    3.21    1.19 
  -3   2  13    6.52    1.45 
  -2  -1  13    8.87    1.66 
  -3   2  13    5.10    1.15 
  -3   3 -13   -1.17    0.88 
   3   0 -13   -0.41    0.79 
   0   3 -13    0.75    0.96 
   0  -3 -13    0.06    1.03 
  -3   0 -13   -0.27    0.77 
   3  -3 -13    0.91    1.02 
  -3   0 -13   -0.50    0.88 
  -3   3 -13   -0.68    0.83 
   0  -3  13   -0.30    0.83 
   0  -3  13    0.14    0.83 
  -3   0  13    0.48    0.94 
   0   3  13    1.04    1.05 
  -3   3  13   -0.26    0.94 
  -3   0  13    1.12    0.98 
   3  -4 -13   23.69    2.66 
  -4   1 -13   25.29    2.42 
  -3   4 -13   19.90    2.45 
   1   3 -13   18.67    2.26 
  -3   4 -13   23.05    2.32 
  -4   1 -13   23.27    2.30 
   4  -1 -13   19.04    2.16 
  -1  -3 -13   21.39    2.32 
   1   3  13   22.94    2.49 
  -1  -3  13   25.18    2.32 
  -4   1  13   23.61    2.36 
  -3   4  13   23.98    2.67 
  -1  -3  13   20.29    2.36 
  -4   1  13   22.83    2.35 
   2   2 -13   -0.01    0.85 
  -2  -2 -13   -0.86    0.88 
  -4   2 -13   -0.47    0.87 
  -2   4 -13    0.63    1.00 
  -4   2 -13   -0.41    0.84 
   2  -4 -13   -0.67    1.07 
  -2   4 -13    0.63    1.02 
   4  -2 -13   -0.22    0.93 
  -2   4  13    0.16    1.08 
  -4   2  13   -0.37    0.89 
   2   2  13   -0.15    1.04 
  -2  -2  13   -0.97    0.85 
  -2  -2  13    0.47    1.13 
  -4   2  13   -0.40    0.74 
   4  -3 -13    1.15    0.99 
  -4   3 -13    2.63    1.22 
  -4   3 -13    1.42    1.02 
  -3  -1 -13    1.77    1.22 
   3   1 -13    3.88    1.39 
  -1   4 -13    2.03    1.10 
   1  -4 -13    1.21    1.24 
  -1   4  13   -0.32    1.02 
   1  -4  13    1.27    1.14 
   3   1  13    4.50    1.55 
  -3  -1  13    0.66    0.98 
  -4   3  13    1.77    1.14 
  -3  -1  13    1.88    1.15 
  -4   0 -13    0.03    0.86 
   4   0 -13    0.95    1.08 
  -4   4 -13    1.58    1.01 
   4  -4 -13    0.06    1.01 
  -4   4 -13    0.63    0.97 
  -4   0 -13    0.79    1.05 
   0   4 -13   -0.24    0.92 
   0  -4 -13    1.37    1.13 
  -4   0  13   -0.76    0.83 
  -4   4  13    0.84    0.94 
  -4   0  13   -0.46    0.89 
   0   4  13    0.82    1.18 
   0  -4  13    0.87    1.12 
  -5   1 -13   -0.10    0.82 
  -4   5 -13   -0.98    0.83 
  -4   5 -13    0.75    1.10 
  -1  -4 -13    0.13    0.97 
   5  -1 -13    0.00    0.94 
  -5   1 -13    0.54    0.95 
   4  -5 -13    0.84    1.12 
   4  -5 -13    1.28    0.97 
   1   4 -13   -0.18    1.00 
  -5   1  13   -1.05    0.85 
  -5   1  13    0.38    0.98 
  -1  -4  13    1.17    1.11 
  -4   5  13    0.70    1.13 
   1   4  13    0.98    1.03 
  -3   5 -13   16.14    2.05 
   5  -2 -13   13.16    1.90 
  -2  -3 -13   15.60    2.14 
   2   3 -13   19.22    2.34 
  -5   2 -13   16.22    2.12 
   3  -5 -13   19.24    2.52 
  -3   5 -13   15.41    2.22 
  -5   2 -13   17.13    2.01 
  -5   2  13   16.56    2.02 
  -5   2  13   20.72    2.28 
  -2  -3  13   13.34    2.09 
   2   3  13   19.79    2.48 
  -3   5  13   15.41    2.19 
  -2   5 -13    3.28    1.37 
  -5   3 -13    7.43    1.63 
  -5   3 -13    4.98    1.25 
   2  -5 -13    3.72    1.36 
  -2   5 -13    5.27    1.44 
  -3  -2 -13    4.58    1.42 
   3   2 -13    5.55    1.58 
   5  -3 -13    7.39    1.59 
   3   2  13    5.49    1.47 
  -2   5  13    4.52    1.42 
  -3  -2  13    2.09    1.23 
  -5   3  13    7.18    1.51 
  -5   4 -13    0.49    1.05 
   5  -4 -13    1.09    1.04 
   1  -5 -13    0.14    0.99 
   4   1 -13    0.60    1.18 
  -4  -1 -13    0.78    1.04 
  -1   5 -13    0.67    0.98 
  -5   4 -13   -0.52    0.83 
  -5   4  13    0.14    0.94 
   1  -5  13    0.19    1.00 
  -1   5  13    2.01    1.25 
  -4  -1  13    0.62    1.14 
   4   1  13    0.65    1.13 
  -5   5 -13    2.83    1.34 
   0   5 -13    2.93    1.36 
   0  -5 -13    5.01    1.40 
  -5   0 -13    1.77    1.18
[truncated: 60,786 more chars]
